# Supplementary material for: Glycine max Homologs of DOESN'T MAKE INFECTIONS 1, 2, and 3 Function to Impair Heterodera glycines Parasitism While Also Regulating Mitogen Activated Protein Kinase Expression
Source: Front Plant Sci. 2022 May 4;13:842597. doi: 10.3389/fpls.2022.842597 (PMC9114929; doi:10.3389/fpls.2022.842597)
Supplement: Supplementary Table 1 — PCR, and RT-qPCR primers used in the analysis. [file Table_1.xlsx]

## Sheet: Sheet1
Gene	Accession	Assay	Primer type	DNA sequence: 5'-->3'
DMI1-1	Glyma.12G167300	RT-qPCR	forward	TCAAACCCCACAACCTCAAC
			reverse	CAGATACAAGATCGGAGTGCG
			probe	[6~FAM]TCACCAGACCTCAACACCATCAGC[BHQ1a~Q]
DMI1-2	Glyma16g00500	RT-qPCR	forward	TCAAACCCCACAACCTCAAC
			reverse	CAGATACAAGATCGGAGAGCG
			probe	[6~FAM]TCACCAGACCTCAACACCATCAGC[BHQ1a~Q]
DMI1-3	Glyma.19G263500	OE	forward	CACCATGTCCCTGGATTCGGAG
			reverse	TCATTCCTTTTCAGTAATCACCAC
		RNAi	forward	CACCCTCCTACTAACGACAAATCTCAGCAGG
			reverse	CGATAAAAATACATCAACCCGATA
		RT-qPCR	forward	CCGCCAGAGATTGGTTCTT
			reverse	CTATTCAAACTCAAAGCCGCAC
			probe	[6~FAM]TCTTGCGGTCCTCTTCTTCGCAAT[BHQ1a~Q]
DMI2-3	Glyma.05G144400	RT-qPCR	forward	TGTCTGCTCAAAGTTCCCAG
			reverse	ACTACAATTCACCCATTCCCAG
			probe	[6~FAM]AGGCGATCCTTGTGTTCCAACTCC[BHQ1a~Q]
DMI2-4	Glyma.08G100800	RT-qPCR	forward	ACCACGCCTCCAAGAATTAC
			reverse	TGCCATCTAACCACAACTCTG
			probe	[6~FAM]TCACCCTTCACATTCCTCCTCGAAAGA[BHQ1a~Q]
DMI2-6	Glyma.10G048800	RT-qPCR	forward	AGCCTTGTTTCTCACCCTTC
			reverse	ACTCCAAAACCTCCAGAACC
			probe	[6~FAM]AGCAGTGTGCAGCTTCAGAAGGA[BHQ1a~Q]
DMI2-7	Glyma.11G246200	OE	forward	CACCATGGGAATCTTGAAACCACTTC
			reverse	CTATCTTGGCTGTGGATGGG
		RNAi	forward	CACCGGAGATTGAGGGAGTTTTC
			reverse	GTGGGTAAGAGCCGTTTGTAGG
		RT-qPCR	forward	CCACTGGTTCTCCCTTCATATC
			reverse	GAAAGTGGCTGCAAGAATTAACT
			probe	[6~FAM]CCCTCGAGCTAAGGCCCTTGAATC[BHQ1a~Q]
DMI2-8	Glyma.13G136700	RT-qPCR	forward	TGTTCTCTTTCTCACTCCTGC
			reverse	CTCCATACCTAAGTTTGTCGGG
			probe	[6~FAM]TCTGCTCAGATGCCAGGTTTTGTAAGT[BHQ1a~Q]
DMI2-9	Glyma.13G352900	RT-qPCR	forward	ACACCAAGGAGATGTTGACG
			reverse	AGTTGTGATTCTCGGGTTCTC
			probe	[6~FAM]ACCTTGCCAATCTCTTGTCATCCCA[BHQ1a~Q]
DMI2-10	Glyma.15G021400	RT-qPCR	forward	GAACAAATACCAACCGCCAG
			reverse	CGTCTGATTCTTTGCTAACACTTG
			probe	[6~FAM]TCATGAGCACCGCAGTTACACCA[BHQ1a~Q]
DMI2-11	Glyma.18G011000	RT-qPCR	forward	GCCGAGAGTTTCCTATAGACAG
			reverse	CGTAGATTGACACAGTAGCCC
			probe	[6~FAM]ACGTTGCTCGAACCAGATGCCT[BHQ1a~Q]
DMI2-12	Glyma.19G178400	RT-qPCR	forward	GCGACCATCAATTTCAGAAGC
			reverse	CCTAGATCCATTGACCCCATG
			probe	[6~FAM]ACAGGCAGAAGCATTAAGAGAAGGCA[BHQ1a~Q]
DMI3-1	Glyma.08G227200	RT-qPCR	forward	GTGGCACAAGATAGGTACTCAG
			reverse	AATTCTCAGGCTTCAAGTCCC
			probe	[6~FAM]CAGGTGTGGTTCGGCAGATAGCTT[BHQ1a~Q]
DMI3-2	Glyma.15G222300	OE	forward	CACCATAGAAAACTCGGGGGAATGAAACTC
			reverse	CTATTGTGGGCGAAGAGAAGAGAG
		RNAi	forward	CACCGACTTTGGGTTGAGTTCTGTTGAG
			reverse	GTTTTTTGGTTCTGAGGAAGATTG
		RT-qPCR	forward	TCCAACAACCCTTCTGGATTT
			reverse	CAGATGCCTTGCTCACAAATG
			probe	[6~FAM]TGGAGAGAAGAAGAGCACAGCAGC[BHQ1a~Q]
MAPK3-1	Glyma.U021800	RT-qPCR	forward	GAAGGGATTCGACGCTTGTT
			reverse	TTGGAATTGAAGCCAATTGC
			probe	[6~FAM]TTCTGACCATCACGACCACAACAATGT[BHQ1a~Q]
MAPK3-2	Glyma.12G073000	RT-qPCR	forward	CAAGGGATTCGACGCTTGTT
			reverse	TGGGAATTGAAGCCAATTGC
			probe	[6~FAM]GCTTCTGACGATCACAACCACAACAATGTC[BHQ1a~Q]
eGFP		PCR	forward	GAACCGCATCGAGCTGAA
			reverse	TGCTTGTCGGCCATGATATAG
RPS21	Glyma.15G147700	qPCR	forward	ATGCAGAACGAGGAAGGACAG
			reverse	GAAGCATGGTCCTTAGCG
			probe	[6~FAM]CCTAGGAAGTGCTCTGCCACAAAC[BHQ1a~Q]
Ar VirG	EU186381	PCR	forward	ATGCGCCATCTTATTACCGAGTATTTAAC
			reverse	TCAGGCCGCCATCAGACC
