# Supplementary material for: Glycine max Homologs of DOESN'T MAKE INFECTIONS 1, 2, and 3 Function to Impair Heterodera glycines Parasitism While Also Regulating Mitogen Activated Protein Kinase Expression
Source: Front Plant Sci. 2022 May 4;13:842597. doi: 10.3389/fpls.2022.842597 (PMC9114929; doi:10.3389/fpls.2022.842597)
Supplement: Supplementary Table 2 — Raw DMI DCM data. Each experiment was replicated independently 3 times. Consequently, each experiment included three independent biological replicates. The cell (pericycle control, or syncytium) samples, obtained at different times have been presented as their respective time point (dpi). The three independent biological replicates included RNA samples isolated from the collected cells for each uninfected control (0 dpi), and H. glycines-infected (3, and 6 dpi) sample for each G. max genotype (G.max[Peking/PI548402], and G.max[PI88788]). The replicated experiments, enacted at different times, were performed using three different microarrays (arrays) per H. glycines-resistant G. max genotype. These H. glycines-resistant G. max genotypes included G.max[Peking/PI548402], and G.max[PI88788]. Red, gene expression was measured (M); blue, gene expression was not measured (NM); gray, not applicable (n/a) because no probe set existed on the microarray to measure expression for that gene (Klink et al., 2010a). The DCM analysis that led to the results occurred using data derived from the three independent replicates with a statistical significance threshold of p < 0.05, Mann–Whitney–Wilcoxon (MWW) Rank Sum Test (Mann and Whitney, 1947). The genes highlighted in yellow were studied subsequently in the functional transgenic experiments (presented in Figures 1, 2). Accession 1: Wm82.a1.v1.1 (2010) annotation. Annotation 2: Wm82.a2.v1 (2015) annotation. Please refer to Materials and Methods subsection: The identification of DMI gene families and root cell-specific expression, for further details. [file Table_2.xlsx]

## Sheet: Sheet1
DMI1					Time point	p-val: Peking/PI 548402			p-val: PI 88788			Time point	p-val: Peking/PI 548402			p-val: PI 88788			Time point	p-val: Peking/PI 548402			p-val: PI 88788
Gene name	Accession 1	Accession 2	Affymetrix® p/s	Annotation	control-0 dpi	array 1	array 2	array 3	array 1	array 2	array 3	3 dpi	array 1	array 2	array 3	array 1	array 2	array 3	6 dpi	array 1	array 2	array 3	array 1	array 2	array 3
DMI1-1	Glyma12g28860	Glyma.12G167300.1	no probe	PTHR31563:SF1 - ION CHANNEL POLLUX-RELATED	n/a	n/a	n/a	n/a	n/a	n/a	n/a	n/a	n/a	n/a	n/a	n/a	n/a	n/a	n/a	n/a	n/a	n/a	n/a	n/a	n/a
DMI1-2	Glyma16g00500	Glyma.16G003300.1	no probe	PTHR31563:SF1 - ION CHANNEL POLLUX-RELATED	n/a	n/a	n/a	n/a	n/a	n/a	n/a	n/a	n/a	n/a	n/a	n/a	n/a	n/a	n/a	n/a	n/a	n/a	n/a	n/a	n/a
DMI1-3	Glyma19g45310	Glyma.19G263500.1	Gma.2604.1.S1_at	PF06241 - Castor and Pollux	N/M	0.0204299	0.0547555	0.0204299	0.00496277	0.00292359	0.00221961	M	0.00221961	0.00167288	0.0164271	0.00167288	0.00382293	0.00496277	M	0.00167288	0.00167288	0.00221961	0.00167288	0.00221961	0.00292359
DMI2					Time point	p-val: Peking/PI 548402			p-val: PI 88788			Time point	p-val: Peking/PI 548402			p-val: PI 88788			Time point	p-val: Peking/PI 548402			p-val: PI 88788
Gene name	Accession 1 (2010)	Accession 2 (2015)	Affymetrix® p/s	Annotation	control-0 dpi	array 1	array 2	array 3	array 1	array 2	array 3	3 dpi	array 1	array 2	array 3	array 1	array 2	array 3	6 dpi	array 1	array 2	array 3	array 1	array 2	array 3
DMI2-1	Glyma01g02451	Glyma.01G020100	no probe	PTHR27003:SF71 - LEUCINE-RICH REPEAT (LRR) FAMILY PROTEIN	n/a	n/a	n/a	n/a	n/a	n/a	n/a	n/a	n/a	n/a	n/a	n/a	n/a	n/a	n/a	n/a	n/a	n/a	n/a	n/a	n/a
DMI2-2	Glyma03g33480	Glyma.03G177600	no probe	PF07714//PF12819 - Protein tyrosine kinase (Malectin_like) Leucine rich repeat (LRR_8)	n/a	n/a	n/a	n/a	n/a	n/a	n/a	n/a	n/a	n/a	n/a	n/a	n/a	n/a	n/a	n/a	n/a	n/a	n/a	n/a	n/a
DMI2-3	Glyma05g27650	Glyma.05G144400	GmaAffx.85957.1.S1_at	PF07714//PF12819 - Protein tyrosine kinase (Malectin_like)	N/M	0.856998	0.605162	0.835968	0.92257	0.993604	0.995037	N/M	0.856998	0.962316	0.983573	0.986884	0.835968	0.605162	N/M	0.856998	0.394838	0.908843	0.703144	0.962316	0.908843
DMI2-4	Glyma08g10640	Glyma.08G100800	Gma.10557.1.A1_at	PF07714//PF12819 - Protein tyrosine kinase (Malectin_like)	N/M	0.97962	0.835968	0.95442	0.703144	0.535424	0.535424	N/M	0.0252302	0.0376841	0.186972	0.07743	0.0203801	0.00382293	N/M	0.00639609	0.0103976	0.0911573	0.07743	0.00292359	0.0131156
DMI2-5	Glyma09g33510	Glyma.09G202300	GmaAffx.46784.1.S1_at	PTHR27003:SF71 - LEUCINE-RICH REPEAT (LRR) FAMILY PROTEIN	N/M	0.0911573	0.908843	0.908843	0.143002	0.0547555	0.5	N/M	0.07743	0.328321	0.123873	0.296856	0.813028	0.0911573	N/M	0.123873	0.296856	0.429432	0.394838	0.788202	0.07743
DMI2-6	Glyma10g05600	Glyma.10G048800	no probe	PF07714//PF12819 - Protein tyrosine kinase (Malectin_like)	n/a	n/a	n/a	n/a	n/a	n/a	n/a	n/a	n/a	n/a	n/a	n/a	n/a	n/a	n/a	n/a	n/a	n/a	n/a	n/a	n/a
DMI2-7	Glyma11g37500	Glyma.11G246200	Gma.6800.1.A1_at	PF07714//PF12819 - Protein tyrosine kinase (Malectin_like)	N/M	0.934667	0.934667	0.969058	0.00167288	0.0911573	0.934667	N/M	0.00382293	0.00221961	0.788202	0.00382293	0.0103976	0.00167288	M	0.0131156	0.0131156	0.0131156	0.00221961	0.0204299	0.0252302
DMI2-8	Glyma13g19960	Glyma.13G136700	no probe	PF07714//PF12819 - Protein tyrosine kinase (Malectin_like)	n/a	n/a	n/a	n/a	n/a	n/a	n/a	n/a	n/a	n/a	n/a	n/a	n/a	n/a	n/a	n/a	n/a	n/a	n/a	n/a	n/a
DMI2-9	Glyma13g42941	Glyma.13G352900	no probe	PF07714//PF12819 - Protein tyrosine kinase (Malectin_like)	n/a	n/a	n/a	n/a	n/a	n/a	n/a	n/a	n/a	n/a	n/a	n/a	n/a	n/a	n/a	n/a	n/a	n/a	n/a	n/a	n/a
DMI2-10	Glyma15g02450	Glyma.15G021400	GmaAffx.78978.1.S1_at	PF07714//PF12819 - Protein tyrosine kinase (Malectin_like)	N/M	0.238453	0.0252302	0.328321	0.00818426	0.00221961	0.0103976	N/M	0.0653326	0.0103976	0.07743	0.0455804	0.07743	0.00496277	N/M	0.00818426	0.0309418	0.266847	0.0103976	0.0309418	0.0131156
DMI2-11	Glyma18g01450	Glyma.18G011000	GmaAffx.54830.1.S1_at	PF07714//PF12819 - Protein tyrosine kinase (Malectin_like)	N/M	0.638946	0.361054	0.570568	0.106612	0.186972	0.0547555	N/M	0.0204299	0.0455804	0.0547555	0.0376841	0.00639609	0.123873	N/M	0.0309418	0.0653326	0.186972	0.211798	0.0131156	0.0455804
DMI2-12	Glyma19g36211	Glyma.19G178400	no probe	PF07714//PF12819 - Protein tyrosine kinase (Malectin_like) Leucine rich repeat (LRR_8)	n/a	n/a	n/a	n/a	n/a	n/a	n/a	n/a	n/a	n/a	n/a	n/a	n/a	n/a	n/a	n/a	n/a	n/a	n/a	n/a	n/a
DMI3					Time point	p-val: Peking/PI 548402			p-val: PI 88788			Time point	p-val: Peking/PI 548402			p-val: PI 88788			Time point	p-val: Peking/PI 548402			p-val: PI 88788
Gene name	Accession 1 (2010)	Accession 2 (2015)	Affymetrix® p/s	annotation	control-0 dpi	array 1	array 2	array 3	array 1	array 2	array 3	3 dpi	array 1	array 2	array 3	array 1	array 2	array 3	6 dpi	array 1	array 2	array 3	array 1	array 2	array 3
DMI3-1	Glyma08g24361	Glyma.08G227200.1	no probe	PTHR24349:SF88 - SERINE/THREONINE-PROTEIN KINASE CG17528	n/a	n/a	n/a	n/a	n/a	n/a	n/a	n/a	n/a	n/a	n/a	n/a	n/a	n/a	n/a	n/a	n/a	n/a	n/a	n/a	n/a
DMI3-2	Glyma15g35070	Glyma.15G222300.1	GmaAffx.4888.1.A1_at	PTHR24349:SF88 - SERINE/THREONINE-PROTEIN KINASE CG17528	N/M	0.00221961	0.733153	0.266847	0.0164271	0.00167288	0.0164271	N/M	0.00382293	0.00221961	0.0204299	0.00382293	0.570568	0.238453	M	0.00382293	0.00818426	0.0252302	0.0131156	0.00382293	0.00639609
