# Supplementary material for: Glycine max Homologs of DOESN'T MAKE INFECTIONS 1, 2, and 3 Function to Impair Heterodera glycines Parasitism While Also Regulating Mitogen Activated Protein Kinase Expression
Source: Front Plant Sci. 2022 May 4;13:842597. doi: 10.3389/fpls.2022.842597 (PMC9114929; doi:10.3389/fpls.2022.842597)
Supplement: Supplementary Table 3 — Summarized G. max DMI genes expressed in syncytia. Gene families and syncytium expression profiles were presented in Supplementary Table 2. The DMI protein family members were identified from the G. max genome through conceptual translation of their gene sequences according to the procedures outlined in the Materials and Methods subsection: Selection of candidate genes. The accessions had represented the gene identifier obtained from the G. max genome. The Accession 1 identifier was obtained from the later 2015 (Wm82.a2.v1) annotation. The Accession 2 identifier was obtained from the earlier 2010 (Wm82.a1.v1.1) annotation. Annotation 2 relates directly to the annotation used in the Klink et al. (2010a,b) Affymetrix® gene expression study employed to generate the gene expression data for the syncytium undergoing the defense process. Table header description: Affymetrix® p/s, probe set identifier relating to the probe set that was fabricated onto the microarray and used to generate the gene expression data. Annotation, the G. max genome annotation of the gene. Time points, the time point (dpi), of H. glycines infection at which time the G. max root cells was collected by LM with their isolated RNA used for the gene expression study. Homologs identified to be expressed in syncytia undergoing the defense response, and not in control cells, studied in the functional transgenic analyses was highlighted in yellow. Blue, expression not measured (NM) to statistically significant levels, p ≥ 0.05. Red, expression measured (M) to statistically significant level, p < 0.05. The statistical significance (*) was calculated using the Mann–Whitney–Wilcoxon (MWW) Rank-Sum Test, p < 0.05 (Mann and Whitney, 1947). Please refer to Materials and Methods subsection: The identification of DMI gene families and root cell-specific expression, for details. [file Table_3.xlsx]

## Sheet: Sheet1
	Time point (dpi)
Gene name	control-0	3	6
DMI1-1	n/a	n/a	n/a
DMI1-2	n/a	n/a	n/a
DMI1-3	N/M	M	M
DMI2-1	n/a	n/a	n/a
DMI2-2	n/a	n/a	n/a
DMI2-3	N/M	N/M	N/M
DMI2-4	N/M	N/M	N/M
DMI2-5	N/M	N/M	N/M
DMI2-6	n/a	n/a	n/a
DMI2-7	N/M	N/M	M
DMI2-8	n/a	n/a	n/a
DMI2-9	n/a	n/a	n/a
DMI2-10	N/M	N/M	N/M
DMI2-11	N/M	N/M	N/M
DMI2-12	n/a	n/a	n/a
DMI3-1	n/a	n/a	n/a
DMI3-2	N/M	N/M	M
