# Supplementary material for: Glycine max Homologs of DOESN'T MAKE INFECTIONS 1, 2, and 3 Function to Impair Heterodera glycines Parasitism While Also Regulating Mitogen Activated Protein Kinase Expression
Source: Front Plant Sci. 2022 May 4;13:842597. doi: 10.3389/fpls.2022.842597 (PMC9114929; doi:10.3389/fpls.2022.842597)
Supplement: Supplementary Table 4 — DMI1 homologs that exist in select agriculturally important crops (Tilman et al., 2011; Ray et al., 2013, 2019). Values not in parentheses have a Blast of e-0. Numbers in parentheses have a Blast cutoff of > e-0. Please refer to Materials and Methods subsections: G. max DMI gene identification, and Proteome mining, for details. [file Table_4.xlsx]

## Sheet: Glycine
	Views	Protein	Species	E-value	% identity	Align len	Strands	Query ID	Query from	Query to	Target from	Target to	Bitscore	# identical	Positives	Gaps	Query len	Target len
	phytozome-next.jgi.doe.gov/report/protein/Gmax_Wm82_a2_v1/Glyma.12G167300.1.p	Glyma.12G167300.1.p	G.max Wm82.a2.v1	0	81	893	+/+	seq.submitted 2021-10-27T14:06:16.464Z UTC	1	882	1	864	1351.65	724	768	40	882	865
	phytozome-next.jgi.doe.gov/report/protein/Gmax_Wm82_a2_v1/Glyma.16G003300.1.p	Glyma.16G003300.1.p	G.max Wm82.a2.v1	0	81	840	+/+	seq.submitted 2021-10-27T14:06:16.464Z UTC	56	882	39	852	1300.03	683	728	39	882	853
	phytozome-next.jgi.doe.gov/report/protein/Gmax_Wm82_a2_v1/Glyma.16G003300.2.p	Glyma.16G003300.2.p	G.max Wm82.a2.v1	0	81	679	+/+	seq.submitted 2021-10-27T14:06:16.464Z UTC	56	721	39	699	1033.09	549	583	31	882	753
	phytozome-next.jgi.doe.gov/report/protein/Gmax_Wm82_a2_v1/Glyma.16G003300.3.p	Glyma.16G003300.3.p	G.max Wm82.a2.v1	0	80	695	+/+	seq.submitted 2021-10-27T14:06:16.464Z UTC	56	737	39	712	1030.01	553	589	34	882	772
	phytozome-next.jgi.doe.gov/report/protein/Gmax_Wm82_a2_v1/Glyma.16G003300.3.p	Glyma.16G003300.3.p	G.max Wm82.a2.v1	2.04e-30	78	73	+/+	seq.submitted 2021-10-27T14:06:16.464Z UTC	810	882	699	771	130.183	57	66	0	882	772
	phytozome-next.jgi.doe.gov/report/protein/Gmax_Wm82_a2_v1/Glyma.19G263500.1.p	Glyma.19G263500.1.p	G.max Wm82.a2.v1	0	69	742	+/+	seq.submitted 2021-10-27T14:06:16.464Z UTC	146	882	110	846	993.416	510	604	10	882	847
	phytozome-next.jgi.doe.gov/report/protein/Gmax_Wm82_a2_v1/Glyma.16G003300.4.p	Glyma.16G003300.4.p	G.max Wm82.a2.v1	0	79	585	+/+	seq.submitted 2021-10-27T14:06:16.464Z UTC	56	627	39	605	865.529	462	496	31	882	788
	phytozome-next.jgi.doe.gov/report/protein/Gmax_Wm82_a2_v1/Glyma.16G003300.4.p	Glyma.16G003300.4.p	G.max Wm82.a2.v1	6.48e-99	86	192	+/+	seq.submitted 2021-10-27T14:06:16.464Z UTC	691	882	604	787	327.791	165	176	8	882	788
	phytozome-next.jgi.doe.gov/report/protein/Gmax_Wm82_a2_v1/Glyma.20G210700.3.p	Glyma.20G210700.3.p	G.max Wm82.a2.v1	3.37e-45	24	665	+/+	seq.submitted 2021-10-27T14:06:16.464Z UTC	268	882	182	820	176.792	159	306	76	882	828
	phytozome-next.jgi.doe.gov/report/protein/Gmax_Wm82_a2_v1/Glyma.20G210700.1.p	Glyma.20G210700.1.p	G.max Wm82.a2.v1	4.81e-45	24	666	+/+	seq.submitted 2021-10-27T14:06:16.464Z UTC	267	882	206	845	176.407	159	306	76	882	853
	phytozome-next.jgi.doe.gov/report/protein/Gmax_Wm82_a2_v1/Glyma.20G210700.2.p	Glyma.20G210700.2.p	G.max Wm82.a2.v1	4.81e-45	24	666	+/+	seq.submitted 2021-10-27T14:06:16.464Z UTC	267	882	206	845	176.407	159	306	76	882	853
	phytozome-next.jgi.doe.gov/report/protein/Gmax_Wm82_a2_v1/Glyma.10G179700.6.p	Glyma.10G179700.6.p	G.max Wm82.a2.v1	7.15e-43	25	667	+/+	seq.submitted 2021-10-27T14:06:16.464Z UTC	268	882	182	820	169.474	165	305	80	882	828
	phytozome-next.jgi.doe.gov/report/protein/Gmax_Wm82_a2_v1/Glyma.10G179700.5.p	Glyma.10G179700.5.p	G.max Wm82.a2.v1	1.02e-42	25	667	+/+	seq.submitted 2021-10-27T14:06:16.464Z UTC	268	882	207	845	169.088	165	305	80	882	853
	phytozome-next.jgi.doe.gov/report/protein/Gmax_Wm82_a2_v1/Glyma.10G179700.4.p	Glyma.10G179700.4.p	G.max Wm82.a2.v1	1.02e-42	25	667	+/+	seq.submitted 2021-10-27T14:06:16.464Z UTC	268	882	207	845	169.088	165	305	80	882	853
	phytozome-next.jgi.doe.gov/report/protein/Gmax_Wm82_a2_v1/Glyma.10G179700.3.p	Glyma.10G179700.3.p	G.max Wm82.a2.v1	1.15e-42	25	667	+/+	seq.submitted 2021-10-27T14:06:16.464Z UTC	268	882	220	858	169.088	165	305	80	882	866
	phytozome-next.jgi.doe.gov/report/protein/Gmax_Wm82_a2_v1/Glyma.10G179700.2.p	Glyma.10G179700.2.p	G.max Wm82.a2.v1	1.35e-42	25	667	+/+	seq.submitted 2021-10-27T14:06:16.464Z UTC	268	882	244	882	169.088	165	305	80	882	890
	phytozome-next.jgi.doe.gov/report/protein/Gmax_Wm82_a2_v1/Glyma.10G179700.1.p	Glyma.10G179700.1.p	G.max Wm82.a2.v1	1.35e-42	25	667	+/+	seq.submitted 2021-10-27T14:06:16.464Z UTC	268	882	247	885	169.088	165	305	80	882	893
	phytozome-next.jgi.doe.gov/report/protein/Gmax_Wm82_a2_v1/Glyma.03G059900.1.p	Glyma.03G059900.1.p	G.max Wm82.a2.v1	6.88e-09	30	111	+/+	seq.submitted 2021-10-27T14:06:16.464Z UTC	465	575	7	112	55.8398	33	58	5	882	121
	Paralogs	Protein/splice variant	Species	E-value	% identity	Align len	Strands	Query ID	Query from	Query to	Target from	Target to	Bitscore
	1	Glyma.12G167300.1.p	G.max Wm82.a2.v1	0	81	893	+/+	seq.submitted 2021-10-27T14:06:16.464Z UTC	1	882	1	864	1351.65
	2	Glyma.16G003300.1.p	G.max Wm82.a2.v1	0	81	840	+/+	seq.submitted 2021-10-27T14:06:16.464Z UTC	56	882	39	852	1300.03
		Glyma.16G003300.2.p	G.max Wm82.a2.v1	0	81	679	+/+	seq.submitted 2021-10-27T14:06:16.464Z UTC	56	721	39	699	1033.09
		Glyma.16G003300.3.p	G.max Wm82.a2.v1	0	80	695	+/+	seq.submitted 2021-10-27T14:06:16.464Z UTC	56	737	39	712	1030.01
		Glyma.16G003300.3.p	G.max Wm82.a2.v1	2.04e-30	78	73	+/+	seq.submitted 2021-10-27T14:06:16.464Z UTC	810	882	699	771	130.183
	3	Glyma.19G263500.1.p	G.max Wm82.a2.v1	0	69	742	+/+	seq.submitted 2021-10-27T14:06:16.464Z UTC	146	882	110	846	993.416
		Glyma.16G003300.4.p	G.max Wm82.a2.v1	0	79	585	+/+	seq.submitted 2021-10-27T14:06:16.464Z UTC	56	627	39	605	865.529
		Glyma.16G003300.4.p	G.max Wm82.a2.v1	6.48e-99	86	192	+/+	seq.submitted 2021-10-27T14:06:16.464Z UTC	691	882	604	787	327.791

## Sheet: Gossypium
	Views	Protein	Species	E-value	% identity	Align len	Strands	Query ID	Query from	Query to	Target from	Target to	Bitscore	# identical	Positives	Gaps	Query len	Target len
	phytozome-next.jgi.doe.gov/report/protein/Ghirsutum_v2_1/Gohir.A03G215200.1.p	Gohir.A03G215200.1.p	G.hirsutum v2.1	0	75	855	+/+	seq.submitted 2021-10-26T20:56:08.522Z UTC	55	881	98	951	1214.52	640	717	29	882	953
	phytozome-next.jgi.doe.gov/report/protein/Ghirsutum_v2_1/Gohir.D02G236700.1.p	Gohir.D02G236700.1.p	G.hirsutum v2.1	0	75	855	+/+	seq.submitted 2021-10-26T20:56:08.522Z UTC	55	881	98	951	1212.59	638	718	29	882	953
	phytozome-next.jgi.doe.gov/report/protein/Ghirsutum_v2_1/Gohir.D02G007500.2.p	Gohir.D02G007500.2.p	G.hirsutum v2.1	0	70	724	+/+	seq.submitted 2021-10-26T20:56:08.522Z UTC	159	882	176	892	1005.36	509	598	7	882	893
	phytozome-next.jgi.doe.gov/report/protein/Ghirsutum_v2_1/Gohir.A02G007700.3.p	Gohir.A02G007700.3.p	G.hirsutum v2.1	0	69	734	+/+	seq.submitted 2021-10-26T20:56:08.522Z UTC	149	882	166	891	1001.12	510	601	8	882	892
	phytozome-next.jgi.doe.gov/report/protein/Ghirsutum_v2_1/Gohir.D02G007500.1.p	Gohir.D02G007500.1.p	G.hirsutum v2.1	0	70	724	+/+	seq.submitted 2021-10-26T20:56:08.522Z UTC	159	882	176	892	1000.73	510	598	7	882	893
	phytozome-next.jgi.doe.gov/report/protein/Ghirsutum_v2_1/Gohir.A02G007700.1.p	Gohir.A02G007700.1.p	G.hirsutum v2.1	0	69	734	+/+	seq.submitted 2021-10-26T20:56:08.522Z UTC	149	882	166	891	994.956	510	600	8	882	892
	phytozome-next.jgi.doe.gov/report/protein/Ghirsutum_v2_1/Gohir.D02G007500.3.p	Gohir.D02G007500.3.p	G.hirsutum v2.1	0	67	724	+/+	seq.submitted 2021-10-26T20:56:08.522Z UTC	159	882	176	861	936.406	483	570	38	882	862
	phytozome-next.jgi.doe.gov/report/protein/Ghirsutum_v2_1/Gohir.A02G007700.4.p	Gohir.A02G007700.4.p	G.hirsutum v2.1	0	66	734	+/+	seq.submitted 2021-10-26T20:56:08.522Z UTC	149	882	166	860	936.021	483	573	39	882	861
	phytozome-next.jgi.doe.gov/report/protein/Ghirsutum_v2_1/Gohir.A02G007700.2.p	Gohir.A02G007700.2.p	G.hirsutum v2.1	0	66	734	+/+	seq.submitted 2021-10-26T20:56:08.522Z UTC	149	882	166	860	929.472	483	572	39	882	861
	phytozome-next.jgi.doe.gov/report/protein/Ghirsutum_v2_1/Gohir.A03G215200.2.p	Gohir.A03G215200.2.p	G.hirsutum v2.1	0	70	665	+/+	seq.submitted 2021-10-26T20:56:08.522Z UTC	55	691	98	761	862.062	465	533	29	882	768
	phytozome-next.jgi.doe.gov/report/protein/Ghirsutum_v2_1/Gohir.D02G236700.2.p	Gohir.D02G236700.2.p	G.hirsutum v2.1	0	70	665	+/+	seq.submitted 2021-10-26T20:56:08.522Z UTC	55	691	98	761	860.522	464	534	29	882	768
	phytozome-next.jgi.doe.gov/report/protein/Ghirsutum_v2_1/Gohir.A09G057200.2.p	Gohir.A09G057200.2.p	G.hirsutum v2.1	3.85e-51	24	670	+/+	seq.submitted 2021-10-26T20:56:08.522Z UTC	268	882	121	754	194.126	164	319	91	882	762
	phytozome-next.jgi.doe.gov/report/protein/Ghirsutum_v2_1/Gohir.A09G057200.1.p	Gohir.A09G057200.1.p	G.hirsutum v2.1	5.47e-51	24	670	+/+	seq.submitted 2021-10-26T20:56:08.522Z UTC	268	882	216	849	194.897	164	319	91	882	857
	phytozome-next.jgi.doe.gov/report/protein/Ghirsutum_v2_1/Gohir.A09G222100.2.p	Gohir.A09G222100.2.p	G.hirsutum v2.1	1.12e-50	24	678	+/+	seq.submitted 2021-10-26T20:56:08.522Z UTC	268	882	136	777	192.971	164	324	99	882	785
	phytozome-next.jgi.doe.gov/report/protein/Ghirsutum_v2_1/Gohir.D09G056400.1.p	Gohir.D09G056400.1.p	G.hirsutum v2.1	1.46e-48	24	672	+/+	seq.submitted 2021-10-26T20:56:08.522Z UTC	268	882	216	849	187.578	163	317	95	882	857
	phytozome-next.jgi.doe.gov/report/protein/Ghirsutum_v2_1/Gohir.D09G224200.1.p	Gohir.D09G224200.1.p	G.hirsutum v2.1	1.27e-47	24	678	+/+	seq.submitted 2021-10-26T20:56:08.522Z UTC	268	882	215	856	184.496	162	321	99	882	864
	phytozome-next.jgi.doe.gov/report/protein/Ghirsutum_v2_1/Gohir.D10G152700.1.p	Gohir.D10G152700.1.p	G.hirsutum v2.1	8.22e-41	23	678	+/+	seq.submitted 2021-10-26T20:56:08.522Z UTC	268	882	217	824	163.31	157	300	133	882	831
	phytozome-next.jgi.doe.gov/report/protein/Ghirsutum_v2_1/Gohir.A10G114400.1.p	Gohir.A10G114400.1.p	G.hirsutum v2.1	5.83e-33	22	633	+/+	seq.submitted 2021-10-26T20:56:08.522Z UTC	268	817	212	789	138.658	141	274	138	882	789
	Paralogs	Protein/splice variant	Species	E-value	% identity	Align len	Strands	Query ID	Query from	Query to	Target from	Target to	Bitscore
	1	Gohir.A02G007700.1.p	G.hirsutum v2.1	0	69	734	+/+	seq.submitted 2021-10-26T20:56:08.522Z UTC	149	882	166	891	994.956
		Gohir.A02G007700.2.p	G.hirsutum v2.1	0	66	734	+/+	seq.submitted 2021-10-26T20:56:08.522Z UTC	149	882	166	860	929.472
		Gohir.A02G007700.3.p	G.hirsutum v2.1	0	69	734	+/+	seq.submitted 2021-10-26T20:56:08.522Z UTC	149	882	166	891	1001.12
		Gohir.A02G007700.4.p	G.hirsutum v2.1	0	66	734	+/+	seq.submitted 2021-10-26T20:56:08.522Z UTC	149	882	166	860	936.021
	2	Gohir.A03G215200.1.p	G.hirsutum v2.1	0	75	855	+/+	seq.submitted 2021-10-26T20:56:08.522Z UTC	55	881	98	951	1214.52
		Gohir.A03G215200.2.p	G.hirsutum v2.1	0	70	665	+/+	seq.submitted 2021-10-26T20:56:08.522Z UTC	55	691	98	761	862.062
	3	Gohir.D02G007500.1.p	G.hirsutum v2.1	0	70	724	+/+	seq.submitted 2021-10-26T20:56:08.522Z UTC	159	882	176	892	1000.73
		Gohir.D02G007500.2.p	G.hirsutum v2.1	0	70	724	+/+	seq.submitted 2021-10-26T20:56:08.522Z UTC	159	882	176	892	1005.36
		Gohir.D02G007500.3.p	G.hirsutum v2.1	0	67	724	+/+	seq.submitted 2021-10-26T20:56:08.522Z UTC	159	882	176	861	936.406
	4	Gohir.D02G236700.1.p	G.hirsutum v2.1	0	75	855	+/+	seq.submitted 2021-10-26T20:56:08.522Z UTC	55	881	98	951	1212.59
		Gohir.D02G236700.2.p	G.hirsutum v2.1	0	70	665	+/+	seq.submitted 2021-10-26T20:56:08.522Z UTC	55	691	98	761	860.522

## Sheet: Manihot
	Views	Protein	Species	E-value	% identity	Align len	Strands	Query ID	Query from	Query to	Target from	Target to	Bitscore	# identical	Positives	Gaps	Query len	Target len
	phytozome-next.jgi.doe.gov/report/protein/Mesculenta_v8_1/Manes.07G023400.1.p	Manes.07G023400.1.p	M.esculenta v8.1	0	84	758	+/+	seq.submitted 2021-10-26T20:59:27.162Z UTC	131	879	185	939	1231.08	633	686	12	882	943
	phytozome-next.jgi.doe.gov/report/protein/Mesculenta_v8_1/Manes.07G023400.3.p	Manes.07G023400.3.p	M.esculenta v8.1	0	86	719	+/+	seq.submitted 2021-10-26T20:59:27.162Z UTC	170	879	198	916	1215.29	621	666	9	882	920
	phytozome-next.jgi.doe.gov/report/protein/Mesculenta_v8_1/Manes.07G023400.4.p	Manes.07G023400.4.p	M.esculenta v8.1	0	81	604	+/+	seq.submitted 2021-10-26T20:59:27.162Z UTC	131	725	185	785	941.414	490	537	12	882	854
	phytozome-next.jgi.doe.gov/report/protein/Mesculenta_v8_1/Manes.07G023400.4.p	Manes.07G023400.4.p	M.esculenta v8.1	8.9e-31	83	70	+/+	seq.submitted 2021-10-26T20:59:27.162Z UTC	810	879	781	850	131.339	58	64	0	882	854
	phytozome-next.jgi.doe.gov/report/protein/Mesculenta_v8_1/Manes.07G023400.2.p	Manes.07G023400.2.p	M.esculenta v8.1	0	81	570	+/+	seq.submitted 2021-10-26T20:59:27.162Z UTC	131	691	185	751	889.797	461	507	12	882	812
	phytozome-next.jgi.doe.gov/report/protein/Mesculenta_v8_1/Manes.02G213500.2.p	Manes.02G213500.2.p	M.esculenta v8.1	0	65	631	+/+	seq.submitted 2021-10-26T20:59:27.162Z UTC	134	760	140	743	774.622	410	484	31	882	753
	phytozome-next.jgi.doe.gov/report/protein/Mesculenta_v8_1/Manes.03G170100.10.p	Manes.03G170100.10.p	M.esculenta v8.1	6.47e-47	23	643	+/+	seq.submitted 2021-10-26T20:59:27.162Z UTC	268	882	139	716	180.644	150	299	93	882	728
	phytozome-next.jgi.doe.gov/report/protein/Mesculenta_v8_1/Manes.03G170100.6.p	Manes.03G170100.6.p	M.esculenta v8.1	8.25e-47	23	643	+/+	seq.submitted 2021-10-26T20:59:27.162Z UTC	268	882	209	786	181.03	150	299	93	882	798
	phytozome-next.jgi.doe.gov/report/protein/Mesculenta_v8_1/Manes.03G170100.7.p	Manes.03G170100.7.p	M.esculenta v8.1	1.07e-46	23	681	+/+	seq.submitted 2021-10-26T20:59:27.162Z UTC	268	882	139	779	180.644	157	313	106	882	791
	phytozome-next.jgi.doe.gov/report/protein/Mesculenta_v8_1/Manes.03G170100.3.p	Manes.03G170100.3.p	M.esculenta v8.1	1.94e-46	23	681	+/+	seq.submitted 2021-10-26T20:59:27.162Z UTC	268	882	205	845	180.259	157	313	106	882	857
	phytozome-next.jgi.doe.gov/report/protein/Mesculenta_v8_1/Manes.03G170100.9.p	Manes.03G170100.9.p	M.esculenta v8.1	1.97e-46	23	681	+/+	seq.submitted 2021-10-26T20:59:27.162Z UTC	268	882	209	849	180.259	157	313	106	882	861
	phytozome-next.jgi.doe.gov/report/protein/Mesculenta_v8_1/Manes.03G170100.1.p	Manes.03G170100.1.p	M.esculenta v8.1	1.97e-46	23	681	+/+	seq.submitted 2021-10-26T20:59:27.162Z UTC	268	882	209	849	180.259	157	313	106	882	861
	Paralogs	Protein/splice variant	Species	E-value	% identity	Align len	Strands	Query ID	Query from	Query to	Target from	Target to	Bitscore
	1	Manes.07G023400.1.p	M.esculenta v8.1	0	84	758	+/+	seq.submitted 2021-10-26T20:59:27.162Z UTC	131	879	185	939	1231.08
		Manes.07G023400.3.p	M.esculenta v8.1	0	86	719	+/+	seq.submitted 2021-10-26T20:59:27.162Z UTC	170	879	198	916	1215.29
		Manes.07G023400.4.p	M.esculenta v8.1	0	81	604	+/+	seq.submitted 2021-10-26T20:59:27.162Z UTC	131	725	185	785	941.414
		Manes.07G023400.4.p	M.esculenta v8.1	8.9e-31	83	70	+/+	seq.submitted 2021-10-26T20:59:27.162Z UTC	810	879	781	850	131.339
		Manes.07G023400.2.p	M.esculenta v8.1	0	81	570	+/+	seq.submitted 2021-10-26T20:59:27.162Z UTC	131	691	185	751	889.797
	2	Manes.02G213500.2.p	M.esculenta v8.1	0	65	631	+/+	seq.submitted 2021-10-26T20:59:27.162Z UTC	134	760	140	743	774.622

## Sheet: Zea
	Views	Protein	Species	E-value	% identity	Align len	Strands	Query ID	Query from	Query to	Target from	Target to	Bitscore	# identical	Positives	Gaps	Query len	Target len
	phytozome-next.jgi.doe.gov/report/protein/Zmays_RefGen_V4/Zm00001d042694_P002	Zm00001d042694_P002	Z.mays RefGen_V4	0	70	844	+/+	seq.submitted 2021-10-26T22:58:38.977Z UTC	57	882	115	955	1116.29	593	674	21	882	956
	phytozome-next.jgi.doe.gov/report/protein/Zmays_RefGen_V4/Zm00001d042694_P001	Zm00001d042694_P001	Z.mays RefGen_V4	0	66	846	+/+	seq.submitted 2021-10-26T22:58:38.977Z UTC	57	882	115	922	1029.62	558	637	58	882	923
	phytozome-next.jgi.doe.gov/report/protein/Zmays_RefGen_V4/Zm00001d012863_P004	Zm00001d012863_P004	Z.mays RefGen_V4	0	72	678	+/+	seq.submitted 2021-10-26T22:58:38.977Z UTC	205	882	221	893	962.985	488	576	5	882	894
	phytozome-next.jgi.doe.gov/report/protein/Zmays_RefGen_V4/Zm00001d012863_P006	Zm00001d012863_P006	Z.mays RefGen_V4	0	71	678	+/+	seq.submitted 2021-10-26T22:58:38.977Z UTC	205	882	221	893	951.044	483	572	5	882	894
	phytozome-next.jgi.doe.gov/report/protein/Zmays_RefGen_V4/Zm00001d012863_P008	Zm00001d012863_P008	Z.mays RefGen_V4	0	71	678	+/+	seq.submitted 2021-10-26T22:58:38.977Z UTC	205	882	219	891	950.273	483	572	5	882	892
	phytozome-next.jgi.doe.gov/report/protein/Zmays_RefGen_V4/Zm00001d012863_P003	Zm00001d012863_P003	Z.mays RefGen_V4	0	70	687	+/+	seq.submitted 2021-10-26T22:58:38.977Z UTC	205	882	221	902	934.865	480	568	14	882	903
	phytozome-next.jgi.doe.gov/report/protein/Zmays_RefGen_V4/Zm00001d042694_P003	Zm00001d042694_P003	Z.mays RefGen_V4	0	85	468	+/+	seq.submitted 2021-10-26T22:58:38.977Z UTC	224	691	2	469	784.637	397	427	0	882	472
	phytozome-next.jgi.doe.gov/report/protein/Zmays_RefGen_V4/Zm00001d012863_P009	Zm00001d012863_P009	Z.mays RefGen_V4	0	71	429	+/+	seq.submitted 2021-10-26T22:58:38.977Z UTC	205	633	221	644	595.89	304	360	5	882	655
	phytozome-next.jgi.doe.gov/report/protein/Zmays_RefGen_V4/Zm00001d012863_P010	Zm00001d012863_P010	Z.mays RefGen_V4	0	71	429	+/+	seq.submitted 2021-10-26T22:58:38.977Z UTC	205	633	221	644	595.89	304	360	5	882	655
	phytozome-next.jgi.doe.gov/report/protein/Zmays_RefGen_V4/Zm00001d012863_P002	Zm00001d012863_P002	Z.mays RefGen_V4	0	72	374	+/+	seq.submitted 2021-10-26T22:58:38.977Z UTC	509	882	22	395	557.755	270	321	0	882	396
	phytozome-next.jgi.doe.gov/report/protein/Zmays_RefGen_V4/Zm00001d012863_P014	Zm00001d012863_P014	Z.mays RefGen_V4	6.85e-134	72	306	+/+	seq.submitted 2021-10-26T22:58:38.977Z UTC	205	510	106	406	407.912	219	257	5	882	409
	phytozome-next.jgi.doe.gov/report/protein/Zmays_RefGen_V4/Zm00001d012863_P005	Zm00001d012863_P005	Z.mays RefGen_V4	2.17e-132	72	306	+/+	seq.submitted 2021-10-26T22:58:38.977Z UTC	205	510	221	521	408.297	219	257	5	882	524
	phytozome-next.jgi.doe.gov/report/protein/Zmays_RefGen_V4/Zm00001d042694_P004	Zm00001d042694_P004	Z.mays RefGen_V4	2.28e-112	69	286	+/+	seq.submitted 2021-10-26T22:58:38.977Z UTC	160	441	6	291	348.206	196	227	4	882	307
	phytozome-next.jgi.doe.gov/report/protein/Zmays_RefGen_V4/Zm00001d039801_P001	Zm00001d039801_P001	Z.mays RefGen_V4	1.18e-80	74	184	+/+	seq.submitted 2021-10-26T22:58:38.977Z UTC	626	809	97	280	263.462	137	156	0	882	281
	phytozome-next.jgi.doe.gov/report/protein/Zmays_RefGen_V4/Zm00001d012863_P012	Zm00001d012863_P012	Z.mays RefGen_V4	8.3e-78	76	172	+/+	seq.submitted 2021-10-26T22:58:38.977Z UTC	639	810	1	172	251.906	130	148	0	882	174
	phytozome-next.jgi.doe.gov/report/protein/Zmays_RefGen_V4/Zm00001d012863_P013	Zm00001d012863_P013	Z.mays RefGen_V4	8.3e-78	76	172	+/+	seq.submitted 2021-10-26T22:58:38.977Z UTC	639	810	1	172	251.906	130	148	0	882	174
	phytozome-next.jgi.doe.gov/report/protein/Zmays_RefGen_V4/Zm00001d012863_P001	Zm00001d012863_P001	Z.mays RefGen_V4	1.22e-77	66	217	+/+	seq.submitted 2021-10-26T22:58:38.977Z UTC	205	421	221	432	261.151	144	175	5	882	442
	phytozome-next.jgi.doe.gov/report/protein/Zmays_RefGen_V4/Zm00001d012863_P011	Zm00001d012863_P011	Z.mays RefGen_V4	1.29e-77	66	217	+/+	seq.submitted 2021-10-26T22:58:38.977Z UTC	205	421	221	432	261.151	144	175	5	882	444
	phytozome-next.jgi.doe.gov/report/protein/Zmays_RefGen_V4/Zm00001d012863_P007	Zm00001d012863_P007	Z.mays RefGen_V4	2.42e-77	66	217	+/+	seq.submitted 2021-10-26T22:58:38.977Z UTC	205	421	221	432	260.381	144	175	5	882	446
	phytozome-next.jgi.doe.gov/report/protein/Zmays_RefGen_V4/Zm00001d027768_P023	Zm00001d027768_P023	Z.mays RefGen_V4	2.77e-36	23	714	+/+	seq.submitted 2021-10-26T22:58:38.977Z UTC	268	882	228	892	149.828	162	306	148	882	906
	phytozome-next.jgi.doe.gov/report/protein/Zmays_RefGen_V4/Zm00001d027768_P005	Zm00001d027768_P005	Z.mays RefGen_V4	1.79e-31	24	523	+/+	seq.submitted 2021-10-26T22:58:38.977Z UTC	268	720	196	704	134.035	125	235	84	882	712
	phytozome-next.jgi.doe.gov/report/protein/Zmays_RefGen_V4/Zm00001d027768_P007	Zm00001d027768_P007	Z.mays RefGen_V4	2.43e-31	24	459	+/+	seq.submitted 2021-10-26T22:58:38.977Z UTC	268	672	196	644	133.65	110	209	64	882	711
	phytozome-next.jgi.doe.gov/report/protein/Zmays_RefGen_V4/Zm00001d039396_P001	Zm00001d039396_P001	Z.mays RefGen_V4	8.73e-29	77	81	+/+	seq.submitted 2021-10-26T22:58:38.977Z UTC	361	441	65	143	114.775	62	68	2	882	155
	phytozome-next.jgi.doe.gov/report/protein/Zmays_RefGen_V4/Zm00001d027768_P002	Zm00001d027768_P002	Z.mays RefGen_V4	5.91e-23	23	525	+/+	seq.submitted 2021-10-26T22:58:38.977Z UTC	443	882	37	521	105.916	123	218	125	882	535
	phytozome-next.jgi.doe.gov/report/protein/Zmays_RefGen_V4/Zm00001d027768_P003	Zm00001d027768_P003	Z.mays RefGen_V4	5.9e-19	23	527	+/+	seq.submitted 2021-10-26T22:58:38.977Z UTC	443	882	37	517	93.5893	121	217	133	882	531
	phytozome-next.jgi.doe.gov/report/protein/Zmays_RefGen_V4/Zm00001d027768_P010	Zm00001d027768_P010	Z.mays RefGen_V4	9.24e-19	24	285	+/+	seq.submitted 2021-10-26T22:58:38.977Z UTC	268	538	196	475	92.4337	67	138	19	882	489
	phytozome-next.jgi.doe.gov/report/protein/Zmays_RefGen_V4/Zm00001d027768_P008	Zm00001d027768_P008	Z.mays RefGen_V4	1.91e-15	23	263	+/+	seq.submitted 2021-10-26T22:58:38.977Z UTC	268	516	196	453	82.0333	61	127	19	882	495
	phytozome-next.jgi.doe.gov/report/protein/Zmays_RefGen_V4/Zm00001d027768_P004	Zm00001d027768_P004	Z.mays RefGen_V4	1.91e-15	23	263	+/+	seq.submitted 2021-10-26T22:58:38.977Z UTC	268	516	196	453	82.0333	61	127	19	882	495
	phytozome-next.jgi.doe.gov/report/protein/Zmays_RefGen_V4/Zm00001d027768_P012	Zm00001d027768_P012	Z.mays RefGen_V4	1.91e-15	23	263	+/+	seq.submitted 2021-10-26T22:58:38.977Z UTC	268	516	196	453	82.0333	61	127	19	882	495
	phytozome-next.jgi.doe.gov/report/protein/Zmays_RefGen_V4/Zm00001d027768_P016	Zm00001d027768_P016	Z.mays RefGen_V4	1.91e-15	23	263	+/+	seq.submitted 2021-10-26T22:58:38.977Z UTC	268	516	196	453	82.0333	61	127	19	882	495
	phytozome-next.jgi.doe.gov/report/protein/Zmays_RefGen_V4/Zm00001d027768_P014	Zm00001d027768_P014	Z.mays RefGen_V4	1.91e-15	23	263	+/+	seq.submitted 2021-10-26T22:58:38.977Z UTC	268	516	196	453	82.0333	61	127	19	882	495
	phytozome-next.jgi.doe.gov/report/protein/Zmays_RefGen_V4/Zm00001d027768_P021	Zm00001d027768_P021	Z.mays RefGen_V4	7.27e-09	22	184	+/+	seq.submitted 2021-10-26T22:58:38.977Z UTC	268	437	101	281	60.077	41	89	17	882	284
	phytozome-next.jgi.doe.gov/report/protein/Zmays_RefGen_V4/Zm00001d027768_P001	Zm00001d027768_P001	Z.mays RefGen_V4	7.27e-09	22	184	+/+	seq.submitted 2021-10-26T22:58:38.977Z UTC	268	437	101	281	60.077	41	89	17	882	284
	phytozome-next.jgi.doe.gov/report/protein/Zmays_RefGen_V4/Zm00001d027768_P020	Zm00001d027768_P020	Z.mays RefGen_V4	2.56e-08	22	184	+/+	seq.submitted 2021-10-26T22:58:38.977Z UTC	268	437	196	376	58.9214	41	89	17	882	379
	phytozome-next.jgi.doe.gov/report/protein/Zmays_RefGen_V4/Zm00001d027768_P011	Zm00001d027768_P011	Z.mays RefGen_V4	2.56e-08	22	184	+/+	seq.submitted 2021-10-26T22:58:38.977Z UTC	268	437	196	376	58.9214	41	89	17	882	379
	phytozome-next.jgi.doe.gov/report/protein/Zmays_RefGen_V4/Zm00001d027768_P024	Zm00001d027768_P024	Z.mays RefGen_V4	5.08e-08	22	171	+/+	seq.submitted 2021-10-26T22:58:38.977Z UTC	279	437	241	408	58.151	38	85	15	882	411
	phytozome-next.jgi.doe.gov/report/protein/Zmays_RefGen_V4/Zm00001d027768_P022	Zm00001d027768_P022	Z.mays RefGen_V4	5.08e-08	22	171	+/+	seq.submitted 2021-10-26T22:58:38.977Z UTC	279	437	241	408	58.151	38	85	15	882	411
	phytozome-next.jgi.doe.gov/report/protein/Zmays_RefGen_V4/Zm00001d020140_P005	Zm00001d020140_P005	Z.mays RefGen_V4	0.0406	38	93	+/+	seq.submitted 2021-10-26T22:58:38.977Z UTC	299	384	92	168	38.1206	35	44	23	882	178
	phytozome-next.jgi.doe.gov/report/protein/Zmays_RefGen_V4/Zm00001d020140_P004	Zm00001d020140_P004	Z.mays RefGen_V4	0.0406	38	93	+/+	seq.submitted 2021-10-26T22:58:38.977Z UTC	299	384	92	168	38.1206	35	44	23	882	178
	Paralogs	Protein/splice variant	Species	E-value	% identity	Align len	Strands	Query ID	Query from	Query to	Target from	Target to	Bitscore
	1	Zm00001d012863_P002	Z.mays RefGen_V4	0	72	374	+/+	seq.submitted 2021-10-26T22:58:38.977Z UTC	509	882	22	395	557.755
		Zm00001d012863_P003	Z.mays RefGen_V4	0	70	687	+/+	seq.submitted 2021-10-26T22:58:38.977Z UTC	205	882	221	902	934.865
		Zm00001d012863_P004	Z.mays RefGen_V4	0	72	678	+/+	seq.submitted 2021-10-26T22:58:38.977Z UTC	205	882	221	893	962.985
		Zm00001d012863_P005	Z.mays RefGen_V4	2.17e-132	72	306	+/+	seq.submitted 2021-10-26T22:58:38.977Z UTC	205	510	221	521	408.297
		Zm00001d012863_P006	Z.mays RefGen_V4	0	71	678	+/+	seq.submitted 2021-10-26T22:58:38.977Z UTC	205	882	221	893	951.044
		Zm00001d012863_P008	Z.mays RefGen_V4	0	71	678	+/+	seq.submitted 2021-10-26T22:58:38.977Z UTC	205	882	219	891	950.273
		Zm00001d012863_P009	Z.mays RefGen_V4	0	71	429	+/+	seq.submitted 2021-10-26T22:58:38.977Z UTC	205	633	221	644	595.89
		Zm00001d012863_P010	Z.mays RefGen_V4	0	71	429	+/+	seq.submitted 2021-10-26T22:58:38.977Z UTC	205	633	221	644	595.89
		Zm00001d012863_P014	Z.mays RefGen_V4	6.85e-134	72	306	+/+	seq.submitted 2021-10-26T22:58:38.977Z UTC	205	510	106	406	407.912
	2	Zm00001d042694_P001	Z.mays RefGen_V4	0	66	846	+/+	seq.submitted 2021-10-26T22:58:38.977Z UTC	57	882	115	922	1029.62
		Zm00001d042694_P002	Z.mays RefGen_V4	0	70	844	+/+	seq.submitted 2021-10-26T22:58:38.977Z UTC	57	882	115	955	1116.29
		Zm00001d042694_P003	Z.mays RefGen_V4	0	85	468	+/+	seq.submitted 2021-10-26T22:58:38.977Z UTC	224	691	2	469	784.637
		Zm00001d042694_P004	Z.mays RefGen_V4	2.28e-112	69	286	+/+	seq.submitted 2021-10-26T22:58:38.977Z UTC	160	441	6	291	348.206

## Sheet: Oryza
	Views	Protein	Species	E-value	% identity	Align len	Strands	Query ID	Query from	Query to	Target from	Target to	Bitscore	# identical	Positives	Gaps	Query len	Target len
	phytozome-next.jgi.doe.gov/report/protein/Osativa_v7_0/LOC_Os01g64980.2	LOC_Os01g64980.2	O.sativa v7.0	0	75	757	+/+	seq.submitted 2021-10-26T21:04:38.390Z UTC	133	882	190	943	1106.66	566	643	10	882	944
	phytozome-next.jgi.doe.gov/report/protein/Osativa_v7_0/LOC_Os01g64980.1	LOC_Os01g64980.1	O.sativa v7.0	0	75	754	+/+	seq.submitted 2021-10-26T21:04:38.390Z UTC	133	879	190	940	1105.12	565	641	10	882	966
	phytozome-next.jgi.doe.gov/report/protein/Osativa_v7_0/LOC_Os03g62650.1	LOC_Os03g62650.1	O.sativa v7.0	0	68	754	+/+	seq.submitted 2021-10-26T21:04:38.390Z UTC	135	882	144	893	979.163	511	605	10	882	894
	phytozome-next.jgi.doe.gov/report/protein/Osativa_v7_0/LOC_Os03g62650.2	LOC_Os03g62650.2	O.sativa v7.0	0	68	593	+/+	seq.submitted 2021-10-26T21:04:38.390Z UTC	135	721	144	732	762.296	404	475	10	882	742
	phytozome-next.jgi.doe.gov/report/protein/Osativa_v7_0/LOC_Os03g62650.3	LOC_Os03g62650.3	O.sativa v7.0	0	65	499	+/+	seq.submitted 2021-10-26T21:04:38.390Z UTC	135	627	144	638	609.757	325	391	10	882	645
	phytozome-next.jgi.doe.gov/report/protein/Osativa_v7_0/LOC_Os03g06720.1	LOC_Os03g06720.1	O.sativa v7.0	1.19e-40	23	668	+/+	seq.submitted 2021-10-26T21:04:38.390Z UTC	279	882	218	845	161.77	155	298	104	882	859
	phytozome-next.jgi.doe.gov/report/protein/Osativa_v7_0/LOC_Os03g06720.1	LOC_Os03g06720.1	O.sativa v7.0	0.00672	23	306	+/+	seq.submitted 2021-10-26T21:04:38.390Z UTC	334	596	567	854	40.817	71	128	61	882	859
	Paralogs	Protein/splice variant	Species	E-value	% identity	Align len	Strands	Query ID	Query from	Query to	Target from	Target to	Bitscore
	1	LOC_Os01g64980.1	O.sativa v7.0	0	75	754	+/+	seq.submitted 2021-10-26T21:04:38.390Z UTC	133	879	190	940	1105.12
		LOC_Os01g64980.2	O.sativa v7.0	0	75	757	+/+	seq.submitted 2021-10-26T21:04:38.390Z UTC	133	882	190	943	1106.66
	2	LOC_Os03g62650.1	O.sativa v7.0	0	68	754	+/+	seq.submitted 2021-10-26T21:04:38.390Z UTC	135	882	144	893	979.163
		LOC_Os03g62650.2	O.sativa v7.0	0	68	593	+/+	seq.submitted 2021-10-26T21:04:38.390Z UTC	135	721	144	732	762.296
		LOC_Os03g62650.3	O.sativa v7.0	0	65	499	+/+	seq.submitted 2021-10-26T21:04:38.390Z UTC	135	627	144	638	609.757

## Sheet: Triticum
	Views	Protein	Species	E-value	% identity	Align len	Strands	Query ID	Query from	Query to	Target from	Target to	Bitscore	# identical	Positives	Gaps	Query len	Target len
	phytozome-next.jgi.doe.gov/report/protein/Taestivum_v2_2/Traes_3AL_033375A71.1	Traes_3AL_033375A71.1	T.aestivum v2.2	0	80	684	+/+	seq.submitted 2021-10-26T21:06:43.164Z UTC	199	882	50	732	1096.26	550	607	1	882	733
	phytozome-next.jgi.doe.gov/report/protein/Taestivum_v2_2/Traes_3B_36B347970.3	Traes_3B_36B347970.3	T.aestivum v2.2	0	80	684	+/+	seq.submitted 2021-10-26T21:06:43.164Z UTC	199	882	50	732	1095.49	549	607	1	882	733
	phytozome-next.jgi.doe.gov/report/protein/Taestivum_v2_2/Traes_3AL_033375A71.2	Traes_3AL_033375A71.2	T.aestivum v2.2	0	80	684	+/+	seq.submitted 2021-10-26T21:06:43.164Z UTC	199	882	1	683	1095.49	550	607	1	882	684
	phytozome-next.jgi.doe.gov/report/protein/Taestivum_v2_2/Traes_3B_36B347970.1	Traes_3B_36B347970.1	T.aestivum v2.2	0	80	684	+/+	seq.submitted 2021-10-26T21:06:43.164Z UTC	199	882	50	732	1092.41	548	606	1	882	774
	phytozome-next.jgi.doe.gov/report/protein/Taestivum_v2_2/Traes_3B_36B347970.2	Traes_3B_36B347970.2	T.aestivum v2.2	0	80	681	+/+	seq.submitted 2021-10-26T21:06:43.164Z UTC	199	879	50	729	1091.64	548	605	1	882	740
	phytozome-next.jgi.doe.gov/report/protein/Taestivum_v2_2/Traes_3AL_033375A71.3	Traes_3AL_033375A71.3	T.aestivum v2.2	0	78	684	+/+	seq.submitted 2021-10-26T21:06:43.164Z UTC	199	882	1	666	1048.88	533	590	18	882	667
	phytozome-next.jgi.doe.gov/report/protein/Taestivum_v2_2/Traes_3AL_033375A71.4	Traes_3AL_033375A71.4	T.aestivum v2.2	0	78	661	+/+	seq.submitted 2021-10-26T21:06:43.164Z UTC	208	839	1	660	1014.99	518	569	30	882	661
	phytozome-next.jgi.doe.gov/report/protein/Taestivum_v2_2/Traes_3AL_033375A71.5	Traes_3AL_033375A71.5	T.aestivum v2.2	0	75	684	+/+	seq.submitted 2021-10-26T21:06:43.164Z UTC	199	882	1	643	1006.51	516	570	41	882	644
	phytozome-next.jgi.doe.gov/report/protein/Taestivum_v2_2/Traes_5BL_3A626410F.3	Traes_5BL_3A626410F.3	T.aestivum v2.2	0	71	678	+/+	seq.submitted 2021-10-26T21:06:43.164Z UTC	205	882	40	712	951.429	482	572	5	882	713
	phytozome-next.jgi.doe.gov/report/protein/Taestivum_v2_2/Traes_4AL_183973F7A.2	Traes_4AL_183973F7A.2	T.aestivum v2.2	0	71	678	+/+	seq.submitted 2021-10-26T21:06:43.164Z UTC	205	882	40	712	950.658	483	572	5	882	713
	phytozome-next.jgi.doe.gov/report/protein/Taestivum_v2_2/Traes_5DL_66DEEDDE0.6	Traes_5DL_66DEEDDE0.6	T.aestivum v2.2	0	71	678	+/+	seq.submitted 2021-10-26T21:06:43.164Z UTC	205	882	40	711	943.725	480	569	6	882	712
	phytozome-next.jgi.doe.gov/report/protein/Taestivum_v2_2/Traes_5DL_66DEEDDE0.2	Traes_5DL_66DEEDDE0.2	T.aestivum v2.2	0	71	679	+/+	seq.submitted 2021-10-26T21:06:43.164Z UTC	205	882	40	712	938.717	480	569	7	882	713
	phytozome-next.jgi.doe.gov/report/protein/Taestivum_v2_2/Traes_5BL_3A626410F.1	Traes_5BL_3A626410F.1	T.aestivum v2.2	0	68	711	+/+	seq.submitted 2021-10-26T21:06:43.164Z UTC	205	882	40	745	934.865	482	572	38	882	746
	phytozome-next.jgi.doe.gov/report/protein/Taestivum_v2_2/Traes_4AL_183973F7A.1	Traes_4AL_183973F7A.1	T.aestivum v2.2	0	68	711	+/+	seq.submitted 2021-10-26T21:06:43.164Z UTC	205	882	40	745	934.48	483	571	38	882	746
	phytozome-next.jgi.doe.gov/report/protein/Taestivum_v2_2/Traes_5BL_3A626410F.2	Traes_5BL_3A626410F.2	T.aestivum v2.2	0	70	678	+/+	seq.submitted 2021-10-26T21:06:43.164Z UTC	205	882	40	712	932.939	475	566	5	882	713
	phytozome-next.jgi.doe.gov/report/protein/Taestivum_v2_2/Traes_4AL_183973F7A.3	Traes_4AL_183973F7A.3	T.aestivum v2.2	0	70	678	+/+	seq.submitted 2021-10-26T21:06:43.164Z UTC	205	882	40	712	931.784	476	565	5	882	713
	phytozome-next.jgi.doe.gov/report/protein/Taestivum_v2_2/Traes_5DL_66DEEDDE0.1	Traes_5DL_66DEEDDE0.1	T.aestivum v2.2	0	68	711	+/+	seq.submitted 2021-10-26T21:06:43.164Z UTC	205	882	40	744	926.776	480	569	39	882	745
	phytozome-next.jgi.doe.gov/report/protein/Taestivum_v2_2/Traes_5DL_66DEEDDE0.5	Traes_5DL_66DEEDDE0.5	T.aestivum v2.2	0	70	678	+/+	seq.submitted 2021-10-26T21:06:43.164Z UTC	205	882	40	711	924.465	473	563	6	882	712
	phytozome-next.jgi.doe.gov/report/protein/Taestivum_v2_2/Traes_5DL_66DEEDDE0.4	Traes_5DL_66DEEDDE0.4	T.aestivum v2.2	0	70	678	+/+	seq.submitted 2021-10-26T21:06:43.164Z UTC	205	882	40	711	924.465	473	563	6	882	712
	phytozome-next.jgi.doe.gov/report/protein/Taestivum_v2_2/Traes_5DL_66DEEDDE0.3	Traes_5DL_66DEEDDE0.3	T.aestivum v2.2	0	70	679	+/+	seq.submitted 2021-10-26T21:06:43.164Z UTC	205	882	40	712	919.457	473	563	7	882	713
	phytozome-next.jgi.doe.gov/report/protein/Taestivum_v2_2/Traes_5BL_3A626410F.4	Traes_5BL_3A626410F.4	T.aestivum v2.2	0	67	678	+/+	seq.submitted 2021-10-26T21:06:43.164Z UTC	205	882	40	677	877.085	452	539	40	882	678
	phytozome-next.jgi.doe.gov/report/protein/Taestivum_v2_2/Traes_4AL_183973F7A.4	Traes_4AL_183973F7A.4	T.aestivum v2.2	0	73	606	+/+	seq.submitted 2021-10-26T21:06:43.164Z UTC	205	810	40	640	869.381	444	518	5	882	642
	phytozome-next.jgi.doe.gov/report/protein/Taestivum_v2_2/Traes_4AL_183973F7A.5	Traes_4AL_183973F7A.5	T.aestivum v2.2	0	72	606	+/+	seq.submitted 2021-10-26T21:06:43.164Z UTC	205	810	40	640	851.277	437	512	5	882	642
	phytozome-next.jgi.doe.gov/report/protein/Taestivum_v2_2/Traes_3DL_DB5BAA1E4.2	Traes_3DL_DB5BAA1E4.2	T.aestivum v2.2	0	84	493	+/+	seq.submitted 2021-10-26T21:06:43.164Z UTC	390	882	1	492	850.121	414	449	1	882	493
	phytozome-next.jgi.doe.gov/report/protein/Taestivum_v2_2/Traes_3DL_DB5BAA1E4.1	Traes_3DL_DB5BAA1E4.1	T.aestivum v2.2	0	84	490	+/+	seq.submitted 2021-10-26T21:06:43.164Z UTC	390	879	1	489	847.81	413	447	1	882	508
	phytozome-next.jgi.doe.gov/report/protein/Taestivum_v2_2/Traes_4AL_183973F7A.8	Traes_4AL_183973F7A.8	T.aestivum v2.2	0	76	536	+/+	seq.submitted 2021-10-26T21:06:43.164Z UTC	275	810	14	549	838.18	408	472	0	882	560
	phytozome-next.jgi.doe.gov/report/protein/Taestivum_v2_2/Traes_5BL_3A626410F.5	Traes_5BL_3A626410F.5	T.aestivum v2.2	0	76	536	+/+	seq.submitted 2021-10-26T21:06:43.164Z UTC	275	810	14	549	837.795	408	472	0	882	561
	phytozome-next.jgi.doe.gov/report/protein/Taestivum_v2_2/Traes_3DL_DB5BAA1E4.3	Traes_3DL_DB5BAA1E4.3	T.aestivum v2.2	0	85	452	+/+	seq.submitted 2021-10-26T21:06:43.164Z UTC	390	841	1	451	792.341	385	416	1	882	451
	phytozome-next.jgi.doe.gov/report/protein/Taestivum_v2_2/Traes_3AL_033375A71.7	Traes_3AL_033375A71.7	T.aestivum v2.2	0	81	493	+/+	seq.submitted 2021-10-26T21:06:43.164Z UTC	199	691	1	493	791.956	397	437	0	882	508
	phytozome-next.jgi.doe.gov/report/protein/Taestivum_v2_2/Traes_3B_36B347970.4	Traes_3B_36B347970.4	T.aestivum v2.2	0	80	493	+/+	seq.submitted 2021-10-26T21:06:43.164Z UTC	199	691	50	542	791.571	396	437	0	882	557
	phytozome-next.jgi.doe.gov/report/protein/Taestivum_v2_2/Traes_5BL_3A626410F.6	Traes_5BL_3A626410F.6	T.aestivum v2.2	0	72	523	+/+	seq.submitted 2021-10-26T21:06:43.164Z UTC	360	882	1	523	774.237	378	447	0	882	524
	phytozome-next.jgi.doe.gov/report/protein/Taestivum_v2_2/Traes_5DL_66DEEDDE0.8	Traes_5DL_66DEEDDE0.8	T.aestivum v2.2	0	72	501	+/+	seq.submitted 2021-10-26T21:06:43.164Z UTC	382	882	1	501	738.799	362	427	0	882	502
	phytozome-next.jgi.doe.gov/report/protein/Taestivum_v2_2/Traes_4AL_183973F7A.7	Traes_4AL_183973F7A.7	T.aestivum v2.2	0	73	517	+/+	seq.submitted 2021-10-26T21:06:43.164Z UTC	205	721	40	551	733.406	377	439	5	882	597
	phytozome-next.jgi.doe.gov/report/protein/Taestivum_v2_2/Traes_3DL_DB5BAA1E4.4	Traes_3DL_DB5BAA1E4.4	T.aestivum v2.2	0	82	415	+/+	seq.submitted 2021-10-26T21:06:43.164Z UTC	468	882	1	414	706.827	341	374	1	882	415
	phytozome-next.jgi.doe.gov/report/protein/Taestivum_v2_2/Traes_3AL_033375A71.8	Traes_3AL_033375A71.8	T.aestivum v2.2	0	80	428	+/+	seq.submitted 2021-10-26T21:06:43.164Z UTC	199	626	1	428	679.478	343	379	0	882	430
	phytozome-next.jgi.doe.gov/report/protein/Taestivum_v2_2/Traes_5DL_66DEEDDE0.7	Traes_5DL_66DEEDDE0.7	T.aestivum v2.2	0	71	487	+/+	seq.submitted 2021-10-26T21:06:43.164Z UTC	205	691	40	520	677.552	347	410	6	882	523
	phytozome-next.jgi.doe.gov/report/protein/Taestivum_v2_2/Traes_3B_36B347970.5	Traes_3B_36B347970.5	T.aestivum v2.2	0	80	427	+/+	seq.submitted 2021-10-26T21:06:43.164Z UTC	199	625	50	476	676.781	341	378	0	882	501
	phytozome-next.jgi.doe.gov/report/protein/Taestivum_v2_2/Traes_3AL_033375A71.6	Traes_3AL_033375A71.6	T.aestivum v2.2	0	72	434	+/+	seq.submitted 2021-10-26T21:06:43.164Z UTC	453	882	169	595	631.713	313	358	11	882	596
	phytozome-next.jgi.doe.gov/report/protein/Taestivum_v2_2/Traes_3AL_033375A71.6	Traes_3AL_033375A71.6	T.aestivum v2.2	3.72e-93	74	224	+/+	seq.submitted 2021-10-26T21:06:43.164Z UTC	199	422	1	224	308.145	166	189	0	882	596
	phytozome-next.jgi.doe.gov/report/protein/Taestivum_v2_2/Traes_3AL_033375A71.9	Traes_3AL_033375A71.9	T.aestivum v2.2	0	76	428	+/+	seq.submitted 2021-10-26T21:06:43.164Z UTC	199	624	1	425	624.394	326	364	5	882	426
	phytozome-next.jgi.doe.gov/report/protein/Taestivum_v2_2/Traes_4AL_12911033F.1	Traes_4AL_12911033F.1	T.aestivum v2.2	0	81	362	+/+	seq.submitted 2021-10-26T21:06:43.164Z UTC	390	751	1	362	608.216	292	320	0	882	461
	phytozome-next.jgi.doe.gov/report/protein/Taestivum_v2_2/Traes_4AL_12911033F.2	Traes_4AL_12911033F.2	T.aestivum v2.2	0	81	356	+/+	seq.submitted 2021-10-26T21:06:43.164Z UTC	390	745	1	356	599.742	288	314	0	882	356
	phytozome-next.jgi.doe.gov/report/protein/Taestivum_v2_2/Traes_4AL_183973F7A.6	Traes_4AL_183973F7A.6	T.aestivum v2.2	0	72	421	+/+	seq.submitted 2021-10-26T21:06:43.164Z UTC	205	625	40	455	599.356	304	361	5	882	617
	phytozome-next.jgi.doe.gov/report/protein/Taestivum_v2_2/Traes_4AL_183973F7A.6	Traes_4AL_183973F7A.6	T.aestivum v2.2	1.07e-54	61	163	+/+	seq.submitted 2021-10-26T21:06:43.164Z UTC	720	882	454	616	202.986	100	127	0	882	617
	phytozome-next.jgi.doe.gov/report/protein/Taestivum_v2_2/Traes_4AL_183973F7A.10	Traes_4AL_183973F7A.10	T.aestivum v2.2	0	72	422	+/+	seq.submitted 2021-10-26T21:06:43.164Z UTC	205	626	40	456	598.586	305	361	5	882	458
	phytozome-next.jgi.doe.gov/report/protein/Taestivum_v2_2/Traes_4AL_183973F7A.11	Traes_4AL_183973F7A.11	T.aestivum v2.2	0	72	422	+/+	seq.submitted 2021-10-26T21:06:43.164Z UTC	205	626	40	456	598.586	305	361	5	882	458
	phytozome-next.jgi.doe.gov/report/protein/Taestivum_v2_2/Traes_4AL_183973F7A.12	Traes_4AL_183973F7A.12	T.aestivum v2.2	0	72	422	+/+	seq.submitted 2021-10-26T21:06:43.164Z UTC	205	626	40	456	598.586	305	361	5	882	458
	phytozome-next.jgi.doe.gov/report/protein/Taestivum_v2_2/Traes_5BL_3A626410F.8	Traes_5BL_3A626410F.8	T.aestivum v2.2	0	72	422	+/+	seq.submitted 2021-10-26T21:06:43.164Z UTC	205	626	40	456	596.66	303	361	5	882	462
	phytozome-next.jgi.doe.gov/report/protein/Taestivum_v2_2/Traes_5BL_3A626410F.10	Traes_5BL_3A626410F.10	T.aestivum v2.2	0	72	422	+/+	seq.submitted 2021-10-26T21:06:43.164Z UTC	205	626	40	456	596.66	303	361	5	882	462
	phytozome-next.jgi.doe.gov/report/protein/Taestivum_v2_2/Traes_5DL_66DEEDDE0.12	Traes_5DL_66DEEDDE0.12	T.aestivum v2.2	0	71	427	+/+	seq.submitted 2021-10-26T21:06:43.164Z UTC	205	631	40	460	592.038	302	361	6	882	463
	phytozome-next.jgi.doe.gov/report/protein/Taestivum_v2_2/Traes_4AL_183973F7A.9	Traes_4AL_183973F7A.9	T.aestivum v2.2	0	70	429	+/+	seq.submitted 2021-10-26T21:06:43.164Z UTC	205	633	40	462	580.482	300	357	6	882	469
	phytozome-next.jgi.doe.gov/report/protein/Taestivum_v2_2/Traes_5BL_3A626410F.9	Traes_5BL_3A626410F.9	T.aestivum v2.2	0	70	422	+/+	seq.submitted 2021-10-26T21:06:43.164Z UTC	205	626	40	456	578.17	296	355	5	882	462
	phytozome-next.jgi.doe.gov/report/protein/Taestivum_v2_2/Traes_5BL_3A626410F.7	Traes_5BL_3A626410F.7	T.aestivum v2.2	0	69	427	+/+	seq.submitted 2021-10-26T21:06:43.164Z UTC	205	631	40	461	578.17	296	357	5	882	464
	phytozome-next.jgi.doe.gov/report/protein/Taestivum_v2_2/Traes_4AL_12911033F.3	Traes_4AL_12911033F.3	T.aestivum v2.2	0	83	333	+/+	seq.submitted 2021-10-26T21:06:43.164Z UTC	390	722	1	333	577.785	277	301	0	882	348
	phytozome-next.jgi.doe.gov/report/protein/Taestivum_v2_2/Traes_5DL_66DEEDDE0.10	Traes_5DL_66DEEDDE0.10	T.aestivum v2.2	0	69	429	+/+	seq.submitted 2021-10-26T21:06:43.164Z UTC	205	633	40	461	574.704	298	355	7	882	468
	phytozome-next.jgi.doe.gov/report/protein/Taestivum_v2_2/Traes_5DL_66DEEDDE0.11	Traes_5DL_66DEEDDE0.11	T.aestivum v2.2	0	69	429	+/+	seq.submitted 2021-10-26T21:06:43.164Z UTC	205	633	40	461	574.704	298	355	7	882	468
	phytozome-next.jgi.doe.gov/report/protein/Taestivum_v2_2/Traes_5DL_66DEEDDE0.9	Traes_5DL_66DEEDDE0.9	T.aestivum v2.2	0	69	430	+/+	seq.submitted 2021-10-26T21:06:43.164Z UTC	205	633	40	462	569.696	298	355	8	882	469
	phytozome-next.jgi.doe.gov/report/protein/Taestivum_v2_2/Traes_5BL_3A626410F.15	Traes_5BL_3A626410F.15	T.aestivum v2.2	0	71	385	+/+	seq.submitted 2021-10-26T21:06:43.164Z UTC	498	882	1	385	567.385	273	325	0	882	386
	phytozome-next.jgi.doe.gov/report/protein/Taestivum_v2_2/Traes_4AL_183973F7A.14	Traes_4AL_183973F7A.14	T.aestivum v2.2	0	71	385	+/+	seq.submitted 2021-10-26T21:06:43.164Z UTC	498	882	1	385	565.459	273	324	0	882	386
	phytozome-next.jgi.doe.gov/report/protein/Taestivum_v2_2/Traes_5DL_66DEEDDE0.13	Traes_5DL_66DEEDDE0.13	T.aestivum v2.2	0	71	385	+/+	seq.submitted 2021-10-26T21:06:43.164Z UTC	498	882	1	385	563.918	272	324	0	882	386
	phytozome-next.jgi.doe.gov/report/protein/Taestivum_v2_2/Traes_5BL_3A626410F.11	Traes_5BL_3A626410F.11	T.aestivum v2.2	0	72	388	+/+	seq.submitted 2021-10-26T21:06:43.164Z UTC	205	592	40	422	548.125	281	333	5	882	424
	phytozome-next.jgi.doe.gov/report/protein/Taestivum_v2_2/Traes_5BL_3A626410F.13	Traes_5BL_3A626410F.13	T.aestivum v2.2	0	69	385	+/+	seq.submitted 2021-10-26T21:06:43.164Z UTC	498	882	1	385	548.125	266	319	0	882	386
	phytozome-next.jgi.doe.gov/report/protein/Taestivum_v2_2/Traes_5BL_3A626410F.12	Traes_5BL_3A626410F.12	T.aestivum v2.2	0	69	385	+/+	seq.submitted 2021-10-26T21:06:43.164Z UTC	498	882	1	385	548.125	266	319	0	882	386
	phytozome-next.jgi.doe.gov/report/protein/Taestivum_v2_2/Traes_5BL_3A626410F.14	Traes_5BL_3A626410F.14	T.aestivum v2.2	0	69	385	+/+	seq.submitted 2021-10-26T21:06:43.164Z UTC	498	882	1	385	548.125	266	319	0	882	386
	phytozome-next.jgi.doe.gov/report/protein/Taestivum_v2_2/Traes_5BL_3A626410F.16	Traes_5BL_3A626410F.16	T.aestivum v2.2	0	69	385	+/+	seq.submitted 2021-10-26T21:06:43.164Z UTC	498	882	1	385	548.125	266	319	0	882	386
	phytozome-next.jgi.doe.gov/report/protein/Taestivum_v2_2/Traes_4AL_183973F7A.13	Traes_4AL_183973F7A.13	T.aestivum v2.2	0	69	385	+/+	seq.submitted 2021-10-26T21:06:43.164Z UTC	498	882	1	385	546.199	266	318	0	882	386
	phytozome-next.jgi.doe.gov/report/protein/Taestivum_v2_2/Traes_4AL_183973F7A.15	Traes_4AL_183973F7A.15	T.aestivum v2.2	0	69	385	+/+	seq.submitted 2021-10-26T21:06:43.164Z UTC	498	882	1	385	546.199	266	318	0	882	386
	phytozome-next.jgi.doe.gov/report/protein/Taestivum_v2_2/Traes_3DL_DB5BAA1E4.6	Traes_3DL_DB5BAA1E4.6	T.aestivum v2.2	0	86	302	+/+	seq.submitted 2021-10-26T21:06:43.164Z UTC	390	691	1	302	545.814	261	279	0	882	317
	phytozome-next.jgi.doe.gov/report/protein/Taestivum_v2_2/Traes_3DL_DB5BAA1E4.5	Traes_3DL_DB5BAA1E4.5	T.aestivum v2.2	0	86	302	+/+	seq.submitted 2021-10-26T21:06:43.164Z UTC	390	691	1	302	545.814	261	279	0	882	317
	phytozome-next.jgi.doe.gov/report/protein/Taestivum_v2_2/Traes_5DL_66DEEDDE0.14	Traes_5DL_66DEEDDE0.14	T.aestivum v2.2	0	69	385	+/+	seq.submitted 2021-10-26T21:06:43.164Z UTC	498	882	1	385	544.658	265	318	0	882	386
	phytozome-next.jgi.doe.gov/report/protein/Taestivum_v2_2/Traes_4AL_12911033F.4	Traes_4AL_12911033F.4	T.aestivum v2.2	2.84e-158	83	269	+/+	seq.submitted 2021-10-26T21:06:43.164Z UTC	390	658	1	269	465.692	222	243	0	882	273
	phytozome-next.jgi.doe.gov/report/protein/Taestivum_v2_2/Traes_4AL_12911033F.5	Traes_4AL_12911033F.5	T.aestivum v2.2	2.84e-158	83	269	+/+	seq.submitted 2021-10-26T21:06:43.164Z UTC	390	658	1	269	465.692	222	243	0	882	273
	phytozome-next.jgi.doe.gov/report/protein/Taestivum_v2_2/Traes_3DL_DB5BAA1E4.7	Traes_3DL_DB5BAA1E4.7	T.aestivum v2.2	3.74e-145	87	236	+/+	seq.submitted 2021-10-26T21:06:43.164Z UTC	390	625	1	236	431.795	206	220	0	882	261
	phytozome-next.jgi.doe.gov/report/protein/Taestivum_v2_2/Traes_5DL_66DEEDDE0.15	Traes_5DL_66DEEDDE0.15	T.aestivum v2.2	1.32e-118	69	263	+/+	seq.submitted 2021-10-26T21:06:43.164Z UTC	620	882	1	263	363.229	182	217	0	882	264
	phytozome-next.jgi.doe.gov/report/protein/Taestivum_v2_2/Traes_4AL_12911033F.6	Traes_4AL_12911033F.6	T.aestivum v2.2	1.65e-118	86	203	+/+	seq.submitted 2021-10-26T21:06:43.164Z UTC	390	592	1	203	360.918	174	190	0	882	218
	phytozome-next.jgi.doe.gov/report/protein/Taestivum_v2_2/Traes_5BL_3A626410F.18	Traes_5BL_3A626410F.18	T.aestivum v2.2	1.97e-116	69	259	+/+	seq.submitted 2021-10-26T21:06:43.164Z UTC	624	882	33	291	358.607	180	213	0	882	292
	phytozome-next.jgi.doe.gov/report/protein/Taestivum_v2_2/Traes_5BL_3A626410F.17	Traes_5BL_3A626410F.17	T.aestivum v2.2	1.97e-116	69	259	+/+	seq.submitted 2021-10-26T21:06:43.164Z UTC	624	882	33	291	358.607	180	213	0	882	292
	phytozome-next.jgi.doe.gov/report/protein/Taestivum_v2_2/Traes_5BL_3A626410F.20	Traes_5BL_3A626410F.20	T.aestivum v2.2	5.86e-116	68	269	+/+	seq.submitted 2021-10-26T21:06:43.164Z UTC	614	882	10	277	356.681	182	216	1	882	278
	phytozome-next.jgi.doe.gov/report/protein/Taestivum_v2_2/Traes_5BL_3A626410F.19	Traes_5BL_3A626410F.19	T.aestivum v2.2	5.86e-116	68	269	+/+	seq.submitted 2021-10-26T21:06:43.164Z UTC	614	882	10	277	356.681	182	216	1	882	278
	phytozome-next.jgi.doe.gov/report/protein/Taestivum_v2_2/Traes_4AL_183973F7A.16	Traes_4AL_183973F7A.16	T.aestivum v2.2	1.25e-115	69	259	+/+	seq.submitted 2021-10-26T21:06:43.164Z UTC	624	882	33	291	356.295	180	212	0	882	292
	phytozome-next.jgi.doe.gov/report/protein/Taestivum_v2_2/Traes_4AL_183973F7A.17	Traes_4AL_183973F7A.17	T.aestivum v2.2	8.87e-113	75	224	+/+	seq.submitted 2021-10-26T21:06:43.164Z UTC	498	721	1	224	348.206	167	192	0	882	270
	phytozome-next.jgi.doe.gov/report/protein/Taestivum_v2_2/Traes_5BL_3A626410F.21	Traes_5BL_3A626410F.21	T.aestivum v2.2	3.88e-109	77	204	+/+	seq.submitted 2021-10-26T21:06:43.164Z UTC	423	626	3	206	336.265	157	184	0	882	212
	phytozome-next.jgi.doe.gov/report/protein/Taestivum_v2_2/Traes_4AL_183973F7A.18	Traes_4AL_183973F7A.18	T.aestivum v2.2	4.48e-106	68	244	+/+	seq.submitted 2021-10-26T21:06:43.164Z UTC	639	882	1	244	329.717	167	198	0	882	245
	phytozome-next.jgi.doe.gov/report/protein/Taestivum_v2_2/Traes_5DL_66DEEDDE0.17	Traes_5DL_66DEEDDE0.17	T.aestivum v2.2	1.52e-105	68	244	+/+	seq.submitted 2021-10-26T21:06:43.164Z UTC	639	882	1	244	328.176	166	198	0	882	245
	phytozome-next.jgi.doe.gov/report/protein/Taestivum_v2_2/Traes_5DL_66DEEDDE0.18	Traes_5DL_66DEEDDE0.18	T.aestivum v2.2	2.2e-89	75	192	+/+	seq.submitted 2021-10-26T21:06:43.164Z UTC	620	811	1	192	283.878	144	165	0	882	194
	phytozome-next.jgi.doe.gov/report/protein/Taestivum_v2_2/Traes_5DL_66DEEDDE0.16	Traes_5DL_66DEEDDE0.16	T.aestivum v2.2	3.31e-77	66	217	+/+	seq.submitted 2021-10-26T21:06:43.164Z UTC	205	421	40	250	253.832	143	173	6	882	260
	phytozome-next.jgi.doe.gov/report/protein/Taestivum_v2_2/Traes_3B_36B347970.6	Traes_3B_36B347970.6	T.aestivum v2.2	1.22e-68	83	134	+/+	seq.submitted 2021-10-26T21:06:43.164Z UTC	749	882	1	134	226.098	111	120	0	882	135
	phytozome-next.jgi.doe.gov/report/protein/Taestivum_v2_2/Traes_4AL_A318969AD.1	Traes_4AL_A318969AD.1	T.aestivum v2.2	7.04e-43	76	95	+/+	seq.submitted 2021-10-26T21:06:43.164Z UTC	788	882	1	95	153.295	72	82	0	882	96
	phytozome-next.jgi.doe.gov/report/protein/Taestivum_v2_2/Traes_1DS_F6A82A6D3.1	Traes_1DS_F6A82A6D3.1	T.aestivum v2.2	5.47e-41	24	682	+/+	seq.submitted 2021-10-26T21:06:43.164Z UTC	268	882	101	741	164.466	162	302	108	882	755
	phytozome-next.jgi.doe.gov/report/protein/Taestivum_v2_2/Traes_1DS_F6A82A6D3.3	Traes_1DS_F6A82A6D3.3	T.aestivum v2.2	1.19e-33	24	621	+/+	seq.submitted 2021-10-26T21:06:43.164Z UTC	327	882	1	580	140.198	151	275	106	882	594
	phytozome-next.jgi.doe.gov/report/protein/Taestivum_v2_2/Traes_1DS_F6A82A6D3.4	Traes_1DS_F6A82A6D3.4	T.aestivum v2.2	1.19e-33	24	621	+/+	seq.submitted 2021-10-26T21:06:43.164Z UTC	327	882	1	580	140.198	151	275	106	882	594
	phytozome-next.jgi.doe.gov/report/protein/Taestivum_v2_2/Traes_1DS_F6A82A6D3.2	Traes_1DS_F6A82A6D3.2	T.aestivum v2.2	1.19e-33	24	621	+/+	seq.submitted 2021-10-26T21:06:43.164Z UTC	327	882	1	580	140.198	151	275	106	882	594
	phytozome-next.jgi.doe.gov/report/protein/Taestivum_v2_2/Traes_1DS_F6A82A6D3.5	Traes_1DS_F6A82A6D3.5	T.aestivum v2.2	1.55e-33	25	603	+/+	seq.submitted 2021-10-26T21:06:43.164Z UTC	344	882	6	567	139.428	149	266	105	882	581
	phytozome-next.jgi.doe.gov/report/protein/Taestivum_v2_2/Traes_1DS_F6A82A6D3.6	Traes_1DS_F6A82A6D3.6	T.aestivum v2.2	5.58e-30	24	560	+/+	seq.submitted 2021-10-26T21:06:43.164Z UTC	379	882	32	550	128.257	137	245	97	882	564
	phytozome-next.jgi.doe.gov/report/protein/Taestivum_v2_2/Traes_1DS_F6A82A6D3.7	Traes_1DS_F6A82A6D3.7	T.aestivum v2.2	4.23e-29	25	530	+/+	seq.submitted 2021-10-26T21:06:43.164Z UTC	409	882	7	495	125.176	131	231	97	882	509
	phytozome-next.jgi.doe.gov/report/protein/Taestivum_v2_2/Traes_3B_36B347970.7	Traes_3B_36B347970.7	T.aestivum v2.2	1.84e-26	70	69	+/+	seq.submitted 2021-10-26T21:06:43.164Z UTC	814	882	1	69	105.531	48	56	0	882	70
	phytozome-next.jgi.doe.gov/report/protein/Taestivum_v2_2/Traes_1DS_F6A82A6D3.8	Traes_1DS_F6A82A6D3.8	T.aestivum v2.2	4.28e-22	25	394	+/+	seq.submitted 2021-10-26T21:06:43.164Z UTC	327	672	1	387	102.834	98	173	55	882	433
	phytozome-next.jgi.doe.gov/report/protein/Taestivum_v2_2/Traes_5BL_3A626410F.22	Traes_5BL_3A626410F.22	T.aestivum v2.2	1.75e-20	54	72	+/+	seq.submitted 2021-10-26T21:06:43.164Z UTC	811	882	11	82	88.9669	39	54	0	882	83
	phytozome-next.jgi.doe.gov/report/protein/Taestivum_v2_2/Traes_1DS_F6A82A6D3.14	Traes_1DS_F6A82A6D3.14	T.aestivum v2.2	6.3e-19	25	366	+/+	seq.submitted 2021-10-26T21:06:43.164Z UTC	352	670	1	359	92.0485	92	156	54	882	365
	phytozome-next.jgi.doe.gov/report/protein/Taestivum_v2_2/Traes_1DS_F6A82A6D3.12	Traes_1DS_F6A82A6D3.12	T.aestivum v2.2	4.78e-18	25	404	+/+	seq.submitted 2021-10-26T21:06:43.164Z UTC	535	882	3	367	89.7373	100	173	95	882	381
	phytozome-next.jgi.doe.gov/report/protein/Taestivum_v2_2/Traes_1DS_F6A82A6D3.9	Traes_1DS_F6A82A6D3.9	T.aestivum v2.2	2.54e-16	27	291	+/+	seq.submitted 2021-10-26T21:06:43.164Z UTC	609	882	122	376	84.3445	79	135	53	882	390
	phytozome-next.jgi.doe.gov/report/protein/Taestivum_v2_2/Traes_1DS_F6A82A6D3.11	Traes_1DS_F6A82A6D3.11	T.aestivum v2.2	2.54e-16	27	291	+/+	seq.submitted 2021-10-26T21:06:43.164Z UTC	609	882	122	376	84.3445	79	135	53	882	390
	Paralogs	Protein/splice variant	Species	E-value	% identity	Align len	Strands	Query ID	Query from	Query to	Target from	Target to	Bitscore
	1	Traes_3AL_033375A71.1	T.aestivum v2.2	0	80	684	+/+	seq.submitted 2021-10-26T21:06:43.164Z UTC	199	882	50	732	1096.26
		Traes_3AL_033375A71.2	T.aestivum v2.2	0	80	684	+/+	seq.submitted 2021-10-26T21:06:43.164Z UTC	199	882	1	683	1095.49
		Traes_3AL_033375A71.3	T.aestivum v2.2	0	78	684	+/+	seq.submitted 2021-10-26T21:06:43.164Z UTC	199	882	1	666	1048.88
		Traes_3AL_033375A71.4	T.aestivum v2.2	0	78	661	+/+	seq.submitted 2021-10-26T21:06:43.164Z UTC	208	839	1	660	1014.99
		Traes_3AL_033375A71.5	T.aestivum v2.2	0	75	684	+/+	seq.submitted 2021-10-26T21:06:43.164Z UTC	199	882	1	643	1006.51
		Traes_3AL_033375A71.6	T.aestivum v2.2	0	72	434	+/+	seq.submitted 2021-10-26T21:06:43.164Z UTC	453	882	169	595	631.713
		Traes_3AL_033375A71.6	T.aestivum v2.2	3.72e-93	74	224	+/+	seq.submitted 2021-10-26T21:06:43.164Z UTC	199	422	1	224	308.145
		Traes_3AL_033375A71.7	T.aestivum v2.2	0	81	493	+/+	seq.submitted 2021-10-26T21:06:43.164Z UTC	199	691	1	493	791.956
		Traes_3AL_033375A71.8	T.aestivum v2.2	0	80	428	+/+	seq.submitted 2021-10-26T21:06:43.164Z UTC	199	626	1	428	679.478
		Traes_3AL_033375A71.9	T.aestivum v2.2	0	76	428	+/+	seq.submitted 2021-10-26T21:06:43.164Z UTC	199	624	1	425	624.394
	2	Traes_3B_36B347970.1	T.aestivum v2.2	0	80	684	+/+	seq.submitted 2021-10-26T21:06:43.164Z UTC	199	882	50	732	1092.41
		Traes_3B_36B347970.2	T.aestivum v2.2	0	80	681	+/+	seq.submitted 2021-10-26T21:06:43.164Z UTC	199	879	50	729	1091.64
		Traes_3B_36B347970.3	T.aestivum v2.2	0	80	684	+/+	seq.submitted 2021-10-26T21:06:43.164Z UTC	199	882	50	732	1095.49
		Traes_3B_36B347970.4	T.aestivum v2.2	0	80	493	+/+	seq.submitted 2021-10-26T21:06:43.164Z UTC	199	691	50	542	791.571
		Traes_3B_36B347970.5	T.aestivum v2.2	0	80	427	+/+	seq.submitted 2021-10-26T21:06:43.164Z UTC	199	625	50	476	676.781
	3	Traes_3DL_DB5BAA1E4.1	T.aestivum v2.2	0	84	490	+/+	seq.submitted 2021-10-26T21:06:43.164Z UTC	390	879	1	489	847.81
		Traes_3DL_DB5BAA1E4.2	T.aestivum v2.2	0	84	493	+/+	seq.submitted 2021-10-26T21:06:43.164Z UTC	390	882	1	492	850.121
		Traes_3DL_DB5BAA1E4.3	T.aestivum v2.2	0	85	452	+/+	seq.submitted 2021-10-26T21:06:43.164Z UTC	390	841	1	451	792.341
		Traes_3DL_DB5BAA1E4.4	T.aestivum v2.2	0	82	415	+/+	seq.submitted 2021-10-26T21:06:43.164Z UTC	468	882	1	414	706.827
		Traes_3DL_DB5BAA1E4.5	T.aestivum v2.2	0	86	302	+/+	seq.submitted 2021-10-26T21:06:43.164Z UTC	390	691	1	302	545.814
		Traes_3DL_DB5BAA1E4.6	T.aestivum v2.2	0	86	302	+/+	seq.submitted 2021-10-26T21:06:43.164Z UTC	390	691	1	302	545.814
		Traes_3DL_DB5BAA1E4.7	T.aestivum v2.2	3.74e-145	87	236	+/+	seq.submitted 2021-10-26T21:06:43.164Z UTC	390	625	1	236	431.795
	4	Traes_4AL_12911033F.1	T.aestivum v2.2	0	81	362	+/+	seq.submitted 2021-10-26T21:06:43.164Z UTC	390	751	1	362	608.216
		Traes_4AL_12911033F.2	T.aestivum v2.2	0	81	356	+/+	seq.submitted 2021-10-26T21:06:43.164Z UTC	390	745	1	356	599.742
		Traes_4AL_12911033F.3	T.aestivum v2.2	0	83	333	+/+	seq.submitted 2021-10-26T21:06:43.164Z UTC	390	722	1	333	577.785
		Traes_4AL_12911033F.4	T.aestivum v2.2	2.84e-158	83	269	+/+	seq.submitted 2021-10-26T21:06:43.164Z UTC	390	658	1	269	465.692
		Traes_4AL_12911033F.5	T.aestivum v2.2	2.84e-158	83	269	+/+	seq.submitted 2021-10-26T21:06:43.164Z UTC	390	658	1	269	465.692
		Traes_4AL_12911033F.6	T.aestivum v2.2	1.65e-118	86	203	+/+	seq.submitted 2021-10-26T21:06:43.164Z UTC	390	592	1	203	360.918
	5	Traes_4AL_183973F7A.1	T.aestivum v2.2	0	68	711	+/+	seq.submitted 2021-10-26T21:06:43.164Z UTC	205	882	40	745	934.48
		Traes_4AL_183973F7A.10	T.aestivum v2.2	0	72	422	+/+	seq.submitted 2021-10-26T21:06:43.164Z UTC	205	626	40	456	598.586
		Traes_4AL_183973F7A.11	T.aestivum v2.2	0	72	422	+/+	seq.submitted 2021-10-26T21:06:43.164Z UTC	205	626	40	456	598.586
		Traes_4AL_183973F7A.12	T.aestivum v2.2	0	72	422	+/+	seq.submitted 2021-10-26T21:06:43.164Z UTC	205	626	40	456	598.586
		Traes_4AL_183973F7A.13	T.aestivum v2.2	0	69	385	+/+	seq.submitted 2021-10-26T21:06:43.164Z UTC	498	882	1	385	546.199
		Traes_4AL_183973F7A.14	T.aestivum v2.2	0	71	385	+/+	seq.submitted 2021-10-26T21:06:43.164Z UTC	498	882	1	385	565.459
		Traes_4AL_183973F7A.15	T.aestivum v2.2	0	69	385	+/+	seq.submitted 2021-10-26T21:06:43.164Z UTC	498	882	1	385	546.199
		Traes_4AL_183973F7A.16	T.aestivum v2.2	1.25e-115	69	259	+/+	seq.submitted 2021-10-26T21:06:43.164Z UTC	624	882	33	291	356.295
		Traes_4AL_183973F7A.17	T.aestivum v2.2	8.87e-113	75	224	+/+	seq.submitted 2021-10-26T21:06:43.164Z UTC	498	721	1	224	348.206
		Traes_4AL_183973F7A.18	T.aestivum v2.2	4.48e-106	68	244	+/+	seq.submitted 2021-10-26T21:06:43.164Z UTC	639	882	1	244	329.717
		Traes_4AL_183973F7A.2	T.aestivum v2.2	0	71	678	+/+	seq.submitted 2021-10-26T21:06:43.164Z UTC	205	882	40	712	950.658
		Traes_4AL_183973F7A.3	T.aestivum v2.2	0	70	678	+/+	seq.submitted 2021-10-26T21:06:43.164Z UTC	205	882	40	712	931.784
		Traes_4AL_183973F7A.4	T.aestivum v2.2	0	73	606	+/+	seq.submitted 2021-10-26T21:06:43.164Z UTC	205	810	40	640	869.381
		Traes_4AL_183973F7A.5	T.aestivum v2.2	0	72	606	+/+	seq.submitted 2021-10-26T21:06:43.164Z UTC	205	810	40	640	851.277
		Traes_4AL_183973F7A.6	T.aestivum v2.2	0	72	421	+/+	seq.submitted 2021-10-26T21:06:43.164Z UTC	205	625	40	455	599.356
		Traes_4AL_183973F7A.6	T.aestivum v2.2	1.07e-54	61	163	+/+	seq.submitted 2021-10-26T21:06:43.164Z UTC	720	882	454	616	202.986
		Traes_4AL_183973F7A.7	T.aestivum v2.2	0	73	517	+/+	seq.submitted 2021-10-26T21:06:43.164Z UTC	205	721	40	551	733.406
		Traes_4AL_183973F7A.8	T.aestivum v2.2	0	76	536	+/+	seq.submitted 2021-10-26T21:06:43.164Z UTC	275	810	14	549	838.18
		Traes_4AL_183973F7A.9	T.aestivum v2.2	0	70	429	+/+	seq.submitted 2021-10-26T21:06:43.164Z UTC	205	633	40	462	580.482
	6	Traes_5BL_3A626410F.1	T.aestivum v2.2	0	68	711	+/+	seq.submitted 2021-10-26T21:06:43.164Z UTC	205	882	40	745	934.865
		Traes_5BL_3A626410F.10	T.aestivum v2.2	0	72	422	+/+	seq.submitted 2021-10-26T21:06:43.164Z UTC	205	626	40	456	596.66
		Traes_5BL_3A626410F.11	T.aestivum v2.2	0	72	388	+/+	seq.submitted 2021-10-26T21:06:43.164Z UTC	205	592	40	422	548.125
		Traes_5BL_3A626410F.12	T.aestivum v2.2	0	69	385	+/+	seq.submitted 2021-10-26T21:06:43.164Z UTC	498	882	1	385	548.125
		Traes_5BL_3A626410F.13	T.aestivum v2.2	0	69	385	+/+	seq.submitted 2021-10-26T21:06:43.164Z UTC	498	882	1	385	548.125
		Traes_5BL_3A626410F.14	T.aestivum v2.2	0	69	385	+/+	seq.submitted 2021-10-26T21:06:43.164Z UTC	498	882	1	385	548.125
		Traes_5BL_3A626410F.15	T.aestivum v2.2	0	71	385	+/+	seq.submitted 2021-10-26T21:06:43.164Z UTC	498	882	1	385	567.385
		Traes_5BL_3A626410F.16	T.aestivum v2.2	0	69	385	+/+	seq.submitted 2021-10-26T21:06:43.164Z UTC	498	882	1	385	548.125
		Traes_5BL_3A626410F.17	T.aestivum v2.2	1.97e-116	69	259	+/+	seq.submitted 2021-10-26T21:06:43.164Z UTC	624	882	33	291	358.607
	7	Traes_5BL_3A626410F.18	T.aestivum v2.2	1.97e-116	69	259	+/+	seq.submitted 2021-10-26T21:06:43.164Z UTC	624	882	33	291	358.607
		Traes_5BL_3A626410F.19	T.aestivum v2.2	5.86e-116	68	269	+/+	seq.submitted 2021-10-26T21:06:43.164Z UTC	614	882	10	277	356.681
		Traes_5BL_3A626410F.2	T.aestivum v2.2	0	70	678	+/+	seq.submitted 2021-10-26T21:06:43.164Z UTC	205	882	40	712	932.939
		Traes_5BL_3A626410F.20	T.aestivum v2.2	5.86e-116	68	269	+/+	seq.submitted 2021-10-26T21:06:43.164Z UTC	614	882	10	277	356.681
		Traes_5BL_3A626410F.21	T.aestivum v2.2	3.88e-109	77	204	+/+	seq.submitted 2021-10-26T21:06:43.164Z UTC	423	626	3	206	336.265
		Traes_5BL_3A626410F.3	T.aestivum v2.2	0	71	678	+/+	seq.submitted 2021-10-26T21:06:43.164Z UTC	205	882	40	712	951.429
		Traes_5BL_3A626410F.4	T.aestivum v2.2	0	67	678	+/+	seq.submitted 2021-10-26T21:06:43.164Z UTC	205	882	40	677	877.085
		Traes_5BL_3A626410F.5	T.aestivum v2.2	0	76	536	+/+	seq.submitted 2021-10-26T21:06:43.164Z UTC	275	810	14	549	837.795
		Traes_5BL_3A626410F.6	T.aestivum v2.2	0	72	523	+/+	seq.submitted 2021-10-26T21:06:43.164Z UTC	360	882	1	523	774.237
		Traes_5BL_3A626410F.7	T.aestivum v2.2	0	69	427	+/+	seq.submitted 2021-10-26T21:06:43.164Z UTC	205	631	40	461	578.17
		Traes_5BL_3A626410F.8	T.aestivum v2.2	0	72	422	+/+	seq.submitted 2021-10-26T21:06:43.164Z UTC	205	626	40	456	596.66
		Traes_5BL_3A626410F.9	T.aestivum v2.2	0	70	422	+/+	seq.submitted 2021-10-26T21:06:43.164Z UTC	205	626	40	456	578.17
	8	Traes_5DL_66DEEDDE0.1	T.aestivum v2.2	0	68	711	+/+	seq.submitted 2021-10-26T21:06:43.164Z UTC	205	882	40	744	926.776
		Traes_5DL_66DEEDDE0.10	T.aestivum v2.2	0	69	429	+/+	seq.submitted 2021-10-26T21:06:43.164Z UTC	205	633	40	461	574.704
		Traes_5DL_66DEEDDE0.11	T.aestivum v2.2	0	69	429	+/+	seq.submitted 2021-10-26T21:06:43.164Z UTC	205	633	40	461	574.704
		Traes_5DL_66DEEDDE0.12	T.aestivum v2.2	0	71	427	+/+	seq.submitted 2021-10-26T21:06:43.164Z UTC	205	631	40	460	592.038
		Traes_5DL_66DEEDDE0.13	T.aestivum v2.2	0	71	385	+/+	seq.submitted 2021-10-26T21:06:43.164Z UTC	498	882	1	385	563.918
		Traes_5DL_66DEEDDE0.14	T.aestivum v2.2	0	69	385	+/+	seq.submitted 2021-10-26T21:06:43.164Z UTC	498	882	1	385	544.658
		Traes_5DL_66DEEDDE0.15	T.aestivum v2.2	1.32e-118	69	263	+/+	seq.submitted 2021-10-26T21:06:43.164Z UTC	620	882	1	263	363.229
		Traes_5DL_66DEEDDE0.17	T.aestivum v2.2	1.52e-105	68	244	+/+	seq.submitted 2021-10-26T21:06:43.164Z UTC	639	882	1	244	328.176
		Traes_5DL_66DEEDDE0.2	T.aestivum v2.2	0	71	679	+/+	seq.submitted 2021-10-26T21:06:43.164Z UTC	205	882	40	712	938.717
		Traes_5DL_66DEEDDE0.3	T.aestivum v2.2	0	70	679	+/+	seq.submitted 2021-10-26T21:06:43.164Z UTC	205	882	40	712	919.457
		Traes_5DL_66DEEDDE0.4	T.aestivum v2.2	0	70	678	+/+	seq.submitted 2021-10-26T21:06:43.164Z UTC	205	882	40	711	924.465
		Traes_5DL_66DEEDDE0.5	T.aestivum v2.2	0	70	678	+/+	seq.submitted 2021-10-26T21:06:43.164Z UTC	205	882	40	711	924.465
		Traes_5DL_66DEEDDE0.6	T.aestivum v2.2	0	71	678	+/+	seq.submitted 2021-10-26T21:06:43.164Z UTC	205	882	40	711	943.725
		Traes_5DL_66DEEDDE0.7	T.aestivum v2.2	0	71	487	+/+	seq.submitted 2021-10-26T21:06:43.164Z UTC	205	691	40	520	677.552
		Traes_5DL_66DEEDDE0.8	T.aestivum v2.2	0	72	501	+/+	seq.submitted 2021-10-26T21:06:43.164Z UTC	382	882	1	501	738.799
		Traes_5DL_66DEEDDE0.9	T.aestivum v2.2	0	69	430	+/+	seq.submitted 2021-10-26T21:06:43.164Z UTC	205	633	40	462	569.696

## Sheet: Hordeum
	Views	Protein	Species	E-value	% identity	Align len	Strands	Query ID	Query from	Query to	Target from	Target to	Bitscore	# identical	Positives	Gaps	Query len	Target len
	phytozome-next.jgi.doe.gov/report/protein/Hvulgare_r1/HORVU3Hr1G082670.4	HORVU3Hr1G082670.4	H.vulgare r1	0	80	684	+/+	seq.submitted 2021-10-26T21:08:51.859Z UTC	199	882	51	733	1093.57	548	607	1	882	734
	phytozome-next.jgi.doe.gov/report/protein/Hvulgare_r1/HORVU3Hr1G082670.10	HORVU3Hr1G082670.10	H.vulgare r1	0	80	684	+/+	seq.submitted 2021-10-26T21:08:51.859Z UTC	199	882	51	733	1093.57	548	607	1	882	734
	phytozome-next.jgi.doe.gov/report/protein/Hvulgare_r1/HORVU3Hr1G082670.3	HORVU3Hr1G082670.3	H.vulgare r1	0	80	684	+/+	seq.submitted 2021-10-26T21:08:51.859Z UTC	199	882	1	683	1092.8	548	607	1	882	684
	phytozome-next.jgi.doe.gov/report/protein/Hvulgare_r1/HORVU3Hr1G082670.2	HORVU3Hr1G082670.2	H.vulgare r1	0	80	681	+/+	seq.submitted 2021-10-26T21:08:51.859Z UTC	199	879	51	730	1090.49	547	605	1	882	739
	phytozome-next.jgi.doe.gov/report/protein/Hvulgare_r1/HORVU5Hr1G120340.17	HORVU5Hr1G120340.17	H.vulgare r1	0	70	702	+/+	seq.submitted 2021-10-26T21:08:51.859Z UTC	184	882	16	712	951.814	491	584	8	882	713
	phytozome-next.jgi.doe.gov/report/protein/Hvulgare_r1/HORVU5Hr1G120340.8	HORVU5Hr1G120340.8	H.vulgare r1	0	70	702	+/+	seq.submitted 2021-10-26T21:08:51.859Z UTC	184	882	63	759	951.814	491	584	8	882	760
	phytozome-next.jgi.doe.gov/report/protein/Hvulgare_r1/HORVU5Hr1G120340.10	HORVU5Hr1G120340.10	H.vulgare r1	0	70	702	+/+	seq.submitted 2021-10-26T21:08:51.859Z UTC	184	882	78	774	951.429	491	584	8	882	775
	phytozome-next.jgi.doe.gov/report/protein/Hvulgare_r1/HORVU5Hr1G120340.12	HORVU5Hr1G120340.12	H.vulgare r1	0	70	703	+/+	seq.submitted 2021-10-26T21:08:51.859Z UTC	184	882	78	775	947.192	491	584	9	882	776
	phytozome-next.jgi.doe.gov/report/protein/Hvulgare_r1/HORVU5Hr1G120340.7	HORVU5Hr1G120340.7	H.vulgare r1	0	67	735	+/+	seq.submitted 2021-10-26T21:08:51.859Z UTC	184	882	16	745	934.865	491	584	41	882	746
	phytozome-next.jgi.doe.gov/report/protein/Hvulgare_r1/HORVU5Hr1G120340.9	HORVU5Hr1G120340.9	H.vulgare r1	0	69	702	+/+	seq.submitted 2021-10-26T21:08:51.859Z UTC	184	882	78	774	932.939	484	578	8	882	775
	phytozome-next.jgi.doe.gov/report/protein/Hvulgare_r1/HORVU5Hr1G120340.6	HORVU5Hr1G120340.6	H.vulgare r1	0	69	702	+/+	seq.submitted 2021-10-26T21:08:51.859Z UTC	184	882	16	712	931.784	484	578	8	882	713
	phytozome-next.jgi.doe.gov/report/protein/Hvulgare_r1/HORVU5Hr1G120340.18	HORVU5Hr1G120340.18	H.vulgare r1	0	69	702	+/+	seq.submitted 2021-10-26T21:08:51.859Z UTC	184	882	16	712	931.784	484	578	8	882	713
	phytozome-next.jgi.doe.gov/report/protein/Hvulgare_r1/HORVU5Hr1G120340.15	HORVU5Hr1G120340.15	H.vulgare r1	0	70	663	+/+	seq.submitted 2021-10-26T21:08:51.859Z UTC	184	843	74	731	889.026	461	550	8	882	731
	phytozome-next.jgi.doe.gov/report/protein/Hvulgare_r1/HORVU5Hr1G120340.24	HORVU5Hr1G120340.24	H.vulgare r1	0	73	606	+/+	seq.submitted 2021-10-26T21:08:51.859Z UTC	205	810	3	603	868.996	445	518	5	882	604
	phytozome-next.jgi.doe.gov/report/protein/Hvulgare_r1/HORVU3Hr1G082670.5	HORVU3Hr1G082670.5	H.vulgare r1	0	80	493	+/+	seq.submitted 2021-10-26T21:08:51.859Z UTC	199	691	51	543	789.645	395	437	0	882	558
	phytozome-next.jgi.doe.gov/report/protein/Hvulgare_r1/HORVU3Hr1G082670.11	HORVU3Hr1G082670.11	H.vulgare r1	0	80	494	+/+	seq.submitted 2021-10-26T21:08:51.859Z UTC	199	691	79	572	785.023	395	437	1	882	587
	phytozome-next.jgi.doe.gov/report/protein/Hvulgare_r1/HORVU5Hr1G120340.3	HORVU5Hr1G120340.3	H.vulgare r1	0	72	550	+/+	seq.submitted 2021-10-26T21:08:51.859Z UTC	184	730	69	613	767.689	396	466	8	882	615
	phytozome-next.jgi.doe.gov/report/protein/Hvulgare_r1/HORVU5Hr1G120340.5	HORVU5Hr1G120340.5	H.vulgare r1	0	71	550	+/+	seq.submitted 2021-10-26T21:08:51.859Z UTC	184	730	69	613	748.043	389	460	8	882	615
	phytozome-next.jgi.doe.gov/report/protein/Hvulgare_r1/HORVU3Hr1G082670.6	HORVU3Hr1G082670.6	H.vulgare r1	0	82	415	+/+	seq.submitted 2021-10-26T21:08:51.859Z UTC	468	882	1	414	706.827	341	374	1	882	415
	phytozome-next.jgi.doe.gov/report/protein/Hvulgare_r1/HORVU3Hr1G082670.7	HORVU3Hr1G082670.7	H.vulgare r1	0	80	428	+/+	seq.submitted 2021-10-26T21:08:51.859Z UTC	199	626	135	562	680.633	341	379	0	882	564
	phytozome-next.jgi.doe.gov/report/protein/Hvulgare_r1/HORVU3Hr1G082670.9	HORVU3Hr1G082670.9	H.vulgare r1	0	80	428	+/+	seq.submitted 2021-10-26T21:08:51.859Z UTC	199	626	51	478	677.552	341	379	0	882	480
	phytozome-next.jgi.doe.gov/report/protein/Hvulgare_r1/HORVU3Hr1G082670.8	HORVU3Hr1G082670.8	H.vulgare r1	0	80	428	+/+	seq.submitted 2021-10-26T21:08:51.859Z UTC	199	626	51	478	676.396	341	379	0	882	480
	phytozome-next.jgi.doe.gov/report/protein/Hvulgare_r1/HORVU3Hr1G082670.12	HORVU3Hr1G082670.12	H.vulgare r1	0	81	386	+/+	seq.submitted 2021-10-26T21:08:51.859Z UTC	208	593	1	386	612.838	314	348	0	882	409
	phytozome-next.jgi.doe.gov/report/protein/Hvulgare_r1/HORVU5Hr1G120340.4	HORVU5Hr1G120340.4	H.vulgare r1	0	68	453	+/+	seq.submitted 2021-10-26T21:08:51.859Z UTC	184	633	69	515	583.563	308	370	9	882	522
	phytozome-next.jgi.doe.gov/report/protein/Hvulgare_r1/HORVU5Hr1G120340.23	HORVU5Hr1G120340.23	H.vulgare r1	0	68	453	+/+	seq.submitted 2021-10-26T21:08:51.859Z UTC	184	633	50	496	583.178	308	370	9	882	503
	phytozome-next.jgi.doe.gov/report/protein/Hvulgare_r1/HORVU5Hr1G120340.22	HORVU5Hr1G120340.22	H.vulgare r1	0	68	453	+/+	seq.submitted 2021-10-26T21:08:51.859Z UTC	184	633	63	509	582.793	308	370	9	882	516
	phytozome-next.jgi.doe.gov/report/protein/Hvulgare_r1/HORVU5Hr1G120340.14	HORVU5Hr1G120340.14	H.vulgare r1	0	68	453	+/+	seq.submitted 2021-10-26T21:08:51.859Z UTC	184	633	78	524	582.022	308	370	9	882	531
	phytozome-next.jgi.doe.gov/report/protein/Hvulgare_r1/HORVU5Hr1G120340.19	HORVU5Hr1G120340.19	H.vulgare r1	0	68	453	+/+	seq.submitted 2021-10-26T21:08:51.859Z UTC	184	633	16	462	581.252	308	370	9	882	469
	phytozome-next.jgi.doe.gov/report/protein/Hvulgare_r1/HORVU5Hr1G120340.13	HORVU5Hr1G120340.13	H.vulgare r1	0	71	385	+/+	seq.submitted 2021-10-26T21:08:51.859Z UTC	498	882	1	385	565.074	273	324	0	882	386
	phytozome-next.jgi.doe.gov/report/protein/Hvulgare_r1/HORVU5Hr1G120340.16	HORVU5Hr1G120340.16	H.vulgare r1	0	71	385	+/+	seq.submitted 2021-10-26T21:08:51.859Z UTC	498	882	1	385	565.074	273	324	0	882	386
	phytozome-next.jgi.doe.gov/report/protein/Hvulgare_r1/HORVU5Hr1G120340.20	HORVU5Hr1G120340.20	H.vulgare r1	0	71	385	+/+	seq.submitted 2021-10-26T21:08:51.859Z UTC	498	882	1	385	565.074	273	324	0	882	386
	phytozome-next.jgi.doe.gov/report/protein/Hvulgare_r1/HORVU5Hr1G120340.27	HORVU5Hr1G120340.27	H.vulgare r1	4.16e-147	72	300	+/+	seq.submitted 2021-10-26T21:08:51.859Z UTC	512	811	1	300	438.343	215	253	0	882	302
	phytozome-next.jgi.doe.gov/report/protein/Hvulgare_r1/HORVU5Hr1G120340.2	HORVU5Hr1G120340.2	H.vulgare r1	6.17e-144	71	339	+/+	seq.submitted 2021-10-26T21:08:51.859Z UTC	184	519	16	349	432.565	239	281	8	882	362
	phytozome-next.jgi.doe.gov/report/protein/Hvulgare_r1/HORVU5Hr1G120340.26	HORVU5Hr1G120340.26	H.vulgare r1	1.44e-137	62	331	+/+	seq.submitted 2021-10-26T21:08:51.859Z UTC	512	842	1	296	413.305	206	249	35	882	296
	phytozome-next.jgi.doe.gov/report/protein/Hvulgare_r1/HORVU5Hr1G120340.25	HORVU5Hr1G120340.25	H.vulgare r1	1.17e-101	71	223	+/+	seq.submitted 2021-10-26T21:08:51.859Z UTC	620	842	1	223	317.39	159	188	0	882	223
	phytozome-next.jgi.doe.gov/report/protein/Hvulgare_r1/HORVU5Hr1G120340.21	HORVU5Hr1G120340.21	H.vulgare r1	4.64e-90	63	269	+/+	seq.submitted 2021-10-26T21:08:51.859Z UTC	176	441	60	323	291.582	170	209	8	882	348
	phytozome-next.jgi.doe.gov/report/protein/Hvulgare_r1/HORVU5Hr1G120340.11	HORVU5Hr1G120340.11	H.vulgare r1	3.21e-79	62	249	+/+	seq.submitted 2021-10-26T21:08:51.859Z UTC	176	421	70	313	261.536	154	191	8	882	323
	phytozome-next.jgi.doe.gov/report/protein/Hvulgare_r1/HORVU1Hr1G031010.40	HORVU1Hr1G031010.40	H.vulgare r1	1.27e-39	23	678	+/+	seq.submitted 2021-10-26T21:08:51.859Z UTC	268	882	144	784	160.614	157	293	100	882	798
	phytozome-next.jgi.doe.gov/report/protein/Hvulgare_r1/HORVU1Hr1G031010.16	HORVU1Hr1G031010.16	H.vulgare r1	1.8e-39	23	675	+/+	seq.submitted 2021-10-26T21:08:51.859Z UTC	268	879	101	738	159.458	156	292	100	882	739
	phytozome-next.jgi.doe.gov/report/protein/Hvulgare_r1/HORVU1Hr1G031010.30	HORVU1Hr1G031010.30	H.vulgare r1	3.11e-39	23	678	+/+	seq.submitted 2021-10-26T21:08:51.859Z UTC	268	882	258	898	159.844	157	293	100	882	912
	phytozome-next.jgi.doe.gov/report/protein/Hvulgare_r1/HORVU1Hr1G031010.13	HORVU1Hr1G031010.13	H.vulgare r1	4.38e-39	23	678	+/+	seq.submitted 2021-10-26T21:08:51.859Z UTC	268	882	277	917	159.458	157	293	100	882	931
	phytozome-next.jgi.doe.gov/report/protein/Hvulgare_r1/HORVU1Hr1G031010.20	HORVU1Hr1G031010.20	H.vulgare r1	1.48e-37	23	663	+/+	seq.submitted 2021-10-26T21:08:51.859Z UTC	268	866	258	883	154.451	154	286	101	882	889
	phytozome-next.jgi.doe.gov/report/protein/Hvulgare_r1/HORVU1Hr1G031010.6	HORVU1Hr1G031010.6	H.vulgare r1	1.4e-30	23	613	+/+	seq.submitted 2021-10-26T21:08:51.859Z UTC	268	817	284	861	132.109	140	261	98	882	877
	phytozome-next.jgi.doe.gov/report/protein/Hvulgare_r1/HORVU1Hr1G031010.38	HORVU1Hr1G031010.38	H.vulgare r1	1.73e-30	23	613	+/+	seq.submitted 2021-10-26T21:08:51.859Z UTC	268	817	237	814	131.724	140	261	98	882	830
	phytozome-next.jgi.doe.gov/report/protein/Hvulgare_r1/HORVU1Hr1G031010.18	HORVU1Hr1G031010.18	H.vulgare r1	2.3e-28	24	455	+/+	seq.submitted 2021-10-26T21:08:51.859Z UTC	268	672	277	724	124.79	107	197	57	882	799
	phytozome-next.jgi.doe.gov/report/protein/Hvulgare_r1/HORVU1Hr1G031010.15	HORVU1Hr1G031010.15	H.vulgare r1	2.8e-28	24	455	+/+	seq.submitted 2021-10-26T21:08:51.859Z UTC	268	672	280	727	124.79	107	197	57	882	840
	phytozome-next.jgi.doe.gov/report/protein/Hvulgare_r1/HORVU1Hr1G031010.22	HORVU1Hr1G031010.22	H.vulgare r1	7.58e-28	24	455	+/+	seq.submitted 2021-10-26T21:08:51.859Z UTC	268	670	256	701	122.865	110	196	61	882	714
	phytozome-next.jgi.doe.gov/report/protein/Hvulgare_r1/HORVU1Hr1G031010.11	HORVU1Hr1G031010.11	H.vulgare r1	9.69e-28	24	455	+/+	seq.submitted 2021-10-26T21:08:51.859Z UTC	268	670	277	722	122.865	110	196	61	882	735
	phytozome-next.jgi.doe.gov/report/protein/Hvulgare_r1/HORVU1Hr1G031010.23	HORVU1Hr1G031010.23	H.vulgare r1	9.77e-28	24	455	+/+	seq.submitted 2021-10-26T21:08:51.859Z UTC	268	670	256	701	122.479	110	196	61	882	714
	phytozome-next.jgi.doe.gov/report/protein/Hvulgare_r1/HORVU1Hr1G031010.39	HORVU1Hr1G031010.39	H.vulgare r1	1.54e-24	25	442	+/+	seq.submitted 2021-10-26T21:08:51.859Z UTC	493	882	2	408	109.768	109	187	87	882	409
	phytozome-next.jgi.doe.gov/report/protein/Hvulgare_r1/HORVU1Hr1G031010.8	HORVU1Hr1G031010.8	H.vulgare r1	3.51e-24	24	422	+/+	seq.submitted 2021-10-26T21:08:51.859Z UTC	268	637	279	693	111.309	100	181	59	882	693
	phytozome-next.jgi.doe.gov/report/protein/Hvulgare_r1/HORVU1Hr1G031010.7	HORVU1Hr1G031010.7	H.vulgare r1	3.7e-24	24	422	+/+	seq.submitted 2021-10-26T21:08:51.859Z UTC	268	637	282	696	111.309	100	181	59	882	696
	phytozome-next.jgi.doe.gov/report/protein/Hvulgare_r1/HORVU1Hr1G031010.4	HORVU1Hr1G031010.4	H.vulgare r1	4.38e-23	24	323	+/+	seq.submitted 2021-10-26T21:08:51.859Z UTC	268	579	284	601	108.227	78	154	16	882	940
	phytozome-next.jgi.doe.gov/report/protein/Hvulgare_r1/HORVU1Hr1G031010.4	HORVU1Hr1G031010.4	H.vulgare r1	4.62e-13	27	271	+/+	seq.submitted 2021-10-26T21:08:51.859Z UTC	609	866	696	934	75.8702	73	122	45	882	940
	phytozome-next.jgi.doe.gov/report/protein/Hvulgare_r1/HORVU1Hr1G031010.12	HORVU1Hr1G031010.12	H.vulgare r1	2.19e-17	23	290	+/+	seq.submitted 2021-10-26T21:08:51.859Z UTC	268	546	101	388	87.8113	66	133	13	882	407
	phytozome-next.jgi.doe.gov/report/protein/Hvulgare_r1/HORVU1Hr1G031010.24	HORVU1Hr1G031010.24	H.vulgare r1	2.19e-17	23	290	+/+	seq.submitted 2021-10-26T21:08:51.859Z UTC	268	546	101	388	87.8113	66	133	13	882	407
	phytozome-next.jgi.doe.gov/report/protein/Hvulgare_r1/HORVU1Hr1G031010.17	HORVU1Hr1G031010.17	H.vulgare r1	4.31e-17	23	282	+/+	seq.submitted 2021-10-26T21:08:51.859Z UTC	268	538	278	557	88.1965	64	131	13	882	584
	phytozome-next.jgi.doe.gov/report/protein/Hvulgare_r1/HORVU1Hr1G031010.43	HORVU1Hr1G031010.43	H.vulgare r1	1.12e-16	24	400	+/+	seq.submitted 2021-10-26T21:08:51.859Z UTC	535	882	3	367	85.5001	96	166	87	882	381
	phytozome-next.jgi.doe.gov/report/protein/Hvulgare_r1/HORVU1Hr1G031010.3	HORVU1Hr1G031010.3	H.vulgare r1	1.67e-15	24	384	+/+	seq.submitted 2021-10-26T21:08:51.859Z UTC	535	866	3	351	81.6481	93	159	87	882	357
	phytozome-next.jgi.doe.gov/report/protein/Hvulgare_r1/HORVU1Hr1G031010.28	HORVU1Hr1G031010.28	H.vulgare r1	4.08e-15	26	287	+/+	seq.submitted 2021-10-26T21:08:51.859Z UTC	609	882	122	376	80.8777	76	129	45	882	390
	phytozome-next.jgi.doe.gov/report/protein/Hvulgare_r1/HORVU1Hr1G031010.2	HORVU1Hr1G031010.2	H.vulgare r1	6.48e-14	22	260	+/+	seq.submitted 2021-10-26T21:08:51.859Z UTC	268	516	101	358	77.0258	57	121	13	882	388
	phytozome-next.jgi.doe.gov/report/protein/Hvulgare_r1/HORVU1Hr1G031010.1	HORVU1Hr1G031010.1	H.vulgare r1	6.97e-14	22	260	+/+	seq.submitted 2021-10-26T21:08:51.859Z UTC	268	516	290	547	78.1814	57	121	13	882	577
	phytozome-next.jgi.doe.gov/report/protein/Hvulgare_r1/HORVU1Hr1G031010.5	HORVU1Hr1G031010.5	H.vulgare r1	7.9e-14	22	260	+/+	seq.submitted 2021-10-26T21:08:51.859Z UTC	268	516	284	541	77.7962	57	121	13	882	571
	phytozome-next.jgi.doe.gov/report/protein/Hvulgare_r1/HORVU1Hr1G031010.21	HORVU1Hr1G031010.21	H.vulgare r1	8.02e-14	22	260	+/+	seq.submitted 2021-10-26T21:08:51.859Z UTC	268	516	258	515	77.7962	57	121	13	882	545
	phytozome-next.jgi.doe.gov/report/protein/Hvulgare_r1/HORVU1Hr1G031010.25	HORVU1Hr1G031010.25	H.vulgare r1	8.11e-14	22	260	+/+	seq.submitted 2021-10-26T21:08:51.859Z UTC	268	516	259	516	77.7962	57	121	13	882	546
	phytozome-next.jgi.doe.gov/report/protein/Hvulgare_r1/HORVU1Hr1G031010.29	HORVU1Hr1G031010.29	H.vulgare r1	8.45e-14	22	260	+/+	seq.submitted 2021-10-26T21:08:51.859Z UTC	268	516	258	515	77.7962	57	121	13	882	545
	phytozome-next.jgi.doe.gov/report/protein/Hvulgare_r1/HORVU1Hr1G031010.14	HORVU1Hr1G031010.14	H.vulgare r1	1e-13	22	260	+/+	seq.submitted 2021-10-26T21:08:51.859Z UTC	268	516	277	534	77.411	57	121	13	882	564
	phytozome-next.jgi.doe.gov/report/protein/Hvulgare_r1/HORVU1Hr1G031010.37	HORVU1Hr1G031010.37	H.vulgare r1	1.03e-13	22	260	+/+	seq.submitted 2021-10-26T21:08:51.859Z UTC	268	516	234	491	77.411	57	121	13	882	521
	phytozome-next.jgi.doe.gov/report/protein/Hvulgare_r1/HORVU1Hr1G031010.35	HORVU1Hr1G031010.35	H.vulgare r1	1.14e-13	22	260	+/+	seq.submitted 2021-10-26T21:08:51.859Z UTC	268	516	236	493	77.0258	57	121	13	882	523
	phytozome-next.jgi.doe.gov/report/protein/Hvulgare_r1/HORVU1Hr1G031010.36	HORVU1Hr1G031010.36	H.vulgare r1	1.37e-13	22	257	+/+	seq.submitted 2021-10-26T21:08:51.859Z UTC	273	516	42	296	75.485	56	121	15	882	326
	phytozome-next.jgi.doe.gov/report/protein/Hvulgare_r1/HORVU1Hr1G031010.44	HORVU1Hr1G031010.44	H.vulgare r1	2.1e-13	27	217	+/+	seq.submitted 2021-10-26T21:08:51.859Z UTC	493	670	2	213	72.7886	58	90	44	882	226
	phytozome-next.jgi.doe.gov/report/protein/Hvulgare_r1/HORVU5Hr1G120340.28	HORVU5Hr1G120340.28	H.vulgare r1	1.36e-11	60	48	+/+	seq.submitted 2021-10-26T21:08:51.859Z UTC	835	882	1	48	62.3882	29	35	0	882	49
	phytozome-next.jgi.doe.gov/report/protein/Hvulgare_r1/HORVU1Hr1G031010.50	HORVU1Hr1G031010.50	H.vulgare r1	1.2e-10	25	273	+/+	seq.submitted 2021-10-26T21:08:51.859Z UTC	623	882	1	241	65.4698	68	121	45	882	255
	phytozome-next.jgi.doe.gov/report/protein/Hvulgare_r1/HORVU1Hr1G031010.19	HORVU1Hr1G031010.19	H.vulgare r1	2.49e-09	25	257	+/+	seq.submitted 2021-10-26T21:08:51.859Z UTC	623	866	1	225	60.8474	65	114	45	882	231
	phytozome-next.jgi.doe.gov/report/protein/Hvulgare_r1/HORVU1Hr1G031010.9	HORVU1Hr1G031010.9	H.vulgare r1	8.85e-09	21	200	+/+	seq.submitted 2021-10-26T21:08:51.859Z UTC	268	456	282	481	61.6178	42	95	11	882	494
	phytozome-next.jgi.doe.gov/report/protein/Hvulgare_r1/HORVU1Hr1G031010.31	HORVU1Hr1G031010.31	H.vulgare r1	1.04e-08	21	200	+/+	seq.submitted 2021-10-26T21:08:51.859Z UTC	268	456	257	456	61.2326	42	95	11	882	469
	phytozome-next.jgi.doe.gov/report/protein/Hvulgare_r1/HORVU1Hr1G031010.26	HORVU1Hr1G031010.26	H.vulgare r1	1.09e-08	21	200	+/+	seq.submitted 2021-10-26T21:08:51.859Z UTC	268	456	256	455	61.2326	42	95	11	882	468
	phytozome-next.jgi.doe.gov/report/protein/Hvulgare_r1/HORVU1Hr1G031010.34	HORVU1Hr1G031010.34	H.vulgare r1	1.19e-08	21	200	+/+	seq.submitted 2021-10-26T21:08:51.859Z UTC	268	456	236	435	60.8474	42	95	11	882	448
	phytozome-next.jgi.doe.gov/report/protein/Hvulgare_r1/HORVU1Hr1G031010.41	HORVU1Hr1G031010.41	H.vulgare r1	4.5e-08	21	179	+/+	seq.submitted 2021-10-26T21:08:51.859Z UTC	268	435	101	279	58.151	38	87	11	882	311
	phytozome-next.jgi.doe.gov/report/protein/Hvulgare_r1/HORVU1Hr1G031010.47	HORVU1Hr1G031010.47	H.vulgare r1	9.46e-08	26	200	+/+	seq.submitted 2021-10-26T21:08:51.859Z UTC	514	672	4	198	56.9954	52	82	46	882	273
	phytozome-next.jgi.doe.gov/report/protein/Hvulgare_r1/HORVU1Hr1G031010.48	HORVU1Hr1G031010.48	H.vulgare r1	2.63e-07	26	198	+/+	seq.submitted 2021-10-26T21:08:51.859Z UTC	514	670	4	196	54.6842	51	81	46	882	209
	phytozome-next.jgi.doe.gov/report/protein/Hvulgare_r1/HORVU1Hr1G031010.42	HORVU1Hr1G031010.42	H.vulgare r1	1.24e-06	23	199	+/+	seq.submitted 2021-10-26T21:08:51.859Z UTC	327	516	1	197	52.7582	46	94	11	882	227
	phytozome-next.jgi.doe.gov/report/protein/Hvulgare_r1/HORVU1Hr1G031010.10	HORVU1Hr1G031010.10	H.vulgare r1	1.24e-06	23	199	+/+	seq.submitted 2021-10-26T21:08:51.859Z UTC	327	516	1	197	52.7582	46	94	11	882	227
	phytozome-next.jgi.doe.gov/report/protein/Hvulgare_r1/HORVU1Hr1G031010.32	HORVU1Hr1G031010.32	H.vulgare r1	5.24e-05	22	103	+/+	seq.submitted 2021-10-26T21:08:51.859Z UTC	268	367	254	356	48.9062	23	53	3	882	373
	phytozome-next.jgi.doe.gov/report/protein/Hvulgare_r1/HORVU1Hr1G031010.49	HORVU1Hr1G031010.49	H.vulgare r1	0.000275	41	64	+/+	seq.submitted 2021-10-26T21:08:51.859Z UTC	609	672	122	183	46.2098	26	33	2	882	258
	phytozome-next.jgi.doe.gov/report/protein/Hvulgare_r1/HORVU1Hr1G031010.46	HORVU1Hr1G031010.46	H.vulgare r1	0.000344	41	64	+/+	seq.submitted 2021-10-26T21:08:51.859Z UTC	609	672	122	183	45.8246	26	33	2	882	269
	phytozome-next.jgi.doe.gov/report/protein/Hvulgare_r1/HORVU1Hr1G031010.33	HORVU1Hr1G031010.33	H.vulgare r1	0.000345	41	64	+/+	seq.submitted 2021-10-26T21:08:51.859Z UTC	609	672	122	183	45.8246	26	33	2	882	268
	phytozome-next.jgi.doe.gov/report/protein/Hvulgare_r1/HORVU1Hr1G031010.27	HORVU1Hr1G031010.27	H.vulgare r1	0.000411	41	64	+/+	seq.submitted 2021-10-26T21:08:51.859Z UTC	609	672	122	183	45.8246	26	33	2	882	297
	Paralogs	Protein/splice variant	Species	E-value	% identity	Align len	Strands	Query ID	Query from	Query to	Target from	Target to	Bitscore
	1	HORVU3Hr1G082670.10	H.vulgare r1	0	80	684	+/+	seq.submitted 2021-10-26T21:08:51.859Z UTC	199	882	51	733	1093.57
		HORVU3Hr1G082670.11	H.vulgare r1	0	80	494	+/+	seq.submitted 2021-10-26T21:08:51.859Z UTC	199	691	79	572	785.023
		HORVU3Hr1G082670.12	H.vulgare r1	0	81	386	+/+	seq.submitted 2021-10-26T21:08:51.859Z UTC	208	593	1	386	612.838
		HORVU3Hr1G082670.2	H.vulgare r1	0	80	681	+/+	seq.submitted 2021-10-26T21:08:51.859Z UTC	199	879	51	730	1090.49
		HORVU3Hr1G082670.3	H.vulgare r1	0	80	684	+/+	seq.submitted 2021-10-26T21:08:51.859Z UTC	199	882	1	683	1092.8
		HORVU3Hr1G082670.4	H.vulgare r1	0	80	684	+/+	seq.submitted 2021-10-26T21:08:51.859Z UTC	199	882	51	733	1093.57
		HORVU3Hr1G082670.5	H.vulgare r1	0	80	493	+/+	seq.submitted 2021-10-26T21:08:51.859Z UTC	199	691	51	543	789.645
		HORVU3Hr1G082670.6	H.vulgare r1	0	82	415	+/+	seq.submitted 2021-10-26T21:08:51.859Z UTC	468	882	1	414	706.827
		HORVU3Hr1G082670.7	H.vulgare r1	0	80	428	+/+	seq.submitted 2021-10-26T21:08:51.859Z UTC	199	626	135	562	680.633
		HORVU3Hr1G082670.8	H.vulgare r1	0	80	428	+/+	seq.submitted 2021-10-26T21:08:51.859Z UTC	199	626	51	478	676.396
		HORVU3Hr1G082670.9	H.vulgare r1	0	80	428	+/+	seq.submitted 2021-10-26T21:08:51.859Z UTC	199	626	51	478	677.552
	2	HORVU5Hr1G120340.10	H.vulgare r1	0	70	702	+/+	seq.submitted 2021-10-26T21:08:51.859Z UTC	184	882	78	774	951.429
		HORVU5Hr1G120340.12	H.vulgare r1	0	70	703	+/+	seq.submitted 2021-10-26T21:08:51.859Z UTC	184	882	78	775	947.192
		HORVU5Hr1G120340.13	H.vulgare r1	0	71	385	+/+	seq.submitted 2021-10-26T21:08:51.859Z UTC	498	882	1	385	565.074
		HORVU5Hr1G120340.14	H.vulgare r1	0	68	453	+/+	seq.submitted 2021-10-26T21:08:51.859Z UTC	184	633	78	524	582.022
		HORVU5Hr1G120340.15	H.vulgare r1	0	70	663	+/+	seq.submitted 2021-10-26T21:08:51.859Z UTC	184	843	74	731	889.026
		HORVU5Hr1G120340.16	H.vulgare r1	0	71	385	+/+	seq.submitted 2021-10-26T21:08:51.859Z UTC	498	882	1	385	565.074
		HORVU5Hr1G120340.17	H.vulgare r1	0	70	702	+/+	seq.submitted 2021-10-26T21:08:51.859Z UTC	184	882	16	712	951.814
		HORVU5Hr1G120340.18	H.vulgare r1	0	69	702	+/+	seq.submitted 2021-10-26T21:08:51.859Z UTC	184	882	16	712	931.784
		HORVU5Hr1G120340.19	H.vulgare r1	0	68	453	+/+	seq.submitted 2021-10-26T21:08:51.859Z UTC	184	633	16	462	581.252
		HORVU5Hr1G120340.2	H.vulgare r1	6.17e-144	71	339	+/+	seq.submitted 2021-10-26T21:08:51.859Z UTC	184	519	16	349	432.565
		HORVU5Hr1G120340.20	H.vulgare r1	0	71	385	+/+	seq.submitted 2021-10-26T21:08:51.859Z UTC	498	882	1	385	565.074
		HORVU5Hr1G120340.22	H.vulgare r1	0	68	453	+/+	seq.submitted 2021-10-26T21:08:51.859Z UTC	184	633	63	509	582.793
		HORVU5Hr1G120340.23	H.vulgare r1	0	68	453	+/+	seq.submitted 2021-10-26T21:08:51.859Z UTC	184	633	50	496	583.178
		HORVU5Hr1G120340.24	H.vulgare r1	0	73	606	+/+	seq.submitted 2021-10-26T21:08:51.859Z UTC	205	810	3	603	868.996
		HORVU5Hr1G120340.25	H.vulgare r1	1.17e-101	71	223	+/+	seq.submitted 2021-10-26T21:08:51.859Z UTC	620	842	1	223	317.39
		HORVU5Hr1G120340.26	H.vulgare r1	1.44e-137	62	331	+/+	seq.submitted 2021-10-26T21:08:51.859Z UTC	512	842	1	296	413.305
		HORVU5Hr1G120340.27	H.vulgare r1	4.16e-147	72	300	+/+	seq.submitted 2021-10-26T21:08:51.859Z UTC	512	811	1	300	438.343
		HORVU5Hr1G120340.3	H.vulgare r1	0	72	550	+/+	seq.submitted 2021-10-26T21:08:51.859Z UTC	184	730	69	613	767.689
		HORVU5Hr1G120340.4	H.vulgare r1	0	68	453	+/+	seq.submitted 2021-10-26T21:08:51.859Z UTC	184	633	69	515	583.563
		HORVU5Hr1G120340.5	H.vulgare r1	0	71	550	+/+	seq.submitted 2021-10-26T21:08:51.859Z UTC	184	730	69	613	748.043
		HORVU5Hr1G120340.6	H.vulgare r1	0	69	702	+/+	seq.submitted 2021-10-26T21:08:51.859Z UTC	184	882	16	712	931.784
		HORVU5Hr1G120340.7	H.vulgare r1	0	67	735	+/+	seq.submitted 2021-10-26T21:08:51.859Z UTC	184	882	16	745	934.865
		HORVU5Hr1G120340.8	H.vulgare r1	0	70	702	+/+	seq.submitted 2021-10-26T21:08:51.859Z UTC	184	882	63	759	951.814
		HORVU5Hr1G120340.9	H.vulgare r1	0	69	702	+/+	seq.submitted 2021-10-26T21:08:51.859Z UTC	184	882	78	774	932.939

## Sheet: Sorghum
	Views	Protein	Species	E-value	% identity	Align len	Strands	Query ID	Query from	Query to	Target from	Target to	Bitscore	# identical	Positives	Gaps	Query len	Target len
	phytozome-next.jgi.doe.gov/report/protein/Sbicolor_v3_1_1/Sobic.003G370200.1.p	Sobic.003G370200.1.p	S.bicolor v3.1.1	0	76	759	+/+	seq.submitted 2021-10-26T21:10:51.173Z UTC	129	882	200	955	1113.6	574	641	8	882	956
	phytozome-next.jgi.doe.gov/report/protein/Sbicolor_v3_1_1/Sobic.001G016700.2.p	Sobic.001G016700.2.p	S.bicolor v3.1.1	0	72	678	+/+	seq.submitted 2021-10-26T21:10:51.173Z UTC	205	882	222	894	978.008	491	582	5	882	895
	phytozome-next.jgi.doe.gov/report/protein/Sbicolor_v3_1_1/Sobic.001G016700.1.p	Sobic.001G016700.1.p	S.bicolor v3.1.1	0	72	678	+/+	seq.submitted 2021-10-26T21:10:51.173Z UTC	205	882	222	894	966.452	486	578	5	882	895
	phytozome-next.jgi.doe.gov/report/protein/Sbicolor_v3_1_1/Sobic.003G370200.2.p	Sobic.003G370200.2.p	S.bicolor v3.1.1	0	74	568	+/+	seq.submitted 2021-10-26T21:10:51.173Z UTC	129	691	200	765	811.987	421	470	7	882	768
	phytozome-next.jgi.doe.gov/report/protein/Sbicolor_v3_1_1/Sobic.001G495300.1.p	Sobic.001G495300.1.p	S.bicolor v3.1.1	1.48e-43	24	680	+/+	seq.submitted 2021-10-26T21:10:51.173Z UTC	268	882	216	856	171.014	166	306	104	882	877
	Paralogs	Protein/splice variant	Species	E-value	% identity	Align len	Strands	Query ID	Query from	Query to	Target from	Target to	Bitscore
	1	Sobic.001G016700.1.p	S.bicolor v3.1.1	0	72	678	+/+	seq.submitted 2021-10-26T21:10:51.173Z UTC	205	882	222	894	966.452
		Sobic.001G016700.2.p	S.bicolor v3.1.1	0	72	678	+/+	seq.submitted 2021-10-26T21:10:51.173Z UTC	205	882	222	894	978.008
	2	Sobic.003G370200.1.p	S.bicolor v3.1.1	0	76	759	+/+	seq.submitted 2021-10-26T21:10:51.173Z UTC	129	882	200	955	1113.6
		Sobic.003G370200.2.p	S.bicolor v3.1.1	0	74	568	+/+	seq.submitted 2021-10-26T21:10:51.173Z UTC	129	691	200	765	811.987

## Sheet: Brassica
	Views	Protein	Species	E-value	% identity	Align len	Strands	Query ID	Query from	Query to	Target from	Target to	Bitscore	# identical	Positives	Gaps	Query len	Target len
	phytozome-next.jgi.doe.gov/report/protein/BrapaFPsc_v1_3/Brara.B01595.1.p	Brara.B01595.1.p	B.rapaFPsc v1.3	0	72	758	+/+	seq.submitted 2021-10-26T22:19:57.775Z UTC	127	882	90	825	1068.14	547	632	24	882	826
	phytozome-next.jgi.doe.gov/report/protein/BrapaFPsc_v1_3/Brara.I04567.1.p	Brara.I04567.1.p	B.rapaFPsc v1.3	3.8e-50	24	663	+/+	seq.submitted 2021-10-26T22:19:57.775Z UTC	279	882	186	802	190.66	159	305	105	882	810
	phytozome-next.jgi.doe.gov/report/protein/BrapaFPsc_v1_3/Brara.B02426.1.p	Brara.B02426.1.p	B.rapaFPsc v1.3	6.22e-45	22	662	+/+	seq.submitted 2021-10-26T22:19:57.775Z UTC	280	882	191	807	174.866	148	291	104	882	815
	Paralogs	Protein/splice variant	Species	E-value	% identity	Align len	Strands	Query ID	Query from	Query to	Target from	Target to	Bitscore
	1	Brara.B01595.1.p	B.rapaFPsc v1.3	0	72	758	+/+	seq.submitted 2021-10-26T22:19:57.775Z UTC	127	882	90	825	1068.14

## Sheet: Beta
	Views	Protein	Species	E-value	% identity	Align len	Strands	Query ID	Query from	Query to	Target from	Target to	Bitscore	# identical	Positives	Gaps	Query len	Target len
	phytozome-next.jgi.doe.gov/report/protein/Bvulgaris_EL10_1_0/EL10Ac6g14174.1	EL10Ac6g14174.1	B.vulgaris EL10_1.0	0	81	692	+/+	seq.submitted 2021-10-26T21:13:32.472Z UTC	187	877	114	805	1132.86	558	632	1	882	935
	phytozome-next.jgi.doe.gov/report/protein/Bvulgaris_EL10_1_0/EL10Ac4g09514.1	EL10Ac4g09514.1	B.vulgaris EL10_1.0	1.82e-46	23	682	+/+	seq.submitted 2021-10-26T21:13:32.472Z UTC	268	882	237	875	179.104	158	309	110	882	884
	Paralogs	Protein/splice variant	Species	E-value	% identity	Align len	Strands	Query ID	Query from	Query to	Target from	Target to	Bitscore
	1	EL10Ac6g14174.1	B.vulgaris EL10_1.0	0	81	692	+/+	seq.submitted 2021-10-26T21:13:32.472Z UTC	187	877	114	805	1132.86

[truncated: 2 more sheets: S. lycopersicum, S. tuberosum]
