# Supplementary material for: Glycine max Homologs of DOESN'T MAKE INFECTIONS 1, 2, and 3 Function to Impair Heterodera glycines Parasitism While Also Regulating Mitogen Activated Protein Kinase Expression
Source: Front Plant Sci. 2022 May 4;13:842597. doi: 10.3389/fpls.2022.842597 (PMC9114929; doi:10.3389/fpls.2022.842597)
Supplement: Supplementary Table 5 — DMI2 homologs that exist in select agriculturally important crops (Tilman et al., 2011; Ray et al., 2013, 2019). Values not in parentheses have a Blast of e-0. Numbers in parentheses have a Blast cutoff of > e-0. Please refer to Materials and Methods subsections: G. max DMI gene identification, and Proteome mining, for details. [file Table_5.xlsx]

## Sheet: Glycine
	Views	Protein	Species	E-value	% identity	Align len	Strands	Query ID	Query from	Query to	Target from	Target to	Bitscore	# identical	Positives	Gaps	Query len	Target len
	phytozome-next.jgi.doe.gov/report/protein/Gmax_Wm82_a2_v1/Glyma.01G020100.1.p	Glyma.01G020100.1.p	G.max Wm82.a2.v1	0	80	927	+/+	seq.submitted 2021-10-27T13:58:52.302Z UTC	1	925	1	919	1388.25	741	817	10	925	920
	phytozome-next.jgi.doe.gov/report/protein/Gmax_Wm82_a2_v1/Glyma.09G202300.1.p	Glyma.09G202300.1.p	G.max Wm82.a2.v1	0	79	927	+/+	seq.submitted 2021-10-27T13:58:52.302Z UTC	1	925	1	919	1382.47	731	811	10	925	920
	phytozome-next.jgi.doe.gov/report/protein/Gmax_Wm82_a2_v1/Glyma.09G202300.2.p	Glyma.09G202300.2.p	G.max Wm82.a2.v1	0	75	708	+/+	seq.submitted 2021-10-27T13:58:52.302Z UTC	1	706	1	700	989.178	528	600	10	925	705
	phytozome-next.jgi.doe.gov/report/protein/Gmax_Wm82_a2_v1/Glyma.05G144400.1.p	Glyma.05G144400.1.p	G.max Wm82.a2.v1	6.83e-127	34	909	+/+	seq.submitted 2021-10-27T13:58:52.302Z UTC	16	883	7	890	407.527	313	469	66	925	932
	phytozome-next.jgi.doe.gov/report/protein/Gmax_Wm82_a2_v1/Glyma.18G011000.1.p	Glyma.18G011000.1.p	G.max Wm82.a2.v1	1.52e-124	35	852	+/+	seq.submitted 2021-10-27T13:58:52.302Z UTC	84	891	74	899	400.979	301	442	70	925	930
	phytozome-next.jgi.doe.gov/report/protein/Gmax_Wm82_a2_v1/Glyma.11G246200.4.p	Glyma.11G246200.4.p	G.max Wm82.a2.v1	9.31e-124	35	854	+/+	seq.submitted 2021-10-27T13:58:52.302Z UTC	84	893	23	850	397.512	298	442	70	925	880
	phytozome-next.jgi.doe.gov/report/protein/Gmax_Wm82_a2_v1/Glyma.11G246200.5.p	Glyma.11G246200.5.p	G.max Wm82.a2.v1	9.31e-124	35	854	+/+	seq.submitted 2021-10-27T13:58:52.302Z UTC	84	893	23	850	397.512	298	442	70	925	880
	phytozome-next.jgi.doe.gov/report/protein/Gmax_Wm82_a2_v1/Glyma.11G246200.1.p	Glyma.11G246200.1.p	G.max Wm82.a2.v1	3.57e-123	35	854	+/+	seq.submitted 2021-10-27T13:58:52.302Z UTC	84	893	74	901	397.512	298	442	70	925	931
	phytozome-next.jgi.doe.gov/report/protein/Gmax_Wm82_a2_v1/Glyma.13G136700.2.p	Glyma.13G136700.2.p	G.max Wm82.a2.v1	4.18e-123	34	859	+/+	seq.submitted 2021-10-27T13:58:52.302Z UTC	60	878	52	884	397.127	296	435	66	925	926
	phytozome-next.jgi.doe.gov/report/protein/Gmax_Wm82_a2_v1/Glyma.13G136700.3.p	Glyma.13G136700.3.p	G.max Wm82.a2.v1	4.18e-123	34	859	+/+	seq.submitted 2021-10-27T13:58:52.302Z UTC	60	878	52	884	397.127	296	435	66	925	926
	phytozome-next.jgi.doe.gov/report/protein/Gmax_Wm82_a2_v1/Glyma.13G136700.1.p	Glyma.13G136700.1.p	G.max Wm82.a2.v1	5.99e-123	34	859	+/+	seq.submitted 2021-10-27T13:58:52.302Z UTC	60	878	77	909	397.512	296	435	66	925	951
	phytozome-next.jgi.doe.gov/report/protein/Gmax_Wm82_a2_v1/Glyma.08G100800.1.p	Glyma.08G100800.1.p	G.max Wm82.a2.v1	2.8e-122	35	837	+/+	seq.submitted 2021-10-27T13:58:52.302Z UTC	84	883	75	892	395.201	292	437	56	925	934
	phytozome-next.jgi.doe.gov/report/protein/Gmax_Wm82_a2_v1/Glyma.10G048800.1.p	Glyma.10G048800.1.p	G.max Wm82.a2.v1	3.61e-121	35	859	+/+	seq.submitted 2021-10-27T13:58:52.302Z UTC	60	878	50	882	392.119	298	438	66	925	924
	phytozome-next.jgi.doe.gov/report/protein/Gmax_Wm82_a2_v1/Glyma.03G177600.1.p	Glyma.03G177600.1.p	G.max Wm82.a2.v1	6.24e-121	34	934	+/+	seq.submitted 2021-10-27T13:58:52.302Z UTC	4	878	1	886	391.734	315	461	107	925	933
	phytozome-next.jgi.doe.gov/report/protein/Gmax_Wm82_a2_v1/Glyma.19G178400.2.p	Glyma.19G178400.2.p	G.max Wm82.a2.v1	1.65e-119	35	853	+/+	seq.submitted 2021-10-27T13:58:52.302Z UTC	63	878	56	885	387.882	299	431	60	925	932
	phytozome-next.jgi.doe.gov/report/protein/Gmax_Wm82_a2_v1/Glyma.19G178400.1.p	Glyma.19G178400.1.p	G.max Wm82.a2.v1	1.65e-119	35	853	+/+	seq.submitted 2021-10-27T13:58:52.302Z UTC	63	878	56	885	387.882	299	431	60	925	932
	phytozome-next.jgi.doe.gov/report/protein/Gmax_Wm82_a2_v1/Glyma.08G100800.2.p	Glyma.08G100800.2.p	G.max Wm82.a2.v1	2.68e-116	34	837	+/+	seq.submitted 2021-10-27T13:58:52.302Z UTC	84	883	75	885	379.022	287	432	63	925	927
	phytozome-next.jgi.doe.gov/report/protein/Gmax_Wm82_a2_v1/Glyma.05G144400.3.p	Glyma.05G144400.3.p	G.max Wm82.a2.v1	5.96e-108	34	841	+/+	seq.submitted 2021-10-27T13:58:52.302Z UTC	16	815	7	822	354.369	289	430	66	925	831
	phytozome-next.jgi.doe.gov/report/protein/Gmax_Wm82_a2_v1/Glyma.10G048800.2.p	Glyma.10G048800.2.p	G.max Wm82.a2.v1	3.34e-106	40	570	+/+	seq.submitted 2021-10-27T13:58:52.302Z UTC	319	878	82	630	345.125	226	323	31	925	672
	phytozome-next.jgi.doe.gov/report/protein/Gmax_Wm82_a2_v1/Glyma.15G021400.1.p	Glyma.15G021400.1.p	G.max Wm82.a2.v1	6.27e-104	32	918	+/+	seq.submitted 2021-10-27T13:58:52.302Z UTC	12	875	7	865	345.125	290	451	113	925	898
	phytozome-next.jgi.doe.gov/report/protein/Gmax_Wm82_a2_v1/Glyma.11G246200.9.p	Glyma.11G246200.9.p	G.max Wm82.a2.v1	3.84e-103	35	774	+/+	seq.submitted 2021-10-27T13:58:52.302Z UTC	84	813	74	822	341.273	270	395	69	925	825
	phytozome-next.jgi.doe.gov/report/protein/Gmax_Wm82_a2_v1/Glyma.11G246200.2.p	Glyma.11G246200.2.p	G.max Wm82.a2.v1	1.37e-102	38	606	+/+	seq.submitted 2021-10-27T13:58:52.302Z UTC	307	893	61	648	335.495	231	330	37	925	678
	phytozome-next.jgi.doe.gov/report/protein/Gmax_Wm82_a2_v1/Glyma.15G021700.2.p	Glyma.15G021700.2.p	G.max Wm82.a2.v1	5.4e-102	32	900	+/+	seq.submitted 2021-10-27T13:58:52.302Z UTC	12	875	7	859	339.732	287	448	83	925	892
	phytozome-next.jgi.doe.gov/report/protein/Gmax_Wm82_a2_v1/Glyma.13G352900.1.p	Glyma.13G352900.1.p	G.max Wm82.a2.v1	1.85e-101	31	916	+/+	seq.submitted 2021-10-27T13:58:52.302Z UTC	14	886	17	872	338.191	288	449	103	925	888
	phytozome-next.jgi.doe.gov/report/protein/Gmax_Wm82_a2_v1/Glyma.13G352900.4.p	Glyma.13G352900.4.p	G.max Wm82.a2.v1	1.85e-101	31	916	+/+	seq.submitted 2021-10-27T13:58:52.302Z UTC	14	886	17	872	338.191	288	449	103	925	888
	phytozome-next.jgi.doe.gov/report/protein/Gmax_Wm82_a2_v1/Glyma.03G177600.2.p	Glyma.03G177600.2.p	G.max Wm82.a2.v1	2.01e-101	34	876	+/+	seq.submitted 2021-10-27T13:58:52.302Z UTC	4	821	1	829	337.035	296	418	105	925	844
	phytozome-next.jgi.doe.gov/report/protein/Gmax_Wm82_a2_v1/Glyma.15G021800.1.p	Glyma.15G021800.1.p	G.max Wm82.a2.v1	7.93e-101	30	915	+/+	seq.submitted 2021-10-27T13:58:52.302Z UTC	12	881	7	867	336.65	278	440	99	925	893
	phytozome-next.jgi.doe.gov/report/protein/Gmax_Wm82_a2_v1/Glyma.15G021700.1.p	Glyma.15G021700.1.p	G.max Wm82.a2.v1	2.36e-99	32	913	+/+	seq.submitted 2021-10-27T13:58:52.302Z UTC	7	875	1	866	332.798	289	453	91	925	899
	phytozome-next.jgi.doe.gov/report/protein/Gmax_Wm82_a2_v1/Glyma.08G198800.1.p	Glyma.08G198800.1.p	G.max Wm82.a2.v1	1.45e-97	30	821	+/+	seq.submitted 2021-10-27T13:58:52.302Z UTC	90	872	107	868	327.791	250	411	97	925	898
	phytozome-next.jgi.doe.gov/report/protein/Gmax_Wm82_a2_v1/Glyma.11G246200.7.p	Glyma.11G246200.7.p	G.max Wm82.a2.v1	1.35e-96	40	518	+/+	seq.submitted 2021-10-27T13:58:52.302Z UTC	387	893	36	544	316.62	207	292	20	925	574
	phytozome-next.jgi.doe.gov/report/protein/Gmax_Wm82_a2_v1/Glyma.11G246200.3.p	Glyma.11G246200.3.p	G.max Wm82.a2.v1	1.35e-96	40	518	+/+	seq.submitted 2021-10-27T13:58:52.302Z UTC	387	893	36	544	316.62	207	292	20	925	574
	phytozome-next.jgi.doe.gov/report/protein/Gmax_Wm82_a2_v1/Glyma.13G352800.1.p	Glyma.13G352800.1.p	G.max Wm82.a2.v1	5.18e-96	31	907	+/+	seq.submitted 2021-10-27T13:58:52.302Z UTC	12	881	7	874	323.939	282	433	76	925	900
	phytozome-next.jgi.doe.gov/report/protein/Gmax_Wm82_a2_v1/Glyma.15G021900.1.p	Glyma.15G021900.1.p	G.max Wm82.a2.v1	1.56e-95	31	829	+/+	seq.submitted 2021-10-27T13:58:52.302Z UTC	83	875	80	857	322.013	259	408	87	925	889
	phytozome-next.jgi.doe.gov/report/protein/Gmax_Wm82_a2_v1/Glyma.08G199400.1.p	Glyma.08G199400.1.p	G.max Wm82.a2.v1	3.93e-95	31	933	+/+	seq.submitted 2021-10-27T13:58:52.302Z UTC	2	876	1	873	321.242	289	442	118	925	898
	phytozome-next.jgi.doe.gov/report/protein/Gmax_Wm82_a2_v1/Glyma.13G352900.3.p	Glyma.13G352900.3.p	G.max Wm82.a2.v1	2.3e-94	31	918	+/+	seq.submitted 2021-10-27T13:58:52.302Z UTC	14	886	17	841	318.161	285	437	138	925	857
	phytozome-next.jgi.doe.gov/report/protein/Gmax_Wm82_a2_v1/Glyma.13G352900.2.p	Glyma.13G352900.2.p	G.max Wm82.a2.v1	2.3e-94	31	918	+/+	seq.submitted 2021-10-27T13:58:52.302Z UTC	14	886	17	841	318.161	285	437	138	925	857
	phytozome-next.jgi.doe.gov/report/protein/Gmax_Wm82_a2_v1/Glyma.05G144400.4.p	Glyma.05G144400.4.p	G.max Wm82.a2.v1	1.95e-89	33	795	+/+	seq.submitted 2021-10-27T13:58:52.302Z UTC	16	769	7	776	302.753	266	393	66	925	777
	phytozome-next.jgi.doe.gov/report/protein/Gmax_Wm82_a2_v1/Glyma.13G352700.1.p	Glyma.13G352700.1.p	G.max Wm82.a2.v1	1.08e-88	30	852	+/+	seq.submitted 2021-10-27T13:58:52.302Z UTC	82	872	79	845	303.523	257	403	146	925	882
	phytozome-next.jgi.doe.gov/report/protein/Gmax_Wm82_a2_v1/Glyma.13G352700.2.p	Glyma.13G352700.2.p	G.max Wm82.a2.v1	1.2e-88	30	847	+/+	seq.submitted 2021-10-27T13:58:52.302Z UTC	82	872	52	813	302.368	256	402	141	925	850
	phytozome-next.jgi.doe.gov/report/protein/Gmax_Wm82_a2_v1/Glyma.15G266400.1.p	Glyma.15G266400.1.p	G.max Wm82.a2.v1	1.74e-87	31	836	+/+	seq.submitted 2021-10-27T13:58:52.302Z UTC	83	881	84	869	300.442	259	416	87	925	895
	phytozome-next.jgi.doe.gov/report/protein/Gmax_Wm82_a2_v1/Glyma.11G246200.6.p	Glyma.11G246200.6.p	G.max Wm82.a2.v1	1.52e-81	33	723	+/+	seq.submitted 2021-10-27T13:58:52.302Z UTC	84	762	74	771	281.567	241	355	69	925	780
	phytozome-next.jgi.doe.gov/report/protein/Gmax_Wm82_a2_v1/Glyma.U033500.3.p	Glyma.U033500.3.p	G.max Wm82.a2.v1	9.43e-81	42	366	+/+	seq.submitted 2021-10-27T13:58:52.302Z UTC	521	875	136	498	273.478	152	221	14	925	562
	phytozome-next.jgi.doe.gov/report/protein/Gmax_Wm82_a2_v1/Glyma.12G074600.9.p	Glyma.12G074600.9.p	G.max Wm82.a2.v1	2.18e-80	42	366	+/+	seq.submitted 2021-10-27T13:58:52.302Z UTC	521	875	198	560	274.248	152	224	14	925	624
	phytozome-next.jgi.doe.gov/report/protein/Gmax_Wm82_a2_v1/Glyma.12G074600.8.p	Glyma.12G074600.8.p	G.max Wm82.a2.v1	2.18e-80	42	366	+/+	seq.submitted 2021-10-27T13:58:52.302Z UTC	521	875	198	560	274.248	152	224	14	925	624
	phytozome-next.jgi.doe.gov/report/protein/Gmax_Wm82_a2_v1/Glyma.U033500.2.p	Glyma.U033500.2.p	G.max Wm82.a2.v1	4.66e-80	42	366	+/+	seq.submitted 2021-10-27T13:58:52.302Z UTC	521	875	197	559	273.478	152	221	14	925	623
	phytozome-next.jgi.doe.gov/report/protein/Gmax_Wm82_a2_v1/Glyma.U033500.4.p	Glyma.U033500.4.p	G.max Wm82.a2.v1	4.66e-80	42	366	+/+	seq.submitted 2021-10-27T13:58:52.302Z UTC	521	875	197	559	273.478	152	221	14	925	623
	phytozome-next.jgi.doe.gov/report/protein/Gmax_Wm82_a2_v1/Glyma.16G092600.4.p	Glyma.16G092600.4.p	G.max Wm82.a2.v1	8.23e-80	49	294	+/+	seq.submitted 2021-10-27T13:58:52.302Z UTC	582	875	583	875	278.87	144	194	1	925	887
	phytozome-next.jgi.doe.gov/report/protein/Gmax_Wm82_a2_v1/Glyma.16G092600.4.p	Glyma.16G092600.4.p	G.max Wm82.a2.v1	2.76e-24	28	365	+/+	seq.submitted 2021-10-27T13:58:52.302Z UTC	80	425	53	391	110.923	101	164	45	925	887
	phytozome-next.jgi.doe.gov/report/protein/Gmax_Wm82_a2_v1/Glyma.16G092600.3.p	Glyma.16G092600.3.p	G.max Wm82.a2.v1	1.49e-79	49	294	+/+	seq.submitted 2021-10-27T13:58:52.302Z UTC	582	875	601	893	278.485	144	194	1	925	905
	phytozome-next.jgi.doe.gov/report/protein/Gmax_Wm82_a2_v1/Glyma.16G092600.3.p	Glyma.16G092600.3.p	G.max Wm82.a2.v1	2.9e-24	28	365	+/+	seq.submitted 2021-10-27T13:58:52.302Z UTC	80	425	71	409	110.923	101	164	45	925	905
	phytozome-next.jgi.doe.gov/report/protein/Gmax_Wm82_a2_v1/Glyma.16G092600.2.p	Glyma.16G092600.2.p	G.max Wm82.a2.v1	1.91e-79	49	294	+/+	seq.submitted 2021-10-27T13:58:52.302Z UTC	582	875	599	891	278.1	144	194	1	925	903
	phytozome-next.jgi.doe.gov/report/protein/Gmax_Wm82_a2_v1/Glyma.16G092600.2.p	Glyma.16G092600.2.p	G.max Wm82.a2.v1	2.16e-23	28	365	+/+	seq.submitted 2021-10-27T13:58:52.302Z UTC	80	425	71	407	108.227	103	162	47	925	903
	phytozome-next.jgi.doe.gov/report/protein/Gmax_Wm82_a2_v1/Glyma.16G092600.1.p	Glyma.16G092600.1.p	G.max Wm82.a2.v1	2.11e-79	49	294	+/+	seq.submitted 2021-10-27T13:58:52.302Z UTC	582	875	636	928	278.485	144	194	1	925	940
	phytozome-next.jgi.doe.gov/report/protein/Gmax_Wm82_a2_v1/Glyma.16G092600.1.p	Glyma.16G092600.1.p	G.max Wm82.a2.v1	2.52e-24	28	365	+/+	seq.submitted 2021-10-27T13:58:52.302Z UTC	80	425	106	444	111.309	101	164	45	925	940
	phytozome-next.jgi.doe.gov/report/protein/Gmax_Wm82_a2_v1/Glyma.13G201400.1.p	Glyma.13G201400.1.p	G.max Wm82.a2.v1	3.75e-79	46	306	+/+	seq.submitted 2021-10-27T13:58:52.302Z UTC	573	875	494	796	276.559	140	203	6	925	870
	phytozome-next.jgi.doe.gov/report/protein/Gmax_Wm82_a2_v1/Glyma.12G235900.1.p	Glyma.12G235900.1.p	G.max Wm82.a2.v1	7.17e-79	46	306	+/+	seq.submitted 2021-10-27T13:58:52.302Z UTC	573	875	499	801	276.174	140	203	6	925	879
	phytozome-next.jgi.doe.gov/report/protein/Gmax_Wm82_a2_v1/Glyma.12G074600.6.p	Glyma.12G074600.6.p	G.max Wm82.a2.v1	2.05e-78	42	366	+/+	seq.submitted 2021-10-27T13:58:52.302Z UTC	521	875	412	774	273.863	152	224	14	925	838
	phytozome-next.jgi.doe.gov/report/protein/Gmax_Wm82_a2_v1/Glyma.12G074600.1.p	Glyma.12G074600.1.p	G.max Wm82.a2.v1	2.05e-78	42	366	+/+	seq.submitted 2021-10-27T13:58:52.302Z UTC	521	875	412	774	273.863	152	224	14	925	838
	phytozome-next.jgi.doe.gov/report/protein/Gmax_Wm82_a2_v1/Glyma.12G074600.5.p	Glyma.12G074600.5.p	G.max Wm82.a2.v1	2.05e-78	42	366	+/+	seq.submitted 2021-10-27T13:58:52.302Z UTC	521	875	412	774	273.863	152	224	14	925	838
	phytozome-next.jgi.doe.gov/report/protein/Gmax_Wm82_a2_v1/Glyma.12G074600.10.p	Glyma.12G074600.10.p	G.max Wm82.a2.v1	2.05e-78	42	366	+/+	seq.submitted 2021-10-27T13:58:52.302Z UTC	521	875	412	774	273.863	152	224	14	925	838
	phytozome-next.jgi.doe.gov/report/protein/Gmax_Wm82_a2_v1/Glyma.12G074600.7.p	Glyma.12G074600.7.p	G.max Wm82.a2.v1	2.05e-78	42	366	+/+	seq.submitted 2021-10-27T13:58:52.302Z UTC	521	875	412	774	273.863	152	224	14	925	838
	phytozome-next.jgi.doe.gov/report/protein/Gmax_Wm82_a2_v1/Glyma.12G074600.2.p	Glyma.12G074600.2.p	G.max Wm82.a2.v1	2.05e-78	42	366	+/+	seq.submitted 2021-10-27T13:58:52.302Z UTC	521	875	412	774	273.863	152	224	14	925	838
	phytozome-next.jgi.doe.gov/report/protein/Gmax_Wm82_a2_v1/Glyma.12G074600.3.p	Glyma.12G074600.3.p	G.max Wm82.a2.v1	2.05e-78	42	366	+/+	seq.submitted 2021-10-27T13:58:52.302Z UTC	521	875	412	774	273.863	152	224	14	925	838
	phytozome-next.jgi.doe.gov/report/protein/Gmax_Wm82_a2_v1/Glyma.12G074600.4.p	Glyma.12G074600.4.p	G.max Wm82.a2.v1	2.05e-78	42	366	+/+	seq.submitted 2021-10-27T13:58:52.302Z UTC	521	875	412	774	273.863	152	224	14	925	838
	phytozome-next.jgi.doe.gov/report/protein/Gmax_Wm82_a2_v1/Glyma.U033500.1.p	Glyma.U033500.1.p	G.max Wm82.a2.v1	2.83e-78	42	366	+/+	seq.submitted 2021-10-27T13:58:52.302Z UTC	521	875	386	748	273.092	152	221	14	925	812
	phytozome-next.jgi.doe.gov/report/protein/Gmax_Wm82_a2_v1/Glyma.12G211800.2.p	Glyma.12G211800.2.p	G.max Wm82.a2.v1	2.84e-78	40	376	+/+	seq.submitted 2021-10-27T13:58:52.302Z UTC	504	868	1	366	261.151	151	214	21	925	384
	phytozome-next.jgi.doe.gov/report/protein/Gmax_Wm82_a2_v1/Glyma.12G211800.1.p	Glyma.12G211800.1.p	G.max Wm82.a2.v1	4.12e-78	40	376	+/+	seq.submitted 2021-10-27T13:58:52.302Z UTC	504	868	1	366	261.151	151	214	21	925	397
	phytozome-next.jgi.doe.gov/report/protein/Gmax_Wm82_a2_v1/Glyma.12G148200.1.p	Glyma.12G148200.1.p	G.max Wm82.a2.v1	1.72e-77	43	345	+/+	seq.submitted 2021-10-27T13:58:52.302Z UTC	548	887	452	794	271.552	148	211	7	925	847
	phytozome-next.jgi.doe.gov/report/protein/Gmax_Wm82_a2_v1/Glyma.13G206300.1.p	Glyma.13G206300.1.p	G.max Wm82.a2.v1	2.49e-77	47	290	+/+	seq.submitted 2021-10-27T13:58:52.302Z UTC	583	868	98	387	259.996	136	187	4	925	426
	phytozome-next.jgi.doe.gov/report/protein/Gmax_Wm82_a2_v1/Glyma.13G289900.2.p	Glyma.13G289900.2.p	G.max Wm82.a2.v1	7.12e-77	40	376	+/+	seq.submitted 2021-10-27T13:58:52.302Z UTC	504	868	1	366	257.684	150	213	21	925	397
	phytozome-next.jgi.doe.gov/report/protein/Gmax_Wm82_a2_v1/Glyma.10G041300.3.p	Glyma.10G041300.3.p	G.max Wm82.a2.v1	3.11e-76	44	306	+/+	seq.submitted 2021-10-27T13:58:52.302Z UTC	581	883	215	516	263.077	135	201	7	925	631
	phytozome-next.jgi.doe.gov/report/protein/Gmax_Wm82_a2_v1/Glyma.13G289900.1.p	Glyma.13G289900.1.p	G.max Wm82.a2.v1	3.93e-76	39	380	+/+	seq.submitted 2021-10-27T13:58:52.302Z UTC	504	868	1	371	255.758	148	213	24	925	402
	phytozome-next.jgi.doe.gov/report/protein/Gmax_Wm82_a2_v1/Glyma.08G249200.1.p	Glyma.08G249200.1.p	G.max Wm82.a2.v1	9.5e-76	43	360	+/+	seq.submitted 2021-10-27T13:58:52.302Z UTC	523	878	456	802	267.314	156	218	17	925	872
	phytozome-next.jgi.doe.gov/report/protein/Gmax_Wm82_a2_v1/Glyma.15G106400.1.p	Glyma.15G106400.1.p	G.max Wm82.a2.v1	1.08e-75	44	324	+/+	seq.submitted 2021-10-27T13:58:52.302Z UTC	583	889	63	386	254.218	141	195	17	925	391
	phytozome-next.jgi.doe.gov/report/protein/Gmax_Wm82_a2_v1/Glyma.18G270100.1.p	Glyma.18G270100.1.p	G.max Wm82.a2.v1	1.17e-75	48	309	+/+	seq.submitted 2021-10-27T13:58:52.302Z UTC	584	887	505	811	266.929	148	198	7	925	869
	phytozome-next.jgi.doe.gov/report/protein/Gmax_Wm82_a2_v1/Glyma.19G245800.1.p	Glyma.19G245800.1.p	G.max Wm82.a2.v1	1.32e-75	45	294	+/+	seq.submitted 2021-10-27T13:58:52.302Z UTC	586	877	511	804	266.544	133	194	2	925	867
	phytozome-next.jgi.doe.gov/report/protein/Gmax_Wm82_a2_v1/Glyma.10G041300.2.p	Glyma.10G041300.2.p	G.max Wm82.a2.v1	1.75e-75	44	306	+/+	seq.submitted 2021-10-27T13:58:52.302Z UTC	581	883	305	606	263.462	135	201	7	925	721
	phytozome-next.jgi.doe.gov/report/protein/Gmax_Wm82_a2_v1/Glyma.20G225800.1.p	Glyma.20G225800.1.p	G.max Wm82.a2.v1	3.4e-75	45	294	+/+	seq.submitted 2021-10-27T13:58:52.302Z UTC	586	877	508	801	265.003	131	192	2	925	844
	phytozome-next.jgi.doe.gov/report/protein/Gmax_Wm82_a2_v1/Glyma.03G247800.1.p	Glyma.03G247800.1.p	G.max Wm82.a2.v1	4.16e-75	45	294	+/+	seq.submitted 2021-10-27T13:58:52.302Z UTC	586	877	514	807	265.388	132	193	2	925	870
	phytozome-next.jgi.doe.gov/report/protein/Gmax_Wm82_a2_v1/Glyma.10G041300.1.p	Glyma.10G041300.1.p	G.max Wm82.a2.v1	4.45e-75	44	306	+/+	seq.submitted 2021-10-27T13:58:52.302Z UTC	581	883	338	639	263.077	135	201	7	925	754
	phytozome-next.jgi.doe.gov/report/protein/Gmax_Wm82_a2_v1/Glyma.09G024700.1.p	Glyma.09G024700.1.p	G.max Wm82.a2.v1	1.67e-74	40	387	+/+	seq.submitted 2021-10-27T13:58:52.302Z UTC	507	872	417	798	263.462	154	221	26	925	853
	phytozome-next.jgi.doe.gov/report/protein/Gmax_Wm82_a2_v1/Glyma.09G024700.1.p	Glyma.09G024700.1.p	G.max Wm82.a2.v1	1.89e-05	27	179	+/+	seq.submitted 2021-10-27T13:58:52.302Z UTC	165	315	189	362	50.0618	49	81	33	925	853
	phytozome-next.jgi.doe.gov/report/protein/Gmax_Wm82_a2_v1/Glyma.09G024700.2.p	Glyma.09G024700.2.p	G.max Wm82.a2.v1	1.67e-74	40	387	+/+	seq.submitted 2021-10-27T13:58:52.302Z UTC	507	872	417	798	263.462	154	221	26	925	853
	phytozome-next.jgi.doe.gov/report/protein/Gmax_Wm82_a2_v1/Glyma.09G024700.2.p	Glyma.09G024700.2.p	G.max Wm82.a2.v1	1.89e-05	27	179	+/+	seq.submitted 2021-10-27T13:58:52.302Z UTC	165	315	189	362	50.0618	49	81	33	925	853
	phytozome-next.jgi.doe.gov/report/protein/Gmax_Wm82_a2_v1/Glyma.17G102600.1.p	Glyma.17G102600.1.p	G.max Wm82.a2.v1	2.03e-74	45	303	+/+	seq.submitted 2021-10-27T13:58:52.302Z UTC	586	886	516	813	263.077	136	197	7	925	862
	phytozome-next.jgi.doe.gov/report/protein/Gmax_Wm82_a2_v1/Glyma.02G121900.1.p	Glyma.02G121900.1.p	G.max Wm82.a2.v1	2.21e-74	42	370	+/+	seq.submitted 2021-10-27T13:58:52.302Z UTC	510	873	447	808	262.307	155	221	14	925	821
	phytozome-next.jgi.doe.gov/report/protein/Gmax_Wm82_a2_v1/Glyma.02G121900.1.p	Glyma.02G121900.1.p	G.max Wm82.a2.v1	0.0132	47	45	+/+	seq.submitted 2021-10-27T13:58:52.302Z UTC	269	310	339	383	40.817	21	31	3	925	821
	phytozome-next.jgi.doe.gov/report/protein/Gmax_Wm82_a2_v1/Glyma.03G169200.1.p	Glyma.03G169200.1.p	G.max Wm82.a2.v1	4.68e-74	45	304	+/+	seq.submitted 2021-10-27T13:58:52.302Z UTC	581	880	365	664	260.766	136	205	8	925	787
	phytozome-next.jgi.doe.gov/report/protein/Gmax_Wm82_a2_v1/Glyma.08G248900.1.p	Glyma.08G248900.1.p	G.max Wm82.a2.v1	6.16e-74	42	375	+/+	seq.submitted 2021-10-27T13:58:52.302Z UTC	510	878	432	795	261.536	157	223	17	925	842
	phytozome-next.jgi.doe.gov/report/protein/Gmax_Wm82_a2_v1/Glyma.18G270700.1.p	Glyma.18G270700.1.p	G.max Wm82.a2.v1	7.13e-74	48	299	+/+	seq.submitted 2021-10-27T13:58:52.302Z UTC	584	878	509	805	261.536	143	190	6	925	858
	phytozome-next.jgi.doe.gov/report/protein/Gmax_Wm82_a2_v1/Glyma.15G124900.1.p	Glyma.15G124900.1.p	G.max Wm82.a2.v1	8.23e-74	47	293	+/+	seq.submitted 2021-10-27T13:58:52.302Z UTC	586	872	635	920	263.077	138	196	13	925	958
	phytozome-next.jgi.doe.gov/report/protein/Gmax_Wm82_a2_v1/Glyma.15G124900.1.p	Glyma.15G124900.1.p	G.max Wm82.a2.v1	0.0302	36	72	+/+	seq.submitted 2021-10-27T13:58:52.302Z UTC	372	442	42	108	39.6614	26	39	6	925	958
	phytozome-next.jgi.doe.gov/report/protein/Gmax_Wm82_a2_v1/Glyma.08G093100.1.p	Glyma.08G093100.1.p	G.max Wm82.a2.v1	9.28e-74	40	376	+/+	seq.submitted 2021-10-27T13:58:52.302Z UTC	520	889	2	349	249.595	150	209	34	925	405
	phytozome-next.jgi.doe.gov/report/protein/Gmax_Wm82_a2_v1/Glyma.13G054400.1.p	Glyma.13G054400.1.p	G.max Wm82.a2.v1	2e-73	46	299	+/+	seq.submitted 2021-10-27T13:58:52.302Z UTC	586	880	523	819	261.151	139	190	6	925	897
	phytozome-next.jgi.doe.gov/report/protein/Gmax_Wm82_a2_v1/Glyma.09G018800.2.p	Glyma.09G018800.2.p	G.max Wm82.a2.v1	2.24e-73	47	293	+/+	seq.submitted 2021-10-27T13:58:52.302Z UTC	586	872	622	907	261.922	137	194	13	925	954
	phytozome-next.jgi.doe.gov/report/protein/Gmax_Wm82_a2_v1/Glyma.09G018800.2.p	Glyma.09G018800.2.p	G.max Wm82.a2.v1	0.045	36	72	+/+	seq.submitted 2021-10-27T13:58:52.302Z UTC	372	442	32	98	38.891	26	39	6	925	954
	phytozome-next.jgi.doe.gov/report/protein/Gmax_Wm82_a2_v1/Glyma.09G018800.1.p	Glyma.09G018800.1.p	G.max Wm82.a2.v1	2.29e-73	47	293	+/+	seq.submitted 2021-10-27T13:58:52.302Z UTC	586	872	623	908	261.922	137	194	13	925	955
	phytozome-next.jgi.doe.gov/report/protein/Gmax_Wm82_a2_v1/Glyma.09G018800.1.p	Glyma.09G018800.1.p	G.max Wm82.a2.v1	0.0446	36	72	+/+	seq.submitted 2021-10-27T13:58:52.302Z UTC	372	442	32	98	38.891	26	39	6	925	955
	phytozome-next.jgi.doe.gov/report/protein/Gmax_Wm82_a2_v1/Glyma.10G163200.1.p	Glyma.10G163200.1.p	G.max Wm82.a2.v1	2.31e-73	44	294	+/+	seq.submitted 2021-10-27T13:58:52.302Z UTC	586	877	507	800	260.381	130	190	2	925	863
	phytozome-next.jgi.doe.gov/report/protein/Gmax_Wm82_a2_v1/Glyma.18G269900.1.p	Glyma.18G269900.1.p	G.max Wm82.a2.v1	2.36e-73	48	297	+/+	seq.submitted 2021-10-27T13:58:52.302Z UTC	586	878	508	802	260.381	142	189	6	925	870
	phytozome-next.jgi.doe.gov/report/protein/Gmax_Wm82_a2_v1/Glyma.13G053600.2.p	Glyma.13G053600.2.p	G.max Wm82.a2.v1	2.46e-73	46	299	+/+	seq.submitted 2021-10-27T13:58:52.302Z UTC	586	880	521	817	260.766	139	190	6	925	895
	phytozome-next.jgi.doe.gov/report/protein/Gmax_Wm82_a2_v1/Glyma.13G053600.1.p	Glyma.13G053600.1.p	G.max Wm82.a2.v1	2.46e-73	46	299	+/+	seq.submitted 2021-10-27T13:58:52.302Z UTC	586	880	521	817	260.766	139	190	6	925	895
	phytozome-next.jgi.doe.gov/report/protein/Gmax_Wm82_a2_v1/Glyma.02G035300.1.p	Glyma.02G035300.1.p	G.max Wm82.a2.v1	2.77e-73	44	292	+/+	seq.submitted 2021-10-27T13:58:52.302Z UTC	586	871	301	589	256.144	129	193	9	925	681
	phytozome-next.jgi.doe.gov/report/protein/Gmax_Wm82_a2_v1/Glyma.09G018900.1.p	Glyma.09G018900.1.p	G.max Wm82.a2.v1	2.93e-73	41	365	+/+	seq.submitted 2021-10-27T13:58:52.302Z UTC	520	872	494	842	260.766	148	219	28	925	897
	phytozome-next.jgi.doe.gov/report/protein/Gmax_Wm82_a2_v1/Glyma.11G085400.1.p	Glyma.11G085400.1.p	G.max Wm82.a2.v1	3.27e-73	39	399	+/+	seq.submitted 2021-10-27T13:58:52.302Z UTC	528	892	5	402	248.054	154	220	35	925	406
	phytozome-next.jgi.doe.gov/report/protein/Gmax_Wm82_a2_v1/Glyma.14G025200.2.p	Glyma.14G025200.2.p	G.max Wm82.a2.v1	3.54e-73	42	326	+/+	seq.submitted 2021-10-27T13:58:52.302Z UTC	557	869	28	353	247.284	136	192	13	925	380
	phytozome-next.jgi.doe.gov/report/protein/Gmax_Wm82_a2_v1/Glyma.14G025200.1.p	Glyma.14G025200.1.p	G.max Wm82.a2.v1	3.54e-73	42	326	+/+	seq.submitted 2021-10-27T13:58:52.302Z UTC	557	869	28	353	247.284	136	192	13	925	380
	phytozome-next.jgi.doe.gov/report/protein/Gmax_Wm82_a2_v1/Glyma.11G085400.3.p	Glyma.11G085400.3.p	G.max Wm82.a2.v1	4.95e-73	42	343	+/+	seq.submitted 2021-10-27T13:58:52.302Z UTC	563	892	54	388	247.284	143	203	21	925	392
	phytozome-next.jgi.doe.gov/report/protein/Gmax_Wm82_a2_v1/Glyma.02G311200.1.p	Glyma.02G311200.1.p	G.max Wm82.a2.v1	5.35e-73	43	318	+/+	seq.submitted 2021-10-27T13:58:52.302Z UTC	568	869	58	373	247.669	136	195	18	925	413
	phytozome-next.jgi.doe.gov/report/protein/Gmax_Wm82_a2_v1/Glyma.13G128200.2.p	Glyma.13G128200.2.p	G.max Wm82.a2.v1	5.51e-73	44	303	+/+	seq.submitted 2021-10-27T13:58:52.302Z UTC	581	880	255	553	254.988	133	199	7	925	671
	Paralogs	Protein/splice variant	Species	E-value	% identity	Align len	Strands	Query ID	Query from	Query to	Target from	Target to	Bitscore
	1	Glyma.01G020100.1.p	G.max Wm82.a2.v1	0	80	927	+/+	seq.submitted 2021-10-27T13:58:52.302Z UTC	1	925	1	919	1388.25
	2	Glyma.03G177600.1.p	G.max Wm82.a2.v1	6.24e-121	34	934	+/+	seq.submitted 2021-10-27T13:58:52.302Z UTC	4	878	1	886	391.734
		Glyma.03G177600.2.p	G.max Wm82.a2.v1	2.01e-101	34	876	+/+	seq.submitted 2021-10-27T13:58:52.302Z UTC	4	821	1	829	337.035
	3	Glyma.05G144400.1.p	G.max Wm82.a2.v1	6.83e-127	34	909	+/+	seq.submitted 2021-10-27T13:58:52.302Z UTC	16	883	7	890	407.527
		Glyma.05G144400.3.p	G.max Wm82.a2.v1	5.96e-108	34	841	+/+	seq.submitted 2021-10-27T13:58:52.302Z UTC	16	815	7	822	354.369
	4	Glyma.08G100800.1.p	G.max Wm82.a2.v1	2.8e-122	35	837	+/+	seq.submitted 2021-10-27T13:58:52.302Z UTC	84	883	75	892	395.201
		Glyma.08G100800.2.p	G.max Wm82.a2.v1	2.68e-116	34	837	+/+	seq.submitted 2021-10-27T13:58:52.302Z UTC	84	883	75	885	379.022
	5	Glyma.09G202300.1.p	G.max Wm82.a2.v1	0	79	927	+/+	seq.submitted 2021-10-27T13:58:52.302Z UTC	1	925	1	919	1382.47
		Glyma.09G202300.2.p	G.max Wm82.a2.v1	0	75	708	+/+	seq.submitted 2021-10-27T13:58:52.302Z UTC	1	706	1	700	989.178
	6	Glyma.10G048800.1.p	G.max Wm82.a2.v1	3.61e-121	35	859	+/+	seq.submitted 2021-10-27T13:58:52.302Z UTC	60	878	50	882	392.119
		Glyma.10G048800.2.p	G.max Wm82.a2.v1	3.34e-106	40	570	+/+	seq.submitted 2021-10-27T13:58:52.302Z UTC	319	878	82	630	345.125
	7	Glyma.11G246200.1.p	G.max Wm82.a2.v1	3.57e-123	35	854	+/+	seq.submitted 2021-10-27T13:58:52.302Z UTC	84	893	74	901	397.512
		Glyma.11G246200.2.p	G.max Wm82.a2.v1	1.37e-102	38	606	+/+	seq.submitted 2021-10-27T13:58:52.302Z UTC	307	893	61	648	335.495
		Glyma.11G246200.4.p	G.max Wm82.a2.v1	9.31e-124	35	854	+/+	seq.submitted 2021-10-27T13:58:52.302Z UTC	84	893	23	850	397.512
		Glyma.11G246200.5.p	G.max Wm82.a2.v1	9.31e-124	35	854	+/+	seq.submitted 2021-10-27T13:58:52.302Z UTC	84	893	23	850	397.512
		Glyma.11G246200.9.p	G.max Wm82.a2.v1	3.84e-103	35	774	+/+	seq.submitted 2021-10-27T13:58:52.302Z UTC	84	813	74	822	341.273
	8	Glyma.13G136700.1.p	G.max Wm82.a2.v1	5.99e-123	34	859	+/+	seq.submitted 2021-10-27T13:58:52.302Z UTC	60	878	77	909	397.512
		Glyma.13G136700.2.p	G.max Wm82.a2.v1	4.18e-123	34	859	+/+	seq.submitted 2021-10-27T13:58:52.302Z UTC	60	878	52	884	397.127
		Glyma.13G136700.3.p	G.max Wm82.a2.v1	4.18e-123	34	859	+/+	seq.submitted 2021-10-27T13:58:52.302Z UTC	60	878	52	884	397.127
	9	Glyma.13G352900.1.p	G.max Wm82.a2.v1	1.85e-101	31	916	+/+	seq.submitted 2021-10-27T13:58:52.302Z UTC	14	886	17	872	338.191
		Glyma.13G352900.4.p	G.max Wm82.a2.v1	1.85e-101	31	916	+/+	seq.submitted 2021-10-27T13:58:52.302Z UTC	14	886	17	872	338.191
	10	Glyma.15G021400.1.p	G.max Wm82.a2.v1	6.27e-104	32	918	+/+	seq.submitted 2021-10-27T13:58:52.302Z UTC	12	875	7	865	345.125
		Glyma.15G021700.2.p	G.max Wm82.a2.v1	5.4e-102	32	900	+/+	seq.submitted 2021-10-27T13:58:52.302Z UTC	12	875	7	859	339.732
	11	Glyma.18G011000.1.p	G.max Wm82.a2.v1	1.52e-124	35	852	+/+	seq.submitted 2021-10-27T13:58:52.302Z UTC	84	891	74	899	400.979
	12	Glyma.19G178400.1.p	G.max Wm82.a2.v1	1.65e-119	35	853	+/+	seq.submitted 2021-10-27T13:58:52.302Z UTC	63	878	56	885	387.882
		Glyma.19G178400.2.p	G.max Wm82.a2.v1	1.65e-119	35	853	+/+	seq.submitted 2021-10-27T13:58:52.302Z UTC	63	878	56	885	387.882

## Sheet: Gossypium
	Views	Protein	Species	E-value	% identity	Align len	Strands	Query ID	Query from	Query to	Target from	Target to	Bitscore	# identical	Positives	Gaps	Query len	Target len
	phytozome-next.jgi.doe.gov/report/protein/Ghirsutum_v2_1/Gohir.D12G080401.1.p	Gohir.D12G080401.1.p	G.hirsutum v2.1	0	58	941	+/+	seq.submitted 2021-10-26T21:26:24.400Z UTC	1	925	1	922	1013.45	549	692	35	925	923
	phytozome-next.jgi.doe.gov/report/protein/Ghirsutum_v2_1/Gohir.D12G080401.2.p	Gohir.D12G080401.2.p	G.hirsutum v2.1	0	58	941	+/+	seq.submitted 2021-10-26T21:26:24.400Z UTC	1	925	1	919	1008.82	544	685	38	925	920
	phytozome-next.jgi.doe.gov/report/protein/Ghirsutum_v2_1/Gohir.A12G082300.1.p	Gohir.A12G082300.1.p	G.hirsutum v2.1	0	57	941	+/+	seq.submitted 2021-10-26T21:26:24.400Z UTC	1	925	1	922	999.579	541	687	35	925	923
	phytozome-next.jgi.doe.gov/report/protein/Ghirsutum_v2_1/Gohir.D02G154300.3.p	Gohir.D02G154300.3.p	G.hirsutum v2.1	5.09e-127	35	905	+/+	seq.submitted 2021-10-26T21:26:24.400Z UTC	16	875	7	887	407.912	318	458	69	925	933
	phytozome-next.jgi.doe.gov/report/protein/Ghirsutum_v2_1/Gohir.D02G154300.1.p	Gohir.D02G154300.1.p	G.hirsutum v2.1	5.09e-127	35	905	+/+	seq.submitted 2021-10-26T21:26:24.400Z UTC	16	875	7	887	407.912	318	458	69	925	933
	phytozome-next.jgi.doe.gov/report/protein/Ghirsutum_v2_1/Gohir.A03G130600.1.p	Gohir.A03G130600.1.p	G.hirsutum v2.1	2.35e-124	35	902	+/+	seq.submitted 2021-10-26T21:26:24.400Z UTC	20	875	7	887	400.979	315	454	67	925	933
	phytozome-next.jgi.doe.gov/report/protein/Ghirsutum_v2_1/Gohir.D09G147900.1.p	Gohir.D09G147900.1.p	G.hirsutum v2.1	3.26e-121	34	891	+/+	seq.submitted 2021-10-26T21:26:24.400Z UTC	32	875	28	882	392.504	305	447	83	925	932
	phytozome-next.jgi.doe.gov/report/protein/Ghirsutum_v2_1/Gohir.A09G152300.1.p	Gohir.A09G152300.1.p	G.hirsutum v2.1	3.21e-120	34	882	+/+	seq.submitted 2021-10-26T21:26:24.400Z UTC	32	875	28	880	389.808	298	440	67	925	930
	phytozome-next.jgi.doe.gov/report/protein/Ghirsutum_v2_1/Gohir.D10G065900.1.p	Gohir.D10G065900.1.p	G.hirsutum v2.1	2.85e-86	31	824	+/+	seq.submitted 2021-10-26T21:26:24.400Z UTC	92	872	71	820	296.204	252	389	117	925	848
	phytozome-next.jgi.doe.gov/report/protein/Ghirsutum_v2_1/Gohir.D08G212500.1.p	Gohir.D08G212500.1.p	G.hirsutum v2.1	4.68e-84	51	294	+/+	seq.submitted 2021-10-26T21:26:24.400Z UTC	582	875	606	898	291.197	150	202	1	925	910
	phytozome-next.jgi.doe.gov/report/protein/Ghirsutum_v2_1/Gohir.D08G212500.1.p	Gohir.D08G212500.1.p	G.hirsutum v2.1	4.03e-26	28	369	+/+	seq.submitted 2021-10-26T21:26:24.400Z UTC	76	425	75	417	117.087	104	167	45	925	910
	phytozome-next.jgi.doe.gov/report/protein/Ghirsutum_v2_1/Gohir.A08G194800.2.p	Gohir.A08G194800.2.p	G.hirsutum v2.1	4.47e-83	51	294	+/+	seq.submitted 2021-10-26T21:26:24.400Z UTC	582	875	606	898	288.5	149	202	1	925	912
	phytozome-next.jgi.doe.gov/report/protein/Ghirsutum_v2_1/Gohir.A08G194800.2.p	Gohir.A08G194800.2.p	G.hirsutum v2.1	8.85e-26	28	369	+/+	seq.submitted 2021-10-26T21:26:24.400Z UTC	76	425	75	417	116.316	104	168	45	925	912
	phytozome-next.jgi.doe.gov/report/protein/Ghirsutum_v2_1/Gohir.A08G194800.1.p	Gohir.A08G194800.1.p	G.hirsutum v2.1	4.83e-83	51	294	+/+	seq.submitted 2021-10-26T21:26:24.400Z UTC	582	875	606	898	288.5	149	202	1	925	910
	phytozome-next.jgi.doe.gov/report/protein/Ghirsutum_v2_1/Gohir.A08G194800.1.p	Gohir.A08G194800.1.p	G.hirsutum v2.1	9.71e-26	28	369	+/+	seq.submitted 2021-10-26T21:26:24.400Z UTC	76	425	75	417	115.931	104	168	45	925	910
	phytozome-next.jgi.doe.gov/report/protein/Ghirsutum_v2_1/Gohir.A13G020500.1.p	Gohir.A13G020500.1.p	G.hirsutum v2.1	3.76e-82	41	382	+/+	seq.submitted 2021-10-26T21:26:24.400Z UTC	504	879	386	753	283.878	155	227	20	925	808
	phytozome-next.jgi.doe.gov/report/protein/Ghirsutum_v2_1/Gohir.D13G030600.2.p	Gohir.D13G030600.2.p	G.hirsutum v2.1	1.58e-81	48	296	+/+	seq.submitted 2021-10-26T21:26:24.400Z UTC	586	879	501	793	283.108	143	200	5	925	852
	phytozome-next.jgi.doe.gov/report/protein/Ghirsutum_v2_1/Gohir.A13G032400.2.p	Gohir.A13G032400.2.p	G.hirsutum v2.1	1.72e-81	48	296	+/+	seq.submitted 2021-10-26T21:26:24.400Z UTC	586	879	506	798	283.108	143	200	5	925	857
	phytozome-next.jgi.doe.gov/report/protein/Ghirsutum_v2_1/Gohir.D07G162900.1.p	Gohir.D07G162900.1.p	G.hirsutum v2.1	1.94e-80	50	286	+/+	seq.submitted 2021-10-26T21:26:24.400Z UTC	586	871	606	890	281.182	144	191	1	925	906
	phytozome-next.jgi.doe.gov/report/protein/Ghirsutum_v2_1/Gohir.D07G162900.1.p	Gohir.D07G162900.1.p	G.hirsutum v2.1	2.65e-27	29	384	+/+	seq.submitted 2021-10-26T21:26:24.400Z UTC	76	441	68	424	120.939	112	176	45	925	906
	phytozome-next.jgi.doe.gov/report/protein/Ghirsutum_v2_1/Gohir.A07G156600.1.p	Gohir.A07G156600.1.p	G.hirsutum v2.1	6.69e-80	49	290	+/+	seq.submitted 2021-10-26T21:26:24.400Z UTC	582	871	600	888	279.641	143	193	1	925	904
	phytozome-next.jgi.doe.gov/report/protein/Ghirsutum_v2_1/Gohir.A07G156600.1.p	Gohir.A07G156600.1.p	G.hirsutum v2.1	9.21e-28	30	384	+/+	seq.submitted 2021-10-26T21:26:24.400Z UTC	76	441	68	424	122.479	115	178	45	925	904
	phytozome-next.jgi.doe.gov/report/protein/Ghirsutum_v2_1/Gohir.A07G156600.3.p	Gohir.A07G156600.3.p	G.hirsutum v2.1	6.69e-80	49	290	+/+	seq.submitted 2021-10-26T21:26:24.400Z UTC	582	871	600	888	279.641	143	193	1	925	904
	phytozome-next.jgi.doe.gov/report/protein/Ghirsutum_v2_1/Gohir.A07G156600.3.p	Gohir.A07G156600.3.p	G.hirsutum v2.1	9.21e-28	30	384	+/+	seq.submitted 2021-10-26T21:26:24.400Z UTC	76	441	68	424	122.479	115	178	45	925	904
	phytozome-next.jgi.doe.gov/report/protein/Ghirsutum_v2_1/Gohir.D08G010000.1.p	Gohir.D08G010000.1.p	G.hirsutum v2.1	1.27e-79	41	400	+/+	seq.submitted 2021-10-26T21:26:24.400Z UTC	491	875	384	769	277.33	162	230	29	925	834
	phytozome-next.jgi.doe.gov/report/protein/Ghirsutum_v2_1/Gohir.A08G000133.1.p	Gohir.A08G000133.1.p	G.hirsutum v2.1	1.83e-79	41	400	+/+	seq.submitted 2021-10-26T21:26:24.400Z UTC	491	875	384	769	276.944	162	230	29	925	834
	phytozome-next.jgi.doe.gov/report/protein/Ghirsutum_v2_1/Gohir.A03G037500.1.p	Gohir.A03G037500.1.p	G.hirsutum v2.1	2.83e-79	39	401	+/+	seq.submitted 2021-10-26T21:26:24.400Z UTC	491	875	383	768	276.559	158	233	31	925	832
	phytozome-next.jgi.doe.gov/report/protein/Ghirsutum_v2_1/Gohir.D05G360600.2.p	Gohir.D05G360600.2.p	G.hirsutum v2.1	3.05e-79	47	296	+/+	seq.submitted 2021-10-26T21:26:24.400Z UTC	586	879	488	781	276.559	140	195	4	925	834
	phytozome-next.jgi.doe.gov/report/protein/Ghirsutum_v2_1/Gohir.D02G218300.1.p	Gohir.D02G218300.1.p	G.hirsutum v2.1	4.51e-79	48	292	+/+	seq.submitted 2021-10-26T21:26:24.400Z UTC	586	875	508	796	276.559	140	196	5	925	864
	phytozome-next.jgi.doe.gov/report/protein/Ghirsutum_v2_1/Gohir.A12G179300.2.p	Gohir.A12G179300.2.p	G.hirsutum v2.1	8.36e-79	46	297	+/+	seq.submitted 2021-10-26T21:26:24.400Z UTC	586	880	281	575	270.396	137	195	4	925	632
	phytozome-next.jgi.doe.gov/report/protein/Ghirsutum_v2_1/Gohir.D04G060466.1.p	Gohir.D04G060466.1.p	G.hirsutum v2.1	8.53e-79	47	289	+/+	seq.submitted 2021-10-26T21:26:24.400Z UTC	591	877	47	333	263.077	136	189	4	925	394
	phytozome-next.jgi.doe.gov/report/protein/Ghirsutum_v2_1/Gohir.A03G196900.1.p	Gohir.A03G196900.1.p	G.hirsutum v2.1	9.38e-79	48	292	+/+	seq.submitted 2021-10-26T21:26:24.400Z UTC	586	875	479	767	275.018	139	196	5	925	835
	phytozome-next.jgi.doe.gov/report/protein/Ghirsutum_v2_1/Gohir.D13G021100.1.p	Gohir.D13G021100.1.p	G.hirsutum v2.1	1.12e-78	40	383	+/+	seq.submitted 2021-10-26T21:26:24.400Z UTC	504	880	358	727	273.863	155	225	19	925	781
	phytozome-next.jgi.doe.gov/report/protein/Ghirsutum_v2_1/Gohir.D12G071600.1.p	Gohir.D12G071600.1.p	G.hirsutum v2.1	1.5e-78	44	381	+/+	seq.submitted 2021-10-26T21:26:24.400Z UTC	515	878	397	773	274.248	169	219	21	925	824
	phytozome-next.jgi.doe.gov/report/protein/Ghirsutum_v2_1/Gohir.D03G130900.1.p	Gohir.D03G130900.1.p	G.hirsutum v2.1	6.21e-78	39	401	+/+	seq.submitted 2021-10-26T21:26:24.400Z UTC	491	875	383	768	272.707	155	232	31	925	832
	phytozome-next.jgi.doe.gov/report/protein/Ghirsutum_v2_1/Gohir.A07G156600.2.p	Gohir.A07G156600.2.p	G.hirsutum v2.1	8.35e-78	49	294	+/+	seq.submitted 2021-10-26T21:26:24.400Z UTC	582	871	600	892	273.863	143	193	5	925	908
	phytozome-next.jgi.doe.gov/report/protein/Ghirsutum_v2_1/Gohir.A07G156600.2.p	Gohir.A07G156600.2.p	G.hirsutum v2.1	9.51e-28	30	384	+/+	seq.submitted 2021-10-26T21:26:24.400Z UTC	76	441	68	424	122.479	115	178	45	925	908
	phytozome-next.jgi.doe.gov/report/protein/Ghirsutum_v2_1/Gohir.A10G014000.3.p	Gohir.A10G014000.3.p	G.hirsutum v2.1	8.51e-78	46	293	+/+	seq.submitted 2021-10-26T21:26:24.400Z UTC	581	869	30	322	259.225	135	192	4	925	360
	phytozome-next.jgi.doe.gov/report/protein/Ghirsutum_v2_1/Gohir.A10G014000.2.p	Gohir.A10G014000.2.p	G.hirsutum v2.1	1.2e-77	46	293	+/+	seq.submitted 2021-10-26T21:26:24.400Z UTC	581	869	59	351	259.61	135	192	4	925	389
	phytozome-next.jgi.doe.gov/report/protein/Ghirsutum_v2_1/Gohir.A10G014000.1.p	Gohir.A10G014000.1.p	G.hirsutum v2.1	1.2e-77	46	293	+/+	seq.submitted 2021-10-26T21:26:24.400Z UTC	581	869	59	351	259.61	135	192	4	925	389
	phytozome-next.jgi.doe.gov/report/protein/Ghirsutum_v2_1/Gohir.A01G067500.2.p	Gohir.A01G067500.2.p	G.hirsutum v2.1	1.68e-77	46	304	+/+	seq.submitted 2021-10-26T21:26:24.400Z UTC	586	887	488	789	271.552	140	197	4	925	840
	phytozome-next.jgi.doe.gov/report/protein/Ghirsutum_v2_1/Gohir.D01G054800.1.p	Gohir.D01G054800.1.p	G.hirsutum v2.1	1.86e-77	46	304	+/+	seq.submitted 2021-10-26T21:26:24.400Z UTC	586	887	488	789	271.552	140	197	4	925	840
	phytozome-next.jgi.doe.gov/report/protein/Ghirsutum_v2_1/Gohir.A04G027601.1.p	Gohir.A04G027601.1.p	G.hirsutum v2.1	2.13e-77	40	376	+/+	seq.submitted 2021-10-26T21:26:24.400Z UTC	517	879	368	737	270.396	152	223	19	925	790
	phytozome-next.jgi.doe.gov/report/protein/Ghirsutum_v2_1/Gohir.A11G062700.1.p	Gohir.A11G062700.1.p	G.hirsutum v2.1	5.04e-77	46	290	+/+	seq.submitted 2021-10-26T21:26:24.400Z UTC	583	869	62	351	258.84	132	189	3	925	413
	phytozome-next.jgi.doe.gov/report/protein/Ghirsutum_v2_1/Gohir.D07G075100.1.p	Gohir.D07G075100.1.p	G.hirsutum v2.1	1.69e-76	47	292	+/+	seq.submitted 2021-10-26T21:26:24.400Z UTC	586	875	528	817	269.626	138	191	4	925	875
	phytozome-next.jgi.doe.gov/report/protein/Ghirsutum_v2_1/Gohir.A06G147500.1.p	Gohir.A06G147500.1.p	G.hirsutum v2.1	3.38e-76	47	293	+/+	seq.submitted 2021-10-26T21:26:24.400Z UTC	581	869	66	357	255.758	138	188	5	925	388
	phytozome-next.jgi.doe.gov/report/protein/Ghirsutum_v2_1/Gohir.D10G111600.1.p	Gohir.D10G111600.1.p	G.hirsutum v2.1	3.53e-76	40	354	+/+	seq.submitted 2021-10-26T21:26:24.400Z UTC	521	868	26	373	255.758	143	206	12	925	394
	phytozome-next.jgi.doe.gov/report/protein/Ghirsutum_v2_1/Gohir.D11G143500.1.p	Gohir.D11G143500.1.p	G.hirsutum v2.1	4.98e-76	45	320	+/+	seq.submitted 2021-10-26T21:26:24.400Z UTC	580	889	70	386	256.914	143	196	13	925	430
	phytozome-next.jgi.doe.gov/report/protein/Ghirsutum_v2_1/Gohir.A12G073900.1.p	Gohir.A12G073900.1.p	G.hirsutum v2.1	5.18e-76	49	290	+/+	seq.submitted 2021-10-26T21:26:24.400Z UTC	591	878	441	727	266.159	142	189	5	925	778
	phytozome-next.jgi.doe.gov/report/protein/Ghirsutum_v2_1/Gohir.A10G154400.1.p	Gohir.A10G154400.1.p	G.hirsutum v2.1	5.31e-76	40	360	+/+	seq.submitted 2021-10-26T21:26:24.400Z UTC	521	868	26	373	255.373	145	209	24	925	394
	phytozome-next.jgi.doe.gov/report/protein/Ghirsutum_v2_1/Gohir.A07G095000.1.p	Gohir.A07G095000.1.p	G.hirsutum v2.1	5.54e-76	46	287	+/+	seq.submitted 2021-10-26T21:26:24.400Z UTC	591	875	436	720	266.159	133	190	4	925	779
	phytozome-next.jgi.doe.gov/report/protein/Ghirsutum_v2_1/Gohir.D06G153300.1.p	Gohir.D06G153300.1.p	G.hirsutum v2.1	1.15e-75	47	293	+/+	seq.submitted 2021-10-26T21:26:24.400Z UTC	581	869	66	357	254.218	138	187	5	925	389
	phytozome-next.jgi.doe.gov/report/protein/Ghirsutum_v2_1/Gohir.A05G352400.3.p	Gohir.A05G352400.3.p	G.hirsutum v2.1	1.43e-75	46	323	+/+	seq.submitted 2021-10-26T21:26:24.400Z UTC	557	877	461	771	266.159	147	201	14	925	832
	phytozome-next.jgi.doe.gov/report/protein/Ghirsutum_v2_1/Gohir.A11G137100.1.p	Gohir.A11G137100.1.p	G.hirsutum v2.1	1.44e-75	45	320	+/+	seq.submitted 2021-10-26T21:26:24.400Z UTC	580	889	70	386	255.373	143	194	13	925	430
	phytozome-next.jgi.doe.gov/report/protein/Ghirsutum_v2_1/Gohir.A12G013400.1.p	Gohir.A12G013400.1.p	G.hirsutum v2.1	4.58e-75	40	359	+/+	seq.submitted 2021-10-26T21:26:24.400Z UTC	562	904	39	387	253.062	143	210	26	925	400
	phytozome-next.jgi.doe.gov/report/protein/Ghirsutum_v2_1/Gohir.A11G219800.2.p	Gohir.A11G219800.2.p	G.hirsutum v2.1	4.82e-75	48	293	+/+	seq.submitted 2021-10-26T21:26:24.400Z UTC	588	878	379	668	262.692	140	189	5	925	733
	phytozome-next.jgi.doe.gov/report/protein/Ghirsutum_v2_1/Gohir.D07G099300.1.p	Gohir.D07G099300.1.p	G.hirsutum v2.1	5.31e-75	46	287	+/+	seq.submitted 2021-10-26T21:26:24.400Z UTC	591	875	484	768	264.618	133	189	4	925	832
	phytozome-next.jgi.doe.gov/report/protein/Ghirsutum_v2_1/Gohir.D02G059500.1.p	Gohir.D02G059500.1.p	G.hirsutum v2.1	7.42e-75	46	294	+/+	seq.submitted 2021-10-26T21:26:24.400Z UTC	586	877	508	799	264.618	134	194	4	925	850
	phytozome-next.jgi.doe.gov/report/protein/Ghirsutum_v2_1/Gohir.A06G189550.1.p	Gohir.A06G189550.1.p	G.hirsutum v2.1	1.21e-74	45	302	+/+	seq.submitted 2021-10-26T21:26:24.400Z UTC	584	877	22	309	249.98	137	188	22	925	340
	phytozome-next.jgi.doe.gov/report/protein/Ghirsutum_v2_1/Gohir.A02G054500.1.p	Gohir.A02G054500.1.p	G.hirsutum v2.1	2.01e-74	45	296	+/+	seq.submitted 2021-10-26T21:26:24.400Z UTC	584	877	503	796	263.077	133	195	4	925	847
	phytozome-next.jgi.doe.gov/report/protein/Ghirsutum_v2_1/Gohir.D10G113100.1.p	Gohir.D10G113100.1.p	G.hirsutum v2.1	2.09e-74	37	435	+/+	seq.submitted 2021-10-26T21:26:24.400Z UTC	474	888	404	826	263.848	160	235	32	925	894
	phytozome-next.jgi.doe.gov/report/protein/Ghirsutum_v2_1/Gohir.D10G113100.1.p	Gohir.D10G113100.1.p	G.hirsutum v2.1	0.0423	41	41	+/+	seq.submitted 2021-10-26T21:26:24.400Z UTC	269	308	314	354	39.2762	17	26	1	925	894
	phytozome-next.jgi.doe.gov/report/protein/Ghirsutum_v2_1/Gohir.D10G014000.2.p	Gohir.D10G014000.2.p	G.hirsutum v2.1	2.3e-74	44	293	+/+	seq.submitted 2021-10-26T21:26:24.400Z UTC	581	869	50	342	250.366	130	188	4	925	380
	phytozome-next.jgi.doe.gov/report/protein/Ghirsutum_v2_1/Gohir.A08G192300.2.p	Gohir.A08G192300.2.p	G.hirsutum v2.1	2.34e-74	45	304	+/+	seq.submitted 2021-10-26T21:26:24.400Z UTC	580	880	314	613	260.766	136	199	7	925	736
	phytozome-next.jgi.doe.gov/report/protein/Ghirsutum_v2_1/Gohir.A10G153100.1.p	Gohir.A10G153100.1.p	G.hirsutum v2.1	4.81e-74	37	438	+/+	seq.submitted 2021-10-26T21:26:24.400Z UTC	474	888	404	826	263.077	164	238	38	925	894
	phytozome-next.jgi.doe.gov/report/protein/Ghirsutum_v2_1/Gohir.A10G153100.1.p	Gohir.A10G153100.1.p	G.hirsutum v2.1	0.042	41	41	+/+	seq.submitted 2021-10-26T21:26:24.400Z UTC	269	308	314	354	39.2762	17	26	1	925	894
	phytozome-next.jgi.doe.gov/report/protein/Ghirsutum_v2_1/Gohir.A05G160200.3.p	Gohir.A05G160200.3.p	G.hirsutum v2.1	5.43e-74	43	360	+/+	seq.submitted 2021-10-26T21:26:24.400Z UTC	523	875	564	911	263.848	153	218	19	925	960
	phytozome-next.jgi.doe.gov/report/protein/Ghirsutum_v2_1/Gohir.A05G160200.4.p	Gohir.A05G160200.4.p	G.hirsutum v2.1	5.43e-74	43	360	+/+	seq.submitted 2021-10-26T21:26:24.400Z UTC	523	875	564	911	263.848	153	218	19	925	960
	phytozome-next.jgi.doe.gov/report/protein/Ghirsutum_v2_1/Gohir.A05G160200.2.p	Gohir.A05G160200.2.p	G.hirsutum v2.1	5.43e-74	43	360	+/+	seq.submitted 2021-10-26T21:26:24.400Z UTC	523	875	564	911	263.848	153	218	19	925	960
	phytozome-next.jgi.doe.gov/report/protein/Ghirsutum_v2_1/Gohir.D08G210300.3.p	Gohir.D08G210300.3.p	G.hirsutum v2.1	6.41e-74	45	301	+/+	seq.submitted 2021-10-26T21:26:24.400Z UTC	583	880	273	569	258.455	135	196	7	925	690
	phytozome-next.jgi.doe.gov/report/protein/Ghirsutum_v2_1/Gohir.D05G111700.1.p	Gohir.D05G111700.1.p	G.hirsutum v2.1	6.47e-74	44	291	+/+	seq.submitted 2021-10-26T21:26:24.400Z UTC	584	872	509	797	261.922	128	187	4	925	846
	phytozome-next.jgi.doe.gov/report/protein/Ghirsutum_v2_1/Gohir.D05G111700.1.p	Gohir.D05G111700.1.p	G.hirsutum v2.1	0.00436	28	219	+/+	seq.submitted 2021-10-26T21:26:24.400Z UTC	165	349	188	402	42.3578	61	91	38	925	846
	phytozome-next.jgi.doe.gov/report/protein/Ghirsutum_v2_1/Gohir.D12G014200.1.p	Gohir.D12G014200.1.p	G.hirsutum v2.1	6.98e-74	41	335	+/+	seq.submitted 2021-10-26T21:26:24.400Z UTC	562	880	39	372	249.98	137	200	17	925	400
	phytozome-next.jgi.doe.gov/report/protein/Ghirsutum_v2_1/Gohir.A08G192300.1.p	Gohir.A08G192300.1.p	G.hirsutum v2.1	7.65e-74	45	304	+/+	seq.submitted 2021-10-26T21:26:24.400Z UTC	580	880	357	656	260.381	136	199	7	925	779
	phytozome-next.jgi.doe.gov/report/protein/Ghirsutum_v2_1/Gohir.A05G111300.1.p	Gohir.A05G111300.1.p	G.hirsutum v2.1	9.84e-74	44	291	+/+	seq.submitted 2021-10-26T21:26:24.400Z UTC	584	872	509	797	261.151	128	187	4	925	849
	phytozome-next.jgi.doe.gov/report/protein/Ghirsutum_v2_1/Gohir.A05G111300.1.p	Gohir.A05G111300.1.p	G.hirsutum v2.1	0.00545	28	219	+/+	seq.submitted 2021-10-26T21:26:24.400Z UTC	165	349	188	402	42.3578	62	91	38	925	849
	phytozome-next.jgi.doe.gov/report/protein/Ghirsutum_v2_1/Gohir.D11G109800.2.p	Gohir.D11G109800.2.p	G.hirsutum v2.1	9.94e-74	47	293	+/+	seq.submitted 2021-10-26T21:26:24.400Z UTC	588	878	341	630	258.07	137	190	5	925	695
	phytozome-next.jgi.doe.gov/report/protein/Ghirsutum_v2_1/Gohir.A10G064300.1.p	Gohir.A10G064300.1.p	G.hirsutum v2.1	1.02e-73	28	889	+/+	seq.submitted 2021-10-26T21:26:24.400Z UTC	27	872	42	842	261.536	248	410	131	925	870
	phytozome-next.jgi.doe.gov/report/protein/Ghirsutum_v2_1/Gohir.D02G194500.4.p	Gohir.D02G194500.4.p	G.hirsutum v2.1	1.48e-73	42	329	+/+	seq.submitted 2021-10-26T21:26:24.400Z UTC	568	880	42	369	249.21	137	202	17	925	411
	phytozome-next.jgi.doe.gov/report/protein/Ghirsutum_v2_1/Gohir.D02G194500.2.p	Gohir.D02G194500.2.p	G.hirsutum v2.1	1.48e-73	42	329	+/+	seq.submitted 2021-10-26T21:26:24.400Z UTC	568	880	42	369	249.21	137	202	17	925	411
	phytozome-next.jgi.doe.gov/report/protein/Ghirsutum_v2_1/Gohir.D02G194500.6.p	Gohir.D02G194500.6.p	G.hirsutum v2.1	1.48e-73	42	329	+/+	seq.submitted 2021-10-26T21:26:24.400Z UTC	568	880	42	369	249.21	137	202	17	925	411
	phytozome-next.jgi.doe.gov/report/protein/Ghirsutum_v2_1/Gohir.D02G194500.5.p	Gohir.D02G194500.5.p	G.hirsutum v2.1	1.48e-73	42	329	+/+	seq.submitted 2021-10-26T21:26:24.400Z UTC	568	880	42	369	249.21	137	202	17	925	411
	phytozome-next.jgi.doe.gov/report/protein/Ghirsutum_v2_1/Gohir.A07G129000.3.p	Gohir.A07G129000.3.p	G.hirsutum v2.1	1.68e-73	40	356	+/+	seq.submitted 2021-10-26T21:26:24.400Z UTC	521	869	187	537	254.988	142	212	12	925	605
	phytozome-next.jgi.doe.gov/report/protein/Ghirsutum_v2_1/Gohir.D05G162900.2.p	Gohir.D05G162900.2.p	G.hirsutum v2.1	1.72e-73	42	360	+/+	seq.submitted 2021-10-26T21:26:24.400Z UTC	523	875	530	877	261.922	151	217	19	925	926
	phytozome-next.jgi.doe.gov/report/protein/Ghirsutum_v2_1/Gohir.D08G210300.2.p	Gohir.D08G210300.2.p	G.hirsutum v2.1	1.89e-73	45	301	+/+	seq.submitted 2021-10-26T21:26:24.400Z UTC	583	880	313	609	258.07	135	196	7	925	730
	phytozome-next.jgi.doe.gov/report/protein/Ghirsutum_v2_1/Gohir.A05G135500.2.p	Gohir.A05G135500.2.p	G.hirsutum v2.1	2.04e-73	44	318	+/+	seq.submitted 2021-10-26T21:26:24.400Z UTC	583	887	450	767	260.766	139	200	13	925	863
	phytozome-next.jgi.doe.gov/report/protein/Ghirsutum_v2_1/Gohir.D08G210300.1.p	Gohir.D08G210300.1.p	G.hirsutum v2.1	2.5e-73	45	301	+/+	seq.submitted 2021-10-26T21:26:24.400Z UTC	583	880	360	656	258.84	135	196	7	925	777
	phytozome-next.jgi.doe.gov/report/protein/Ghirsutum_v2_1/Gohir.D02G194500.1.p	Gohir.D02G194500.1.p	G.hirsutum v2.1	2.65e-73	42	329	+/+	seq.submitted 2021-10-26T21:26:24.400Z UTC	568	880	42	369	249.595	137	202	17	925	433
	phytozome-next.jgi.doe.gov/report/protein/Ghirsutum_v2_1/Gohir.D02G194500.3.p	Gohir.D02G194500.3.p	G.hirsutum v2.1	2.65e-73	42	329	+/+	seq.submitted 2021-10-26T21:26:24.400Z UTC	568	880	42	369	249.595	137	202	17	925	433
	phytozome-next.jgi.doe.gov/report/protein/Ghirsutum_v2_1/Gohir.A03G171200.2.p	Gohir.A03G171200.2.p	G.hirsutum v2.1	2.87e-73	41	329	+/+	seq.submitted 2021-10-26T21:26:24.400Z UTC	568	880	42	369	248.44	136	201	17	925	411
	phytozome-next.jgi.doe.gov/report/protein/Ghirsutum_v2_1/Gohir.D05G274600.2.p	Gohir.D05G274600.2.p	G.hirsutum v2.1	2.96e-73	39	382	+/+	seq.submitted 2021-10-26T21:26:24.400Z UTC	522	872	75	455	250.751	149	220	32	925	474
	phytozome-next.jgi.doe.gov/report/protein/Ghirsutum_v2_1/Gohir.A09G213666.1.p	Gohir.A09G213666.1.p	G.hirsutum v2.1	3.17e-73	39	392	+/+	seq.submitted 2021-10-26T21:26:24.400Z UTC	520	888	444	826	260.766	153	223	32	925	896
	phytozome-next.jgi.doe.gov/report/protein/Ghirsutum_v2_1/Gohir.A09G213666.1.p	Gohir.A09G213666.1.p	G.hirsutum v2.1	0.051	40	45	+/+	seq.submitted 2021-10-26T21:26:24.400Z UTC	269	312	314	358	38.891	18	27	1	925	896
	phytozome-next.jgi.doe.gov/report/protein/Ghirsutum_v2_1/Gohir.A05G135500.1.p	Gohir.A05G135500.1.p	G.hirsutum v2.1	3.29e-73	44	318	+/+	seq.submitted 2021-10-26T21:26:24.400Z UTC	583	887	487	804	260.766	139	200	13	925	900
	phytozome-next.jgi.doe.gov/report/protein/Ghirsutum_v2_1/Gohir.D05G162900.1.p	Gohir.D05G162900.1.p	G.hirsutum v2.1	3.68e-73	42	360	+/+	seq.submitted 2021-10-26T21:26:24.400Z UTC	523	875	564	911	261.536	151	217	19	925	960
	phytozome-next.jgi.doe.gov/report/protein/Ghirsutum_v2_1/Gohir.A13G173600.1.p	Gohir.A13G173600.1.p	G.hirsutum v2.1	3.82e-73	44	289	+/+	seq.submitted 2021-10-26T21:26:24.400Z UTC	583	868	125	413	248.825	127	184	3	925	430
	phytozome-next.jgi.doe.gov/report/protein/Ghirsutum_v2_1/Gohir.D05G137500.2.p	Gohir.D05G137500.2.p	G.hirsutum v2.1	4.84e-73	43	318	+/+	seq.submitted 2021-10-26T21:26:24.400Z UTC	583	887	452	769	259.61	138	200	13	925	865
	phytozome-next.jgi.doe.gov/report/protein/Ghirsutum_v2_1/Gohir.D09G215200.1.p	Gohir.D09G215200.1.p	G.hirsutum v2.1	5.03e-73	44	306	+/+	seq.submitted 2021-10-26T21:26:24.400Z UTC	586	888	523	826	259.996	135	195	5	925	896
	phytozome-next.jgi.doe.gov/report/protein/Ghirsutum_v2_1/Gohir.A12G123900.2.p	Gohir.A12G123900.2.p	G.hirsutum v2.1	5.52e-73	39	385	+/+	seq.submitted 2021-10-26T21:26:24.400Z UTC	513	885	188	560	253.832	149	221	24	925	617
	phytozome-next.jgi.doe.gov/report/protein/Ghirsutum_v2_1/Gohir.A11G263400.2.p	Gohir.A11G263400.2.p	G.hirsutum v2.1	5.84e-73	45	289	+/+	seq.submitted 2021-10-26T21:26:24.400Z UTC	583	868	131	419	248.825	129	182	3	925	447
	phytozome-next.jgi.doe.gov/report/protein/Ghirsutum_v2_1/Gohir.A11G263400.1.p	Gohir.A11G263400.1.p	G.hirsutum v2.1	6e-73	45	289	+/+	seq.submitted 2021-10-26T21:26:24.400Z UTC	583	868	132	420	248.825	129	182	3	925	448
	phytozome-next.jgi.doe.gov/report/protein/Ghirsutum_v2_1/Gohir.D05G137500.1.p	Gohir.D05G137500.1.p	G.hirsutum v2.1	8.88e-73	43	318	+/+	seq.submitted 2021-10-26T21:26:24.400Z UTC	583	887	489	806	259.61	138	200	13	925	902
	phytozome-next.jgi.doe.gov/report/protein/Ghirsutum_v2_1/Gohir.A09G038400.3.p	Gohir.A09G038400.3.p	G.hirsutum v2.1	9.67e-73	45	288	+/+	seq.submitted 2021-10-26T21:26:24.400Z UTC	586	869	74	361	247.669	129	188	4	925	432
	phytozome-next.jgi.doe.gov/report/protein/Ghirsutum_v2_1/Gohir.D13G179300.1.p	Gohir.D13G179300.1.p	G.hirsutum v2.1	1.05e-72	44	289	+/+	seq.submitted 2021-10-26T21:26:24.400Z UTC	583	868	125	413	247.669	127	182	3	925	430
	phytozome-next.jgi.doe.gov/report/protein/Ghirsutum_v2_1/Gohir.A07G129000.1.p	Gohir.A07G129000.1.p	G.hirsutum v2.1	1.09e-72	40	362	+/+	seq.submitted 2021-10-26T21:26:24.400Z UTC	515	869	305	661	255.758	143	213	12	925	729
	phytozome-next.jgi.doe.gov/report/protein/Ghirsutum_v2_1/Gohir.A09G038400.2.p	Gohir.A09G038400.2.p	G.hirsutum v2.1	1.14e-72	45	288	+/+	seq.submitted 2021-10-26T21:26:24.400Z UTC	586	869	69	356	247.669	129	188	4	925	427
	phytozome-next.jgi.doe.gov/report/protein/Ghirsutum_v2_1/Gohir.D07G233700.1.p	Gohir.D07G233700.1.p	G.hirsutum v2.1	1.88e-72	41	357	+/+	seq.submitted 2021-10-26T21:26:24.400Z UTC	532	883	468	822	258.455	147	216	7	925	891
	phytozome-next.jgi.doe.gov/report/protein/Ghirsutum_v2_1/Gohir.D11G164800.1.p	Gohir.D11G164800.1.p	G.hirsutum v2.1	2.42e-72	40	381	+/+	seq.submitted 2021-10-26T21:26:24.400Z UTC	510	879	361	735	256.914	151	225	17	925	822
	phytozome-next.jgi.doe.gov/report/protein/Ghirsutum_v2_1/Gohir.D11G273700.1.p	Gohir.D11G273700.1.p	G.hirsutum v2.1	2.92e-72	44	289	+/+	seq.submitted 2021-10-26T21:26:24.400Z UTC	583	868	132	420	246.899	128	180	3	925	448
	phytozome-next.jgi.doe.gov/report/protein/Ghirsutum_v2_1/Gohir.A07G153700.3.p	Gohir.A07G153700.3.p	G.hirsutum v2.1	2.93e-72	41	342	+/+	seq.submitted 2021-10-26T21:26:24.400Z UTC	542	880	232	569	253.832	140	206	7	925	692
	phytozome-next.jgi.doe.gov/report/protein/Ghirsutum_v2_1/Gohir.D11G273700.2.p	Gohir.D11G273700.2.p	G.hirsutum v2.1	2.96e-72	44	289	+/+	seq.submitted 2021-10-26T21:26:24.400Z UTC	583	868	131	419	246.899	128	180	3	925	447
	phytozome-next.jgi.doe.gov/report/protein/Ghirsutum_v2_1/Gohir.A11G158900.1.p	Gohir.A11G158900.1.p	G.hirsutum v2.1	3.18e-72	40	377	+/+	seq.submitted 2021-10-26T21:26:24.400Z UTC	526	890	379	745	256.529	151	225	22	925	823
	phytozome-next.jgi.doe.gov/report/protein/Ghirsutum_v2_1/Gohir.A11G158900.1.p	Gohir.A11G158900.1.p	G.hirsutum v2.1	0.0717	43	46	+/+	seq.submitted 2021-10-26T21:26:24.400Z UTC	269	311	246	291	38.5058	20	30	3	925	823
	1	Gohir.D12G080401.1.p	G.hirsutum v2.1	0	58	941	+/+	seq.submitted 2021-10-26T21:26:24.400Z UTC	1	925	1	922	1013.45	549
		Gohir.D12G080401.2.p	G.hirsutum v2.1	0	58	941	+/+	seq.submitted 2021-10-26T21:26:24.400Z UTC	1	925	1	919	1008.82	544
	2	Gohir.A12G082300.1.p	G.hirsutum v2.1	0	57	941	+/+	seq.submitted 2021-10-26T21:26:24.400Z UTC	1	925	1	922	999.579	541
	Paralogs	Protein/splice variant	Species	E-value	% identity	Align len	Strands	Query ID	Query from	Query to	Target from	Target to	Bitscore
	1	Gohir.D12G080401.1.p	G.hirsutum v2.1	0	58	941	+/+	seq.submitted 2021-10-26T21:26:24.400Z UTC	1	925	1	922	1013.45
		Gohir.D12G080401.2.p	G.hirsutum v2.1	0	58	941	+/+	seq.submitted 2021-10-26T21:26:24.400Z UTC	1	925	1	919	1008.82
	2	Gohir.A12G082300.1.p	G.hirsutum v2.1	0	57	941	+/+	seq.submitted 2021-10-26T21:26:24.400Z UTC	1	925	1	922	999.579
	3	Gohir.D02G154300.3.p	G.hirsutum v2.1	5.09e-127	35	905	+/+	seq.submitted 2021-10-26T21:26:24.400Z UTC	16	875	7	887	407.912
		Gohir.D02G154300.1.p	G.hirsutum v2.1	5.09e-127	35	905	+/+	seq.submitted 2021-10-26T21:26:24.400Z UTC	16	875	7	887	407.912
	4	Gohir.A03G130600.1.p	G.hirsutum v2.1	2.35e-124	35	902	+/+	seq.submitted 2021-10-26T21:26:24.400Z UTC	20	875	7	887	400.979
	5	Gohir.D09G147900.1.p	G.hirsutum v2.1	3.26e-121	34	891	+/+	seq.submitted 2021-10-26T21:26:24.400Z UTC	32	875	28	882	392.504
	6	Gohir.A09G152300.1.p	G.hirsutum v2.1	3.21e-120	34	882	+/+	seq.submitted 2021-10-26T21:26:24.400Z UTC	32	875	28	880	389.808

## Sheet: Manihot
	Views	Protein	Species	E-value	% identity	Align len	Strands	Query ID	Query from	Query to	Target from	Target to	Bitscore	# identical	Positives	Gaps	Query len	Target len
	phytozome-next.jgi.doe.gov/report/protein/Mesculenta_v8_1/Manes.12G121400.1.p	Manes.12G121400.1.p	M.esculenta v8.1	0	61	912	+/+	seq.submitted 2021-10-26T21:29:00.509Z UTC	9	901	8	904	1024.23	555	678	34	925	931
	phytozome-next.jgi.doe.gov/report/protein/Mesculenta_v8_1/Manes.12G121400.2.p	Manes.12G121400.2.p	M.esculenta v8.1	0	59	912	+/+	seq.submitted 2021-10-26T21:29:00.509Z UTC	9	901	8	880	1004.2	539	657	58	925	907
	phytozome-next.jgi.doe.gov/report/protein/Mesculenta_v8_1/Manes.12G017900.1.p	Manes.12G017900.1.p	M.esculenta v8.1	9.46e-125	35	903	+/+	seq.submitted 2021-10-26T21:29:00.509Z UTC	16	878	7	891	401.364	315	466	58	925	935
	phytozome-next.jgi.doe.gov/report/protein/Mesculenta_v8_1/Manes.12G017900.3.p	Manes.12G017900.3.p	M.esculenta v8.1	1.72e-124	36	830	+/+	seq.submitted 2021-10-26T21:29:00.509Z UTC	84	878	96	913	401.364	295	439	47	925	957
	phytozome-next.jgi.doe.gov/report/protein/Mesculenta_v8_1/Manes.12G017900.2.p	Manes.12G017900.2.p	M.esculenta v8.1	3.31e-123	35	903	+/+	seq.submitted 2021-10-26T21:29:00.509Z UTC	16	878	7	889	397.127	315	463	60	925	933
	phytozome-next.jgi.doe.gov/report/protein/Mesculenta_v8_1/Manes.09G080500.9.p	Manes.09G080500.9.p	M.esculenta v8.1	4.15e-122	35	840	+/+	seq.submitted 2021-10-26T21:29:00.509Z UTC	83	878	3	809	392.119	290	433	77	925	856
	phytozome-next.jgi.doe.gov/report/protein/Mesculenta_v8_1/Manes.09G080500.10.p	Manes.09G080500.10.p	M.esculenta v8.1	2.31e-121	35	840	+/+	seq.submitted 2021-10-26T21:29:00.509Z UTC	83	878	72	878	392.119	290	433	77	925	925
	phytozome-next.jgi.doe.gov/report/protein/Mesculenta_v8_1/Manes.09G080500.1.p	Manes.09G080500.1.p	M.esculenta v8.1	2.31e-121	35	840	+/+	seq.submitted 2021-10-26T21:29:00.509Z UTC	83	878	72	878	392.119	290	433	77	925	925
	phytozome-next.jgi.doe.gov/report/protein/Mesculenta_v8_1/Manes.08G002800.1.p	Manes.08G002800.1.p	M.esculenta v8.1	8.07e-121	34	829	+/+	seq.submitted 2021-10-26T21:29:00.509Z UTC	83	878	74	878	390.578	284	421	57	925	925
	phytozome-next.jgi.doe.gov/report/protein/Mesculenta_v8_1/Manes.09G080500.2.p	Manes.09G080500.2.p	M.esculenta v8.1	5.81e-120	34	833	+/+	seq.submitted 2021-10-26T21:29:00.509Z UTC	83	878	72	855	387.882	287	430	86	925	902
	phytozome-next.jgi.doe.gov/report/protein/Mesculenta_v8_1/Manes.12G043301.1.p	Manes.12G043301.1.p	M.esculenta v8.1	2.23e-115	33	931	+/+	seq.submitted 2021-10-26T21:29:00.509Z UTC	14	871	8	891	375.555	308	461	120	925	905
	phytozome-next.jgi.doe.gov/report/protein/Mesculenta_v8_1/Manes.12G045000.2.p	Manes.12G045000.2.p	M.esculenta v8.1	2.8e-115	33	930	+/+	seq.submitted 2021-10-26T21:29:00.509Z UTC	14	871	8	891	375.555	305	455	118	925	905
	phytozome-next.jgi.doe.gov/report/protein/Mesculenta_v8_1/Manes.04G136000.1.p	Manes.04G136000.1.p	M.esculenta v8.1	5.58e-104	31	823	+/+	seq.submitted 2021-10-26T21:29:00.509Z UTC	83	875	117	882	345.51	258	413	87	925	916
	phytozome-next.jgi.doe.gov/report/protein/Mesculenta_v8_1/Manes.11G031075.2.p	Manes.11G031075.2.p	M.esculenta v8.1	6.95e-100	30	824	+/+	seq.submitted 2021-10-26T21:29:00.509Z UTC	92	872	114	877	334.339	250	403	103	925	917
	phytozome-next.jgi.doe.gov/report/protein/Mesculenta_v8_1/Manes.11G029801.1.p	Manes.11G029801.1.p	M.esculenta v8.1	3.37e-99	32	845	+/+	seq.submitted 2021-10-26T21:29:00.509Z UTC	81	875	95	847	331.643	267	395	142	925	876
	phytozome-next.jgi.doe.gov/report/protein/Mesculenta_v8_1/Manes.11G031075.3.p	Manes.11G031075.3.p	M.esculenta v8.1	3.73e-98	30	833	+/+	seq.submitted 2021-10-26T21:29:00.509Z UTC	92	872	114	874	329.717	246	401	124	925	914
	phytozome-next.jgi.doe.gov/report/protein/Mesculenta_v8_1/Manes.11G031000.3.p	Manes.11G031000.3.p	M.esculenta v8.1	6.3e-96	30	832	+/+	seq.submitted 2021-10-26T21:29:00.509Z UTC	92	872	114	876	323.553	251	400	120	925	916
	phytozome-next.jgi.doe.gov/report/protein/Mesculenta_v8_1/Manes.11G031101.1.p	Manes.11G031101.1.p	M.esculenta v8.1	6.82e-96	30	903	+/+	seq.submitted 2021-10-26T21:29:00.509Z UTC	25	872	36	832	322.398	273	427	161	925	872
	phytozome-next.jgi.doe.gov/report/protein/Mesculenta_v8_1/Manes.11G031176.1.p	Manes.11G031176.1.p	M.esculenta v8.1	9.61e-92	30	914	+/+	seq.submitted 2021-10-26T21:29:00.509Z UTC	25	872	36	837	311.227	272	429	178	925	877
	phytozome-next.jgi.doe.gov/report/protein/Mesculenta_v8_1/Manes.11G030900.4.p	Manes.11G030900.4.p	M.esculenta v8.1	1.11e-91	30	826	+/+	seq.submitted 2021-10-26T21:29:00.509Z UTC	92	872	48	807	310.457	244	398	111	925	847
	phytozome-next.jgi.doe.gov/report/protein/Mesculenta_v8_1/Manes.12G017900.5.p	Manes.12G017900.5.p	M.esculenta v8.1	1.89e-91	34	798	+/+	seq.submitted 2021-10-26T21:29:00.509Z UTC	12	769	3	782	308.145	271	395	58	925	783
	phytozome-next.jgi.doe.gov/report/protein/Mesculenta_v8_1/Manes.11G030900.5.p	Manes.11G030900.5.p	M.esculenta v8.1	2.62e-91	30	826	+/+	seq.submitted 2021-10-26T21:29:00.509Z UTC	92	872	115	874	310.842	244	398	111	925	914
	phytozome-next.jgi.doe.gov/report/protein/Mesculenta_v8_1/Manes.12G017900.6.p	Manes.12G017900.6.p	M.esculenta v8.1	4.09e-91	35	721	+/+	seq.submitted 2021-10-26T21:29:00.509Z UTC	84	769	96	804	307.76	250	367	47	925	805
	phytozome-next.jgi.doe.gov/report/protein/Mesculenta_v8_1/Manes.11G030800.1.p	Manes.11G030800.1.p	M.esculenta v8.1	6.81e-83	31	835	+/+	seq.submitted 2021-10-26T21:29:00.509Z UTC	75	872	97	882	287.73	259	402	86	925	922
	phytozome-next.jgi.doe.gov/report/protein/Mesculenta_v8_1/Manes.15G084200.2.p	Manes.15G084200.2.p	M.esculenta v8.1	9.38e-82	42	379	+/+	seq.submitted 2021-10-26T21:29:00.509Z UTC	523	887	274	645	279.641	158	226	21	925	698
	phytozome-next.jgi.doe.gov/report/protein/Mesculenta_v8_1/Manes.15G084200.1.p	Manes.15G084200.1.p	M.esculenta v8.1	3.13e-80	42	379	+/+	seq.submitted 2021-10-26T21:29:00.509Z UTC	523	887	420	791	278.87	158	226	21	925	844
	phytozome-next.jgi.doe.gov/report/protein/Mesculenta_v8_1/Manes.04G086900.1.p	Manes.04G086900.1.p	M.esculenta v8.1	6.21e-79	47	297	+/+	seq.submitted 2021-10-26T21:29:00.509Z UTC	586	880	498	791	275.404	139	198	5	925	859
	phytozome-next.jgi.doe.gov/report/protein/Mesculenta_v8_1/Manes.10G038700.1.p	Manes.10G038700.1.p	M.esculenta v8.1	2.01e-78	43	367	+/+	seq.submitted 2021-10-26T21:29:00.509Z UTC	521	877	407	760	273.092	156	221	23	925	817
	phytozome-next.jgi.doe.gov/report/protein/Mesculenta_v8_1/Manes.10G038700.2.p	Manes.10G038700.2.p	M.esculenta v8.1	2.35e-78	43	367	+/+	seq.submitted 2021-10-26T21:29:00.509Z UTC	521	877	407	760	273.092	156	221	23	925	813
	phytozome-next.jgi.doe.gov/report/protein/Mesculenta_v8_1/Manes.04G029000.1.p	Manes.04G029000.1.p	M.esculenta v8.1	2.02e-77	42	350	+/+	seq.submitted 2021-10-26T21:29:00.509Z UTC	536	876	423	769	270.781	147	214	12	925	831
	phytozome-next.jgi.doe.gov/report/protein/Mesculenta_v8_1/Manes.01G132200.1.p	Manes.01G132200.1.p	M.esculenta v8.1	3.31e-77	46	289	+/+	seq.submitted 2021-10-26T21:29:00.509Z UTC	586	868	76	364	258.455	134	185	6	925	400
	phytozome-next.jgi.doe.gov/report/protein/Mesculenta_v8_1/Manes.07G107000.1.p	Manes.07G107000.1.p	M.esculenta v8.1	5.54e-77	47	294	+/+	seq.submitted 2021-10-26T21:29:00.509Z UTC	586	877	473	763	269.24	138	195	5	925	819
	phytozome-next.jgi.doe.gov/report/protein/Mesculenta_v8_1/Manes.11G091100.1.p	Manes.11G091100.1.p	M.esculenta v8.1	6.38e-77	46	297	+/+	seq.submitted 2021-10-26T21:29:00.509Z UTC	586	880	493	786	269.626	136	197	5	925	851
	phytozome-next.jgi.doe.gov/report/protein/Mesculenta_v8_1/Manes.12G114700.3.p	Manes.12G114700.3.p	M.esculenta v8.1	1.25e-76	48	289	+/+	seq.submitted 2021-10-26T21:29:00.509Z UTC	599	887	330	615	265.003	138	185	3	925	669
	phytozome-next.jgi.doe.gov/report/protein/Mesculenta_v8_1/Manes.02G057700.1.p	Manes.02G057700.1.p	M.esculenta v8.1	1.39e-76	44	367	+/+	seq.submitted 2021-10-26T21:29:00.509Z UTC	540	897	462	817	268.855	160	222	20	925	851
	phytozome-next.jgi.doe.gov/report/protein/Mesculenta_v8_1/Manes.13G117700.8.p	Manes.13G117700.8.p	M.esculenta v8.1	1.48e-76	42	383	+/+	seq.submitted 2021-10-26T21:29:00.509Z UTC	512	878	420	798	268.855	159	226	20	925	861
	phytozome-next.jgi.doe.gov/report/protein/Mesculenta_v8_1/Manes.13G117700.4.p	Manes.13G117700.4.p	M.esculenta v8.1	1.48e-76	42	383	+/+	seq.submitted 2021-10-26T21:29:00.509Z UTC	512	878	420	798	268.855	159	226	20	925	861
	phytozome-next.jgi.doe.gov/report/protein/Mesculenta_v8_1/Manes.13G117700.6.p	Manes.13G117700.6.p	M.esculenta v8.1	1.48e-76	42	383	+/+	seq.submitted 2021-10-26T21:29:00.509Z UTC	512	878	420	798	268.855	159	226	20	925	861
	phytozome-next.jgi.doe.gov/report/protein/Mesculenta_v8_1/Manes.13G117700.3.p	Manes.13G117700.3.p	M.esculenta v8.1	1.48e-76	42	383	+/+	seq.submitted 2021-10-26T21:29:00.509Z UTC	512	878	420	798	268.855	159	226	20	925	861
	phytozome-next.jgi.doe.gov/report/protein/Mesculenta_v8_1/Manes.13G117700.7.p	Manes.13G117700.7.p	M.esculenta v8.1	1.48e-76	42	383	+/+	seq.submitted 2021-10-26T21:29:00.509Z UTC	512	878	420	798	268.855	159	226	20	925	861
	phytozome-next.jgi.doe.gov/report/protein/Mesculenta_v8_1/Manes.13G117700.5.p	Manes.13G117700.5.p	M.esculenta v8.1	1.48e-76	42	383	+/+	seq.submitted 2021-10-26T21:29:00.509Z UTC	512	878	420	798	268.855	159	226	20	925	861
	phytozome-next.jgi.doe.gov/report/protein/Mesculenta_v8_1/Manes.11G136800.2.p	Manes.11G136800.2.p	M.esculenta v8.1	1.73e-76	46	293	+/+	seq.submitted 2021-10-26T21:29:00.509Z UTC	585	875	282	570	263.462	134	191	6	925	635
	phytozome-next.jgi.doe.gov/report/protein/Mesculenta_v8_1/Manes.09G151300.1.p	Manes.09G151300.1.p	M.esculenta v8.1	5.43e-76	45	297	+/+	seq.submitted 2021-10-26T21:29:00.509Z UTC	584	878	505	799	267.314	135	197	4	925	852
	phytozome-next.jgi.doe.gov/report/protein/Mesculenta_v8_1/Manes.12G114700.2.p	Manes.12G114700.2.p	M.esculenta v8.1	9.06e-76	48	289	+/+	seq.submitted 2021-10-26T21:29:00.509Z UTC	599	887	501	786	266.159	138	185	3	925	840
	phytozome-next.jgi.doe.gov/report/protein/Mesculenta_v8_1/Manes.09G122900.1.p	Manes.09G122900.1.p	M.esculenta v8.1	2.74e-75	38	412	+/+	seq.submitted 2021-10-26T21:29:00.509Z UTC	499	890	427	828	265.774	158	230	30	925	894
	phytozome-next.jgi.doe.gov/report/protein/Mesculenta_v8_1/Manes.09G122900.2.p	Manes.09G122900.2.p	M.esculenta v8.1	2.74e-75	38	412	+/+	seq.submitted 2021-10-26T21:29:00.509Z UTC	499	890	427	828	265.774	158	230	30	925	894
	phytozome-next.jgi.doe.gov/report/protein/Mesculenta_v8_1/Manes.11G136800.1.p	Manes.11G136800.1.p	M.esculenta v8.1	2.95e-75	46	287	+/+	seq.submitted 2021-10-26T21:29:00.509Z UTC	591	875	485	769	264.618	132	189	4	925	834
	phytozome-next.jgi.doe.gov/report/protein/Mesculenta_v8_1/Manes.02G057000.1.p	Manes.02G057000.1.p	M.esculenta v8.1	7.95e-75	47	298	+/+	seq.submitted 2021-10-26T21:29:00.509Z UTC	584	878	518	811	264.618	140	192	7	925	891
	phytozome-next.jgi.doe.gov/report/protein/Mesculenta_v8_1/Manes.01G102400.1.p	Manes.01G102400.1.p	M.esculenta v8.1	1.08e-74	46	315	+/+	seq.submitted 2021-10-26T21:29:00.509Z UTC	586	891	499	811	263.848	144	200	11	925	871
	phytozome-next.jgi.doe.gov/report/protein/Mesculenta_v8_1/Manes.14G095000.1.p	Manes.14G095000.1.p	M.esculenta v8.1	1.76e-74	40	386	+/+	seq.submitted 2021-10-26T21:29:00.509Z UTC	518	869	282	661	259.996	153	217	40	925	715
	phytozome-next.jgi.doe.gov/report/protein/Mesculenta_v8_1/Manes.08G170100.3.p	Manes.08G170100.3.p	M.esculenta v8.1	2.21e-74	38	407	+/+	seq.submitted 2021-10-26T21:29:00.509Z UTC	499	885	236	632	259.61	154	228	30	925	703
	phytozome-next.jgi.doe.gov/report/protein/Mesculenta_v8_1/Manes.08G170100.3.p	Manes.08G170100.3.p	M.esculenta v8.1	0.0949	39	46	+/+	seq.submitted 2021-10-26T21:29:00.509Z UTC	269	313	120	165	37.3502	18	27	1	925	703
	phytozome-next.jgi.doe.gov/report/protein/Mesculenta_v8_1/Manes.12G114600.1.p	Manes.12G114600.1.p	M.esculenta v8.1	4.14e-74	46	299	+/+	seq.submitted 2021-10-26T21:29:00.509Z UTC	591	887	457	752	260.381	139	187	5	925	784
	phytozome-next.jgi.doe.gov/report/protein/Mesculenta_v8_1/Manes.03G204900.1.p	Manes.03G204900.1.p	M.esculenta v8.1	4.63e-74	43	309	+/+	seq.submitted 2021-10-26T21:29:00.509Z UTC	584	889	509	817	261.922	133	196	3	925	859
	phytozome-next.jgi.doe.gov/report/protein/Mesculenta_v8_1/Manes.03G204900.1.p	Manes.03G204900.1.p	M.esculenta v8.1	0.0122	24	206	+/+	seq.submitted 2021-10-26T21:29:00.509Z UTC	129	308	155	347	40.4318	49	86	39	925	859
	phytozome-next.jgi.doe.gov/report/protein/Mesculenta_v8_1/Manes.12G049502.2.p	Manes.12G049502.2.p	M.esculenta v8.1	4.8e-74	45	293	+/+	seq.submitted 2021-10-26T21:29:00.509Z UTC	580	868	64	356	249.98	133	189	4	925	406
	phytozome-next.jgi.doe.gov/report/protein/Mesculenta_v8_1/Manes.01G102100.1.p	Manes.01G102100.1.p	M.esculenta v8.1	5.26e-74	39	386	+/+	seq.submitted 2021-10-26T21:29:00.509Z UTC	510	888	438	818	262.307	150	230	12	925	886
	phytozome-next.jgi.doe.gov/report/protein/Mesculenta_v8_1/Manes.02G057500.1.p	Manes.02G057500.1.p	M.esculenta v8.1	6.82e-74	41	401	+/+	seq.submitted 2021-10-26T21:29:00.509Z UTC	512	897	439	825	261.536	164	230	29	925	866
	phytozome-next.jgi.doe.gov/report/protein/Mesculenta_v8_1/Manes.01G155000.1.p	Manes.01G155000.1.p	M.esculenta v8.1	7.2e-74	44	312	+/+	seq.submitted 2021-10-26T21:29:00.509Z UTC	578	876	69	379	249.98	137	195	14	925	416
	phytozome-next.jgi.doe.gov/report/protein/Mesculenta_v8_1/Manes.15G004400.1.p	Manes.15G004400.1.p	M.esculenta v8.1	1.3e-73	40	348	+/+	seq.submitted 2021-10-26T21:29:00.509Z UTC	586	925	505	852	260.381	140	208	8	925	853
	phytozome-next.jgi.doe.gov/report/protein/Mesculenta_v8_1/Manes.13G045200.1.p	Manes.13G045200.1.p	M.esculenta v8.1	2.02e-73	46	293	+/+	seq.submitted 2021-10-26T21:29:00.509Z UTC	580	868	58	350	248.44	135	187	4	925	411
	phytozome-next.jgi.doe.gov/report/protein/Mesculenta_v8_1/Manes.06G076000.1.p	Manes.06G076000.1.p	M.esculenta v8.1	2.3e-73	40	386	+/+	seq.submitted 2021-10-26T21:29:00.509Z UTC	519	869	342	718	258.07	153	226	44	925	772
	phytozome-next.jgi.doe.gov/report/protein/Mesculenta_v8_1/Manes.06G089401.1.p	Manes.06G089401.1.p	M.esculenta v8.1	2.38e-73	46	296	+/+	seq.submitted 2021-10-26T21:29:00.509Z UTC	586	879	1044	1336	265.388	137	193	5	925	1561
	phytozome-next.jgi.doe.gov/report/protein/Mesculenta_v8_1/Manes.14G123800.1.p	Manes.14G123800.1.p	M.esculenta v8.1	2.52e-73	40	367	+/+	seq.submitted 2021-10-26T21:29:00.509Z UTC	522	872	433	795	259.61	148	215	20	925	845
	phytozome-next.jgi.doe.gov/report/protein/Mesculenta_v8_1/Manes.14G123800.1.p	Manes.14G123800.1.p	M.esculenta v8.1	2.51e-05	30	189	+/+	seq.submitted 2021-10-26T21:29:00.509Z UTC	182	349	219	403	49.2914	56	79	25	925	845
	phytozome-next.jgi.doe.gov/report/protein/Mesculenta_v8_1/Manes.02G057300.1.p	Manes.02G057300.1.p	M.esculenta v8.1	2.52e-73	46	298	+/+	seq.submitted 2021-10-26T21:29:00.509Z UTC	584	878	518	811	260.381	137	191	7	925	891
	phytozome-next.jgi.doe.gov/report/protein/Mesculenta_v8_1/Manes.02G113800.3.p	Manes.02G113800.3.p	M.esculenta v8.1	3.54e-73	43	312	+/+	seq.submitted 2021-10-26T21:29:00.509Z UTC	571	869	57	367	247.669	133	197	14	925	409
	phytozome-next.jgi.doe.gov/report/protein/Mesculenta_v8_1/Manes.02G113800.6.p	Manes.02G113800.6.p	M.esculenta v8.1	3.54e-73	43	312	+/+	seq.submitted 2021-10-26T21:29:00.509Z UTC	571	869	57	367	247.669	133	197	14	925	409
	phytozome-next.jgi.doe.gov/report/protein/Mesculenta_v8_1/Manes.01G102500.1.p	Manes.01G102500.1.p	M.esculenta v8.1	4.44e-73	41	382	+/+	seq.submitted 2021-10-26T21:29:00.509Z UTC	510	878	438	815	259.225	158	222	17	925	872
	phytozome-next.jgi.doe.gov/report/protein/Mesculenta_v8_1/Manes.01G107400.1.p	Manes.01G107400.1.p	M.esculenta v8.1	7.19e-73	43	322	+/+	seq.submitted 2021-10-26T21:29:00.509Z UTC	561	868	336	655	255.758	137	206	16	925	723
	phytozome-next.jgi.doe.gov/report/protein/Mesculenta_v8_1/Manes.08G166400.1.p	Manes.08G166400.1.p	M.esculenta v8.1	7.81e-73	43	324	+/+	seq.submitted 2021-10-26T21:29:00.509Z UTC	583	896	72	392	247.669	138	199	13	925	433
	phytozome-next.jgi.doe.gov/report/protein/Mesculenta_v8_1/Manes.08G122900.1.p	Manes.08G122900.1.p	M.esculenta v8.1	8.63e-73	45	289	+/+	seq.submitted 2021-10-26T21:29:00.509Z UTC	583	868	128	414	247.284	130	184	5	925	423
	phytozome-next.jgi.doe.gov/report/protein/Mesculenta_v8_1/Manes.07G116800.1.p	Manes.07G116800.1.p	M.esculenta v8.1	9.1e-73	40	344	+/+	seq.submitted 2021-10-26T21:29:00.509Z UTC	564	894	35	375	246.514	137	213	16	925	410
	phytozome-next.jgi.doe.gov/report/protein/Mesculenta_v8_1/Manes.08G170100.4.p	Manes.08G170100.4.p	M.esculenta v8.1	9.39e-73	38	407	+/+	seq.submitted 2021-10-26T21:29:00.509Z UTC	499	885	425	821	258.84	154	228	30	925	892
	phytozome-next.jgi.doe.gov/report/protein/Mesculenta_v8_1/Manes.08G170100.4.p	Manes.08G170100.4.p	M.esculenta v8.1	0.0946	39	46	+/+	seq.submitted 2021-10-26T21:29:00.509Z UTC	269	313	309	354	37.7354	18	27	1	925	892
	phytozome-next.jgi.doe.gov/report/protein/Mesculenta_v8_1/Manes.01G093550.1.p	Manes.01G093550.1.p	M.esculenta v8.1	3.74e-72	44	307	+/+	seq.submitted 2021-10-26T21:29:00.509Z UTC	586	888	511	815	256.914	135	195	6	925	886
	phytozome-next.jgi.doe.gov/report/protein/Mesculenta_v8_1/Manes.17G057900.1.p	Manes.17G057900.1.p	M.esculenta v8.1	4.84e-72	33	496	+/+	seq.submitted 2021-10-26T21:29:00.509Z UTC	409	894	122	584	250.751	165	261	43	925	616
	phytozome-next.jgi.doe.gov/report/protein/Mesculenta_v8_1/Manes.01G253500.1.p	Manes.01G253500.1.p	M.esculenta v8.1	7.61e-72	46	286	+/+	seq.submitted 2021-10-26T21:29:00.509Z UTC	586	869	142	426	246.514	132	189	3	925	487
	phytozome-next.jgi.doe.gov/report/protein/Mesculenta_v8_1/Manes.01G093700.1.p	Manes.01G093700.1.p	M.esculenta v8.1	1.17e-71	45	302	+/+	seq.submitted 2021-10-26T21:29:00.509Z UTC	586	883	506	805	255.373	135	192	6	925	881
	phytozome-next.jgi.doe.gov/report/protein/Mesculenta_v8_1/Manes.12G006800.1.p	Manes.12G006800.1.p	M.esculenta v8.1	1.72e-71	44	300	+/+	seq.submitted 2021-10-26T21:29:00.509Z UTC	573	868	61	360	244.973	132	184	4	925	464
	phytozome-next.jgi.doe.gov/report/protein/Mesculenta_v8_1/Manes.08G165600.11.p	Manes.08G165600.11.p	M.esculenta v8.1	2.72e-71	45	295	+/+	seq.submitted 2021-10-26T21:29:00.509Z UTC	586	878	542	832	254.603	132	187	6	925	888
	phytozome-next.jgi.doe.gov/report/protein/Mesculenta_v8_1/Manes.03G126500.2.p	Manes.03G126500.2.p	M.esculenta v8.1	4.14e-71	44	294	+/+	seq.submitted 2021-10-26T21:29:00.509Z UTC	580	869	58	351	240.736	130	182	4	925	374
	phytozome-next.jgi.doe.gov/report/protein/Mesculenta_v8_1/Manes.13G007000.1.p	Manes.13G007000.1.p	M.esculenta v8.1	4.21e-71	42	338	+/+	seq.submitted 2021-10-26T21:29:00.509Z UTC	568	901	55	384	243.817	141	201	12	925	463
	phytozome-next.jgi.doe.gov/report/protein/Mesculenta_v8_1/Manes.02G065300.1.p	Manes.02G065300.1.p	M.esculenta v8.1	5.43e-71	43	312	+/+	seq.submitted 2021-10-26T21:29:00.509Z UTC	571	869	353	662	250.751	134	198	15	925	729
	phytozome-next.jgi.doe.gov/report/protein/Mesculenta_v8_1/Manes.12G039400.4.p	Manes.12G039400.4.p	M.esculenta v8.1	6.07e-71	37	430	+/+	seq.submitted 2021-10-26T21:29:00.509Z UTC	471	880	216	629	251.136	158	240	36	925	752
	phytozome-next.jgi.doe.gov/report/protein/Mesculenta_v8_1/Manes.12G039400.2.p	Manes.12G039400.2.p	M.esculenta v8.1	6.13e-71	37	430	+/+	seq.submitted 2021-10-26T21:29:00.509Z UTC	471	880	227	640	251.136	158	240	36	925	763
	phytozome-next.jgi.doe.gov/report/protein/Mesculenta_v8_1/Manes.13G007000.2.p	Manes.13G007000.2.p	M.esculenta v8.1	6.5e-71	42	338	+/+	seq.submitted 2021-10-26T21:29:00.509Z UTC	568	901	76	405	243.817	141	201	12	925	484
	phytozome-next.jgi.doe.gov/report/protein/Mesculenta_v8_1/Manes.01G094800.1.p	Manes.01G094800.1.p	M.esculenta v8.1	6.79e-71	38	374	+/+	seq.submitted 2021-10-26T21:29:00.509Z UTC	506	875	494	846	254.603	143	215	25	925	962
	phytozome-next.jgi.doe.gov/report/protein/Mesculenta_v8_1/Manes.01G094800.1.p	Manes.01G094800.1.p	M.esculenta v8.1	0.00113	25	206	+/+	seq.submitted 2021-10-26T21:29:00.509Z UTC	166	349	270	469	43.8986	52	89	28	925	962
	phytozome-next.jgi.doe.gov/report/protein/Mesculenta_v8_1/Manes.10G029800.1.p	Manes.10G029800.1.p	M.esculenta v8.1	9.02e-71	41	326	+/+	seq.submitted 2021-10-26T21:29:00.509Z UTC	569	880	42	362	241.121	133	203	19	925	410
	phytozome-next.jgi.doe.gov/report/protein/Mesculenta_v8_1/Manes.15G073500.1.p	Manes.15G073500.1.p	M.esculenta v8.1	9.49e-71	42	305	+/+	seq.submitted 2021-10-26T21:29:00.509Z UTC	580	880	60	364	240.35	129	188	4	925	387
	phytozome-next.jgi.doe.gov/report/protein/Mesculenta_v8_1/Manes.12G039400.3.p	Manes.12G039400.3.p	M.esculenta v8.1	9.78e-71	37	417	+/+	seq.submitted 2021-10-26T21:29:00.509Z UTC	484	880	238	639	250.751	154	235	35	925	762
	phytozome-next.jgi.doe.gov/report/protein/Mesculenta_v8_1/Manes.04G067100.3.p	Manes.04G067100.3.p	M.esculenta v8.1	9.84e-71	41	324	+/+	seq.submitted 2021-10-26T21:29:00.509Z UTC	562	869	55	377	241.506	134	197	17	925	426
	phytozome-next.jgi.doe.gov/report/protein/Mesculenta_v8_1/Manes.08G165600.4.p	Manes.08G165600.4.p	M.esculenta v8.1	9.88e-71	45	295	+/+	seq.submitted 2021-10-26T21:29:00.509Z UTC	586	878	616	906	253.832	132	187	6	925	962
	phytozome-next.jgi.doe.gov/report/protein/Mesculenta_v8_1/Manes.08G165600.4.p	Manes.08G165600.4.p	M.esculenta v8.1	0.0014	35	86	+/+	seq.submitted 2021-10-26T21:29:00.509Z UTC	357	441	25	99	43.5134	30	43	12	925	962
	phytozome-next.jgi.doe.gov/report/protein/Mesculenta_v8_1/Manes.08G165600.8.p	Manes.08G165600.8.p	M.esculenta v8.1	9.88e-71	45	295	+/+	seq.submitted 2021-10-26T21:29:00.509Z UTC	586	878	616	906	253.832	132	187	6	925	962
	phytozome-next.jgi.doe.gov/report/protein/Mesculenta_v8_1/Manes.08G165600.8.p	Manes.08G165600.8.p	M.esculenta v8.1	0.0014	35	86	+/+	seq.submitted 2021-10-26T21:29:00.509Z UTC	357	441	25	99	43.5134	30	43	12	925	962
	phytozome-next.jgi.doe.gov/report/protein/Mesculenta_v8_1/Manes.08G165600.9.p	Manes.08G165600.9.p	M.esculenta v8.1	9.88e-71	45	295	+/+	seq.submitted 2021-10-26T21:29:00.509Z UTC	586	878	616	906	253.832	132	187	6	925	962
	phytozome-next.jgi.doe.gov/report/protein/Mesculenta_v8_1/Manes.08G165600.9.p	Manes.08G165600.9.p	M.esculenta v8.1	0.0014	35	86	+/+	seq.submitted 2021-10-26T21:29:00.509Z UTC	357	441	25	99	43.5134	30	43	12	925	962
	phytozome-next.jgi.doe.gov/report/protein/Mesculenta_v8_1/Manes.08G165600.7.p	Manes.08G165600.7.p	M.esculenta v8.1	9.88e-71	45	295	+/+	seq.submitted 2021-10-26T21:29:00.509Z UTC	586	878	616	906	253.832	132	187	6	925	962
	phytozome-next.jgi.doe.gov/report/protein/Mesculenta_v8_1/Manes.08G165600.7.p	Manes.08G165600.7.p	M.esculenta v8.1	0.0014	35	86	+/+	seq.submitted 2021-10-26T21:29:00.509Z UTC	357	441	25	99	43.5134	30	43	12	925	962
	phytozome-next.jgi.doe.gov/report/protein/Mesculenta_v8_1/Manes.12G039400.1.p	Manes.12G039400.1.p	M.esculenta v8.1	1.06e-70	37	417	+/+	seq.submitted 2021-10-26T21:29:00.509Z UTC	484	880	227	628	250.366	154	235	35	925	751
	phytozome-next.jgi.doe.gov/report/protein/Mesculenta_v8_1/Manes.08G165600.10.p	Manes.08G165600.10.p	M.esculenta v8.1	1.09e-70	45	295	+/+	seq.submitted 2021-10-26T21:29:00.509Z UTC	586	878	613	903	253.832	132	187	6	925	959
	phytozome-next.jgi.doe.gov/report/protein/Mesculenta_v8_1/Manes.08G165600.10.p	Manes.08G165600.10.p	M.esculenta v8.1	0.00138	35	86	+/+	seq.submitted 2021-10-26T21:29:00.509Z UTC	357	441	25	99	43.5134	30	43	12	925	959
	phytozome-next.jgi.doe.gov/report/protein/Mesculenta_v8_1/Manes.09G093000.1.p	Manes.09G093000.1.p	M.esculenta v8.1	1.25e-70	40	338	+/+	seq.submitted 2021-10-26T21:29:00.509Z UTC	557	877	33	367	240.35	135	207	20	925	396
	phytozome-next.jgi.doe.gov/report/protein/Mesculenta_v8_1/Manes.01G127900.1.p	Manes.01G127900.1.p	M.esculenta v8.1	1.27e-70	45	286	+/+	seq.submitted 2021-10-26T21:29:00.509Z UTC	586	869	175	459	243.817	128	184	3	925	507
	phytozome-next.jgi.doe.gov/report/protein/Mesculenta_v8_1/Manes.05G004800.5.p	Manes.05G004800.5.p	M.esculenta v8.1	1.51e-70	42	316	+/+	seq.submitted 2021-10-26T21:29:00.509Z UTC	582	892	209	517	245.358	134	195	12	925	569
	phytozome-next.jgi.doe.gov/report/protein/Mesculenta_v8_1/Manes.05G004800.4.p	Manes.05G004800.4.p	M.esculenta v8.1	1.51e-70	42	316	+/+	seq.submitted 2021-10-26T21:29:00.509Z UTC	582	892	209	517	245.358	134	195	12	925	569
	phytozome-next.jgi.doe.gov/report/protein/Mesculenta_v8_1/Manes.14G162000.1.p	Manes.14G162000.1.p	M.esculenta v8.1	1.6e-70	46	290	+/+	seq.submitted 2021-10-26T21:29:00.509Z UTC	586	872	638	923	253.447	134	188	7	925	972
	phytozome-next.jgi.doe.gov/report/protein/Mesculenta_v8_1/Manes.14G162000.1.p	Manes.14G162000.1.p	M.esculenta v8.1	0.00338	36	96	+/+	seq.submitted 2021-10-26T21:29:00.509Z UTC	348	442	32	116	42.3578	35	48	12	925	972
	phytozome-next.jgi.doe.gov/report/protein/Mesculenta_v8_1/Manes.14G162000.3.p	Manes.14G162000.3.p	M.esculenta v8.1	2.01e-70	46	290	+/+	seq.submitted 2021-10-26T21:29:00.509Z UTC	586	872	634	919	253.062	134	188	7	925	968
	phytozome-next.jgi.doe.gov/report/protein/Mesculenta_v8_1/Manes.14G162000.3.p	Manes.14G162000.3.p	M.esculenta v8.1	0.00353	36	96	+/+	seq.submitted 2021-10-26T21:29:00.509Z UTC	348	442	32	116	42.3578	35	48	12	925	968
	Paralogs	Protein/splice variant	Species	E-value	% identity	Align len	Strands	Query ID	Query from	Query to	Target from	Target to	Bitscore
	1	Manes.04G136000.1.p	M.esculenta v8.1	5.58e-104	31	823	+/+	seq.submitted 2021-10-26T21:29:00.509Z UTC	83	875	117	882	345.51
	2	Manes.08G002800.1.p	M.esculenta v8.1	8.07e-121	34	829	+/+	seq.submitted 2021-10-26T21:29:00.509Z UTC	83	878	74	878	390.578
	3	Manes.09G080500.1.p	M.esculenta v8.1	2.31e-121	35	840	+/+	seq.submitted 2021-10-26T21:29:00.509Z UTC	83	878	72	878	392.119
		Manes.09G080500.10.p	M.esculenta v8.1	2.31e-121	35	840	+/+	seq.submitted 2021-10-26T21:29:00.509Z UTC	83	878	72	878	392.119
		Manes.09G080500.2.p	M.esculenta v8.1	5.81e-120	34	833	+/+	seq.submitted 2021-10-26T21:29:00.509Z UTC	83	878	72	855	387.882
	4	Manes.09G080500.9.p	M.esculenta v8.1	4.15e-122	35	840	+/+	seq.submitted 2021-10-26T21:29:00.509Z UTC	83	878	3	809	392.119
	5	Manes.11G031075.2.p	M.esculenta v8.1	6.95e-100	30	824	+/+	seq.submitted 2021-10-26T21:29:00.509Z UTC	92	872	114	877	334.339
	6	Manes.12G017900.1.p	M.esculenta v8.1	9.46e-125	35	903	+/+	seq.submitted 2021-10-26T21:29:00.509Z UTC	16	878	7	891	401.364
		Manes.12G017900.2.p	M.esculenta v8.1	3.31e-123	35	903	+/+	seq.submitted 2021-10-26T21:29:00.509Z UTC	16	878	7	889	397.127
		Manes.12G017900.3.p	M.esculenta v8.1	1.72e-124	36	830	+/+	seq.submitted 2021-10-26T21:29:00.509Z UTC	84	878	96	913	401.364
	7	Manes.12G043301.1.p	M.esculenta v8.1	2.23e-115	33	931	+/+	seq.submitted 2021-10-26T21:29:00.509Z UTC	14	871	8	891	375.555
	8	Manes.12G045000.2.p	M.esculenta v8.1	2.8e-115	33	930	+/+	seq.submitted 2021-10-26T21:29:00.509Z UTC	14	871	8	891	375.555
	9	Manes.12G121400.1.p	M.esculenta v8.1	0	61	912	+/+	seq.submitted 2021-10-26T21:29:00.509Z UTC	9	901	8	904	1024.23
		Manes.12G121400.2.p	M.esculenta v8.1	0	59	912	+/+	seq.submitted 2021-10-26T21:29:00.509Z UTC	9	901	8	880	1004.2

## Sheet: Zea
	Views	Protein	Species	E-value	% identity	Align len	Strands	Query ID	Query from	Query to	Target from	Target to	Bitscore	# identical	Positives	Gaps	Query len	Target len
	phytozome-next.jgi.doe.gov/report/protein/Zmays_RefGen_V4/Zm00001d021829_P001	Zm00001d021829_P001	Z.mays RefGen_V4	0	55	557	+/+	seq.submitted 2021-10-26T21:30:50.291Z UTC	363	901	29	555	591.652	306	389	48	925	580
	phytozome-next.jgi.doe.gov/report/protein/Zmays_RefGen_V4/Zm00001d021829_P002	Zm00001d021829_P002	Z.mays RefGen_V4	0	56	543	+/+	seq.submitted 2021-10-26T21:30:50.291Z UTC	363	901	29	532	583.563	303	382	43	925	557
	phytozome-next.jgi.doe.gov/report/protein/Zmays_RefGen_V4/Zm00001d052306_P003	Zm00001d052306_P003	Z.mays RefGen_V4	5.77e-110	33	866	+/+	seq.submitted 2021-10-26T21:30:50.291Z UTC	83	898	77	909	362.459	283	429	83	925	915
	phytozome-next.jgi.doe.gov/report/protein/Zmays_RefGen_V4/Zm00001d052306_P005	Zm00001d052306_P005	Z.mays RefGen_V4	5.77e-110	33	866	+/+	seq.submitted 2021-10-26T21:30:50.291Z UTC	83	898	77	909	362.459	283	429	83	925	915
	phytozome-next.jgi.doe.gov/report/protein/Zmays_RefGen_V4/Zm00001d052306_P002	Zm00001d052306_P002	Z.mays RefGen_V4	1.08e-108	32	877	+/+	seq.submitted 2021-10-26T21:30:50.291Z UTC	83	898	77	910	358.992	283	427	104	925	916
	phytozome-next.jgi.doe.gov/report/protein/Zmays_RefGen_V4/Zm00001d052306_P004	Zm00001d052306_P004	Z.mays RefGen_V4	1.08e-108	32	877	+/+	seq.submitted 2021-10-26T21:30:50.291Z UTC	83	898	77	910	358.992	283	427	104	925	916
	phytozome-next.jgi.doe.gov/report/protein/Zmays_RefGen_V4/Zm00001d020185_P009	Zm00001d020185_P009	Z.mays RefGen_V4	1.49e-93	33	658	+/+	seq.submitted 2021-10-26T21:30:50.291Z UTC	269	903	58	663	311.997	215	331	75	925	673
	phytozome-next.jgi.doe.gov/report/protein/Zmays_RefGen_V4/Zm00001d020185_P005	Zm00001d020185_P005	Z.mays RefGen_V4	1.49e-93	33	658	+/+	seq.submitted 2021-10-26T21:30:50.291Z UTC	269	903	58	663	311.997	215	331	75	925	673
	phytozome-next.jgi.doe.gov/report/protein/Zmays_RefGen_V4/Zm00001d020183_P012	Zm00001d020183_P012	Z.mays RefGen_V4	7.57e-92	32	650	+/+	seq.submitted 2021-10-26T21:30:50.291Z UTC	273	903	2	593	305.449	208	321	77	925	603
	phytozome-next.jgi.doe.gov/report/protein/Zmays_RefGen_V4/Zm00001d020183_P009	Zm00001d020183_P009	Z.mays RefGen_V4	8.47e-92	32	654	+/+	seq.submitted 2021-10-26T21:30:50.291Z UTC	273	903	2	603	305.449	209	323	75	925	613
	phytozome-next.jgi.doe.gov/report/protein/Zmays_RefGen_V4/Zm00001d020183_P006	Zm00001d020183_P006	Z.mays RefGen_V4	8.47e-92	32	654	+/+	seq.submitted 2021-10-26T21:30:50.291Z UTC	273	903	2	603	305.449	209	323	75	925	613
	phytozome-next.jgi.doe.gov/report/protein/Zmays_RefGen_V4/Zm00001d020183_P008	Zm00001d020183_P008	Z.mays RefGen_V4	6.47e-87	31	679	+/+	seq.submitted 2021-10-26T21:30:50.291Z UTC	273	903	2	635	293.123	210	325	93	925	645
	phytozome-next.jgi.doe.gov/report/protein/Zmays_RefGen_V4/Zm00001d020183_P004	Zm00001d020183_P004	Z.mays RefGen_V4	6.47e-87	31	679	+/+	seq.submitted 2021-10-26T21:30:50.291Z UTC	273	903	2	635	293.123	210	325	93	925	645
	phytozome-next.jgi.doe.gov/report/protein/Zmays_RefGen_V4/Zm00001d020183_P002	Zm00001d020183_P002	Z.mays RefGen_V4	3.25e-84	31	687	+/+	seq.submitted 2021-10-26T21:30:50.291Z UTC	273	903	2	643	286.189	210	327	101	925	653
	phytozome-next.jgi.doe.gov/report/protein/Zmays_RefGen_V4/Zm00001d034089_P001	Zm00001d034089_P001	Z.mays RefGen_V4	1.07e-79	48	292	+/+	seq.submitted 2021-10-26T21:30:50.291Z UTC	586	875	512	802	278.1	139	197	3	925	842
	phytozome-next.jgi.doe.gov/report/protein/Zmays_RefGen_V4/Zm00001d015291_P002	Zm00001d015291_P002	Z.mays RefGen_V4	1.76e-79	31	636	+/+	seq.submitted 2021-10-26T21:30:50.291Z UTC	271	875	32	614	273.478	196	313	84	925	664
	phytozome-next.jgi.doe.gov/report/protein/Zmays_RefGen_V4/Zm00001d041941_P001	Zm00001d041941_P001	Z.mays RefGen_V4	2.26e-78	31	795	+/+	seq.submitted 2021-10-26T21:30:50.291Z UTC	16	769	17	797	273.478	249	366	55	925	798
	phytozome-next.jgi.doe.gov/report/protein/Zmays_RefGen_V4/Zm00001d045515_P001	Zm00001d045515_P001	Z.mays RefGen_V4	3.37e-77	46	293	+/+	seq.submitted 2021-10-26T21:30:50.291Z UTC	586	876	504	795	271.552	136	193	3	925	852
	phytozome-next.jgi.doe.gov/report/protein/Zmays_RefGen_V4/Zm00001d035992_P001	Zm00001d035992_P001	Z.mays RefGen_V4	1.06e-76	46	293	+/+	seq.submitted 2021-10-26T21:30:50.291Z UTC	586	876	474	765	272.707	136	193	3	925	996
	phytozome-next.jgi.doe.gov/report/protein/Zmays_RefGen_V4/Zm00001d043091_P004	Zm00001d043091_P004	Z.mays RefGen_V4	5.64e-76	40	391	+/+	seq.submitted 2021-10-26T21:30:50.291Z UTC	501	884	497	876	269.24	158	228	18	925	923
	phytozome-next.jgi.doe.gov/report/protein/Zmays_RefGen_V4/Zm00001d043091_P004	Zm00001d043091_P004	Z.mays RefGen_V4	0.00118	35	72	+/+	seq.submitted 2021-10-26T21:30:50.291Z UTC	373	442	3	67	45.0542	25	45	9	925	923
	phytozome-next.jgi.doe.gov/report/protein/Zmays_RefGen_V4/Zm00001d043091_P003	Zm00001d043091_P003	Z.mays RefGen_V4	8.9e-76	40	391	+/+	seq.submitted 2021-10-26T21:30:50.291Z UTC	501	884	529	908	269.24	158	228	18	925	955
	phytozome-next.jgi.doe.gov/report/protein/Zmays_RefGen_V4/Zm00001d043091_P003	Zm00001d043091_P003	Z.mays RefGen_V4	5.74e-05	32	94	+/+	seq.submitted 2021-10-26T21:30:50.291Z UTC	351	442	18	99	49.2914	30	54	14	925	955
	phytozome-next.jgi.doe.gov/report/protein/Zmays_RefGen_V4/Zm00001d037464_P001	Zm00001d037464_P001	Z.mays RefGen_V4	3.58e-75	48	279	+/+	seq.submitted 2021-10-26T21:30:50.291Z UTC	599	872	71	345	253.832	133	186	9	925	402
	phytozome-next.jgi.doe.gov/report/protein/Zmays_RefGen_V4/Zm00001d020183_P005	Zm00001d020183_P005	Z.mays RefGen_V4	3.81e-75	41	321	+/+	seq.submitted 2021-10-26T21:30:50.291Z UTC	584	904	7	315	251.136	131	189	12	925	324
	phytozome-next.jgi.doe.gov/report/protein/Zmays_RefGen_V4/Zm00001d020183_P010	Zm00001d020183_P010	Z.mays RefGen_V4	3.81e-75	41	321	+/+	seq.submitted 2021-10-26T21:30:50.291Z UTC	584	904	7	315	251.136	131	189	12	925	324
	phytozome-next.jgi.doe.gov/report/protein/Zmays_RefGen_V4/Zm00001d037544_P001	Zm00001d037544_P001	Z.mays RefGen_V4	5.02e-75	45	306	+/+	seq.submitted 2021-10-26T21:30:50.291Z UTC	585	888	488	788	265.003	138	198	7	925	837
	phytozome-next.jgi.doe.gov/report/protein/Zmays_RefGen_V4/Zm00001d002175_P001	Zm00001d002175_P001	Z.mays RefGen_V4	7.26e-75	45	298	+/+	seq.submitted 2021-10-26T21:30:50.291Z UTC	586	880	523	818	265.774	134	196	5	925	898
	phytozome-next.jgi.doe.gov/report/protein/Zmays_RefGen_V4/Zm00001d046838_P005	Zm00001d046838_P005	Z.mays RefGen_V4	2.65e-74	39	367	+/+	seq.submitted 2021-10-26T21:30:50.291Z UTC	523	879	417	780	263.077	144	214	13	925	843
	phytozome-next.jgi.doe.gov/report/protein/Zmays_RefGen_V4/Zm00001d046838_P001	Zm00001d046838_P001	Z.mays RefGen_V4	2.65e-74	39	367	+/+	seq.submitted 2021-10-26T21:30:50.291Z UTC	523	879	417	780	263.077	144	214	13	925	843
	phytozome-next.jgi.doe.gov/report/protein/Zmays_RefGen_V4/Zm00001d046838_P004	Zm00001d046838_P004	Z.mays RefGen_V4	2.65e-74	39	367	+/+	seq.submitted 2021-10-26T21:30:50.291Z UTC	523	879	417	780	263.077	144	214	13	925	843
	phytozome-next.jgi.doe.gov/report/protein/Zmays_RefGen_V4/Zm00001d046838_P002	Zm00001d046838_P002	Z.mays RefGen_V4	2.65e-74	39	367	+/+	seq.submitted 2021-10-26T21:30:50.291Z UTC	523	879	417	780	263.077	144	214	13	925	843
	phytozome-next.jgi.doe.gov/report/protein/Zmays_RefGen_V4/Zm00001d038522_P001	Zm00001d038522_P001	Z.mays RefGen_V4	2.79e-74	41	363	+/+	seq.submitted 2021-10-26T21:30:50.291Z UTC	547	893	7	358	251.136	148	204	27	925	389
	phytozome-next.jgi.doe.gov/report/protein/Zmays_RefGen_V4/Zm00001d043091_P002	Zm00001d043091_P002	Z.mays RefGen_V4	4.05e-74	40	391	+/+	seq.submitted 2021-10-26T21:30:50.291Z UTC	501	884	427	806	268.855	158	228	18	925	1510
	phytozome-next.jgi.doe.gov/report/protein/Zmays_RefGen_V4/Zm00001d043091_P002	Zm00001d043091_P002	Z.mays RefGen_V4	4.86e-19	44	109	+/+	seq.submitted 2021-10-26T21:30:50.291Z UTC	764	872	1345	1453	95.1301	48	67	0	925	1510
	phytozome-next.jgi.doe.gov/report/protein/Zmays_RefGen_V4/Zm00001d043091_P002	Zm00001d043091_P002	Z.mays RefGen_V4	1.6e-08	32	130	+/+	seq.submitted 2021-10-26T21:30:50.291Z UTC	526	652	1220	1344	60.8474	41	64	8	925	1510
	phytozome-next.jgi.doe.gov/report/protein/Zmays_RefGen_V4/Zm00001d038522_P002	Zm00001d038522_P002	Z.mays RefGen_V4	4.47e-73	39	397	+/+	seq.submitted 2021-10-26T21:30:50.291Z UTC	513	893	560	944	261.922	155	219	28	925	975
	phytozome-next.jgi.doe.gov/report/protein/Zmays_RefGen_V4/Zm00001d027436_P001	Zm00001d027436_P001	Z.mays RefGen_V4	4.84e-73	46	297	+/+	seq.submitted 2021-10-26T21:30:50.291Z UTC	588	875	439	735	258.84	137	186	9	925	802
	phytozome-next.jgi.doe.gov/report/protein/Zmays_RefGen_V4/Zm00001d038503_P015	Zm00001d038503_P015	Z.mays RefGen_V4	5.34e-73	38	404	+/+	seq.submitted 2021-10-26T21:30:50.291Z UTC	515	902	23	400	248.44	153	223	42	925	419
	phytozome-next.jgi.doe.gov/report/protein/Zmays_RefGen_V4/Zm00001d038503_P004	Zm00001d038503_P004	Z.mays RefGen_V4	6.52e-73	38	404	+/+	seq.submitted 2021-10-26T21:30:50.291Z UTC	515	902	32	409	248.44	153	223	42	925	428
	phytozome-next.jgi.doe.gov/report/protein/Zmays_RefGen_V4/Zm00001d003925_P001	Zm00001d003925_P001	Z.mays RefGen_V4	8.57e-73	45	291	+/+	seq.submitted 2021-10-26T21:30:50.291Z UTC	581	868	93	383	249.98	130	185	3	925	487
	phytozome-next.jgi.doe.gov/report/protein/Zmays_RefGen_V4/Zm00001d010971_P002	Zm00001d010971_P002	Z.mays RefGen_V4	9.2e-73	45	290	+/+	seq.submitted 2021-10-26T21:30:50.291Z UTC	582	868	76	365	248.44	131	183	3	925	439
	phytozome-next.jgi.doe.gov/report/protein/Zmays_RefGen_V4/Zm00001d010492_P003	Zm00001d010492_P003	Z.mays RefGen_V4	1.22e-72	41	342	+/+	seq.submitted 2021-10-26T21:30:50.291Z UTC	569	892	31	372	248.825	139	198	18	925	463
	phytozome-next.jgi.doe.gov/report/protein/Zmays_RefGen_V4/Zm00001d043091_P001	Zm00001d043091_P001	Z.mays RefGen_V4	1.27e-72	41	350	+/+	seq.submitted 2021-10-26T21:30:50.291Z UTC	526	872	211	552	253.062	144	203	11	925	609
	phytozome-next.jgi.doe.gov/report/protein/Zmays_RefGen_V4/Zm00001d035476_P001	Zm00001d035476_P001	Z.mays RefGen_V4	1.28e-72	46	290	+/+	seq.submitted 2021-10-26T21:30:50.291Z UTC	582	868	76	365	248.44	132	182	3	925	446
	phytozome-next.jgi.doe.gov/report/protein/Zmays_RefGen_V4/Zm00001d037297_P004	Zm00001d037297_P004	Z.mays RefGen_V4	1.58e-72	39	476	+/+	seq.submitted 2021-10-26T21:30:50.291Z UTC	412	869	89	534	252.292	185	261	48	925	590
	phytozome-next.jgi.doe.gov/report/protein/Zmays_RefGen_V4/Zm00001d047533_P001	Zm00001d047533_P001	Z.mays RefGen_V4	1.82e-72	45	298	+/+	seq.submitted 2021-10-26T21:30:50.291Z UTC	586	880	523	818	258.84	135	191	5	925	889
	phytozome-next.jgi.doe.gov/report/protein/Zmays_RefGen_V4/Zm00001d010492_P010	Zm00001d010492_P010	Z.mays RefGen_V4	1.93e-72	41	342	+/+	seq.submitted 2021-10-26T21:30:50.291Z UTC	569	892	43	384	248.825	139	198	18	925	475
	phytozome-next.jgi.doe.gov/report/protein/Zmays_RefGen_V4/Zm00001d010492_P009	Zm00001d010492_P009	Z.mays RefGen_V4	1.93e-72	41	342	+/+	seq.submitted 2021-10-26T21:30:50.291Z UTC	569	892	43	384	248.825	139	198	18	925	475
	phytozome-next.jgi.doe.gov/report/protein/Zmays_RefGen_V4/Zm00001d037297_P003	Zm00001d037297_P003	Z.mays RefGen_V4	3.27e-72	39	476	+/+	seq.submitted 2021-10-26T21:30:50.291Z UTC	412	869	136	581	252.292	185	261	48	925	615
	phytozome-next.jgi.doe.gov/report/protein/Zmays_RefGen_V4/Zm00001d037297_P006	Zm00001d037297_P006	Z.mays RefGen_V4	4.3e-72	39	476	+/+	seq.submitted 2021-10-26T21:30:50.291Z UTC	412	869	136	581	252.292	185	261	48	925	637
	phytozome-next.jgi.doe.gov/report/protein/Zmays_RefGen_V4/Zm00001d037297_P001	Zm00001d037297_P001	Z.mays RefGen_V4	4.3e-72	39	476	+/+	seq.submitted 2021-10-26T21:30:50.291Z UTC	412	869	136	581	252.292	185	261	48	925	637
	phytozome-next.jgi.doe.gov/report/protein/Zmays_RefGen_V4/Zm00001d020183_P003	Zm00001d020183_P003	Z.mays RefGen_V4	4.58e-72	41	320	+/+	seq.submitted 2021-10-26T21:30:50.291Z UTC	584	903	266	573	251.136	131	189	12	925	583
	phytozome-next.jgi.doe.gov/report/protein/Zmays_RefGen_V4/Zm00001d020183_P003	Zm00001d020183_P003	Z.mays RefGen_V4	4.59e-09	26	255	+/+	seq.submitted 2021-10-26T21:30:50.291Z UTC	273	494	2	229	62.3882	66	105	60	925	583
	phytozome-next.jgi.doe.gov/report/protein/Zmays_RefGen_V4/Zm00001d020183_P007	Zm00001d020183_P007	Z.mays RefGen_V4	4.58e-72	41	320	+/+	seq.submitted 2021-10-26T21:30:50.291Z UTC	584	903	266	573	251.136	131	189	12	925	583
	phytozome-next.jgi.doe.gov/report/protein/Zmays_RefGen_V4/Zm00001d020183_P007	Zm00001d020183_P007	Z.mays RefGen_V4	4.59e-09	26	255	+/+	seq.submitted 2021-10-26T21:30:50.291Z UTC	273	494	2	229	62.3882	66	105	60	925	583
	phytozome-next.jgi.doe.gov/report/protein/Zmays_RefGen_V4/Zm00001d028686_P001	Zm00001d028686_P001	Z.mays RefGen_V4	6.84e-72	47	290	+/+	seq.submitted 2021-10-26T21:30:50.291Z UTC	588	875	501	788	256.529	135	187	4	925	852
	phytozome-next.jgi.doe.gov/report/protein/Zmays_RefGen_V4/Zm00001d018789_P001	Zm00001d018789_P001	Z.mays RefGen_V4	8.05e-72	40	382	+/+	seq.submitted 2021-10-26T21:30:50.291Z UTC	512	872	484	855	257.684	151	218	31	925	918
	phytozome-next.jgi.doe.gov/report/protein/Zmays_RefGen_V4/Zm00001d018789_P001	Zm00001d018789_P001	Z.mays RefGen_V4	0.00416	29	184	+/+	seq.submitted 2021-10-26T21:30:50.291Z UTC	165	313	234	409	43.1282	54	83	43	925	918
	phytozome-next.jgi.doe.gov/report/protein/Zmays_RefGen_V4/Zm00001d029047_P001	Zm00001d029047_P001	Z.mays RefGen_V4	8.87e-72	45	298	+/+	seq.submitted 2021-10-26T21:30:50.291Z UTC	586	880	522	817	256.914	134	189	5	925	887
	phytozome-next.jgi.doe.gov/report/protein/Zmays_RefGen_V4/Zm00001d050575_P002	Zm00001d050575_P002	Z.mays RefGen_V4	9.43e-72	45	293	+/+	seq.submitted 2021-10-26T21:30:50.291Z UTC	580	868	97	389	248.44	131	186	4	925	519
	phytozome-next.jgi.doe.gov/report/protein/Zmays_RefGen_V4/Zm00001d050575_P001	Zm00001d050575_P001	Z.mays RefGen_V4	9.43e-72	45	293	+/+	seq.submitted 2021-10-26T21:30:50.291Z UTC	580	868	97	389	248.44	131	186	4	925	519
	phytozome-next.jgi.doe.gov/report/protein/Zmays_RefGen_V4/Zm00001d040270_P016	Zm00001d040270_P016	Z.mays RefGen_V4	1.24e-71	39	354	+/+	seq.submitted 2021-10-26T21:30:50.291Z UTC	521	869	33	378	245.743	138	208	13	925	446
	phytozome-next.jgi.doe.gov/report/protein/Zmays_RefGen_V4/Zm00001d040270_P014	Zm00001d040270_P014	Z.mays RefGen_V4	1.24e-71	39	354	+/+	seq.submitted 2021-10-26T21:30:50.291Z UTC	521	869	33	378	245.743	138	208	13	925	446
	phytozome-next.jgi.doe.gov/report/protein/Zmays_RefGen_V4/Zm00001d040270_P017	Zm00001d040270_P017	Z.mays RefGen_V4	1.24e-71	39	354	+/+	seq.submitted 2021-10-26T21:30:50.291Z UTC	521	869	33	378	245.743	138	208	13	925	446
	phytozome-next.jgi.doe.gov/report/protein/Zmays_RefGen_V4/Zm00001d043091_P005	Zm00001d043091_P005	Z.mays RefGen_V4	1.59e-71	38	415	+/+	seq.submitted 2021-10-26T21:30:50.291Z UTC	477	884	488	878	256.914	159	232	31	925	925
	phytozome-next.jgi.doe.gov/report/protein/Zmays_RefGen_V4/Zm00001d043091_P005	Zm00001d043091_P005	Z.mays RefGen_V4	6.25e-05	32	94	+/+	seq.submitted 2021-10-26T21:30:50.291Z UTC	351	442	18	99	48.9062	30	54	14	925	925
	phytozome-next.jgi.doe.gov/report/protein/Zmays_RefGen_V4/Zm00001d040127_P003	Zm00001d040127_P003	Z.mays RefGen_V4	1.94e-71	40	369	+/+	seq.submitted 2021-10-26T21:30:50.291Z UTC	524	869	42	403	245.743	146	216	30	925	468
	phytozome-next.jgi.doe.gov/report/protein/Zmays_RefGen_V4/Zm00001d011066_P003	Zm00001d011066_P003	Z.mays RefGen_V4	1.99e-71	41	343	+/+	seq.submitted 2021-10-26T21:30:50.291Z UTC	567	890	50	391	243.817	139	207	20	925	407
	phytozome-next.jgi.doe.gov/report/protein/Zmays_RefGen_V4/Zm00001d016591_P002	Zm00001d016591_P002	Z.mays RefGen_V4	2.05e-71	45	293	+/+	seq.submitted 2021-10-26T21:30:50.291Z UTC	580	868	90	382	246.899	131	185	4	925	510
	phytozome-next.jgi.doe.gov/report/protein/Zmays_RefGen_V4/Zm00001d041938_P001	Zm00001d041938_P001	Z.mays RefGen_V4	2.3e-71	45	300	+/+	seq.submitted 2021-10-26T21:30:50.291Z UTC	583	868	164	460	246.128	134	183	17	925	478
	phytozome-next.jgi.doe.gov/report/protein/Zmays_RefGen_V4/Zm00001d022492_P002	Zm00001d022492_P002	Z.mays RefGen_V4	2.39e-71	45	286	+/+	seq.submitted 2021-10-26T21:30:50.291Z UTC	586	868	64	348	245.358	130	182	4	925	464
	phytozome-next.jgi.doe.gov/report/protein/Zmays_RefGen_V4/Zm00001d022492_P001	Zm00001d022492_P001	Z.mays RefGen_V4	2.39e-71	45	286	+/+	seq.submitted 2021-10-26T21:30:50.291Z UTC	586	868	64	348	245.358	130	182	4	925	464
	phytozome-next.jgi.doe.gov/report/protein/Zmays_RefGen_V4/Zm00001d010421_P003	Zm00001d010421_P003	Z.mays RefGen_V4	2.62e-71	42	313	+/+	seq.submitted 2021-10-26T21:30:50.291Z UTC	570	876	41	350	244.588	132	198	9	925	444
	phytozome-next.jgi.doe.gov/report/protein/Zmays_RefGen_V4/Zm00001d038494_P012	Zm00001d038494_P012	Z.mays RefGen_V4	3.1e-71	38	404	+/+	seq.submitted 2021-10-26T21:30:50.291Z UTC	515	902	189	566	248.825	153	223	42	925	585
	phytozome-next.jgi.doe.gov/report/protein/Zmays_RefGen_V4/Zm00001d038494_P004	Zm00001d038494_P004	Z.mays RefGen_V4	3.1e-71	38	404	+/+	seq.submitted 2021-10-26T21:30:50.291Z UTC	515	902	189	566	248.825	153	223	42	925	585
	phytozome-next.jgi.doe.gov/report/protein/Zmays_RefGen_V4/Zm00001d038494_P003	Zm00001d038494_P003	Z.mays RefGen_V4	3.1e-71	38	404	+/+	seq.submitted 2021-10-26T21:30:50.291Z UTC	515	902	189	566	248.825	153	223	42	925	585
	phytozome-next.jgi.doe.gov/report/protein/Zmays_RefGen_V4/Zm00001d045728_P001	Zm00001d045728_P001	Z.mays RefGen_V4	3.13e-71	38	496	+/+	seq.submitted 2021-10-26T21:30:50.291Z UTC	409	888	66	538	248.44	187	272	39	925	570
	phytozome-next.jgi.doe.gov/report/protein/Zmays_RefGen_V4/Zm00001d040127_P002	Zm00001d040127_P002	Z.mays RefGen_V4	3.64e-71	44	290	+/+	seq.submitted 2021-10-26T21:30:50.291Z UTC	586	869	12	297	241.506	128	187	10	925	362
	phytozome-next.jgi.doe.gov/report/protein/Zmays_RefGen_V4/Zm00001d038503_P012	Zm00001d038503_P012	Z.mays RefGen_V4	4.41e-71	38	404	+/+	seq.submitted 2021-10-26T21:30:50.291Z UTC	515	902	189	566	248.44	153	223	42	925	585
	phytozome-next.jgi.doe.gov/report/protein/Zmays_RefGen_V4/Zm00001d038503_P009	Zm00001d038503_P009	Z.mays RefGen_V4	4.41e-71	38	404	+/+	seq.submitted 2021-10-26T21:30:50.291Z UTC	515	902	189	566	248.44	153	223	42	925	585
	phytozome-next.jgi.doe.gov/report/protein/Zmays_RefGen_V4/Zm00001d008433_P001	Zm00001d008433_P001	Z.mays RefGen_V4	5.32e-71	44	318	+/+	seq.submitted 2021-10-26T21:30:50.291Z UTC	560	869	318	632	250.751	139	199	11	925	698
	phytozome-next.jgi.doe.gov/report/protein/Zmays_RefGen_V4/Zm00001d008433_P002	Zm00001d008433_P002	Z.mays RefGen_V4	5.32e-71	44	318	+/+	seq.submitted 2021-10-26T21:30:50.291Z UTC	560	869	318	632	250.751	139	199	11	925	698
	phytozome-next.jgi.doe.gov/report/protein/Zmays_RefGen_V4/Zm00001d002282_P001	Zm00001d002282_P001	Z.mays RefGen_V4	6.24e-71	43	291	+/+	seq.submitted 2021-10-26T21:30:50.291Z UTC	584	872	502	790	253.832	126	184	4	925	854
	phytozome-next.jgi.doe.gov/report/protein/Zmays_RefGen_V4/Zm00001d045728_P007	Zm00001d045728_P007	Z.mays RefGen_V4	6.28e-71	38	496	+/+	seq.submitted 2021-10-26T21:30:50.291Z UTC	409	888	86	558	248.054	187	272	39	925	590
	phytozome-next.jgi.doe.gov/report/protein/Zmays_RefGen_V4/Zm00001d004559_P017	Zm00001d004559_P017	Z.mays RefGen_V4	6.72e-71	45	299	+/+	seq.submitted 2021-10-26T21:30:50.291Z UTC	578	869	223	513	247.669	136	191	15	925	577
	phytozome-next.jgi.doe.gov/report/protein/Zmays_RefGen_V4/Zm00001d004559_P002	Zm00001d004559_P002	Z.mays RefGen_V4	6.72e-71	45	299	+/+	seq.submitted 2021-10-26T21:30:50.291Z UTC	578	869	223	513	247.669	136	191	15	925	577
	phytozome-next.jgi.doe.gov/report/protein/Zmays_RefGen_V4/Zm00001d008433_P006	Zm00001d008433_P006	Z.mays RefGen_V4	7.62e-71	45	290	+/+	seq.submitted 2021-10-26T21:30:50.291Z UTC	586	869	343	629	250.366	130	188	9	925	695
	phytozome-next.jgi.doe.gov/report/protein/Zmays_RefGen_V4/Zm00001d008433_P005	Zm00001d008433_P005	Z.mays RefGen_V4	7.62e-71	45	290	+/+	seq.submitted 2021-10-26T21:30:50.291Z UTC	586	869	343	629	250.366	130	188	9	925	695
	phytozome-next.jgi.doe.gov/report/protein/Zmays_RefGen_V4/Zm00001d011779_P015	Zm00001d011779_P015	Z.mays RefGen_V4	1.13e-70	39	347	+/+	seq.submitted 2021-10-26T21:30:50.291Z UTC	570	903	22	365	240.736	136	205	16	925	379
	phytozome-next.jgi.doe.gov/report/protein/Zmays_RefGen_V4/Zm00001d011779_P007	Zm00001d011779_P007	Z.mays RefGen_V4	1.13e-70	39	347	+/+	seq.submitted 2021-10-26T21:30:50.291Z UTC	570	903	22	365	240.736	136	205	16	925	379
	phytozome-next.jgi.doe.gov/report/protein/Zmays_RefGen_V4/Zm00001d043075_P017	Zm00001d043075_P017	Z.mays RefGen_V4	1.38e-70	41	356	+/+	seq.submitted 2021-10-26T21:30:50.291Z UTC	524	869	52	391	243.047	145	206	26	925	453
	phytozome-next.jgi.doe.gov/report/protein/Zmays_RefGen_V4/Zm00001d043075_P028	Zm00001d043075_P028	Z.mays RefGen_V4	2.22e-70	45	301	+/+	seq.submitted 2021-10-26T21:30:50.291Z UTC	576	869	17	309	239.965	134	185	15	925	371
	phytozome-next.jgi.doe.gov/report/protein/Zmays_RefGen_V4/Zm00001d037297_P009	Zm00001d037297_P009	Z.mays RefGen_V4	2.56e-70	40	366	+/+	seq.submitted 2021-10-26T21:30:50.291Z UTC	513	869	16	355	241.121	147	207	35	925	411
	phytozome-next.jgi.doe.gov/report/protein/Zmays_RefGen_V4/Zm00001d037297_P005	Zm00001d037297_P005	Z.mays RefGen_V4	2.56e-70	40	366	+/+	seq.submitted 2021-10-26T21:30:50.291Z UTC	513	869	16	355	241.121	147	207	35	925	411
	phytozome-next.jgi.doe.gov/report/protein/Zmays_RefGen_V4/Zm00001d045728_P004	Zm00001d045728_P004	Z.mays RefGen_V4	2.57e-70	38	496	+/+	seq.submitted 2021-10-26T21:30:50.291Z UTC	409	888	129	601	247.284	187	272	39	925	633
	phytozome-next.jgi.doe.gov/report/protein/Zmays_RefGen_V4/Zm00001d012958_P002	Zm00001d012958_P002	Z.mays RefGen_V4	2.96e-70	43	311	+/+	seq.submitted 2021-10-26T21:30:50.291Z UTC	577	871	35	344	240.35	134	193	17	925	401
	phytozome-next.jgi.doe.gov/report/protein/Zmays_RefGen_V4/Zm00001d040691_P003	Zm00001d040691_P003	Z.mays RefGen_V4	3.36e-70	45	286	+/+	seq.submitted 2021-10-26T21:30:50.291Z UTC	586	869	179	463	243.047	130	183	3	925	481
	phytozome-next.jgi.doe.gov/report/protein/Zmays_RefGen_V4/Zm00001d029012_P003	Zm00001d029012_P003	Z.mays RefGen_V4	4.43e-70	45	299	+/+	seq.submitted 2021-10-26T21:30:50.291Z UTC	586	876	308	599	247.284	135	187	15	925	658
	phytozome-next.jgi.doe.gov/report/protein/Zmays_RefGen_V4/Zm00001d040691_P002	Zm00001d040691_P002	Z.mays RefGen_V4	4.71e-70	45	286	+/+	seq.submitted 2021-10-26T21:30:50.291Z UTC	586	869	179	463	243.432	130	183	3	925	515
	phytozome-next.jgi.doe.gov/report/protein/Zmays_RefGen_V4/Zm00001d011908_P005	Zm00001d011908_P005	Z.mays RefGen_V4	6.48e-70	43	306	+/+	seq.submitted 2021-10-26T21:30:50.291Z UTC	572	868	50	355	242.276	131	187	9	925	493
	phytozome-next.jgi.doe.gov/report/protein/Zmays_RefGen_V4/Zm00001d012958_P001	Zm00001d012958_P001	Z.mays RefGen_V4	6.67e-70	43	311	+/+	seq.submitted 2021-10-26T21:30:50.291Z UTC	577	871	53	362	239.965	134	193	17	925	419
	phytozome-next.jgi.doe.gov/report/protein/Zmays_RefGen_V4/Zm00001d042185_P013	Zm00001d042185_P013	Z.mays RefGen_V4	7.35e-70	42	306	+/+	seq.submitted 2021-10-26T21:30:50.291Z UTC	572	868	50	355	242.276	130	188	9	925	492
	phytozome-next.jgi.doe.gov/report/protein/Zmays_RefGen_V4/Zm00001d042185_P004	Zm00001d042185_P004	Z.mays RefGen_V4	7.35e-70	42	306	+/+	seq.submitted 2021-10-26T21:30:50.291Z UTC	572	868	50	355	242.276	130	188	9	925	492
	phytozome-next.jgi.doe.gov/report/protein/Zmays_RefGen_V4/Zm00001d040691_P005	Zm00001d040691_P005	Z.mays RefGen_V4	8.79e-70	45	286	+/+	seq.submitted 2021-10-26T21:30:50.291Z UTC	586	869	191	475	243.047	130	183	3	925	527
	phytozome-next.jgi.doe.gov/report/protein/Zmays_RefGen_V4/Zm00001d045728_P006	Zm00001d045728_P006	Z.mays RefGen_V4	8.85e-70	39	387	+/+	seq.submitted 2021-10-26T21:30:50.291Z UTC	511	888	17	380	239.58	150	218	32	925	412
	phytozome-next.jgi.doe.gov/report/protein/Zmays_RefGen_V4/Zm00001d005199_P001	Zm00001d005199_P001	Z.mays RefGen_V4	9.76e-70	42	326	+/+	seq.submitted 2021-10-26T21:30:50.291Z UTC	586	903	176	500	242.276	136	198	9	925	509
	phytozome-next.jgi.doe.gov/report/protein/Zmays_RefGen_V4/Zm00001d018472_P004	Zm00001d018472_P004	Z.mays RefGen_V4	1.08e-69	41	304	+/+	seq.submitted 2021-10-26T21:30:50.291Z UTC	580	880	39	338	240.35	125	191	7	925	447
	Paralogs	Protein/splice variant	Species	E-value	% identity	Align len	Strands	Query ID	Query from	Query to	Target from	Target to	Bitscore
	1	Zm00001d021829_P001	Z.mays RefGen_V4	0	55	557	+/+	seq.submitted 2021-10-26T21:30:50.291Z UTC	363	901	29	555	591.652
		Zm00001d021829_P002	Z.mays RefGen_V4	0	56	543	+/+	seq.submitted 2021-10-26T21:30:50.291Z UTC	363	901	29	532	583.563
	2	Zm00001d052306_P002	Z.mays RefGen_V4	1.08e-108	32	877	+/+	seq.submitted 2021-10-26T21:30:50.291Z UTC	83	898	77	910	358.992
		Zm00001d052306_P003	Z.mays RefGen_V4	5.77e-110	33	866	+/+	seq.submitted 2021-10-26T21:30:50.291Z UTC	83	898	77	909	362.459
		Zm00001d052306_P004	Z.mays RefGen_V4	1.08e-108	32	877	+/+	seq.submitted 2021-10-26T21:30:50.291Z UTC	83	898	77	910	358.992
		Zm00001d052306_P005	Z.mays RefGen_V4	5.77e-110	33	866	+/+	seq.submitted 2021-10-26T21:30:50.291Z UTC	83	898	77	909	362.459

## Sheet: Oryza
	Views	Protein	Species	E-value	% identity	Align len	Strands	Query ID	Query from	Query to	Target from	Target to	Bitscore	# identical	Positives	Gaps	Query len	Target len
	phytozome-next.jgi.doe.gov/report/protein/Osativa_v7_0/LOC_Os07g38070.1	LOC_Os07g38070.1	O.sativa v7.0	0	57	546	+/+	seq.submitted 2021-10-26T21:32:21.193Z UTC	362	901	34	549	594.349	309	382	36	925	577
	phytozome-next.jgi.doe.gov/report/protein/Osativa_v7_0/LOC_Os12g01200.1	LOC_Os12g01200.1	O.sativa v7.0	3.76e-111	33	904	+/+	seq.submitted 2021-10-26T21:32:21.193Z UTC	14	875	6	874	364.385	295	432	77	925	922
	phytozome-next.jgi.doe.gov/report/protein/Osativa_v7_0/LOC_Os12g01200.2	LOC_Os12g01200.2	O.sativa v7.0	3.76e-111	33	904	+/+	seq.submitted 2021-10-26T21:32:21.193Z UTC	14	875	6	874	364.385	295	432	77	925	922
	phytozome-next.jgi.doe.gov/report/protein/Osativa_v7_0/LOC_Os12g01200.3	LOC_Os12g01200.3	O.sativa v7.0	3.76e-111	33	904	+/+	seq.submitted 2021-10-26T21:32:21.193Z UTC	14	875	6	874	364.385	295	432	77	925	922
	phytozome-next.jgi.doe.gov/report/protein/Osativa_v7_0/LOC_Os09g18020.1	LOC_Os09g18020.1	O.sativa v7.0	5.94e-111	32	865	+/+	seq.submitted 2021-10-26T21:32:21.193Z UTC	78	893	74	863	362.459	278	411	124	925	864
	phytozome-next.jgi.doe.gov/report/protein/Osativa_v7_0/LOC_Os11g01200.1	LOC_Os11g01200.1	O.sativa v7.0	7.45e-111	32	892	+/+	seq.submitted 2021-10-26T21:32:21.193Z UTC	26	875	19	877	363.614	289	425	75	925	925
	phytozome-next.jgi.doe.gov/report/protein/Osativa_v7_0/LOC_Os11g01200.2	LOC_Os11g01200.2	O.sativa v7.0	7.45e-111	32	892	+/+	seq.submitted 2021-10-26T21:32:21.193Z UTC	26	875	19	877	363.614	289	425	75	925	925
	phytozome-next.jgi.doe.gov/report/protein/Osativa_v7_0/LOC_Os09g19229.1	LOC_Os09g19229.1	O.sativa v7.0	7.48e-110	33	830	+/+	seq.submitted 2021-10-26T21:32:21.193Z UTC	77	880	71	832	359.377	275	417	94	925	855
	phytozome-next.jgi.doe.gov/report/protein/Osativa_v7_0/LOC_Os09g18594.1	LOC_Os09g18594.1	O.sativa v7.0	2.66e-98	32	856	+/+	seq.submitted 2021-10-26T21:32:21.193Z UTC	78	892	79	874	328.946	274	404	101	925	887
	phytozome-next.jgi.doe.gov/report/protein/Osativa_v7_0/LOC_Os05g44930.1	LOC_Os05g44930.1	O.sativa v7.0	1.18e-96	31	867	+/+	seq.submitted 2021-10-26T21:32:21.193Z UTC	61	876	68	889	325.865	271	419	96	925	948
	phytozome-next.jgi.doe.gov/report/protein/Osativa_v7_0/LOC_Os05g44970.1	LOC_Os05g44970.1	O.sativa v7.0	3.91e-96	31	839	+/+	seq.submitted 2021-10-26T21:32:21.193Z UTC	82	875	84	880	324.324	257	405	87	925	943
	phytozome-next.jgi.doe.gov/report/protein/Osativa_v7_0/LOC_Os05g44990.1	LOC_Os05g44990.1	O.sativa v7.0	1.32e-95	31	862	+/+	seq.submitted 2021-10-26T21:32:21.193Z UTC	76	875	79	880	322.013	264	410	122	925	913
	phytozome-next.jgi.doe.gov/report/protein/Osativa_v7_0/LOC_Os12g37980.1	LOC_Os12g37980.1	O.sativa v7.0	4.26e-95	30	849	+/+	seq.submitted 2021-10-26T21:32:21.193Z UTC	94	875	110	908	322.013	258	393	117	925	971
	phytozome-next.jgi.doe.gov/report/protein/Osativa_v7_0/LOC_Os12g01200.4	LOC_Os12g01200.4	O.sativa v7.0	3.7e-94	33	851	+/+	seq.submitted 2021-10-26T21:32:21.193Z UTC	14	816	6	821	316.235	280	394	83	925	825
	phytozome-next.jgi.doe.gov/report/protein/Osativa_v7_0/LOC_Os01g03370.1	LOC_Os01g03370.1	O.sativa v7.0	4.98e-93	29	942	+/+	seq.submitted 2021-10-26T21:32:21.193Z UTC	22	876	19	903	316.235	276	443	144	925	965
	phytozome-next.jgi.doe.gov/report/protein/Osativa_v7_0/LOC_Os01g74550.1	LOC_Os01g74550.1	O.sativa v7.0	1.11e-91	31	862	+/+	seq.submitted 2021-10-26T21:32:21.193Z UTC	78	880	89	904	312.383	265	402	105	925	956
	phytozome-next.jgi.doe.gov/report/protein/Osativa_v7_0/LOC_Os09g19350.1	LOC_Os09g19350.1	O.sativa v7.0	4.45e-91	33	628	+/+	seq.submitted 2021-10-26T21:32:21.193Z UTC	269	880	53	615	302.753	208	323	81	925	640
	phytozome-next.jgi.doe.gov/report/protein/Osativa_v7_0/LOC_Os01g59570.1	LOC_Os01g59570.1	O.sativa v7.0	3.73e-88	31	840	+/+	seq.submitted 2021-10-26T21:32:21.193Z UTC	76	876	90	880	302.368	263	410	88	925	938
	phytozome-next.jgi.doe.gov/report/protein/Osativa_v7_0/LOC_Os05g44960.1	LOC_Os05g44960.1	O.sativa v7.0	4.01e-85	32	691	+/+	seq.submitted 2021-10-26T21:32:21.193Z UTC	203	865	3	629	288.5	220	340	92	925	702
	phytozome-next.jgi.doe.gov/report/protein/Osativa_v7_0/LOC_Os03g55210.1	LOC_Os03g55210.1	O.sativa v7.0	5.45e-81	46	315	+/+	seq.submitted 2021-10-26T21:32:21.193Z UTC	586	890	562	875	281.567	145	209	11	925	893
	phytozome-next.jgi.doe.gov/report/protein/Osativa_v7_0/LOC_Os09g19510.1	LOC_Os09g19510.1	O.sativa v7.0	8.75e-78	44	290	+/+	seq.submitted 2021-10-26T21:32:21.193Z UTC	584	873	152	437	261.536	129	186	4	925	458
	phytozome-next.jgi.doe.gov/report/protein/Osativa_v7_0/LOC_Os09g19510.1	LOC_Os09g19510.1	O.sativa v7.0	0.00075	39	57	+/+	seq.submitted 2021-10-26T21:32:21.193Z UTC	383	436	12	68	43.5134	22	35	3	925	458
	phytozome-next.jgi.doe.gov/report/protein/Osativa_v7_0/LOC_Os07g05370.1	LOC_Os07g05370.1	O.sativa v7.0	2.07e-77	40	375	+/+	seq.submitted 2021-10-26T21:32:21.193Z UTC	515	872	420	791	270.781	151	221	20	925	850
	phytozome-next.jgi.doe.gov/report/protein/Osativa_v7_0/LOC_Os07g05370.1	LOC_Os07g05370.1	O.sativa v7.0	3.81e-06	33	158	+/+	seq.submitted 2021-10-26T21:32:21.193Z UTC	211	349	241	397	51.2174	52	70	20	925	850
	phytozome-next.jgi.doe.gov/report/protein/Osativa_v7_0/LOC_Os01g60060.1	LOC_Os01g60060.1	O.sativa v7.0	2.64e-77	40	394	+/+	seq.submitted 2021-10-26T21:32:21.193Z UTC	501	884	499	878	271.937	156	233	24	925	927
	phytozome-next.jgi.doe.gov/report/protein/Osativa_v7_0/LOC_Os01g60060.1	LOC_Os01g60060.1	O.sativa v7.0	0.00141	30	118	+/+	seq.submitted 2021-10-26T21:32:21.193Z UTC	374	488	1	89	43.1282	35	58	32	925	927
	phytozome-next.jgi.doe.gov/report/protein/Osativa_v7_0/LOC_Os05g25350.1	LOC_Os05g25350.1	O.sativa v7.0	5.7e-77	39	395	+/+	seq.submitted 2021-10-26T21:32:21.193Z UTC	486	878	414	789	269.24	155	222	21	925	842
	phytozome-next.jgi.doe.gov/report/protein/Osativa_v7_0/LOC_Os10g39010.3	LOC_Os10g39010.3	O.sativa v7.0	1.5e-76	45	309	+/+	seq.submitted 2021-10-26T21:32:21.193Z UTC	601	904	498	806	268.085	140	191	5	925	845
	phytozome-next.jgi.doe.gov/report/protein/Osativa_v7_0/LOC_Os10g39010.2	LOC_Os10g39010.2	O.sativa v7.0	1.5e-76	45	309	+/+	seq.submitted 2021-10-26T21:32:21.193Z UTC	601	904	498	806	268.085	140	191	5	925	845
	phytozome-next.jgi.doe.gov/report/protein/Osativa_v7_0/LOC_Os10g39010.4	LOC_Os10g39010.4	O.sativa v7.0	1.5e-76	45	309	+/+	seq.submitted 2021-10-26T21:32:21.193Z UTC	601	904	498	806	268.085	140	191	5	925	845
	phytozome-next.jgi.doe.gov/report/protein/Osativa_v7_0/LOC_Os10g39010.1	LOC_Os10g39010.1	O.sativa v7.0	1.5e-76	45	309	+/+	seq.submitted 2021-10-26T21:32:21.193Z UTC	601	904	498	806	268.085	140	191	5	925	845
	phytozome-next.jgi.doe.gov/report/protein/Osativa_v7_0/LOC_Os05g06990.1	LOC_Os05g06990.1	O.sativa v7.0	5.26e-76	45	306	+/+	seq.submitted 2021-10-26T21:32:21.193Z UTC	585	888	494	794	266.544	139	198	7	925	843
	phytozome-next.jgi.doe.gov/report/protein/Osativa_v7_0/LOC_Os06g03610.1	LOC_Os06g03610.1	O.sativa v7.0	1.24e-75	45	293	+/+	seq.submitted 2021-10-26T21:32:21.193Z UTC	586	876	503	793	265.388	133	192	4	925	846
	phytozome-next.jgi.doe.gov/report/protein/Osativa_v7_0/LOC_Os06g22810.1	LOC_Os06g22810.1	O.sativa v7.0	2.58e-75	44	305	+/+	seq.submitted 2021-10-26T21:32:21.193Z UTC	586	888	503	805	265.003	134	194	4	925	860
	phytozome-next.jgi.doe.gov/report/protein/Osativa_v7_0/LOC_Os05g40770.2	LOC_Os05g40770.2	O.sativa v7.0	2.83e-75	42	365	+/+	seq.submitted 2021-10-26T21:32:21.193Z UTC	513	872	317	673	262.307	153	211	13	925	738
	phytozome-next.jgi.doe.gov/report/protein/Osativa_v7_0/LOC_Os03g17300.4	LOC_Os03g17300.4	O.sativa v7.0	3.12e-75	47	292	+/+	seq.submitted 2021-10-26T21:32:21.193Z UTC	586	875	497	786	264.233	138	187	4	925	840
	phytozome-next.jgi.doe.gov/report/protein/Osativa_v7_0/LOC_Os03g17300.2	LOC_Os03g17300.2	O.sativa v7.0	3.12e-75	47	292	+/+	seq.submitted 2021-10-26T21:32:21.193Z UTC	586	875	497	786	264.233	138	187	4	925	840
	phytozome-next.jgi.doe.gov/report/protein/Osativa_v7_0/LOC_Os03g17300.3	LOC_Os03g17300.3	O.sativa v7.0	3.12e-75	47	292	+/+	seq.submitted 2021-10-26T21:32:21.193Z UTC	586	875	497	786	264.233	138	187	4	925	840
	phytozome-next.jgi.doe.gov/report/protein/Osativa_v7_0/LOC_Os03g17300.1	LOC_Os03g17300.1	O.sativa v7.0	3.32e-75	47	292	+/+	seq.submitted 2021-10-26T21:32:21.193Z UTC	586	875	497	786	264.233	138	187	4	925	844
	phytozome-next.jgi.doe.gov/report/protein/Osativa_v7_0/LOC_Os05g25450.1	LOC_Os05g25450.1	O.sativa v7.0	5.51e-75	39	384	+/+	seq.submitted 2021-10-26T21:32:21.193Z UTC	504	875	426	807	264.233	149	220	14	925	882
	phytozome-next.jgi.doe.gov/report/protein/Osativa_v7_0/LOC_Os05g25450.2	LOC_Os05g25450.2	O.sativa v7.0	5.51e-75	39	384	+/+	seq.submitted 2021-10-26T21:32:21.193Z UTC	504	875	426	807	264.233	149	220	14	925	882
	phytozome-next.jgi.doe.gov/report/protein/Osativa_v7_0/LOC_Os05g15720.1	LOC_Os05g15720.1	O.sativa v7.0	4.27e-74	29	834	+/+	seq.submitted 2021-10-26T21:32:21.193Z UTC	92	875	134	889	263.462	238	388	128	925	975
	phytozome-next.jgi.doe.gov/report/protein/Osativa_v7_0/LOC_Os05g40770.1	LOC_Os05g40770.1	O.sativa v7.0	7.14e-74	42	365	+/+	seq.submitted 2021-10-26T21:32:21.193Z UTC	513	872	549	905	262.692	153	211	13	925	970
	phytozome-next.jgi.doe.gov/report/protein/Osativa_v7_0/LOC_Os05g40770.1	LOC_Os05g40770.1	O.sativa v7.0	0.0129	31	86	+/+	seq.submitted 2021-10-26T21:32:21.193Z UTC	356	441	24	99	40.0466	27	43	10	925	970
	phytozome-next.jgi.doe.gov/report/protein/Osativa_v7_0/LOC_Os04g32310.1	LOC_Os04g32310.1	O.sativa v7.0	7.42e-74	45	292	+/+	seq.submitted 2021-10-26T21:32:21.193Z UTC	581	868	64	355	250.751	132	185	4	925	455
	phytozome-next.jgi.doe.gov/report/protein/Osativa_v7_0/LOC_Os04g52860.1	LOC_Os04g52860.1	O.sativa v7.0	7.52e-74	43	310	+/+	seq.submitted 2021-10-26T21:32:21.193Z UTC	584	891	503	810	260.381	132	192	4	925	845
	phytozome-next.jgi.doe.gov/report/protein/Osativa_v7_0/LOC_Os04g52860.1	LOC_Os04g52860.1	O.sativa v7.0	0.00554	30	142	+/+	seq.submitted 2021-10-26T21:32:21.193Z UTC	230	349	263	396	41.2022	42	62	30	925	845
	phytozome-next.jgi.doe.gov/report/protein/Osativa_v7_0/LOC_Os01g14926.1	LOC_Os01g14926.1	O.sativa v7.0	2.47e-73	42	318	+/+	seq.submitted 2021-10-26T21:32:21.193Z UTC	584	894	71	387	248.825	133	194	8	925	438
	phytozome-next.jgi.doe.gov/report/protein/Osativa_v7_0/LOC_Os03g03280.1	LOC_Os03g03280.1	O.sativa v7.0	3.97e-73	47	291	+/+	seq.submitted 2021-10-26T21:32:21.193Z UTC	587	875	606	894	260.381	138	184	4	925	956
	phytozome-next.jgi.doe.gov/report/protein/Osativa_v7_0/LOC_Os06g29080.1	LOC_Os06g29080.1	O.sativa v7.0	5.8e-73	42	323	+/+	seq.submitted 2021-10-26T21:32:21.193Z UTC	586	901	398	717	256.144	137	204	10	925	749
	phytozome-next.jgi.doe.gov/report/protein/Osativa_v7_0/LOC_Os06g51170.1	LOC_Os06g51170.1	O.sativa v7.0	8.48e-73	41	320	+/+	seq.submitted 2021-10-26T21:32:21.193Z UTC	574	880	69	387	246.514	132	199	14	925	415
	phytozome-next.jgi.doe.gov/report/protein/Osativa_v7_0/LOC_Os01g71000.1	LOC_Os01g71000.1	O.sativa v7.0	1.05e-72	44	308	+/+	seq.submitted 2021-10-26T21:32:21.193Z UTC	570	868	49	356	248.825	134	190	9	925	492
	phytozome-next.jgi.doe.gov/report/protein/Osativa_v7_0/LOC_Os05g25370.1	LOC_Os05g25370.1	O.sativa v7.0	1.91e-72	44	311	+/+	seq.submitted 2021-10-26T21:32:21.193Z UTC	586	893	501	809	256.529	137	192	5	925	847
	phytozome-next.jgi.doe.gov/report/protein/Osativa_v7_0/LOC_Os02g30900.1	LOC_Os02g30900.1	O.sativa v7.0	3.05e-72	44	310	+/+	seq.submitted 2021-10-26T21:32:21.193Z UTC	564	868	87	396	248.44	136	190	5	925	527
	phytozome-next.jgi.doe.gov/report/protein/Osativa_v7_0/LOC_Os01g14932.2	LOC_Os01g14932.2	O.sativa v7.0	3.13e-72	40	362	+/+	seq.submitted 2021-10-26T21:32:21.193Z UTC	517	869	289	643	253.062	143	212	16	925	709
	phytozome-next.jgi.doe.gov/report/protein/Osativa_v7_0/LOC_Os09g17910.1	LOC_Os09g17910.1	O.sativa v7.0	4.48e-72	43	298	+/+	seq.submitted 2021-10-26T21:32:21.193Z UTC	578	875	481	774	254.603	129	187	4	925	805
	phytozome-next.jgi.doe.gov/report/protein/Osativa_v7_0/LOC_Os09g17910.1	LOC_Os09g17910.1	O.sativa v7.0	1.13e-19	26	456	+/+	seq.submitted 2021-10-26T21:32:21.193Z UTC	14	442	1	405	95.1301	120	178	78	925	805
	phytozome-next.jgi.doe.gov/report/protein/Osativa_v7_0/LOC_Os01g14932.1	LOC_Os01g14932.1	O.sativa v7.0	5.48e-72	40	362	+/+	seq.submitted 2021-10-26T21:32:21.193Z UTC	517	869	320	674	253.062	143	212	16	925	740
	phytozome-next.jgi.doe.gov/report/protein/Osativa_v7_0/LOC_Os07g47270.1	LOC_Os07g47270.1	O.sativa v7.0	1.11e-71	45	289	+/+	seq.submitted 2021-10-26T21:32:21.193Z UTC	583	868	64	352	245.358	129	181	3	925	480
	phytozome-next.jgi.doe.gov/report/protein/Osativa_v7_0/LOC_Os05g30870.2	LOC_Os05g30870.2	O.sativa v7.0	1.24e-71	43	308	+/+	seq.submitted 2021-10-26T21:32:21.193Z UTC	570	868	22	329	244.973	132	188	9	925	468
	phytozome-next.jgi.doe.gov/report/protein/Osativa_v7_0/LOC_Os10g25550.1	LOC_Os10g25550.1	O.sativa v7.0	1.52e-71	41	333	+/+	seq.submitted 2021-10-26T21:32:21.193Z UTC	570	887	59	388	242.276	137	202	18	925	390
	phytozome-next.jgi.doe.gov/report/protein/Osativa_v7_0/LOC_Os01g12720.1	LOC_Os01g12720.1	O.sativa v7.0	2.51e-71	44	297	+/+	seq.submitted 2021-10-26T21:32:21.193Z UTC	586	876	211	504	248.054	132	192	9	925	598
	phytozome-next.jgi.doe.gov/report/protein/Osativa_v7_0/LOC_Os01g56330.1	LOC_Os01g56330.1	O.sativa v7.0	2.75e-71	45	298	+/+	seq.submitted 2021-10-26T21:32:21.193Z UTC	586	880	531	826	254.218	134	188	5	925	897
	phytozome-next.jgi.doe.gov/report/protein/Osativa_v7_0/LOC_Os05g30870.1	LOC_Os05g30870.1	O.sativa v7.0	2.88e-71	43	308	+/+	seq.submitted 2021-10-26T21:32:21.193Z UTC	570	868	46	353	244.588	132	188	9	925	492
	phytozome-next.jgi.doe.gov/report/protein/Osativa_v7_0/LOC_Os01g21960.1	LOC_Os01g21960.1	O.sativa v7.0	3.21e-71	46	286	+/+	seq.submitted 2021-10-26T21:32:21.193Z UTC	586	869	181	465	245.358	131	183	3	925	517
	phytozome-next.jgi.doe.gov/report/protein/Osativa_v7_0/LOC_Os03g21540.1	LOC_Os03g21540.1	O.sativa v7.0	5.16e-71	45	298	+/+	seq.submitted 2021-10-26T21:32:21.193Z UTC	586	880	528	823	253.447	133	188	5	925	894
	phytozome-next.jgi.doe.gov/report/protein/Osativa_v7_0/LOC_Os03g21540.1	LOC_Os03g21540.1	O.sativa v7.0	0.00342	31	113	+/+	seq.submitted 2021-10-26T21:32:21.193Z UTC	197	308	277	366	41.5874	35	50	24	925	894
	phytozome-next.jgi.doe.gov/report/protein/Osativa_v7_0/LOC_Os07g49470.1	LOC_Os07g49470.1	O.sativa v7.0	5.8e-71	42	312	+/+	seq.submitted 2021-10-26T21:32:21.193Z UTC	568	868	50	361	240.736	131	184	11	925	391
	phytozome-next.jgi.doe.gov/report/protein/Osativa_v7_0/LOC_Os01g51290.2	LOC_Os01g51290.2	O.sativa v7.0	1.25e-70	43	306	+/+	seq.submitted 2021-10-26T21:32:21.193Z UTC	582	884	345	647	249.21	133	192	6	925	737
	phytozome-next.jgi.doe.gov/report/protein/Osativa_v7_0/LOC_Os05g24010.3	LOC_Os05g24010.3	O.sativa v7.0	1.35e-70	41	367	+/+	seq.submitted 2021-10-26T21:32:21.193Z UTC	517	878	265	621	248.054	149	216	15	925	683
	phytozome-next.jgi.doe.gov/report/protein/Osativa_v7_0/LOC_Os09g39930.1	LOC_Os09g39930.1	O.sativa v7.0	1.53e-70	44	307	+/+	seq.submitted 2021-10-26T21:32:21.193Z UTC	581	880	92	397	240.35	134	187	8	925	420
	phytozome-next.jgi.doe.gov/report/protein/Osativa_v7_0/LOC_Os01g06280.2	LOC_Os01g06280.2	O.sativa v7.0	2.5e-70	43	324	+/+	seq.submitted 2021-10-26T21:32:21.193Z UTC	586	904	529	844	251.521	139	192	13	925	895
	phytozome-next.jgi.doe.gov/report/protein/Osativa_v7_0/LOC_Os01g06280.1	LOC_Os01g06280.1	O.sativa v7.0	2.5e-70	43	324	+/+	seq.submitted 2021-10-26T21:32:21.193Z UTC	586	904	529	844	251.521	139	192	13	925	895
	phytozome-next.jgi.doe.gov/report/protein/Osativa_v7_0/LOC_Os05g03460.1	LOC_Os05g03460.1	O.sativa v7.0	2.68e-70	44	294	+/+	seq.submitted 2021-10-26T21:32:21.193Z UTC	578	868	70	363	240.736	129	178	3	925	444
	phytozome-next.jgi.doe.gov/report/protein/Osativa_v7_0/LOC_Os01g02040.1	LOC_Os01g02040.1	O.sativa v7.0	3.12e-70	39	359	+/+	seq.submitted 2021-10-26T21:32:21.193Z UTC	531	869	279	634	247.284	141	211	23	925	699
	phytozome-next.jgi.doe.gov/report/protein/Osativa_v7_0/LOC_Os05g02020.2	LOC_Os05g02020.2	O.sativa v7.0	4.07e-70	40	338	+/+	seq.submitted 2021-10-26T21:32:21.193Z UTC	571	892	41	377	238.424	136	200	17	925	394
	phytozome-next.jgi.doe.gov/report/protein/Osativa_v7_0/LOC_Os10g35450.1	LOC_Os10g35450.1	O.sativa v7.0	5.06e-70	44	286	+/+	seq.submitted 2021-10-26T21:32:21.193Z UTC	586	869	177	461	241.891	126	183	3	925	510
	phytozome-next.jgi.doe.gov/report/protein/Osativa_v7_0/LOC_Os05g02020.1	LOC_Os05g02020.1	O.sativa v7.0	6.46e-70	40	338	+/+	seq.submitted 2021-10-26T21:32:21.193Z UTC	571	892	43	379	238.039	136	200	17	925	396
	phytozome-next.jgi.doe.gov/report/protein/Osativa_v7_0/LOC_Os03g60710.1	LOC_Os03g60710.1	O.sativa v7.0	1.4e-69	44	307	+/+	seq.submitted 2021-10-26T21:32:21.193Z UTC	577	870	57	362	238.039	134	187	14	925	425
	phytozome-next.jgi.doe.gov/report/protein/Osativa_v7_0/LOC_Os05g01040.2	LOC_Os05g01040.2	O.sativa v7.0	1.42e-69	45	290	+/+	seq.submitted 2021-10-26T21:32:21.193Z UTC	586	869	56	342	236.884	130	192	9	925	397
	phytozome-next.jgi.doe.gov/report/protein/Osativa_v7_0/LOC_Os05g01040.1	LOC_Os05g01040.1	O.sativa v7.0	1.42e-69	45	290	+/+	seq.submitted 2021-10-26T21:32:21.193Z UTC	586	869	56	342	236.884	130	192	9	925	397
	phytozome-next.jgi.doe.gov/report/protein/Osativa_v7_0/LOC_Os05g01040.3	LOC_Os05g01040.3	O.sativa v7.0	1.42e-69	45	290	+/+	seq.submitted 2021-10-26T21:32:21.193Z UTC	586	869	56	342	236.884	130	192	9	925	397
	phytozome-next.jgi.doe.gov/report/protein/Osativa_v7_0/LOC_Os03g17550.1	LOC_Os03g17550.1	O.sativa v7.0	1.75e-69	43	268	+/+	seq.submitted 2021-10-26T21:32:21.193Z UTC	601	868	76	343	236.498	115	172	0	925	388
	phytozome-next.jgi.doe.gov/report/protein/Osativa_v7_0/LOC_Os05g12680.1	LOC_Os05g12680.1	O.sativa v7.0	1.87e-69	43	297	+/+	seq.submitted 2021-10-26T21:32:21.193Z UTC	586	876	289	582	244.588	127	194	9	925	676
	phytozome-next.jgi.doe.gov/report/protein/Osativa_v7_0/LOC_Os09g18594.2	LOC_Os09g18594.2	O.sativa v7.0	2.43e-69	42	311	+/+	seq.submitted 2021-10-26T21:32:21.193Z UTC	584	892	126	432	239.195	132	183	6	925	481
	phytozome-next.jgi.doe.gov/report/protein/Osativa_v7_0/LOC_Os05g11750.1	LOC_Os05g11750.1	O.sativa v7.0	2.64e-69	44	293	+/+	seq.submitted 2021-10-26T21:32:21.193Z UTC	582	868	113	405	237.269	130	184	6	925	425
	phytozome-next.jgi.doe.gov/report/protein/Osativa_v7_0/LOC_Os05g11750.3	LOC_Os05g11750.3	O.sativa v7.0	2.64e-69	44	293	+/+	seq.submitted 2021-10-26T21:32:21.193Z UTC	582	868	113	405	237.269	130	184	6	925	425
	phytozome-next.jgi.doe.gov/report/protein/Osativa_v7_0/LOC_Os05g11750.2	LOC_Os05g11750.2	O.sativa v7.0	2.64e-69	44	293	+/+	seq.submitted 2021-10-26T21:32:21.193Z UTC	582	868	113	405	237.269	130	184	6	925	425
	phytozome-next.jgi.doe.gov/report/protein/Osativa_v7_0/LOC_Os05g24010.1	LOC_Os05g24010.1	O.sativa v7.0	3.7e-69	41	367	+/+	seq.submitted 2021-10-26T21:32:21.193Z UTC	517	878	526	882	248.825	149	216	15	925	944
	phytozome-next.jgi.doe.gov/report/protein/Osativa_v7_0/LOC_Os01g57940.1	LOC_Os01g57940.1	O.sativa v7.0	3.85e-69	45	287	+/+	seq.submitted 2021-10-26T21:32:21.193Z UTC	586	868	133	419	238.039	128	178	4	925	468
	phytozome-next.jgi.doe.gov/report/protein/Osativa_v7_0/LOC_Os06g07230.1	LOC_Os06g07230.1	O.sativa v7.0	3.86e-69	41	321	+/+	seq.submitted 2021-10-26T21:32:21.193Z UTC	586	893	94	410	236.498	132	193	17	925	412
	phytozome-next.jgi.doe.gov/report/protein/Osativa_v7_0/LOC_Os05g24010.2	LOC_Os05g24010.2	O.sativa v7.0	4.3e-69	41	367	+/+	seq.submitted 2021-10-26T21:32:21.193Z UTC	517	878	523	879	248.44	149	216	15	925	941
	phytozome-next.jgi.doe.gov/report/protein/Osativa_v7_0/LOC_Os09g18159.1	LOC_Os09g18159.1	O.sativa v7.0	4.61e-69	41	313	+/+	seq.submitted 2021-10-26T21:32:21.193Z UTC	586	898	362	669	243.432	128	193	5	925	676
	phytozome-next.jgi.doe.gov/report/protein/Osativa_v7_0/LOC_Os09g18159.1	LOC_Os09g18159.1	O.sativa v7.0	3.57e-15	31	296	+/+	seq.submitted 2021-10-26T21:32:21.193Z UTC	164	442	15	258	80.4925	92	134	69	925	676
	phytozome-next.jgi.doe.gov/report/protein/Osativa_v7_0/LOC_Os02g09359.1	LOC_Os02g09359.1	O.sativa v7.0	4.82e-69	42	293	+/+	seq.submitted 2021-10-26T21:32:21.193Z UTC	579	869	22	313	234.958	123	181	3	925	378
	phytozome-next.jgi.doe.gov/report/protein/Osativa_v7_0/LOC_Os01g51290.1	LOC_Os01g51290.1	O.sativa v7.0	4.91e-69	43	306	+/+	seq.submitted 2021-10-26T21:32:21.193Z UTC	582	884	594	896	248.825	133	192	6	925	986
	phytozome-next.jgi.doe.gov/report/protein/Osativa_v7_0/LOC_Os06g16330.1	LOC_Os06g16330.1	O.sativa v7.0	9.29e-69	35	504	+/+	seq.submitted 2021-10-26T21:32:21.193Z UTC	409	895	122	603	241.891	178	270	39	925	641
	phytozome-next.jgi.doe.gov/report/protein/Osativa_v7_0/LOC_Os03g16260.1	LOC_Os03g16260.1	O.sativa v7.0	9.57e-69	38	375	+/+	seq.submitted 2021-10-26T21:32:21.193Z UTC	542	893	176	537	239.965	142	212	36	925	569
	phytozome-next.jgi.doe.gov/report/protein/Osativa_v7_0/LOC_Os01g44110.1	LOC_Os01g44110.1	O.sativa v7.0	1.19e-68	43	286	+/+	seq.submitted 2021-10-26T21:32:21.193Z UTC	586	869	174	458	238.039	124	182	3	925	510
	phytozome-next.jgi.doe.gov/report/protein/Osativa_v7_0/LOC_Os04g47620.1	LOC_Os04g47620.1	O.sativa v7.0	1.43e-68	41	325	+/+	seq.submitted 2021-10-26T21:32:21.193Z UTC	557	868	104	417	236.884	133	192	24	925	476
	phytozome-next.jgi.doe.gov/report/protein/Osativa_v7_0/LOC_Os09g17970.1	LOC_Os09g17970.1	O.sativa v7.0	1.97e-68	41	297	+/+	seq.submitted 2021-10-26T21:32:21.193Z UTC	581	877	195	487	237.654	122	182	4	925	515
	phytozome-next.jgi.doe.gov/report/protein/Osativa_v7_0/LOC_Os02g06930.2	LOC_Os02g06930.2	O.sativa v7.0	2.06e-68	42	297	+/+	seq.submitted 2021-10-26T21:32:21.193Z UTC	581	875	28	323	233.802	124	178	3	925	389
	phytozome-next.jgi.doe.gov/report/protein/Osativa_v7_0/LOC_Os01g72990.1	LOC_Os01g72990.1	O.sativa v7.0	2.55e-68	44	299	+/+	seq.submitted 2021-10-26T21:32:21.193Z UTC	578	869	592	882	246.514	133	191	15	925	953
	phytozome-next.jgi.doe.gov/report/protein/Osativa_v7_0/LOC_Os01g72990.2	LOC_Os01g72990.2	O.sativa v7.0	2.55e-68	44	299	+/+	seq.submitted 2021-10-26T21:32:21.193Z UTC	578	869	592	882	246.514	133	191	15	925	953
	phytozome-next.jgi.doe.gov/report/protein/Osativa_v7_0/LOC_Os03g21230.1	LOC_Os03g21230.1	O.sativa v7.0	2.6e-68	44	292	+/+	seq.submitted 2021-10-26T21:32:21.193Z UTC	586	875	628	917	246.899	129	182	4	925	976
	phytozome-next.jgi.doe.gov/report/protein/Osativa_v7_0/LOC_Os03g21230.1	LOC_Os03g21230.1	O.sativa v7.0	0.00145	27	88	+/+	seq.submitted 2021-10-26T21:32:21.193Z UTC	357	442	34	111	43.1282	24	46	12	925	976
	phytozome-next.jgi.doe.gov/report/protein/Osativa_v7_0/LOC_Os03g16740.1	LOC_Os03g16740.1	O.sativa v7.0	2.95e-68	41	327	+/+	seq.submitted 2021-10-26T21:32:21.193Z UTC	556	869	40	364	232.646	135	195	15	925	375
	phytozome-next.jgi.doe.gov/report/protein/Osativa_v7_0/LOC_Os08g10070.1	LOC_Os08g10070.1	O.sativa v7.0	3.26e-68	44	289	+/+	seq.submitted 2021-10-26T21:32:21.193Z UTC	582	868	23	310	232.261	126	174	3	925	370
	phytozome-next.jgi.doe.gov/report/protein/Osativa_v7_0/LOC_Os08g10070.2	LOC_Os08g10070.2	O.sativa v7.0	3.26e-68	44	289	+/+	seq.submitted 2021-10-26T21:32:21.193Z UTC	582	868	23	310	232.261	126	174	3	925	370
		Paralogs	Protein/splice variant	Species	E-value	% identity	Align len	Strands	Query ID	Query from	Query to	Target from	Target to	Bitscore
		1	LOC_Os07g38070.1	O.sativa v7.0	0	57	546	+/+	seq.submitted 2021-10-26T21:32:21.193Z UTC	362	901	34	549	594.349
		2	LOC_Os09g18020.1	O.sativa v7.0	5.94e-111	32	865	+/+	seq.submitted 2021-10-26T21:32:21.193Z UTC	78	893	74	863	362.459
		3	LOC_Os09g19229.1	O.sativa v7.0	7.48e-110	33	830	+/+	seq.submitted 2021-10-26T21:32:21.193Z UTC	77	880	71	832	359.377
		4	LOC_Os11g01200.1	O.sativa v7.0	7.45e-111	32	892	+/+	seq.submitted 2021-10-26T21:32:21.193Z UTC	26	875	19	877	363.614
			LOC_Os11g01200.2	O.sativa v7.0	7.45e-111	32	892	+/+	seq.submitted 2021-10-26T21:32:21.193Z UTC	26	875	19	877	363.614
		5	LOC_Os12g01200.1	O.sativa v7.0	3.76e-111	33	904	+/+	seq.submitted 2021-10-26T21:32:21.193Z UTC	14	875	6	874	364.385
			LOC_Os12g01200.2	O.sativa v7.0	3.76e-111	33	904	+/+	seq.submitted 2021-10-26T21:32:21.193Z UTC	14	875	6	874	364.385
			LOC_Os12g01200.3	O.sativa v7.0	3.76e-111	33	904	+/+	seq.submitted 2021-10-26T21:32:21.193Z UTC	14	875	6	874	364.385

## Sheet: Triticum
	Views	Protein	Species	E-value	% identity	Align len	Strands	Query ID	Query from	Query to	Target from	Target to	Bitscore	# identical	Positives	Gaps	Query len	Target len
	phytozome-next.jgi.doe.gov/report/protein/Taestivum_v2_2/Traes_2BS_91EC0D1B7.1	Traes_2BS_91EC0D1B7.1	T.aestivum v2.2	0	55	549	+/+	seq.submitted 2021-10-26T21:33:52.312Z UTC	362	901	33	551	579.711	300	383	39	925	588
	phytozome-next.jgi.doe.gov/report/protein/Taestivum_v2_2/Traes_2DS_29ED1D7E0.1	Traes_2DS_29ED1D7E0.1	T.aestivum v2.2	0	54	549	+/+	seq.submitted 2021-10-26T21:33:52.312Z UTC	362	901	33	551	565.459	295	377	39	925	588
	phytozome-next.jgi.doe.gov/report/protein/Taestivum_v2_2/Traes_2AS_E77AB4BD1.1	Traes_2AS_E77AB4BD1.1	T.aestivum v2.2	0	55	529	+/+	seq.submitted 2021-10-26T21:33:52.312Z UTC	382	901	2	500	563.148	292	368	39	925	537
	phytozome-next.jgi.doe.gov/report/protein/Taestivum_v2_2/Traes_2AS_E77AB4BD1.3	Traes_2AS_E77AB4BD1.3	T.aestivum v2.2	1.55e-178	60	442	+/+	seq.submitted 2021-10-26T21:33:52.312Z UTC	468	901	6	441	528.094	267	329	14	925	478
	phytozome-next.jgi.doe.gov/report/protein/Taestivum_v2_2/Traes_2DS_29ED1D7E0.2	Traes_2DS_29ED1D7E0.2	T.aestivum v2.2	1.5e-171	65	384	+/+	seq.submitted 2021-10-26T21:33:52.312Z UTC	520	901	37	414	509.22	248	299	8	925	451
	phytozome-next.jgi.doe.gov/report/protein/Taestivum_v2_2/Traes_2AS_E77AB4BD1.2	Traes_2AS_E77AB4BD1.2	T.aestivum v2.2	1.77e-133	57	379	+/+	seq.submitted 2021-10-26T21:33:52.312Z UTC	468	840	5	372	412.92	215	265	17	925	502
	phytozome-next.jgi.doe.gov/report/protein/Taestivum_v2_2/Traes_2BS_91EC0D1B7.3	Traes_2BS_91EC0D1B7.3	T.aestivum v2.2	4.75e-115	78	214	+/+	seq.submitted 2021-10-26T21:33:52.312Z UTC	683	894	5	218	355.525	167	188	2	925	261
	phytozome-next.jgi.doe.gov/report/protein/Taestivum_v2_2/Traes_5BL_B81842E5B.1	Traes_5BL_B81842E5B.1	T.aestivum v2.2	4.92e-111	33	838	+/+	seq.submitted 2021-10-26T21:33:52.312Z UTC	83	875	73	876	366.696	277	415	79	925	923
	phytozome-next.jgi.doe.gov/report/protein/Taestivum_v2_2/Traes_5AL_44570C8AA.1	Traes_5AL_44570C8AA.1	T.aestivum v2.2	3.12e-110	33	839	+/+	seq.submitted 2021-10-26T21:33:52.312Z UTC	83	875	114	917	365.54	279	416	81	925	964
	phytozome-next.jgi.doe.gov/report/protein/Taestivum_v2_2/Traes_5DL_DA76A0727.1	Traes_5DL_DA76A0727.1	T.aestivum v2.2	2.6e-109	33	839	+/+	seq.submitted 2021-10-26T21:33:52.312Z UTC	83	875	73	876	362.073	278	415	81	925	923
	phytozome-next.jgi.doe.gov/report/protein/Taestivum_v2_2/Traes_5AL_44570C8AA.2	Traes_5AL_44570C8AA.2	T.aestivum v2.2	3.92e-109	34	817	+/+	seq.submitted 2021-10-26T21:33:52.312Z UTC	105	875	9	790	359.377	274	409	81	925	837
	phytozome-next.jgi.doe.gov/report/protein/Taestivum_v2_2/Traes_2BS_91EC0D1B7.2	Traes_2BS_91EC0D1B7.2	T.aestivum v2.2	4.78e-108	50	371	+/+	seq.submitted 2021-10-26T21:33:52.312Z UTC	420	784	1	342	340.502	185	235	35	925	343
	phytozome-next.jgi.doe.gov/report/protein/Taestivum_v2_2/Traes_5DL_DA76A0727.3	Traes_5DL_DA76A0727.3	T.aestivum v2.2	2.08e-101	38	556	+/+	seq.submitted 2021-10-26T21:33:52.312Z UTC	332	875	92	624	333.954	213	309	35	925	671
	phytozome-next.jgi.doe.gov/report/protein/Taestivum_v2_2/Traes_1DL_5F7868CCC.1	Traes_1DL_5F7868CCC.1	T.aestivum v2.2	6.24e-99	31	835	+/+	seq.submitted 2021-10-26T21:33:52.312Z UTC	82	875	7	799	332.798	257	405	83	925	862
	phytozome-next.jgi.doe.gov/report/protein/Taestivum_v2_2/Traes_3B_F6ED31358.1	Traes_3B_F6ED31358.1	T.aestivum v2.2	7.5e-99	31	859	+/+	seq.submitted 2021-10-26T21:33:52.312Z UTC	91	899	20	831	332.028	269	414	97	925	840
	phytozome-next.jgi.doe.gov/report/protein/Taestivum_v2_2/Traes_1BS_C7BCFEFA4.3	Traes_1BS_C7BCFEFA4.3	T.aestivum v2.2	1.11e-97	31	883	+/+	seq.submitted 2021-10-26T21:33:52.312Z UTC	61	895	21	863	330.102	278	424	88	925	903
	phytozome-next.jgi.doe.gov/report/protein/Taestivum_v2_2/Traes_1BS_C7BCFEFA4.5	Traes_1BS_C7BCFEFA4.5	T.aestivum v2.2	1.31e-96	32	882	+/+	seq.submitted 2021-10-26T21:33:52.312Z UTC	61	895	21	857	327.02	279	424	92	925	897
	phytozome-next.jgi.doe.gov/report/protein/Taestivum_v2_2/Traes_1BS_C7BCFEFA4.1	Traes_1BS_C7BCFEFA4.1	T.aestivum v2.2	4.43e-96	31	933	+/+	seq.submitted 2021-10-26T21:33:52.312Z UTC	12	895	7	895	326.635	288	441	93	925	935
	phytozome-next.jgi.doe.gov/report/protein/Taestivum_v2_2/Traes_1BS_C7BCFEFA4.4	Traes_1BS_C7BCFEFA4.4	T.aestivum v2.2	4.86e-96	31	883	+/+	seq.submitted 2021-10-26T21:33:52.312Z UTC	61	895	21	860	325.479	278	424	91	925	900
	phytozome-next.jgi.doe.gov/report/protein/Taestivum_v2_2/Traes_1BL_F5C61E8A2.1	Traes_1BL_F5C61E8A2.1	T.aestivum v2.2	4.15e-94	31	851	+/+	seq.submitted 2021-10-26T21:33:52.312Z UTC	83	875	85	879	321.242	263	407	114	925	938
	phytozome-next.jgi.doe.gov/report/protein/Taestivum_v2_2/Traes_5DS_8D9B4DE61.3	Traes_5DS_8D9B4DE61.3	T.aestivum v2.2	1.4e-93	32	712	+/+	seq.submitted 2021-10-26T21:33:52.312Z UTC	203	875	43	702	315.464	230	336	91	925	761
	phytozome-next.jgi.doe.gov/report/protein/Taestivum_v2_2/Traes_5AL_44570C8AA.3	Traes_5AL_44570C8AA.3	T.aestivum v2.2	1.32e-92	32	809	+/+	seq.submitted 2021-10-26T21:33:52.312Z UTC	105	875	9	734	313.538	255	376	121	925	781
	phytozome-next.jgi.doe.gov/report/protein/Taestivum_v2_2/Traes_1BS_C7BCFEFA4.7	Traes_1BS_C7BCFEFA4.7	T.aestivum v2.2	2.08e-92	32	789	+/+	seq.submitted 2021-10-26T21:33:52.312Z UTC	141	895	13	758	313.538	252	386	77	925	798
	phytozome-next.jgi.doe.gov/report/protein/Taestivum_v2_2/Traes_5BL_B81842E5B.2	Traes_5BL_B81842E5B.2	T.aestivum v2.2	4.55e-92	31	810	+/+	seq.submitted 2021-10-26T21:33:52.312Z UTC	105	875	9	734	311.997	254	376	123	925	781
	phytozome-next.jgi.doe.gov/report/protein/Taestivum_v2_2/Traes_5DL_D765A0EEB.1	Traes_5DL_D765A0EEB.1	T.aestivum v2.2	5.75e-92	30	862	+/+	seq.submitted 2021-10-26T21:33:52.312Z UTC	78	896	85	893	314.694	257	400	96	925	901
	phytozome-next.jgi.doe.gov/report/protein/Taestivum_v2_2/Traes_5AL_140D4BD4A.1	Traes_5AL_140D4BD4A.1	T.aestivum v2.2	1.81e-91	30	863	+/+	seq.submitted 2021-10-26T21:33:52.312Z UTC	78	892	49	854	312.383	259	400	105	925	867
	phytozome-next.jgi.doe.gov/report/protein/Taestivum_v2_2/Traes_5DL_DA76A0727.2	Traes_5DL_DA76A0727.2	T.aestivum v2.2	3.17e-91	32	809	+/+	seq.submitted 2021-10-26T21:33:52.312Z UTC	105	875	9	734	309.686	255	379	121	925	781
	phytozome-next.jgi.doe.gov/report/protein/Taestivum_v2_2/Traes_1BS_C7BCFEFA4.6	Traes_1BS_C7BCFEFA4.6	T.aestivum v2.2	1.64e-88	30	893	+/+	seq.submitted 2021-10-26T21:33:52.312Z UTC	61	895	21	838	304.679	265	401	133	925	878
	phytozome-next.jgi.doe.gov/report/protein/Taestivum_v2_2/Traes_1DL_21384B2A9.1	Traes_1DL_21384B2A9.1	T.aestivum v2.2	8.87e-88	34	514	+/+	seq.submitted 2021-10-26T21:33:52.312Z UTC	380	875	9	496	292.352	175	273	44	925	502
	phytozome-next.jgi.doe.gov/report/protein/Taestivum_v2_2/Traes_4DL_D0237CA32.1	Traes_4DL_D0237CA32.1	T.aestivum v2.2	2.23e-87	31	866	+/+	seq.submitted 2021-10-26T21:33:52.312Z UTC	70	869	71	869	302.753	265	403	133	925	933
	phytozome-next.jgi.doe.gov/report/protein/Taestivum_v2_2/Traes_1AL_7262657D3.1	Traes_1AL_7262657D3.1	T.aestivum v2.2	8.16e-87	34	637	+/+	seq.submitted 2021-10-26T21:33:52.312Z UTC	274	875	1	588	292.738	217	313	84	925	597
	phytozome-next.jgi.doe.gov/report/protein/Taestivum_v2_2/Traes_3B_347C48C15.1	Traes_3B_347C48C15.1	T.aestivum v2.2	1.12e-86	31	829	+/+	seq.submitted 2021-10-26T21:33:52.312Z UTC	76	872	82	867	300.827	255	394	75	925	930
	phytozome-next.jgi.doe.gov/report/protein/Taestivum_v2_2/Traes_3B_347C48C15.2	Traes_3B_347C48C15.2	T.aestivum v2.2	1.97e-86	31	829	+/+	seq.submitted 2021-10-26T21:33:52.312Z UTC	76	872	79	864	300.056	255	394	75	925	927
	phytozome-next.jgi.doe.gov/report/protein/Taestivum_v2_2/Traes_2AS_E77AB4BD1.4	Traes_2AS_E77AB4BD1.4	T.aestivum v2.2	2.34e-82	77	163	+/+	seq.submitted 2021-10-26T21:33:52.312Z UTC	734	894	1	163	267.314	126	142	2	925	206
	phytozome-next.jgi.doe.gov/report/protein/Taestivum_v2_2/Traes_1BL_3F4BF09B6.1	Traes_1BL_3F4BF09B6.1	T.aestivum v2.2	9.02e-82	35	473	+/+	seq.submitted 2021-10-26T21:33:52.312Z UTC	409	875	29	460	275.018	167	263	47	925	466
	phytozome-next.jgi.doe.gov/report/protein/Taestivum_v2_2/Traes_1DL_3EE5BBEA1.1	Traes_1DL_3EE5BBEA1.1	T.aestivum v2.2	1.16e-79	32	614	+/+	seq.submitted 2021-10-26T21:33:52.312Z UTC	244	835	1	572	273.478	199	303	64	925	606
	phytozome-next.jgi.doe.gov/report/protein/Taestivum_v2_2/Traes_5AL_759E5B9CD.1	Traes_5AL_759E5B9CD.1	T.aestivum v2.2	1.45e-79	47	292	+/+	seq.submitted 2021-10-26T21:33:52.312Z UTC	586	875	365	655	275.789	136	197	3	925	696
	phytozome-next.jgi.doe.gov/report/protein/Taestivum_v2_2/Traes_5DL_C3F830859.1	Traes_5DL_C3F830859.1	T.aestivum v2.2	7.87e-78	47	292	+/+	seq.submitted 2021-10-26T21:33:52.312Z UTC	586	875	498	788	274.248	136	196	3	925	829
	Paralogs	Protein/splice variant	Species	E-value	% identity	Align len	Strands	Query ID	Query from	Query to	Target from	Target to	Bitscore
	1	Traes_2AS_E77AB4BD1.1	T.aestivum v2.2	0	55	529	+/+	seq.submitted 2021-10-26T21:33:52.312Z UTC	382	901	2	500	563.148
	2	Traes_2AS_E77AB4BD1.2	T.aestivum v2.2	1.77e-133	57	379	+/+	seq.submitted 2021-10-26T21:33:52.312Z UTC	468	840	5	372	412.92
		Traes_2AS_E77AB4BD1.3	T.aestivum v2.2	1.55e-178	60	442	+/+	seq.submitted 2021-10-26T21:33:52.312Z UTC	468	901	6	441	528.094
	3	Traes_2BS_91EC0D1B7.1	T.aestivum v2.2	0	55	549	+/+	seq.submitted 2021-10-26T21:33:52.312Z UTC	362	901	33	551	579.711
		Traes_2BS_91EC0D1B7.2	T.aestivum v2.2	4.78e-108	50	371	+/+	seq.submitted 2021-10-26T21:33:52.312Z UTC	420	784	1	342	340.502
		Traes_2BS_91EC0D1B7.3	T.aestivum v2.2	4.75e-115	78	214	+/+	seq.submitted 2021-10-26T21:33:52.312Z UTC	683	894	5	218	355.525
	4	Traes_2DS_29ED1D7E0.1	T.aestivum v2.2	0	54	549	+/+	seq.submitted 2021-10-26T21:33:52.312Z UTC	362	901	33	551	565.459
		Traes_2DS_29ED1D7E0.2	T.aestivum v2.2	1.5e-171	65	384	+/+	seq.submitted 2021-10-26T21:33:52.312Z UTC	520	901	37	414	509.22
	5	Traes_5AL_44570C8AA.1	T.aestivum v2.2	3.12e-110	33	839	+/+	seq.submitted 2021-10-26T21:33:52.312Z UTC	83	875	114	917	365.54
		Traes_5AL_44570C8AA.2	T.aestivum v2.2	3.92e-109	34	817	+/+	seq.submitted 2021-10-26T21:33:52.312Z UTC	105	875	9	790	359.377
	6	Traes_5BL_B81842E5B.1	T.aestivum v2.2	4.92e-111	33	838	+/+	seq.submitted 2021-10-26T21:33:52.312Z UTC	83	875	73	876	366.696
	7	Traes_5DL_DA76A0727.1	T.aestivum v2.2	2.6e-109	33	839	+/+	seq.submitted 2021-10-26T21:33:52.312Z UTC	83	875	73	876	362.073
		Traes_5DL_DA76A0727.3	T.aestivum v2.2	2.08e-101	38	556	+/+	seq.submitted 2021-10-26T21:33:52.312Z UTC	332	875	92	624	333.954

## Sheet: Hordeum
	Views	Protein	Species	E-value	% identity	Align len	Strands	Query ID	Query from	Query to	Target from	Target to	Bitscore	# identical	Positives	Gaps	Query len	Target len
	phytozome-next.jgi.doe.gov/report/protein/Hvulgare_r1/HORVU2Hr1G058820.29	HORVU2Hr1G058820.29	H.vulgare r1	0	54	549	+/+	seq.submitted 2021-10-26T21:37:39.415Z UTC	362	901	72	590	565.844	294	379	39	925	627
	phytozome-next.jgi.doe.gov/report/protein/Hvulgare_r1/HORVU2Hr1G058820.30	HORVU2Hr1G058820.30	H.vulgare r1	0	54	549	+/+	seq.submitted 2021-10-26T21:37:39.415Z UTC	362	901	18	536	565.844	294	378	39	925	573
	phytozome-next.jgi.doe.gov/report/protein/Hvulgare_r1/HORVU2Hr1G058820.11	HORVU2Hr1G058820.11	H.vulgare r1	0	54	549	+/+	seq.submitted 2021-10-26T21:37:39.415Z UTC	362	901	47	565	564.303	294	378	39	925	602
	phytozome-next.jgi.doe.gov/report/protein/Hvulgare_r1/HORVU2Hr1G058820.27	HORVU2Hr1G058820.27	H.vulgare r1	0	53	549	+/+	seq.submitted 2021-10-26T21:37:39.415Z UTC	362	901	44	562	562.377	293	376	39	925	599
	phytozome-next.jgi.doe.gov/report/protein/Hvulgare_r1/HORVU2Hr1G058820.12	HORVU2Hr1G058820.12	H.vulgare r1	0	53	549	+/+	seq.submitted 2021-10-26T21:37:39.415Z UTC	362	901	47	565	561.607	292	378	39	925	602
	phytozome-next.jgi.doe.gov/report/protein/Hvulgare_r1/HORVU2Hr1G058820.10	HORVU2Hr1G058820.10	H.vulgare r1	0	53	549	+/+	seq.submitted 2021-10-26T21:37:39.415Z UTC	362	901	47	565	558.91	292	376	39	925	602
	phytozome-next.jgi.doe.gov/report/protein/Hvulgare_r1/HORVU2Hr1G058820.22	HORVU2Hr1G058820.22	H.vulgare r1	0	52	549	+/+	seq.submitted 2021-10-26T21:37:39.415Z UTC	362	901	50	544	540.421	284	365	63	925	581
	phytozome-next.jgi.doe.gov/report/protein/Hvulgare_r1/HORVU2Hr1G058820.18	HORVU2Hr1G058820.18	H.vulgare r1	3.15e-179	56	497	+/+	seq.submitted 2021-10-26T21:37:39.415Z UTC	413	901	11	477	530.406	276	346	38	925	514
	phytozome-next.jgi.doe.gov/report/protein/Hvulgare_r1/HORVU2Hr1G058820.3	HORVU2Hr1G058820.3	H.vulgare r1	5.62e-178	60	442	+/+	seq.submitted 2021-10-26T21:37:39.415Z UTC	468	901	18	452	526.554	265	328	15	925	489
	phytozome-next.jgi.doe.gov/report/protein/Hvulgare_r1/HORVU2Hr1G058820.24	HORVU2Hr1G058820.24	H.vulgare r1	1.8e-177	55	498	+/+	seq.submitted 2021-10-26T21:37:39.415Z UTC	413	901	11	478	526.168	276	346	39	925	515
	phytozome-next.jgi.doe.gov/report/protein/Hvulgare_r1/HORVU2Hr1G058820.9	HORVU2Hr1G058820.9	H.vulgare r1	2.87e-176	60	439	+/+	seq.submitted 2021-10-26T21:37:39.415Z UTC	471	901	1	432	521.161	263	325	15	925	469
	phytozome-next.jgi.doe.gov/report/protein/Hvulgare_r1/HORVU2Hr1G058820.23	HORVU2Hr1G058820.23	H.vulgare r1	4.73e-175	60	437	+/+	seq.submitted 2021-10-26T21:37:39.415Z UTC	473	901	1	430	518.079	261	324	15	925	467
	phytozome-next.jgi.doe.gov/report/protein/Hvulgare_r1/HORVU2Hr1G058820.31	HORVU2Hr1G058820.31	H.vulgare r1	1.53e-171	64	384	+/+	seq.submitted 2021-10-26T21:37:39.415Z UTC	520	901	25	402	507.294	247	298	8	925	427
	phytozome-next.jgi.doe.gov/report/protein/Hvulgare_r1/HORVU2Hr1G058820.33	HORVU2Hr1G058820.33	H.vulgare r1	5.79e-146	64	332	+/+	seq.submitted 2021-10-26T21:37:39.415Z UTC	520	850	20	346	438.343	213	255	6	925	346
	phytozome-next.jgi.doe.gov/report/protein/Hvulgare_r1/HORVU2Hr1G058820.21	HORVU2Hr1G058820.21	H.vulgare r1	3.85e-145	50	486	+/+	seq.submitted 2021-10-26T21:37:39.415Z UTC	362	840	48	499	449.129	242	313	41	925	696
	phytozome-next.jgi.doe.gov/report/protein/Hvulgare_r1/HORVU2Hr1G058820.26	HORVU2Hr1G058820.26	H.vulgare r1	2.22e-143	49	486	+/+	seq.submitted 2021-10-26T21:37:39.415Z UTC	362	840	44	496	444.506	239	311	40	925	693
	phytozome-next.jgi.doe.gov/report/protein/Hvulgare_r1/HORVU2Hr1G058820.20	HORVU2Hr1G058820.20	H.vulgare r1	7.6e-122	78	225	+/+	seq.submitted 2021-10-26T21:37:39.415Z UTC	672	894	1	225	372.859	175	197	2	925	268
	phytozome-next.jgi.doe.gov/report/protein/Hvulgare_r1/HORVU2Hr1G058820.6	HORVU2Hr1G058820.6	H.vulgare r1	7.6e-122	78	225	+/+	seq.submitted 2021-10-26T21:37:39.415Z UTC	672	894	1	225	372.859	175	197	2	925	268
	phytozome-next.jgi.doe.gov/report/protein/Hvulgare_r1/HORVU2Hr1G058820.28	HORVU2Hr1G058820.28	H.vulgare r1	7.6e-122	78	225	+/+	seq.submitted 2021-10-26T21:37:39.415Z UTC	672	894	1	225	372.859	175	197	2	925	268
	phytozome-next.jgi.doe.gov/report/protein/Hvulgare_r1/HORVU2Hr1G058820.15	HORVU2Hr1G058820.15	H.vulgare r1	1.59e-118	47	438	+/+	seq.submitted 2021-10-26T21:37:39.415Z UTC	361	785	43	451	371.318	204	271	42	925	454
	phytozome-next.jgi.doe.gov/report/protein/Hvulgare_r1/HORVU3Hr1G117680.2	HORVU3Hr1G117680.2	H.vulgare r1	7.44e-117	34	842	+/+	seq.submitted 2021-10-26T21:37:39.415Z UTC	83	880	110	922	382.874	288	431	73	925	973
	phytozome-next.jgi.doe.gov/report/protein/Hvulgare_r1/HORVU3Hr1G117680.8	HORVU3Hr1G117680.8	H.vulgare r1	7.44e-117	34	842	+/+	seq.submitted 2021-10-26T21:37:39.415Z UTC	83	880	110	922	382.874	288	431	73	925	973
	phytozome-next.jgi.doe.gov/report/protein/Hvulgare_r1/HORVU3Hr1G117680.4	HORVU3Hr1G117680.4	H.vulgare r1	8.7e-117	34	842	+/+	seq.submitted 2021-10-26T21:37:39.415Z UTC	83	880	112	924	382.489	288	431	73	925	975
	phytozome-next.jgi.doe.gov/report/protein/Hvulgare_r1/HORVU2Hr1G058820.25	HORVU2Hr1G058820.25	H.vulgare r1	1.67e-112	77	215	+/+	seq.submitted 2021-10-26T21:37:39.415Z UTC	683	894	10	224	348.206	165	187	3	925	267
	phytozome-next.jgi.doe.gov/report/protein/Hvulgare_r1/HORVU5Hr1G048950.2	HORVU5Hr1G048950.2	H.vulgare r1	1.73e-111	33	837	+/+	seq.submitted 2021-10-26T21:37:39.415Z UTC	83	875	73	877	367.081	279	415	76	925	924
	phytozome-next.jgi.doe.gov/report/protein/Hvulgare_r1/HORVU1Hr1G078280.4	HORVU1Hr1G078280.4	H.vulgare r1	3.32e-101	30	951	+/+	seq.submitted 2021-10-26T21:37:39.415Z UTC	2	880	1	899	340.117	287	449	124	925	957
	phytozome-next.jgi.doe.gov/report/protein/Hvulgare_r1/HORVU1Hr1G078300.6	HORVU1Hr1G078300.6	H.vulgare r1	1.31e-100	30	875	+/+	seq.submitted 2021-10-26T21:37:39.415Z UTC	61	875	68	896	337.421	265	417	106	925	902
	phytozome-next.jgi.doe.gov/report/protein/Hvulgare_r1/HORVU1Hr1G078280.3	HORVU1Hr1G078280.3	H.vulgare r1	8.43e-99	31	788	+/+	seq.submitted 2021-10-26T21:37:39.415Z UTC	143	880	15	750	330.102	247	389	102	925	808
	phytozome-next.jgi.doe.gov/report/protein/Hvulgare_r1/HORVU3Hr1G117680.33	HORVU3Hr1G117680.33	H.vulgare r1	1.62e-97	35	664	+/+	seq.submitted 2021-10-26T21:37:39.415Z UTC	242	880	16	633	323.168	230	350	71	925	684
	phytozome-next.jgi.doe.gov/report/protein/Hvulgare_r1/HORVU3Hr1G117680.31	HORVU3Hr1G117680.31	H.vulgare r1	4.37e-97	34	730	+/+	seq.submitted 2021-10-26T21:37:39.415Z UTC	210	880	3	705	323.939	246	371	86	925	756
	phytozome-next.jgi.doe.gov/report/protein/Hvulgare_r1/HORVU5Hr1G021690.5	HORVU5Hr1G021690.5	H.vulgare r1	1.02e-95	31	859	+/+	seq.submitted 2021-10-26T21:37:39.415Z UTC	82	875	96	898	325.094	266	398	121	925	957
	phytozome-next.jgi.doe.gov/report/protein/Hvulgare_r1/HORVU5Hr1G021690.17	HORVU5Hr1G021690.17	H.vulgare r1	1.45e-95	31	838	+/+	seq.submitted 2021-10-26T21:37:39.415Z UTC	105	875	9	791	322.398	259	390	122	925	850
	phytozome-next.jgi.doe.gov/report/protein/Hvulgare_r1/HORVU1Hr1G004790.2	HORVU1Hr1G004790.2	H.vulgare r1	3.34e-93	30	869	+/+	seq.submitted 2021-10-26T21:37:39.415Z UTC	78	892	86	915	318.161	263	411	93	925	952
	phytozome-next.jgi.doe.gov/report/protein/Hvulgare_r1/HORVU1Hr1G004790.1	HORVU1Hr1G004790.1	H.vulgare r1	3.42e-93	30	869	+/+	seq.submitted 2021-10-26T21:37:39.415Z UTC	78	892	86	915	318.161	263	411	93	925	951
	phytozome-next.jgi.doe.gov/report/protein/Hvulgare_r1/HORVU5Hr1G048950.9	HORVU5Hr1G048950.9	H.vulgare r1	5.47e-93	34	762	+/+	seq.submitted 2021-10-26T21:37:39.415Z UTC	83	800	73	801	315.079	259	372	77	925	829
	phytozome-next.jgi.doe.gov/report/protein/Hvulgare_r1/HORVU1Hr1G004790.11	HORVU1Hr1G004790.11	H.vulgare r1	7.73e-93	30	868	+/+	seq.submitted 2021-10-26T21:37:39.415Z UTC	78	892	84	908	317.005	263	409	96	925	945
	phytozome-next.jgi.doe.gov/report/protein/Hvulgare_r1/HORVU5Hr1G048950.1	HORVU5Hr1G048950.1	H.vulgare r1	3.49e-92	44	360	+/+	seq.submitted 2021-10-26T21:37:39.415Z UTC	521	875	60	407	301.597	157	228	17	925	454
	phytozome-next.jgi.doe.gov/report/protein/Hvulgare_r1/HORVU1Hr1G078280.13	HORVU1Hr1G078280.13	H.vulgare r1	3.42e-91	32	699	+/+	seq.submitted 2021-10-26T21:37:39.415Z UTC	202	880	2	647	306.99	224	354	73	925	705
	phytozome-next.jgi.doe.gov/report/protein/Hvulgare_r1/HORVU1Hr1G004790.12	HORVU1Hr1G004790.12	H.vulgare r1	1.1e-90	30	868	+/+	seq.submitted 2021-10-26T21:37:39.415Z UTC	78	892	84	909	311.227	263	407	95	925	943
	phytozome-next.jgi.doe.gov/report/protein/Hvulgare_r1/HORVU3Hr1G117680.35	HORVU3Hr1G117680.35	H.vulgare r1	1.16e-88	39	471	+/+	seq.submitted 2021-10-26T21:37:39.415Z UTC	419	880	2	439	293.508	182	269	42	925	490
	phytozome-next.jgi.doe.gov/report/protein/Hvulgare_r1/HORVU3Hr1G117680.39	HORVU3Hr1G117680.39	H.vulgare r1	1.16e-88	39	471	+/+	seq.submitted 2021-10-26T21:37:39.415Z UTC	419	880	2	439	293.508	182	269	42	925	490
	phytozome-next.jgi.doe.gov/report/protein/Hvulgare_r1/HORVU3Hr1G117680.27	HORVU3Hr1G117680.27	H.vulgare r1	1.16e-88	39	471	+/+	seq.submitted 2021-10-26T21:37:39.415Z UTC	419	880	2	439	293.508	182	269	42	925	490
	phytozome-next.jgi.doe.gov/report/protein/Hvulgare_r1/HORVU3Hr1G117680.9	HORVU3Hr1G117680.9	H.vulgare r1	1.16e-88	39	471	+/+	seq.submitted 2021-10-26T21:37:39.415Z UTC	419	880	2	439	293.508	182	269	42	925	490
	phytozome-next.jgi.doe.gov/report/protein/Hvulgare_r1/HORVU3Hr1G117680.1	HORVU3Hr1G117680.1	H.vulgare r1	1.16e-88	39	471	+/+	seq.submitted 2021-10-26T21:37:39.415Z UTC	419	880	2	439	293.508	182	269	42	925	490
	phytozome-next.jgi.doe.gov/report/protein/Hvulgare_r1/HORVU3Hr1G117680.7	HORVU3Hr1G117680.7	H.vulgare r1	1.16e-88	39	471	+/+	seq.submitted 2021-10-26T21:37:39.415Z UTC	419	880	2	439	293.508	182	269	42	925	490
	phytozome-next.jgi.doe.gov/report/protein/Hvulgare_r1/HORVU3Hr1G117680.5	HORVU3Hr1G117680.5	H.vulgare r1	1.16e-88	39	471	+/+	seq.submitted 2021-10-26T21:37:39.415Z UTC	419	880	2	439	293.508	182	269	42	925	490
	phytozome-next.jgi.doe.gov/report/protein/Hvulgare_r1/HORVU3Hr1G117680.28	HORVU3Hr1G117680.28	H.vulgare r1	2.71e-88	39	481	+/+	seq.submitted 2021-10-26T21:37:39.415Z UTC	409	880	173	644	298.901	189	280	18	925	695
	phytozome-next.jgi.doe.gov/report/protein/Hvulgare_r1/HORVU5Hr1G041590.38	HORVU5Hr1G041590.38	H.vulgare r1	8.61e-87	29	843	+/+	seq.submitted 2021-10-26T21:37:39.415Z UTC	79	875	86	875	299.671	248	393	99	925	903
	phytozome-next.jgi.doe.gov/report/protein/Hvulgare_r1/HORVU7Hr1G029800.4	HORVU7Hr1G029800.4	H.vulgare r1	8.45e-84	33	688	+/+	seq.submitted 2021-10-26T21:37:39.415Z UTC	231	895	7	667	286.574	225	350	50	925	704
	phytozome-next.jgi.doe.gov/report/protein/Hvulgare_r1/HORVU5Hr1G021690.8	HORVU5Hr1G021690.8	H.vulgare r1	2.82e-83	34	540	+/+	seq.submitted 2021-10-26T21:37:39.415Z UTC	357	875	6	503	281.182	185	269	63	925	562
	phytozome-next.jgi.doe.gov/report/protein/Hvulgare_r1/HORVU2Hr1G058820.16	HORVU2Hr1G058820.16	H.vulgare r1	5.5e-83	77	163	+/+	seq.submitted 2021-10-26T21:37:39.415Z UTC	734	894	1	163	268.085	125	142	2	925	206
	phytozome-next.jgi.doe.gov/report/protein/Hvulgare_r1/HORVU2Hr1G058820.17	HORVU2Hr1G058820.17	H.vulgare r1	5.5e-83	77	163	+/+	seq.submitted 2021-10-26T21:37:39.415Z UTC	734	894	1	163	268.085	125	142	2	925	206
	phytozome-next.jgi.doe.gov/report/protein/Hvulgare_r1/HORVU3Hr1G117680.11	HORVU3Hr1G117680.11	H.vulgare r1	1.03e-82	33	729	+/+	seq.submitted 2021-10-26T21:37:39.415Z UTC	83	769	112	811	286.574	243	354	71	925	819
	phytozome-next.jgi.doe.gov/report/protein/Hvulgare_r1/HORVU3Hr1G117680.15	HORVU3Hr1G117680.15	H.vulgare r1	1.24e-82	33	729	+/+	seq.submitted 2021-10-26T21:37:39.415Z UTC	83	769	108	807	286.574	243	354	71	925	822
	phytozome-next.jgi.doe.gov/report/protein/Hvulgare_r1/HORVU3Hr1G117680.13	HORVU3Hr1G117680.13	H.vulgare r1	1.24e-82	33	729	+/+	seq.submitted 2021-10-26T21:37:39.415Z UTC	83	769	112	811	286.574	243	354	71	925	826
	phytozome-next.jgi.doe.gov/report/protein/Hvulgare_r1/HORVU5Hr1G021690.4	HORVU5Hr1G021690.4	H.vulgare r1	2.05e-82	35	514	+/+	seq.submitted 2021-10-26T21:37:39.415Z UTC	383	875	25	503	278.87	180	260	56	925	562
	phytozome-next.jgi.doe.gov/report/protein/Hvulgare_r1/HORVU1Hr1G004790.9	HORVU1Hr1G004790.9	H.vulgare r1	4.03e-82	29	868	+/+	seq.submitted 2021-10-26T21:37:39.415Z UTC	78	892	77	879	286.96	255	397	118	925	916
	phytozome-next.jgi.doe.gov/report/protein/Hvulgare_r1/HORVU5Hr1G096860.1	HORVU5Hr1G096860.1	H.vulgare r1	1.69e-78	47	292	+/+	seq.submitted 2021-10-26T21:37:39.415Z UTC	586	875	478	768	274.633	137	196	3	925	809
	phytozome-next.jgi.doe.gov/report/protein/Hvulgare_r1/HORVU6Hr1G022360.7	HORVU6Hr1G022360.7	H.vulgare r1	1.89e-78	34	528	+/+	seq.submitted 2021-10-26T21:37:39.415Z UTC	377	887	26	512	267.7	177	267	58	925	543
	phytozome-next.jgi.doe.gov/report/protein/Hvulgare_r1/HORVU5Hr1G096860.3	HORVU5Hr1G096860.3	H.vulgare r1	2.67e-78	47	292	+/+	seq.submitted 2021-10-26T21:37:39.415Z UTC	586	875	512	802	274.633	137	196	3	925	843
	phytozome-next.jgi.doe.gov/report/protein/Hvulgare_r1/HORVU5Hr1G096860.2	HORVU5Hr1G096860.2	H.vulgare r1	3.67e-78	47	292	+/+	seq.submitted 2021-10-26T21:37:39.415Z UTC	586	875	529	819	274.633	137	196	3	925	860
	phytozome-next.jgi.doe.gov/report/protein/Hvulgare_r1/HORVU5Hr1G021690.11	HORVU5Hr1G021690.11	H.vulgare r1	1.78e-76	45	292	+/+	seq.submitted 2021-10-26T21:37:39.415Z UTC	584	875	22	313	256.914	130	181	0	925	372
	phytozome-next.jgi.doe.gov/report/protein/Hvulgare_r1/HORVU5Hr1G021690.9	HORVU5Hr1G021690.9	H.vulgare r1	2.23e-76	45	292	+/+	seq.submitted 2021-10-26T21:37:39.415Z UTC	584	875	22	313	256.529	130	181	0	925	372
	phytozome-next.jgi.doe.gov/report/protein/Hvulgare_r1/HORVU5Hr1G021690.7	HORVU5Hr1G021690.7	H.vulgare r1	2.23e-76	45	292	+/+	seq.submitted 2021-10-26T21:37:39.415Z UTC	584	875	22	313	256.529	130	181	0	925	372
	phytozome-next.jgi.doe.gov/report/protein/Hvulgare_r1/HORVU5Hr1G048950.13	HORVU5Hr1G048950.13	H.vulgare r1	4.91e-76	32	725	+/+	seq.submitted 2021-10-26T21:37:39.415Z UTC	83	769	71	745	266.544	232	337	88	925	751
	phytozome-next.jgi.doe.gov/report/protein/Hvulgare_r1/HORVU5Hr1G021690.15	HORVU5Hr1G021690.15	H.vulgare r1	5.31e-76	45	292	+/+	seq.submitted 2021-10-26T21:37:39.415Z UTC	584	875	78	369	257.299	130	181	0	925	428
	phytozome-next.jgi.doe.gov/report/protein/Hvulgare_r1/HORVU5Hr1G021690.6	HORVU5Hr1G021690.6	H.vulgare r1	6.02e-76	44	292	+/+	seq.submitted 2021-10-26T21:37:39.415Z UTC	584	875	22	313	255.373	129	181	0	925	372
	phytozome-next.jgi.doe.gov/report/protein/Hvulgare_r1/HORVU5Hr1G021690.14	HORVU5Hr1G021690.14	H.vulgare r1	6.64e-76	45	292	+/+	seq.submitted 2021-10-26T21:37:39.415Z UTC	584	875	78	369	257.299	130	181	0	925	428
	phytozome-next.jgi.doe.gov/report/protein/Hvulgare_r1/HORVU4Hr1G051120.42	HORVU4Hr1G051120.42	H.vulgare r1	1.28e-75	45	298	+/+	seq.submitted 2021-10-26T21:37:39.415Z UTC	586	876	16	306	254.218	135	188	14	925	365
	phytozome-next.jgi.doe.gov/report/protein/Hvulgare_r1/HORVU7Hr1G081590.5	HORVU7Hr1G081590.5	H.vulgare r1	4.42e-75	44	305	+/+	seq.submitted 2021-10-26T21:37:39.415Z UTC	586	888	499	801	266.159	133	195	4	925	856
	phytozome-next.jgi.doe.gov/report/protein/Hvulgare_r1/HORVU7Hr1G047570.4	HORVU7Hr1G047570.4	H.vulgare r1	4.46e-75	46	284	+/+	seq.submitted 2021-10-26T21:37:39.415Z UTC	584	861	53	333	252.292	132	187	9	925	349
	phytozome-next.jgi.doe.gov/report/protein/Hvulgare_r1/HORVU7Hr1G081590.3	HORVU7Hr1G081590.3	H.vulgare r1	4.82e-75	44	305	+/+	seq.submitted 2021-10-26T21:37:39.415Z UTC	586	888	485	787	265.774	133	195	4	925	842
	phytozome-next.jgi.doe.gov/report/protein/Hvulgare_r1/HORVU7Hr1G081590.4	HORVU7Hr1G081590.4	H.vulgare r1	4.82e-75	44	305	+/+	seq.submitted 2021-10-26T21:37:39.415Z UTC	586	888	485	787	265.774	133	195	4	925	842
	phytozome-next.jgi.doe.gov/report/protein/Hvulgare_r1/HORVU7Hr1G081590.6	HORVU7Hr1G081590.6	H.vulgare r1	5.18e-75	44	305	+/+	seq.submitted 2021-10-26T21:37:39.415Z UTC	586	888	499	801	265.774	133	195	4	925	856
	phytozome-next.jgi.doe.gov/report/protein/Hvulgare_r1/HORVU7Hr1G081590.1	HORVU7Hr1G081590.1	H.vulgare r1	7.96e-75	44	305	+/+	seq.submitted 2021-10-26T21:37:39.415Z UTC	586	888	500	802	265.388	133	195	4	925	857
	phytozome-next.jgi.doe.gov/report/protein/Hvulgare_r1/HORVU2Hr1G070690.4	HORVU2Hr1G070690.4	H.vulgare r1	2.65e-74	43	328	+/+	seq.submitted 2021-10-26T21:37:39.415Z UTC	581	903	15	339	251.906	140	196	8	925	405
	phytozome-next.jgi.doe.gov/report/protein/Hvulgare_r1/HORVU2Hr1G070690.9	HORVU2Hr1G070690.9	H.vulgare r1	2.65e-74	43	328	+/+	seq.submitted 2021-10-26T21:37:39.415Z UTC	581	903	15	339	251.906	140	196	8	925	405
	phytozome-next.jgi.doe.gov/report/protein/Hvulgare_r1/HORVU2Hr1G070690.3	HORVU2Hr1G070690.3	H.vulgare r1	5.29e-74	43	328	+/+	seq.submitted 2021-10-26T21:37:39.415Z UTC	581	903	29	353	251.521	140	196	8	925	419
	phytozome-next.jgi.doe.gov/report/protein/Hvulgare_r1/HORVU1Hr1G058100.8	HORVU1Hr1G058100.8	H.vulgare r1	8.61e-74	44	308	+/+	seq.submitted 2021-10-26T21:37:39.415Z UTC	570	868	22	329	251.521	134	190	9	925	435
	phytozome-next.jgi.doe.gov/report/protein/Hvulgare_r1/HORVU2Hr1G038950.1	HORVU2Hr1G038950.1	H.vulgare r1	8.71e-74	40	368	+/+	seq.submitted 2021-10-26T21:37:39.415Z UTC	515	875	417	781	261.922	147	215	10	925	834
	phytozome-next.jgi.doe.gov/report/protein/Hvulgare_r1/HORVU2Hr1G038950.1	HORVU2Hr1G038950.1	H.vulgare r1	0.0194	37	93	+/+	seq.submitted 2021-10-26T21:37:39.415Z UTC	228	313	259	350	41.5874	34	43	8	925	834
	phytozome-next.jgi.doe.gov/report/protein/Hvulgare_r1/HORVU2Hr1G038950.8	HORVU2Hr1G038950.8	H.vulgare r1	8.71e-74	40	368	+/+	seq.submitted 2021-10-26T21:37:39.415Z UTC	515	875	417	781	261.922	147	215	10	925	834
	phytozome-next.jgi.doe.gov/report/protein/Hvulgare_r1/HORVU2Hr1G038950.8	HORVU2Hr1G038950.8	H.vulgare r1	0.0194	37	93	+/+	seq.submitted 2021-10-26T21:37:39.415Z UTC	228	313	259	350	41.5874	34	43	8	925	834
	phytozome-next.jgi.doe.gov/report/protein/Hvulgare_r1/HORVU2Hr1G038950.2	HORVU2Hr1G038950.2	H.vulgare r1	8.71e-74	40	368	+/+	seq.submitted 2021-10-26T21:37:39.415Z UTC	515	875	417	781	261.922	147	215	10	925	834
	phytozome-next.jgi.doe.gov/report/protein/Hvulgare_r1/HORVU2Hr1G038950.2	HORVU2Hr1G038950.2	H.vulgare r1	0.0194	37	93	+/+	seq.submitted 2021-10-26T21:37:39.415Z UTC	228	313	259	350	41.5874	34	43	8	925	834
	phytozome-next.jgi.doe.gov/report/protein/Hvulgare_r1/HORVU2Hr1G038950.3	HORVU2Hr1G038950.3	H.vulgare r1	8.71e-74	40	368	+/+	seq.submitted 2021-10-26T21:37:39.415Z UTC	515	875	417	781	261.922	147	215	10	925	834
	phytozome-next.jgi.doe.gov/report/protein/Hvulgare_r1/HORVU2Hr1G038950.3	HORVU2Hr1G038950.3	H.vulgare r1	0.0194	37	93	+/+	seq.submitted 2021-10-26T21:37:39.415Z UTC	228	313	259	350	41.5874	34	43	8	925	834
	phytozome-next.jgi.doe.gov/report/protein/Hvulgare_r1/HORVU2Hr1G038950.4	HORVU2Hr1G038950.4	H.vulgare r1	8.71e-74	40	368	+/+	seq.submitted 2021-10-26T21:37:39.415Z UTC	515	875	417	781	261.922	147	215	10	925	834
	Paralogs	Protein/splice variant	Species	E-value	% identity	Align len	Strands	Query ID	Query from	Query to	Target from	Target to	Bitscore
	1	HORVU1Hr1G078280.4	H.vulgare r1	3.32e-101	30	951	+/+	seq.submitted 2021-10-26T21:37:39.415Z UTC	2	880	1	899	340.117
	2	HORVU1Hr1G078300.6	H.vulgare r1	1.31e-100	30	875	+/+	seq.submitted 2021-10-26T21:37:39.415Z UTC	61	875	68	896	337.421
	3	HORVU2Hr1G058820.10	H.vulgare r1	0	53	549	+/+	seq.submitted 2021-10-26T21:37:39.415Z UTC	362	901	47	565	558.91
		HORVU2Hr1G058820.11	H.vulgare r1	0	54	549	+/+	seq.submitted 2021-10-26T21:37:39.415Z UTC	362	901	47	565	564.303
		HORVU2Hr1G058820.12	H.vulgare r1	0	53	549	+/+	seq.submitted 2021-10-26T21:37:39.415Z UTC	362	901	47	565	561.607
		HORVU2Hr1G058820.15	H.vulgare r1	1.59e-118	47	438	+/+	seq.submitted 2021-10-26T21:37:39.415Z UTC	361	785	43	451	371.318
		HORVU2Hr1G058820.18	H.vulgare r1	3.15e-179	56	497	+/+	seq.submitted 2021-10-26T21:37:39.415Z UTC	413	901	11	477	530.406
		HORVU2Hr1G058820.20	H.vulgare r1	7.6e-122	78	225	+/+	seq.submitted 2021-10-26T21:37:39.415Z UTC	672	894	1	225	372.859
		HORVU2Hr1G058820.21	H.vulgare r1	3.85e-145	50	486	+/+	seq.submitted 2021-10-26T21:37:39.415Z UTC	362	840	48	499	449.129
		HORVU2Hr1G058820.22	H.vulgare r1	0	52	549	+/+	seq.submitted 2021-10-26T21:37:39.415Z UTC	362	901	50	544	540.421
		HORVU2Hr1G058820.23	H.vulgare r1	4.73e-175	60	437	+/+	seq.submitted 2021-10-26T21:37:39.415Z UTC	473	901	1	430	518.079
		HORVU2Hr1G058820.24	H.vulgare r1	1.8e-177	55	498	+/+	seq.submitted 2021-10-26T21:37:39.415Z UTC	413	901	11	478	526.168
		HORVU2Hr1G058820.25	H.vulgare r1	1.67e-112	77	215	+/+	seq.submitted 2021-10-26T21:37:39.415Z UTC	683	894	10	224	348.206
		HORVU2Hr1G058820.26	H.vulgare r1	2.22e-143	49	486	+/+	seq.submitted 2021-10-26T21:37:39.415Z UTC	362	840	44	496	444.506
		HORVU2Hr1G058820.27	H.vulgare r1	0	53	549	+/+	seq.submitted 2021-10-26T21:37:39.415Z UTC	362	901	44	562	562.377
		HORVU2Hr1G058820.28	H.vulgare r1	7.6e-122	78	225	+/+	seq.submitted 2021-10-26T21:37:39.415Z UTC	672	894	1	225	372.859
		HORVU2Hr1G058820.29	H.vulgare r1	0	54	549	+/+	seq.submitted 2021-10-26T21:37:39.415Z UTC	362	901	72	590	565.844
		HORVU2Hr1G058820.3	H.vulgare r1	5.62e-178	60	442	+/+	seq.submitted 2021-10-26T21:37:39.415Z UTC	468	901	18	452	526.554
		HORVU2Hr1G058820.30	H.vulgare r1	0	54	549	+/+	seq.submitted 2021-10-26T21:37:39.415Z UTC	362	901	18	536	565.844
		HORVU2Hr1G058820.31	H.vulgare r1	1.53e-171	64	384	+/+	seq.submitted 2021-10-26T21:37:39.415Z UTC	520	901	25	402	507.294
		HORVU2Hr1G058820.33	H.vulgare r1	5.79e-146	64	332	+/+	seq.submitted 2021-10-26T21:37:39.415Z UTC	520	850	20	346	438.343
		HORVU2Hr1G058820.6	H.vulgare r1	7.6e-122	78	225	+/+	seq.submitted 2021-10-26T21:37:39.415Z UTC	672	894	1	225	372.859
		HORVU2Hr1G058820.9	H.vulgare r1	2.87e-176	60	439	+/+	seq.submitted 2021-10-26T21:37:39.415Z UTC	471	901	1	432	521.161
	4	HORVU3Hr1G117680.2	H.vulgare r1	7.44e-117	34	842	+/+	seq.submitted 2021-10-26T21:37:39.415Z UTC	83	880	110	922	382.874
		HORVU3Hr1G117680.4	H.vulgare r1	8.7e-117	34	842	+/+	seq.submitted 2021-10-26T21:37:39.415Z UTC	83	880	112	924	382.489
		HORVU3Hr1G117680.8	H.vulgare r1	7.44e-117	34	842	+/+	seq.submitted 2021-10-26T21:37:39.415Z UTC	83	880	110	922	382.874
	5	HORVU5Hr1G048950.2	H.vulgare r1	1.73e-111	33	837	+/+	seq.submitted 2021-10-26T21:37:39.415Z UTC	83	875	73	877	367.081

## Sheet: Sorghum
	Views	Protein	Species	E-value	% identity	Align len	Strands	Query ID	Query from	Query to	Target from	Target to	Bitscore	# identical	Positives	Gaps	Query len	Target len
	phytozome-next.jgi.doe.gov/report/protein/Sbicolor_v3_1_1/Sobic.002G343100.1.p	Sobic.002G343100.1.p	S.bicolor v3.1.1	0	56	554	+/+	seq.submitted 2021-10-26T21:38:58.785Z UTC	363	900	28	551	603.594	312	386	46	925	577
	phytozome-next.jgi.doe.gov/report/protein/Sbicolor_v3_1_1/Sobic.002G343100.2.p	Sobic.002G343100.2.p	S.bicolor v3.1.1	0	57	535	+/+	seq.submitted 2021-10-26T21:38:58.785Z UTC	382	900	2	506	591.267	306	373	46	925	532
	phytozome-next.jgi.doe.gov/report/protein/Sbicolor_v3_1_1/Sobic.005G001100.1.p	Sobic.005G001100.1.p	S.bicolor v3.1.1	6.24e-113	33	843	+/+	seq.submitted 2021-10-26T21:38:58.785Z UTC	83	884	79	889	369.777	280	420	73	925	940
	phytozome-next.jgi.doe.gov/report/protein/Sbicolor_v3_1_1/Sobic.008G001300.1.p	Sobic.008G001300.1.p	S.bicolor v3.1.1	3.53e-112	33	841	+/+	seq.submitted 2021-10-26T21:38:58.785Z UTC	84	883	72	880	367.466	278	417	73	925	932
	phytozome-next.jgi.doe.gov/report/protein/Sbicolor_v3_1_1/Sobic.002G177800.2.p	Sobic.002G177800.2.p	S.bicolor v3.1.1	2.7e-110	32	847	+/+	seq.submitted 2021-10-26T21:38:58.785Z UTC	80	875	70	853	360.918	269	408	114	925	883
	phytozome-next.jgi.doe.gov/report/protein/Sbicolor_v3_1_1/Sobic.008G134300.1.p	Sobic.008G134300.1.p	S.bicolor v3.1.1	9.48e-109	33	852	+/+	seq.submitted 2021-10-26T21:38:58.785Z UTC	81	875	91	905	358.992	282	411	94	925	966
	phytozome-next.jgi.doe.gov/report/protein/Sbicolor_v3_1_1/Sobic.008G134300.2.p	Sobic.008G134300.2.p	S.bicolor v3.1.1	1.7e-108	32	851	+/+	seq.submitted 2021-10-26T21:38:58.785Z UTC	81	875	91	881	357.836	273	403	116	925	942
	phytozome-next.jgi.doe.gov/report/protein/Sbicolor_v3_1_1/Sobic.008G001300.2.p	Sobic.008G001300.2.p	S.bicolor v3.1.1	5.76e-107	33	841	+/+	seq.submitted 2021-10-26T21:38:58.785Z UTC	84	883	72	873	353.214	274	413	80	925	925
	phytozome-next.jgi.doe.gov/report/protein/Sbicolor_v3_1_1/Sobic.003G445900.1.p	Sobic.003G445900.1.p	S.bicolor v3.1.1	3.33e-106	32	926	+/+	seq.submitted 2021-10-26T21:38:58.785Z UTC	12	870	29	930	352.829	299	447	91	925	1002
	phytozome-next.jgi.doe.gov/report/protein/Sbicolor_v3_1_1/Sobic.002G178000.1.p	Sobic.002G178000.1.p	S.bicolor v3.1.1	1.22e-102	31	846	+/+	seq.submitted 2021-10-26T21:38:58.785Z UTC	72	875	65	857	340.502	260	411	95	925	887
	phytozome-next.jgi.doe.gov/report/protein/Sbicolor_v3_1_1/Sobic.009G204900.1.p	Sobic.009G204900.1.p	S.bicolor v3.1.1	2e-101	31	841	+/+	seq.submitted 2021-10-26T21:38:58.785Z UTC	82	875	99	897	339.347	262	402	89	925	970
	phytozome-next.jgi.doe.gov/report/protein/Sbicolor_v3_1_1/Sobic.009G204300.1.p	Sobic.009G204300.1.p	S.bicolor v3.1.1	2.27e-98	30	860	+/+	seq.submitted 2021-10-26T21:38:58.785Z UTC	83	875	89	898	330.872	257	406	117	925	964
	phytozome-next.jgi.doe.gov/report/protein/Sbicolor_v3_1_1/Sobic.008G134500.1.p	Sobic.008G134500.1.p	S.bicolor v3.1.1	1.33e-95	30	865	+/+	seq.submitted 2021-10-26T21:38:58.785Z UTC	91	895	71	868	322.398	262	397	127	925	918
	phytozome-next.jgi.doe.gov/report/protein/Sbicolor_v3_1_1/Sobic.002G178101.1.p	Sobic.002G178101.1.p	S.bicolor v3.1.1	2.12e-95	31	829	+/+	seq.submitted 2021-10-26T21:38:58.785Z UTC	81	875	74	859	320.857	256	389	77	925	889
	phytozome-next.jgi.doe.gov/report/protein/Sbicolor_v3_1_1/Sobic.002G178000.2.p	Sobic.002G178000.2.p	S.bicolor v3.1.1	3.19e-95	30	846	+/+	seq.submitted 2021-10-26T21:38:58.785Z UTC	72	875	65	833	320.087	252	395	119	925	863
	phytozome-next.jgi.doe.gov/report/protein/Sbicolor_v3_1_1/Sobic.009G204800.1.p	Sobic.009G204800.1.p	S.bicolor v3.1.1	4.39e-93	29	856	+/+	seq.submitted 2021-10-26T21:38:58.785Z UTC	78	875	81	878	315.849	247	391	116	925	938
	phytozome-next.jgi.doe.gov/report/protein/Sbicolor_v3_1_1/Sobic.009G204800.2.p	Sobic.009G204800.2.p	S.bicolor v3.1.1	4.39e-93	29	856	+/+	seq.submitted 2021-10-26T21:38:58.785Z UTC	78	875	81	878	315.849	247	391	116	925	938
	phytozome-next.jgi.doe.gov/report/protein/Sbicolor_v3_1_1/Sobic.002G177600.2.p	Sobic.002G177600.2.p	S.bicolor v3.1.1	2.1e-88	37	498	+/+	seq.submitted 2021-10-26T21:38:58.785Z UTC	387	875	2	471	291.582	183	268	37	925	505
	phytozome-next.jgi.doe.gov/report/protein/Sbicolor_v3_1_1/Sobic.002G177600.1.p	Sobic.002G177600.1.p	S.bicolor v3.1.1	2.1e-88	37	498	+/+	seq.submitted 2021-10-26T21:38:58.785Z UTC	387	875	2	471	291.582	183	268	37	925	505
	phytozome-next.jgi.doe.gov/report/protein/Sbicolor_v3_1_1/Sobic.009G204700.1.p	Sobic.009G204700.1.p	S.bicolor v3.1.1	3.85e-86	29	883	+/+	seq.submitted 2021-10-26T21:38:58.785Z UTC	28	878	71	908	296.204	257	412	77	925	915
	phytozome-next.jgi.doe.gov/report/protein/Sbicolor_v3_1_1/Sobic.001G082700.1.p	Sobic.001G082700.1.p	S.bicolor v3.1.1	3.39e-81	48	292	+/+	seq.submitted 2021-10-26T21:38:58.785Z UTC	586	875	516	806	281.182	141	197	3	925	846
	phytozome-next.jgi.doe.gov/report/protein/Sbicolor_v3_1_1/Sobic.009G018600.1.p	Sobic.009G018600.1.p	S.bicolor v3.1.1	3.03e-77	40	355	+/+	seq.submitted 2021-10-26T21:38:58.785Z UTC	523	875	427	769	269.24	142	219	14	925	814
	phytozome-next.jgi.doe.gov/report/protein/Sbicolor_v3_1_1/Sobic.009G177400.1.p	Sobic.009G177400.1.p	S.bicolor v3.1.1	6.51e-77	40	399	+/+	seq.submitted 2021-10-26T21:38:58.785Z UTC	513	893	559	945	271.552	159	224	30	925	976
	phytozome-next.jgi.doe.gov/report/protein/Sbicolor_v3_1_1/Sobic.009G055600.1.p	Sobic.009G055600.1.p	S.bicolor v3.1.1	1.48e-76	45	306	+/+	seq.submitted 2021-10-26T21:38:58.785Z UTC	585	888	487	787	268.085	139	198	7	925	836
	phytozome-next.jgi.doe.gov/report/protein/Sbicolor_v3_1_1/Sobic.002G032800.1.p	Sobic.002G032800.1.p	S.bicolor v3.1.1	4.56e-76	42	368	+/+	seq.submitted 2021-10-26T21:38:58.785Z UTC	515	872	423	786	266.929	153	222	14	925	848
	phytozome-next.jgi.doe.gov/report/protein/Sbicolor_v3_1_1/Sobic.006G228700.1.p	Sobic.006G228700.1.p	S.bicolor v3.1.1	4.97e-76	37	407	+/+	seq.submitted 2021-10-26T21:38:58.785Z UTC	486	880	416	810	267.314	152	233	24	925	878
	phytozome-next.jgi.doe.gov/report/protein/Sbicolor_v3_1_1/Sobic.001G525500.1.p	Sobic.001G525500.1.p	S.bicolor v3.1.1	3.65e-75	47	292	+/+	seq.submitted 2021-10-26T21:38:58.785Z UTC	588	875	500	791	264.618	138	185	4	925	858
	phytozome-next.jgi.doe.gov/report/protein/Sbicolor_v3_1_1/Sobic.010G211800.1.p	Sobic.010G211800.1.p	S.bicolor v3.1.1	7.48e-75	39	367	+/+	seq.submitted 2021-10-26T21:38:58.785Z UTC	523	879	416	779	263.462	144	214	13	925	842
	phytozome-next.jgi.doe.gov/report/protein/Sbicolor_v3_1_1/Sobic.006G008900.3.p	Sobic.006G008900.3.p	S.bicolor v3.1.1	2.87e-74	45	300	+/+	seq.submitted 2021-10-26T21:38:58.785Z UTC	585	880	365	660	259.225	136	190	8	925	718
	phytozome-next.jgi.doe.gov/report/protein/Sbicolor_v3_1_1/Sobic.006G008900.1.p	Sobic.006G008900.1.p	S.bicolor v3.1.1	2.87e-74	45	300	+/+	seq.submitted 2021-10-26T21:38:58.785Z UTC	585	880	365	660	259.225	136	190	8	925	718
	phytozome-next.jgi.doe.gov/report/protein/Sbicolor_v3_1_1/Sobic.006G008900.2.p	Sobic.006G008900.2.p	S.bicolor v3.1.1	2.87e-74	45	300	+/+	seq.submitted 2021-10-26T21:38:58.785Z UTC	585	880	365	660	259.225	136	190	8	925	718
	phytozome-next.jgi.doe.gov/report/protein/Sbicolor_v3_1_1/Sobic.006G008900.4.p	Sobic.006G008900.4.p	S.bicolor v3.1.1	2.87e-74	45	300	+/+	seq.submitted 2021-10-26T21:38:58.785Z UTC	585	880	365	660	259.225	136	190	8	925	718
	phytozome-next.jgi.doe.gov/report/protein/Sbicolor_v3_1_1/Sobic.006G054700.1.p	Sobic.006G054700.1.p	S.bicolor v3.1.1	1.84e-73	45	291	+/+	seq.submitted 2021-10-26T21:38:58.785Z UTC	581	868	91	381	250.366	130	185	3	925	485
	phytozome-next.jgi.doe.gov/report/protein/Sbicolor_v3_1_1/Sobic.006G218900.1.p	Sobic.006G218900.1.p	S.bicolor v3.1.1	4.28e-73	37	399	+/+	seq.submitted 2021-10-26T21:38:58.785Z UTC	504	887	414	807	258.455	147	227	20	925	848
	phytozome-next.jgi.doe.gov/report/protein/Sbicolor_v3_1_1/Sobic.006G218900.1.p	Sobic.006G218900.1.p	S.bicolor v3.1.1	0.0339	32	96	+/+	seq.submitted 2021-10-26T21:38:58.785Z UTC	222	308	256	350	38.5058	31	45	10	925	848
	phytozome-next.jgi.doe.gov/report/protein/Sbicolor_v3_1_1/Sobic.010G016100.1.p	Sobic.010G016100.1.p	S.bicolor v3.1.1	4.42e-73	45	298	+/+	seq.submitted 2021-10-26T21:38:58.785Z UTC	586	877	514	810	258.84	134	192	7	925	864
	phytozome-next.jgi.doe.gov/report/protein/Sbicolor_v3_1_1/Sobic.009G117300.1.p	Sobic.009G117300.1.p	S.bicolor v3.1.1	6.76e-73	41	326	+/+	seq.submitted 2021-10-26T21:38:58.785Z UTC	579	892	59	384	248.825	134	195	12	925	475
	phytozome-next.jgi.doe.gov/report/protein/Sbicolor_v3_1_1/Sobic.003G335000.1.p	Sobic.003G335000.1.p	S.bicolor v3.1.1	7.19e-73	41	360	+/+	seq.submitted 2021-10-26T21:38:58.785Z UTC	534	884	559	908	259.61	148	216	19	925	955
	phytozome-next.jgi.doe.gov/report/protein/Sbicolor_v3_1_1/Sobic.003G335000.1.p	Sobic.003G335000.1.p	S.bicolor v3.1.1	5.35e-06	33	94	+/+	seq.submitted 2021-10-26T21:38:58.785Z UTC	351	442	18	99	50.8322	31	55	14	925	955
	phytozome-next.jgi.doe.gov/report/protein/Sbicolor_v3_1_1/Sobic.001G414000.1.p	Sobic.001G414000.1.p	S.bicolor v3.1.1	7.54e-73	47	295	+/+	seq.submitted 2021-10-26T21:38:58.785Z UTC	601	892	533	825	258.07	138	188	5	925	874
	phytozome-next.jgi.doe.gov/report/protein/Sbicolor_v3_1_1/Sobic.009G117400.1.p	Sobic.009G117400.1.p	S.bicolor v3.1.1	8.89e-73	41	326	+/+	seq.submitted 2021-10-26T21:38:58.785Z UTC	579	892	59	384	248.44	134	195	12	925	475
	phytozome-next.jgi.doe.gov/report/protein/Sbicolor_v3_1_1/Sobic.009G011700.1.p	Sobic.009G011700.1.p	S.bicolor v3.1.1	1.43e-72	43	316	+/+	seq.submitted 2021-10-26T21:38:58.785Z UTC	567	869	49	363	245.358	137	196	14	925	406
	phytozome-next.jgi.doe.gov/report/protein/Sbicolor_v3_1_1/Sobic.004G157000.1.p	Sobic.004G157000.1.p	S.bicolor v3.1.1	2.14e-72	45	293	+/+	seq.submitted 2021-10-26T21:38:58.785Z UTC	580	868	97	389	248.44	131	186	4	925	513
	phytozome-next.jgi.doe.gov/report/protein/Sbicolor_v3_1_1/Sobic.001G382400.1.p	Sobic.001G382400.1.p	S.bicolor v3.1.1	2.41e-72	45	298	+/+	seq.submitted 2021-10-26T21:38:58.785Z UTC	586	880	530	825	257.299	134	190	5	925	896
	phytozome-next.jgi.doe.gov/report/protein/Sbicolor_v3_1_1/Sobic.004G252200.2.p	Sobic.004G252200.2.p	S.bicolor v3.1.1	2.57e-72	36	489	+/+	seq.submitted 2021-10-26T21:38:58.785Z UTC	409	884	126	592	251.521	176	261	35	925	627
	phytozome-next.jgi.doe.gov/report/protein/Sbicolor_v3_1_1/Sobic.004G252200.1.p	Sobic.004G252200.1.p	S.bicolor v3.1.1	2.57e-72	36	489	+/+	seq.submitted 2021-10-26T21:38:58.785Z UTC	409	884	126	592	251.521	176	261	35	925	627
	phytozome-next.jgi.doe.gov/report/protein/Sbicolor_v3_1_1/Sobic.010G115300.1.p	Sobic.010G115300.1.p	S.bicolor v3.1.1	2.69e-72	38	493	+/+	seq.submitted 2021-10-26T21:38:58.785Z UTC	409	884	129	595	251.521	188	270	43	925	630
	phytozome-next.jgi.doe.gov/report/protein/Sbicolor_v3_1_1/Sobic.009G026900.1.p	Sobic.009G026900.1.p	S.bicolor v3.1.1	4.64e-72	45	292	+/+	seq.submitted 2021-10-26T21:38:58.785Z UTC	580	868	73	364	245.358	132	181	3	925	448
	phytozome-next.jgi.doe.gov/report/protein/Sbicolor_v3_1_1/Sobic.003G335100.1.p	Sobic.003G335100.1.p	S.bicolor v3.1.1	8.01e-72	42	355	+/+	seq.submitted 2021-10-26T21:38:58.785Z UTC	526	872	560	901	256.144	148	208	21	925	937
	phytozome-next.jgi.doe.gov/report/protein/Sbicolor_v3_1_1/Sobic.003G114700.1.p	Sobic.003G114700.1.p	S.bicolor v3.1.1	1.11e-71	41	352	+/+	seq.submitted 2021-10-26T21:38:58.785Z UTC	527	869	343	687	252.677	145	210	16	925	755
	phytozome-next.jgi.doe.gov/report/protein/Sbicolor_v3_1_1/Sobic.003G100700.1.p	Sobic.003G100700.1.p	S.bicolor v3.1.1	2.6e-71	45	290	+/+	seq.submitted 2021-10-26T21:38:58.785Z UTC	586	869	347	633	250.366	130	188	9	925	700
	phytozome-next.jgi.doe.gov/report/protein/Sbicolor_v3_1_1/Sobic.001G033400.1.p	Sobic.001G033400.1.p	S.bicolor v3.1.1	3.06e-71	43	307	+/+	seq.submitted 2021-10-26T21:38:58.785Z UTC	577	870	57	362	242.276	133	191	14	925	419
	phytozome-next.jgi.doe.gov/report/protein/Sbicolor_v3_1_1/Sobic.006G000600.1.p	Sobic.006G000600.1.p	S.bicolor v3.1.1	6.32e-71	46	299	+/+	seq.submitted 2021-10-26T21:38:58.785Z UTC	578	869	371	661	249.98	137	191	15	925	731
	phytozome-next.jgi.doe.gov/report/protein/Sbicolor_v3_1_1/Sobic.002G082100.1.p	Sobic.002G082100.1.p	S.bicolor v3.1.1	7.38e-71	42	326	+/+	seq.submitted 2021-10-26T21:38:58.785Z UTC	586	903	189	513	244.588	137	199	9	925	522
	phytozome-next.jgi.doe.gov/report/protein/Sbicolor_v3_1_1/Sobic.010G139100.1.p	Sobic.010G139100.1.p	S.bicolor v3.1.1	1.13e-70	48	276	+/+	seq.submitted 2021-10-26T21:38:58.785Z UTC	599	869	386	657	248.825	132	181	9	925	715
	phytozome-next.jgi.doe.gov/report/protein/Sbicolor_v3_1_1/Sobic.010G139100.2.p	Sobic.010G139100.2.p	S.bicolor v3.1.1	1.13e-70	48	276	+/+	seq.submitted 2021-10-26T21:38:58.785Z UTC	599	869	386	657	248.825	132	181	9	925	715
	phytozome-next.jgi.doe.gov/report/protein/Sbicolor_v3_1_1/Sobic.003G114700.2.p	Sobic.003G114700.2.p	S.bicolor v3.1.1	1.31e-70	41	352	+/+	seq.submitted 2021-10-26T21:38:58.785Z UTC	527	869	453	797	251.521	145	210	16	925	865
	phytozome-next.jgi.doe.gov/report/protein/Sbicolor_v3_1_1/Sobic.009G174500.1.p	Sobic.009G174500.1.p	S.bicolor v3.1.1	1.47e-70	45	291	+/+	seq.submitted 2021-10-26T21:38:58.785Z UTC	586	875	601	885	252.677	131	186	7	925	940
	phytozome-next.jgi.doe.gov/report/protein/Sbicolor_v3_1_1/Sobic.004G069200.1.p	Sobic.004G069200.1.p	S.bicolor v3.1.1	1.52e-70	41	293	+/+	seq.submitted 2021-10-26T21:38:58.785Z UTC	579	869	24	315	238.81	121	186	3	925	375
	phytozome-next.jgi.doe.gov/report/protein/Sbicolor_v3_1_1/Sobic.002G409600.1.p	Sobic.002G409600.1.p	S.bicolor v3.1.1	1.67e-70	43	303	+/+	seq.submitted 2021-10-26T21:38:58.785Z UTC	569	868	47	348	241.506	131	186	4	925	461
	phytozome-next.jgi.doe.gov/report/protein/Sbicolor_v3_1_1/Sobic.003G151300.2.p	Sobic.003G151300.2.p	S.bicolor v3.1.1	2.09e-70	45	286	+/+	seq.submitted 2021-10-26T21:38:58.785Z UTC	586	869	179	463	243.047	130	183	3	925	514
	phytozome-next.jgi.doe.gov/report/protein/Sbicolor_v3_1_1/Sobic.003G151300.1.p	Sobic.003G151300.1.p	S.bicolor v3.1.1	2.09e-70	45	286	+/+	seq.submitted 2021-10-26T21:38:58.785Z UTC	586	869	179	463	243.047	130	183	3	925	514
	phytozome-next.jgi.doe.gov/report/protein/Sbicolor_v3_1_1/Sobic.009G082600.1.p	Sobic.009G082600.1.p	S.bicolor v3.1.1	2.78e-70	44	297	+/+	seq.submitted 2021-10-26T21:38:58.785Z UTC	586	876	197	490	244.588	130	195	9	925	583
	phytozome-next.jgi.doe.gov/report/protein/Sbicolor_v3_1_1/Sobic.001G384500.1.p	Sobic.001G384500.1.p	S.bicolor v3.1.1	2.89e-70	45	298	+/+	seq.submitted 2021-10-26T21:38:58.785Z UTC	586	876	635	925	252.292	135	187	14	925	983
	phytozome-next.jgi.doe.gov/report/protein/Sbicolor_v3_1_1/Sobic.001G384500.1.p	Sobic.001G384500.1.p	S.bicolor v3.1.1	4.51e-07	34	95	+/+	seq.submitted 2021-10-26T21:38:58.785Z UTC	350	442	32	116	54.299	32	52	12	925	983
	phytozome-next.jgi.doe.gov/report/protein/Sbicolor_v3_1_1/Sobic.003G010500.1.p	Sobic.003G010500.1.p	S.bicolor v3.1.1	4.34e-70	44	305	+/+	seq.submitted 2021-10-26T21:38:58.785Z UTC	578	876	225	524	244.973	135	194	11	925	621
	phytozome-next.jgi.doe.gov/report/protein/Sbicolor_v3_1_1/Sobic.008G024300.2.p	Sobic.008G024300.2.p	S.bicolor v3.1.1	4.75e-70	45	294	+/+	seq.submitted 2021-10-26T21:38:58.785Z UTC	586	869	57	347	238.424	131	184	13	925	399
	phytozome-next.jgi.doe.gov/report/protein/Sbicolor_v3_1_1/Sobic.009G254000.1.p	Sobic.009G254000.1.p	S.bicolor v3.1.1	6.42e-70	41	326	+/+	seq.submitted 2021-10-26T21:38:58.785Z UTC	586	903	187	511	241.891	135	198	9	925	520
	phytozome-next.jgi.doe.gov/report/protein/Sbicolor_v3_1_1/Sobic.008G024300.1.p	Sobic.008G024300.1.p	S.bicolor v3.1.1	6.77e-70	44	297	+/+	seq.submitted 2021-10-26T21:38:58.785Z UTC	583	869	66	359	238.424	132	185	13	925	411
	phytozome-next.jgi.doe.gov/report/protein/Sbicolor_v3_1_1/Sobic.005G017000.2.p	Sobic.005G017000.2.p	S.bicolor v3.1.1	8.18e-70	45	294	+/+	seq.submitted 2021-10-26T21:38:58.785Z UTC	586	869	54	344	237.654	131	183	13	925	396
	phytozome-next.jgi.doe.gov/report/protein/Sbicolor_v3_1_1/Sobic.006G179500.2.p	Sobic.006G179500.2.p	S.bicolor v3.1.1	1.06e-69	43	307	+/+	seq.submitted 2021-10-26T21:38:58.785Z UTC	577	870	101	406	239.58	131	190	14	925	461
	phytozome-next.jgi.doe.gov/report/protein/Sbicolor_v3_1_1/Sobic.005G017000.1.p	Sobic.005G017000.1.p	S.bicolor v3.1.1	1.22e-69	44	297	+/+	seq.submitted 2021-10-26T21:38:58.785Z UTC	583	869	66	359	237.654	132	184	13	925	411
	phytozome-next.jgi.doe.gov/report/protein/Sbicolor_v3_1_1/Sobic.006G179500.1.p	Sobic.006G179500.1.p	S.bicolor v3.1.1	1.26e-69	43	307	+/+	seq.submitted 2021-10-26T21:38:58.785Z UTC	577	870	102	407	239.195	131	190	14	925	462
	phytozome-next.jgi.doe.gov/report/protein/Sbicolor_v3_1_1/Sobic.004G042600.1.p	Sobic.004G042600.1.p	S.bicolor v3.1.1	1.3e-69	42	292	+/+	seq.submitted 2021-10-26T21:38:58.785Z UTC	584	875	565	854	249.595	124	187	2	925	902
	phytozome-next.jgi.doe.gov/report/protein/Sbicolor_v3_1_1/Sobic.004G042600.1.p	Sobic.004G042600.1.p	S.bicolor v3.1.1	5.08e-25	29	460	+/+	seq.submitted 2021-10-26T21:38:58.785Z UTC	10	442	1	448	112.464	132	204	39	925	902
	phytozome-next.jgi.doe.gov/report/protein/Sbicolor_v3_1_1/Sobic.009G175600.2.p	Sobic.009G175600.2.p	S.bicolor v3.1.1	1.56e-69	38	397	+/+	seq.submitted 2021-10-26T21:38:58.785Z UTC	522	902	554	925	249.98	150	222	41	925	944
	phytozome-next.jgi.doe.gov/report/protein/Sbicolor_v3_1_1/Sobic.009G175600.1.p	Sobic.009G175600.1.p	S.bicolor v3.1.1	1.56e-69	38	397	+/+	seq.submitted 2021-10-26T21:38:58.785Z UTC	522	902	554	925	249.98	150	222	41	925	944
	phytozome-next.jgi.doe.gov/report/protein/Sbicolor_v3_1_1/Sobic.002G140200.1.p	Sobic.002G140200.1.p	S.bicolor v3.1.1	1.81e-69	42	305	+/+	seq.submitted 2021-10-26T21:38:58.785Z UTC	581	880	96	400	237.654	129	182	5	925	427
	phytozome-next.jgi.doe.gov/report/protein/Sbicolor_v3_1_1/Sobic.010G076600.1.p	Sobic.010G076600.1.p	S.bicolor v3.1.1	3.2e-69	43	312	+/+	seq.submitted 2021-10-26T21:38:58.785Z UTC	578	877	60	366	237.654	133	193	17	925	451
	phytozome-next.jgi.doe.gov/report/protein/Sbicolor_v3_1_1/Sobic.002G409600.2.p	Sobic.002G409600.2.p	S.bicolor v3.1.1	3.69e-69	43	303	+/+	seq.submitted 2021-10-26T21:38:58.785Z UTC	569	868	47	345	238.039	129	185	7	925	458
	phytozome-next.jgi.doe.gov/report/protein/Sbicolor_v3_1_1/Sobic.001G236200.1.p	Sobic.001G236200.1.p	S.bicolor v3.1.1	5.16e-69	43	297	+/+	seq.submitted 2021-10-26T21:38:58.785Z UTC	582	865	82	375	236.884	129	184	16	925	442
	phytozome-next.jgi.doe.gov/report/protein/Sbicolor_v3_1_1/Sobic.001G236200.2.p	Sobic.001G236200.2.p	S.bicolor v3.1.1	5.16e-69	43	297	+/+	seq.submitted 2021-10-26T21:38:58.785Z UTC	582	865	82	375	236.884	129	184	16	925	442
	phytozome-next.jgi.doe.gov/report/protein/Sbicolor_v3_1_1/Sobic.009G077300.1.p	Sobic.009G077300.1.p	S.bicolor v3.1.1	6.26e-69	44	293	+/+	seq.submitted 2021-10-26T21:38:58.785Z UTC	582	868	104	396	236.113	130	181	6	925	421
	phytozome-next.jgi.doe.gov/report/protein/Sbicolor_v3_1_1/Sobic.009G079100.1.p	Sobic.009G079100.1.p	S.bicolor v3.1.1	1.6e-68	44	286	+/+	seq.submitted 2021-10-26T21:38:58.785Z UTC	586	869	176	460	238.039	126	182	3	925	516
	phytozome-next.jgi.doe.gov/report/protein/Sbicolor_v3_1_1/Sobic.003G322000.1.p	Sobic.003G322000.1.p	S.bicolor v3.1.1	1.61e-68	42	310	+/+	seq.submitted 2021-10-26T21:38:58.785Z UTC	579	884	112	421	236.113	130	187	4	925	455
	phytozome-next.jgi.doe.gov/report/protein/Sbicolor_v3_1_1/Sobic.004G286000.1.p	Sobic.004G286000.1.p	S.bicolor v3.1.1	1.81e-68	40	351	+/+	seq.submitted 2021-10-26T21:38:58.785Z UTC	574	904	97	432	236.498	140	202	35	925	474
	phytozome-next.jgi.doe.gov/report/protein/Sbicolor_v3_1_1/Sobic.009G091000.1.p	Sobic.009G091000.1.p	S.bicolor v3.1.1	2.59e-68	44	294	+/+	seq.submitted 2021-10-26T21:38:58.785Z UTC	586	876	519	810	245.358	128	189	5	925	871
	phytozome-next.jgi.doe.gov/report/protein/Sbicolor_v3_1_1/Sobic.001G517900.1.p	Sobic.001G517900.1.p	S.bicolor v3.1.1	3.48e-68	43	317	+/+	seq.submitted 2021-10-26T21:38:58.785Z UTC	578	881	63	378	233.032	136	189	14	925	391
	phytozome-next.jgi.doe.gov/report/protein/Sbicolor_v3_1_1/Sobic.009G079300.1.p	Sobic.009G079300.1.p	S.bicolor v3.1.1	6.28e-68	44	299	+/+	seq.submitted 2021-10-26T21:38:58.785Z UTC	582	878	589	883	245.358	133	186	6	925	943
	phytozome-next.jgi.doe.gov/report/protein/Sbicolor_v3_1_1/Sobic.009G079300.2.p	Sobic.009G079300.2.p	S.bicolor v3.1.1	6.51e-68	44	299	+/+	seq.submitted 2021-10-26T21:38:58.785Z UTC	582	878	566	860	244.973	133	186	6	925	920
	phytozome-next.jgi.doe.gov/report/protein/Sbicolor_v3_1_1/Sobic.001G421300.1.p	Sobic.001G421300.1.p	S.bicolor v3.1.1	6.58e-68	41	328	+/+	seq.submitted 2021-10-26T21:38:58.785Z UTC	556	870	40	366	231.876	135	194	14	925	381
	phytozome-next.jgi.doe.gov/report/protein/Sbicolor_v3_1_1/Sobic.003G274300.2.p	Sobic.003G274300.2.p	S.bicolor v3.1.1	7.85e-68	43	303	+/+	seq.submitted 2021-10-26T21:38:58.785Z UTC	582	881	491	790	244.202	131	185	6	925	883
	phytozome-next.jgi.doe.gov/report/protein/Sbicolor_v3_1_1/Sobic.001G316000.1.p	Sobic.001G316000.1.p	S.bicolor v3.1.1	7.86e-68	43	293	+/+	seq.submitted 2021-10-26T21:38:58.785Z UTC	586	876	218	509	236.498	125	185	3	925	533
	phytozome-next.jgi.doe.gov/report/protein/Sbicolor_v3_1_1/Sobic.010G213900.1.p	Sobic.010G213900.1.p	S.bicolor v3.1.1	8.02e-68	39	310	+/+	seq.submitted 2021-10-26T21:38:58.785Z UTC	586	892	31	339	233.417	122	191	4	925	438
	phytozome-next.jgi.doe.gov/report/protein/Sbicolor_v3_1_1/Sobic.006G218700.1.p	Sobic.006G218700.1.p	S.bicolor v3.1.1	9.77e-68	44	289	+/+	seq.submitted 2021-10-26T21:38:58.785Z UTC	582	868	23	310	231.106	127	174	3	925	375
	phytozome-next.jgi.doe.gov/report/protein/Sbicolor_v3_1_1/Sobic.003G230000.2.p	Sobic.003G230000.2.p	S.bicolor v3.1.1	9.82e-68	43	286	+/+	seq.submitted 2021-10-26T21:38:58.785Z UTC	586	869	176	460	235.728	123	179	3	925	512
	phytozome-next.jgi.doe.gov/report/protein/Sbicolor_v3_1_1/Sobic.003G230000.1.p	Sobic.003G230000.1.p	S.bicolor v3.1.1	9.82e-68	43	286	+/+	seq.submitted 2021-10-26T21:38:58.785Z UTC	586	869	176	460	235.728	123	179	3	925	512
	phytozome-next.jgi.doe.gov/report/protein/Sbicolor_v3_1_1/Sobic.007G071100.1.p	Sobic.007G071100.1.p	S.bicolor v3.1.1	1.05e-67	45	285	+/+	seq.submitted 2021-10-26T21:38:58.785Z UTC	583	865	23	306	230.72	127	173	3	925	366
	phytozome-next.jgi.doe.gov/report/protein/Sbicolor_v3_1_1/Sobic.006G142500.2.p	Sobic.006G142500.2.p	S.bicolor v3.1.1	1.1e-67	44	291	+/+	seq.submitted 2021-10-26T21:38:58.785Z UTC	582	869	324	613	240.736	127	185	4	925	732
	phytozome-next.jgi.doe.gov/report/protein/Sbicolor_v3_1_1/Sobic.003G274300.3.p	Sobic.003G274300.3.p	S.bicolor v3.1.1	1.17e-67	43	303	+/+	seq.submitted 2021-10-26T21:38:58.785Z UTC	582	881	535	834	244.202	131	185	6	925	927
	phytozome-next.jgi.doe.gov/report/protein/Sbicolor_v3_1_1/Sobic.006G138500.1.p	Sobic.006G138500.1.p	S.bicolor v3.1.1	1.79e-67	44	287	+/+	seq.submitted 2021-10-26T21:38:58.785Z UTC	586	868	82	366	230.72	125	178	6	925	385
	phytozome-next.jgi.doe.gov/report/protein/Sbicolor_v3_1_1/Sobic.003G117900.1.p	Sobic.003G117900.1.p	S.bicolor v3.1.1	1.82e-67	43	286	+/+	seq.submitted 2021-10-26T21:38:58.785Z UTC	586	868	67	352	233.417	124	175	3	925	461
	phytozome-next.jgi.doe.gov/report/protein/Sbicolor_v3_1_1/Sobic.003G274300.4.p	Sobic.003G274300.4.p	S.bicolor v3.1.1	1.99e-67	43	303	+/+	seq.submitted 2021-10-26T21:38:58.785Z UTC	582	881	545	844	243.817	131	185	6	925	937
	phytozome-next.jgi.doe.gov/report/protein/Sbicolor_v3_1_1/Sobic.009G129700.1.p	Sobic.009G129700.1.p	S.bicolor v3.1.1	2.2e-67	42	294	+/+	seq.submitted 2021-10-26T21:38:58.785Z UTC	579	868	142	435	233.417	124	177	4	925	474
	Paralogs	Protein/splice variant	Species	E-value	% identity	Align len	Strands	Query ID	Query from	Query to	Target from	Target to	Bitscore
	1	Sobic.002G177800.2.p	S.bicolor v3.1.1	2.7e-110	32	847	+/+	seq.submitted 2021-10-26T21:38:58.785Z UTC	80	875	70	853	360.918
	2	Sobic.002G178000.1.p	S.bicolor v3.1.1	1.22e-102	31	846	+/+	seq.submitted 2021-10-26T21:38:58.785Z UTC	72	875	65	857	340.502
	3	Sobic.002G343100.1.p	S.bicolor v3.1.1	0	56	554	+/+	seq.submitted 2021-10-26T21:38:58.785Z UTC	363	900	28	551	603.594
		Sobic.002G343100.2.p	S.bicolor v3.1.1	0	57	535	+/+	seq.submitted 2021-10-26T21:38:58.785Z UTC	382	900	2	506	591.267
	4	Sobic.003G445900.1.p	S.bicolor v3.1.1	3.33e-106	32	926	+/+	seq.submitted 2021-10-26T21:38:58.785Z UTC	12	870	29	930	352.829
	5	Sobic.005G001100.1.p	S.bicolor v3.1.1	6.24e-113	33	843	+/+	seq.submitted 2021-10-26T21:38:58.785Z UTC	83	884	79	889	369.777
	6	Sobic.008G001300.1.p	S.bicolor v3.1.1	3.53e-112	33	841	+/+	seq.submitted 2021-10-26T21:38:58.785Z UTC	84	883	72	880	367.466
		Sobic.008G001300.2.p	S.bicolor v3.1.1	5.76e-107	33	841	+/+	seq.submitted 2021-10-26T21:38:58.785Z UTC	84	883	72	873	353.214
	7	Sobic.008G134300.1.p	S.bicolor v3.1.1	9.48e-109	33	852	+/+	seq.submitted 2021-10-26T21:38:58.785Z UTC	81	875	91	905	358.992
		Sobic.008G134300.2.p	S.bicolor v3.1.1	1.7e-108	32	851	+/+	seq.submitted 2021-10-26T21:38:58.785Z UTC	81	875	91	881	357.836
	8	Sobic.009G204900.1.p	S.bicolor v3.1.1	2e-101	31	841	+/+	seq.submitted 2021-10-26T21:38:58.785Z UTC	82	875	99	897	339.347

## Sheet: Brassica
	Views	Protein	Species	E-value	% identity	Align len	Strands	Query ID	Query from	Query to	Target from	Target to	Bitscore	# identical	Positives	Gaps	Query len	Target len
	phytozome-next.jgi.doe.gov/report/protein/BrapaFPsc_v1_3/Brara.G02729.1.p	Brara.G02729.1.p	B.rapaFPsc v1.3	2.89e-120	33	902	+/+	seq.submitted 2021-10-26T21:40:46.827Z UTC	14	875	8	885	388.652	299	450	64	925	932
	phytozome-next.jgi.doe.gov/report/protein/BrapaFPsc_v1_3/Brara.C01855.1.p	Brara.C01855.1.p	B.rapaFPsc v1.3	1.17e-119	33	921	+/+	seq.submitted 2021-10-26T21:40:46.827Z UTC	1	878	1	890	387.111	305	460	74	925	933
	phytozome-next.jgi.doe.gov/report/protein/BrapaFPsc_v1_3/Brara.C03829.1.p	Brara.C03829.1.p	B.rapaFPsc v1.3	3.31e-112	33	856	+/+	seq.submitted 2021-10-26T21:40:46.827Z UTC	72	896	76	890	366.311	282	442	72	925	898
	phytozome-next.jgi.doe.gov/report/protein/BrapaFPsc_v1_3/Brara.E00792.2.p	Brara.E00792.2.p	B.rapaFPsc v1.3	1.43e-110	32	899	+/+	seq.submitted 2021-10-26T21:40:46.827Z UTC	16	878	7	884	362.844	290	448	57	925	932
	phytozome-next.jgi.doe.gov/report/protein/BrapaFPsc_v1_3/Brara.E00792.1.p	Brara.E00792.1.p	B.rapaFPsc v1.3	1.43e-110	32	899	+/+	seq.submitted 2021-10-26T21:40:46.827Z UTC	16	878	7	884	362.844	290	448	57	925	932
	phytozome-next.jgi.doe.gov/report/protein/BrapaFPsc_v1_3/Brara.F02983.1.p	Brara.F02983.1.p	B.rapaFPsc v1.3	5.49e-110	33	939	+/+	seq.submitted 2021-10-26T21:40:46.827Z UTC	17	875	7	887	360.533	311	456	138	925	900
	phytozome-next.jgi.doe.gov/report/protein/BrapaFPsc_v1_3/Brara.F00226.1.p	Brara.F00226.1.p	B.rapaFPsc v1.3	5.84e-110	32	836	+/+	seq.submitted 2021-10-26T21:40:46.827Z UTC	90	887	87	872	360.147	267	409	88	925	889
	phytozome-next.jgi.doe.gov/report/protein/BrapaFPsc_v1_3/Brara.E01609.1.p	Brara.E01609.1.p	B.rapaFPsc v1.3	1.57e-109	33	817	+/+	seq.submitted 2021-10-26T21:40:46.827Z UTC	92	887	87	864	358.992	271	440	60	925	884
	phytozome-next.jgi.doe.gov/report/protein/BrapaFPsc_v1_3/Brara.F00227.1.p	Brara.F00227.1.p	B.rapaFPsc v1.3	1.47e-105	32	839	+/+	seq.submitted 2021-10-26T21:40:46.827Z UTC	90	888	87	873	348.206	269	421	92	925	886
	phytozome-next.jgi.doe.gov/report/protein/BrapaFPsc_v1_3/Brara.F00228.1.p	Brara.F00228.1.p	B.rapaFPsc v1.3	5.12e-105	32	836	+/+	seq.submitted 2021-10-26T21:40:46.827Z UTC	92	887	87	854	346.665	269	412	108	925	874
	phytozome-next.jgi.doe.gov/report/protein/BrapaFPsc_v1_3/Brara.E01610.1.p	Brara.E01610.1.p	B.rapaFPsc v1.3	5.9e-105	32	852	+/+	seq.submitted 2021-10-26T21:40:46.827Z UTC	90	889	88	872	346.665	273	417	119	925	890
	phytozome-next.jgi.doe.gov/report/protein/BrapaFPsc_v1_3/Brara.B01078.1.p	Brara.B01078.1.p	B.rapaFPsc v1.3	6.66e-105	31	828	+/+	seq.submitted 2021-10-26T21:40:46.827Z UTC	81	876	80	840	345.51	253	413	99	925	849
	phytozome-next.jgi.doe.gov/report/protein/BrapaFPsc_v1_3/Brara.E01607.1.p	Brara.E01607.1.p	B.rapaFPsc v1.3	4.5e-102	32	778	+/+	seq.submitted 2021-10-26T21:40:46.827Z UTC	143	891	26	752	335.88	247	379	80	925	765
	phytozome-next.jgi.doe.gov/report/protein/BrapaFPsc_v1_3/Brara.G01412.1.p	Brara.G01412.1.p	B.rapaFPsc v1.3	6.08e-101	32	831	+/+	seq.submitted 2021-10-26T21:40:46.827Z UTC	92	877	92	865	336.265	268	404	102	925	896
	phytozome-next.jgi.doe.gov/report/protein/BrapaFPsc_v1_3/Brara.E01608.1.p	Brara.E01608.1.p	B.rapaFPsc v1.3	6.34e-101	31	850	+/+	seq.submitted 2021-10-26T21:40:46.827Z UTC	90	891	87	878	335.88	263	407	106	925	891
	phytozome-next.jgi.doe.gov/report/protein/BrapaFPsc_v1_3/Brara.H01043.1.p	Brara.H01043.1.p	B.rapaFPsc v1.3	1.02e-100	30	854	+/+	seq.submitted 2021-10-26T21:40:46.827Z UTC	90	887	91	869	335.495	260	399	131	925	889
	phytozome-next.jgi.doe.gov/report/protein/BrapaFPsc_v1_3/Brara.F01809.1.p	Brara.F01809.1.p	B.rapaFPsc v1.3	2.24e-100	32	851	+/+	seq.submitted 2021-10-26T21:40:46.827Z UTC	92	904	91	867	333.954	269	419	112	925	871
	phytozome-next.jgi.doe.gov/report/protein/BrapaFPsc_v1_3/Brara.A00740.1.p	Brara.A00740.1.p	B.rapaFPsc v1.3	4.32e-98	30	848	+/+	seq.submitted 2021-10-26T21:40:46.827Z UTC	78	873	66	841	327.791	258	423	124	925	872
	phytozome-next.jgi.doe.gov/report/protein/BrapaFPsc_v1_3/Brara.E01605.1.p	Brara.E01605.1.p	B.rapaFPsc v1.3	8.14e-98	30	829	+/+	seq.submitted 2021-10-26T21:40:46.827Z UTC	90	888	87	858	327.02	252	405	87	925	874
	phytozome-next.jgi.doe.gov/report/protein/BrapaFPsc_v1_3/Brara.E01611.1.p	Brara.E01611.1.p	B.rapaFPsc v1.3	7.26e-97	30	913	+/+	seq.submitted 2021-10-26T21:40:46.827Z UTC	12	875	9	862	325.094	278	433	108	925	896
	phytozome-next.jgi.doe.gov/report/protein/BrapaFPsc_v1_3/Brara.I05349.1.p	Brara.I05349.1.p	B.rapaFPsc v1.3	9.18e-97	31	851	+/+	seq.submitted 2021-10-26T21:40:46.827Z UTC	92	888	91	854	324.324	265	404	141	925	870
	phytozome-next.jgi.doe.gov/report/protein/BrapaFPsc_v1_3/Brara.G01154.1.p	Brara.G01154.1.p	B.rapaFPsc v1.3	1.22e-96	31	844	+/+	seq.submitted 2021-10-26T21:40:46.827Z UTC	78	869	76	840	323.939	258	403	131	925	874
	phytozome-next.jgi.doe.gov/report/protein/BrapaFPsc_v1_3/Brara.J01337.1.p	Brara.J01337.1.p	B.rapaFPsc v1.3	1.96e-96	30	854	+/+	seq.submitted 2021-10-26T21:40:46.827Z UTC	92	904	90	850	322.783	259	412	134	925	854
	phytozome-next.jgi.doe.gov/report/protein/BrapaFPsc_v1_3/Brara.C01077.1.p	Brara.C01077.1.p	B.rapaFPsc v1.3	5.78e-96	30	817	+/+	seq.submitted 2021-10-26T21:40:46.827Z UTC	92	873	93	849	322.013	249	400	95	925	879
	phytozome-next.jgi.doe.gov/report/protein/BrapaFPsc_v1_3/Brara.B01079.1.p	Brara.B01079.1.p	B.rapaFPsc v1.3	1.36e-95	32	854	+/+	seq.submitted 2021-10-26T21:40:46.827Z UTC	92	904	91	885	321.242	273	425	100	925	889
	phytozome-next.jgi.doe.gov/report/protein/BrapaFPsc_v1_3/Brara.K00905.1.p	Brara.K00905.1.p	B.rapaFPsc v1.3	1.34e-89	30	840	+/+	seq.submitted 2021-10-26T21:40:46.827Z UTC	82	875	83	852	305.449	250	400	116	925	904
	phytozome-next.jgi.doe.gov/report/protein/BrapaFPsc_v1_3/Brara.D01735.1.p	Brara.D01735.1.p	B.rapaFPsc v1.3	1.54e-88	31	808	+/+	seq.submitted 2021-10-26T21:40:46.827Z UTC	90	877	83	844	301.597	251	402	66	925	874
	phytozome-next.jgi.doe.gov/report/protein/BrapaFPsc_v1_3/Brara.D01737.1.p	Brara.D01737.1.p	B.rapaFPsc v1.3	1.56e-88	31	827	+/+	seq.submitted 2021-10-26T21:40:46.827Z UTC	90	876	89	828	301.597	256	384	127	925	860
	phytozome-next.jgi.doe.gov/report/protein/BrapaFPsc_v1_3/Brara.I05349.2.p	Brara.I05349.2.p	B.rapaFPsc v1.3	5.54e-88	30	851	+/+	seq.submitted 2021-10-26T21:40:46.827Z UTC	92	888	91	835	299.671	257	391	160	925	851
	phytozome-next.jgi.doe.gov/report/protein/BrapaFPsc_v1_3/Brara.G01152.1.p	Brara.G01152.1.p	B.rapaFPsc v1.3	6.62e-87	31	821	+/+	seq.submitted 2021-10-26T21:40:46.827Z UTC	81	872	78	844	297.36	252	411	83	925	876
	phytozome-next.jgi.doe.gov/report/protein/BrapaFPsc_v1_3/Brara.H01043.2.p	Brara.H01043.2.p	B.rapaFPsc v1.3	1.14e-85	30	728	+/+	seq.submitted 2021-10-26T21:40:46.827Z UTC	199	887	8	661	289.271	221	335	113	925	681
	phytozome-next.jgi.doe.gov/report/protein/BrapaFPsc_v1_3/Brara.J00912.1.p	Brara.J00912.1.p	B.rapaFPsc v1.3	2.92e-80	46	304	+/+	seq.submitted 2021-10-26T21:40:46.827Z UTC	586	887	499	800	278.485	141	201	4	925	857
	phytozome-next.jgi.doe.gov/report/protein/BrapaFPsc_v1_3/Brara.C01352.1.p	Brara.C01352.1.p	B.rapaFPsc v1.3	4.14e-80	46	304	+/+	seq.submitted 2021-10-26T21:40:46.827Z UTC	586	887	477	778	277.715	140	201	4	925	834
	phytozome-next.jgi.doe.gov/report/protein/BrapaFPsc_v1_3/Brara.F03880.1.p	Brara.F03880.1.p	B.rapaFPsc v1.3	1.5e-79	46	306	+/+	seq.submitted 2021-10-26T21:40:46.827Z UTC	573	875	488	790	276.944	142	205	6	925	869
	phytozome-next.jgi.doe.gov/report/protein/BrapaFPsc_v1_3/Brara.A00029.1.p	Brara.A00029.1.p	B.rapaFPsc v1.3	2.22e-79	48	292	+/+	seq.submitted 2021-10-26T21:40:46.827Z UTC	586	875	506	794	276.174	140	197	5	925	863
	phytozome-next.jgi.doe.gov/report/protein/BrapaFPsc_v1_3/Brara.H01821.1.p	Brara.H01821.1.p	B.rapaFPsc v1.3	3.89e-79	46	306	+/+	seq.submitted 2021-10-26T21:40:46.827Z UTC	573	875	499	801	275.789	142	205	6	925	880
	phytozome-next.jgi.doe.gov/report/protein/BrapaFPsc_v1_3/Brara.J01340.1.p	Brara.J01340.1.p	B.rapaFPsc v1.3	1.11e-77	42	368	+/+	seq.submitted 2021-10-26T21:40:46.827Z UTC	513	875	399	752	270.781	154	219	19	925	830
	phytozome-next.jgi.doe.gov/report/protein/BrapaFPsc_v1_3/Brara.C02012.1.p	Brara.C02012.1.p	B.rapaFPsc v1.3	3.21e-77	42	370	+/+	seq.submitted 2021-10-26T21:40:46.827Z UTC	512	875	410	764	269.24	154	218	21	925	819
	phytozome-next.jgi.doe.gov/report/protein/BrapaFPsc_v1_3/Brara.A02409.1.p	Brara.A02409.1.p	B.rapaFPsc v1.3	3.47e-77	42	352	+/+	seq.submitted 2021-10-26T21:40:46.827Z UTC	537	875	426	767	270.396	148	211	23	925	871
	phytozome-next.jgi.doe.gov/report/protein/BrapaFPsc_v1_3/Brara.D01267.1.p	Brara.D01267.1.p	B.rapaFPsc v1.3	1.2e-76	44	319	+/+	seq.submitted 2021-10-26T21:40:46.827Z UTC	565	880	475	791	268.47	139	204	5	925	856
	phytozome-next.jgi.doe.gov/report/protein/BrapaFPsc_v1_3/Brara.I00657.1.p	Brara.I00657.1.p	B.rapaFPsc v1.3	1.21e-76	43	343	+/+	seq.submitted 2021-10-26T21:40:46.827Z UTC	548	880	467	808	268.085	146	210	11	925	838
	phytozome-next.jgi.doe.gov/report/protein/BrapaFPsc_v1_3/Brara.F02908.1.p	Brara.F02908.1.p	B.rapaFPsc v1.3	1.73e-76	38	394	+/+	seq.submitted 2021-10-26T21:40:46.827Z UTC	509	890	423	814	268.085	149	230	14	925	860
	phytozome-next.jgi.doe.gov/report/protein/BrapaFPsc_v1_3/Brara.B01083.1.p	Brara.B01083.1.p	B.rapaFPsc v1.3	2.54e-76	37	399	+/+	seq.submitted 2021-10-26T21:40:46.827Z UTC	511	904	43	407	255.758	149	231	39	925	411
	phytozome-next.jgi.doe.gov/report/protein/BrapaFPsc_v1_3/Brara.A02411.1.p	Brara.A02411.1.p	B.rapaFPsc v1.3	6.4e-76	45	300	+/+	seq.submitted 2021-10-26T21:40:46.827Z UTC	572	870	63	358	253.832	136	190	5	925	385
	phytozome-next.jgi.doe.gov/report/protein/BrapaFPsc_v1_3/Brara.B03513.1.p	Brara.B03513.1.p	B.rapaFPsc v1.3	1.08e-75	45	310	+/+	seq.submitted 2021-10-26T21:40:46.827Z UTC	586	892	503	810	265.774	138	198	5	925	855
	phytozome-next.jgi.doe.gov/report/protein/BrapaFPsc_v1_3/Brara.F01811.1.p	Brara.F01811.1.p	B.rapaFPsc v1.3	1.81e-75	48	274	+/+	seq.submitted 2021-10-26T21:40:46.827Z UTC	602	875	494	765	264.618	131	181	2	925	834
	phytozome-next.jgi.doe.gov/report/protein/BrapaFPsc_v1_3/Brara.J01336.1.p	Brara.J01336.1.p	B.rapaFPsc v1.3	1.94e-75	42	321	+/+	seq.submitted 2021-10-26T21:40:46.827Z UTC	584	904	548	865	265.388	135	205	3	925	869
	phytozome-next.jgi.doe.gov/report/protein/BrapaFPsc_v1_3/Brara.J01336.1.p	Brara.J01336.1.p	B.rapaFPsc v1.3	2.14e-17	24	396	+/+	seq.submitted 2021-10-26T21:40:46.827Z UTC	92	441	93	458	87.8113	95	159	76	925	869
	phytozome-next.jgi.doe.gov/report/protein/BrapaFPsc_v1_3/Brara.I02796.1.p	Brara.I02796.1.p	B.rapaFPsc v1.3	3.07e-75	45	291	+/+	seq.submitted 2021-10-26T21:40:46.827Z UTC	584	872	511	799	264.618	131	189	4	925	855
	phytozome-next.jgi.doe.gov/report/protein/BrapaFPsc_v1_3/Brara.I02796.1.p	Brara.I02796.1.p	B.rapaFPsc v1.3	0.0043	29	150	+/+	seq.submitted 2021-10-26T21:40:46.827Z UTC	181	313	220	362	41.2022	43	67	24	925	855
	phytozome-next.jgi.doe.gov/report/protein/BrapaFPsc_v1_3/Brara.E02074.1.p	Brara.E02074.1.p	B.rapaFPsc v1.3	3.55e-75	45	293	+/+	seq.submitted 2021-10-26T21:40:46.827Z UTC	586	876	562	849	264.618	133	190	7	925	864
	phytozome-next.jgi.doe.gov/report/protein/BrapaFPsc_v1_3/Brara.E03241.1.p	Brara.E03241.1.p	B.rapaFPsc v1.3	1.07e-74	43	332	+/+	seq.submitted 2021-10-26T21:40:46.827Z UTC	545	868	23	354	252.292	142	204	8	925	442
	phytozome-next.jgi.doe.gov/report/protein/BrapaFPsc_v1_3/Brara.A02823.2.p	Brara.A02823.2.p	B.rapaFPsc v1.3	3.42e-74	45	295	+/+	seq.submitted 2021-10-26T21:40:46.827Z UTC	580	869	64	358	249.21	133	186	5	925	387
	phytozome-next.jgi.doe.gov/report/protein/BrapaFPsc_v1_3/Brara.A02823.1.p	Brara.A02823.1.p	B.rapaFPsc v1.3	3.42e-74	45	295	+/+	seq.submitted 2021-10-26T21:40:46.827Z UTC	580	869	64	358	249.21	133	186	5	925	387
	phytozome-next.jgi.doe.gov/report/protein/BrapaFPsc_v1_3/Brara.H02320.1.p	Brara.H02320.1.p	B.rapaFPsc v1.3	7.44e-74	44	287	+/+	seq.submitted 2021-10-26T21:40:46.827Z UTC	586	869	62	348	248.054	127	182	3	925	378
	phytozome-next.jgi.doe.gov/report/protein/BrapaFPsc_v1_3/Brara.C03793.1.p	Brara.C03793.1.p	B.rapaFPsc v1.3	1.13e-73	45	295	+/+	seq.submitted 2021-10-26T21:40:46.827Z UTC	580	869	64	358	247.284	134	184	5	925	373
	phytozome-next.jgi.doe.gov/report/protein/BrapaFPsc_v1_3/Brara.A03627.1.p	Brara.A03627.1.p	B.rapaFPsc v1.3	1.29e-73	43	334	+/+	seq.submitted 2021-10-26T21:40:46.827Z UTC	545	868	23	356	249.595	144	202	10	925	444
	phytozome-next.jgi.doe.gov/report/protein/BrapaFPsc_v1_3/Brara.I03794.1.p	Brara.I03794.1.p	B.rapaFPsc v1.3	1.88e-73	45	305	+/+	seq.submitted 2021-10-26T21:40:46.827Z UTC	577	868	38	341	246.899	136	187	14	925	385
	phytozome-next.jgi.doe.gov/report/protein/BrapaFPsc_v1_3/Brara.C03192.1.p	Brara.C03192.1.p	B.rapaFPsc v1.3	2.72e-73	42	332	+/+	seq.submitted 2021-10-26T21:40:46.827Z UTC	545	868	23	354	248.44	140	200	8	925	443
	phytozome-next.jgi.doe.gov/report/protein/BrapaFPsc_v1_3/Brara.B01085.1.p	Brara.B01085.1.p	B.rapaFPsc v1.3	3.04e-73	33	525	+/+	seq.submitted 2021-10-26T21:40:46.827Z UTC	395	904	3	456	248.825	175	267	86	925	460
	phytozome-next.jgi.doe.gov/report/protein/BrapaFPsc_v1_3/Brara.I04044.1.p	Brara.I04044.1.p	B.rapaFPsc v1.3	4.1e-73	40	342	+/+	seq.submitted 2021-10-26T21:40:46.827Z UTC	533	868	27	364	246.514	137	201	10	925	398
	phytozome-next.jgi.doe.gov/report/protein/BrapaFPsc_v1_3/Brara.C04368.1.p	Brara.C04368.1.p	B.rapaFPsc v1.3	1.15e-72	38	395	+/+	seq.submitted 2021-10-26T21:40:46.827Z UTC	515	885	436	824	258.07	149	222	30	925	897
	phytozome-next.jgi.doe.gov/report/protein/BrapaFPsc_v1_3/Brara.A02082.1.p	Brara.A02082.1.p	B.rapaFPsc v1.3	1.21e-72	39	383	+/+	seq.submitted 2021-10-26T21:40:46.827Z UTC	523	885	446	822	257.684	149	219	26	925	897
	phytozome-next.jgi.doe.gov/report/protein/BrapaFPsc_v1_3/Brara.D00396.1.p	Brara.D00396.1.p	B.rapaFPsc v1.3	2.35e-72	44	305	+/+	seq.submitted 2021-10-26T21:40:46.827Z UTC	577	868	39	342	243.047	135	183	14	925	351
	phytozome-next.jgi.doe.gov/report/protein/BrapaFPsc_v1_3/Brara.I01171.1.p	Brara.I01171.1.p	B.rapaFPsc v1.3	2.77e-72	45	293	+/+	seq.submitted 2021-10-26T21:40:46.827Z UTC	580	868	32	324	243.047	132	181	4	925	361
	phytozome-next.jgi.doe.gov/report/protein/BrapaFPsc_v1_3/Brara.J02888.1.p	Brara.J02888.1.p	B.rapaFPsc v1.3	3.11e-72	42	313	+/+	seq.submitted 2021-10-26T21:40:46.827Z UTC	571	870	42	353	243.817	130	198	14	925	391
	phytozome-next.jgi.doe.gov/report/protein/BrapaFPsc_v1_3/Brara.B00474.1.p	Brara.B00474.1.p	B.rapaFPsc v1.3	3.64e-72	44	295	+/+	seq.submitted 2021-10-26T21:40:46.827Z UTC	578	868	68	362	245.743	131	180	4	925	452
	phytozome-next.jgi.doe.gov/report/protein/BrapaFPsc_v1_3/Brara.I05642.1.p	Brara.I05642.1.p	B.rapaFPsc v1.3	4.38e-72	45	291	+/+	seq.submitted 2021-10-26T21:40:46.827Z UTC	586	872	139	428	246.128	131	191	5	925	467
	phytozome-next.jgi.doe.gov/report/protein/BrapaFPsc_v1_3/Brara.B02381.1.p	Brara.B02381.1.p	B.rapaFPsc v1.3	5.3e-72	41	362	+/+	seq.submitted 2021-10-26T21:40:46.827Z UTC	522	878	566	917	257.299	150	217	15	925	977
	phytozome-next.jgi.doe.gov/report/protein/BrapaFPsc_v1_3/Brara.B02381.1.p	Brara.B02381.1.p	B.rapaFPsc v1.3	0.000337	37	70	+/+	seq.submitted 2021-10-26T21:40:46.827Z UTC	374	441	44	108	44.669	26	41	7	925	977
	phytozome-next.jgi.doe.gov/report/protein/BrapaFPsc_v1_3/Brara.D02402.1.p	Brara.D02402.1.p	B.rapaFPsc v1.3	5.42e-72	41	337	+/+	seq.submitted 2021-10-26T21:40:46.827Z UTC	546	869	16	351	243.047	139	196	14	925	382
	phytozome-next.jgi.doe.gov/report/protein/BrapaFPsc_v1_3/Brara.C02832.1.p	Brara.C02832.1.p	B.rapaFPsc v1.3	6.16e-72	40	366	+/+	seq.submitted 2021-10-26T21:40:46.827Z UTC	512	869	301	657	252.677	145	210	17	925	727
	phytozome-next.jgi.doe.gov/report/protein/BrapaFPsc_v1_3/Brara.B01082.1.p	Brara.B01082.1.p	B.rapaFPsc v1.3	6.2e-72	41	317	+/+	seq.submitted 2021-10-26T21:40:46.827Z UTC	586	902	340	653	250.751	131	196	3	925	655
	phytozome-next.jgi.doe.gov/report/protein/BrapaFPsc_v1_3/Brara.B01082.1.p	Brara.B01082.1.p	B.rapaFPsc v1.3	2.43e-10	25	208	+/+	seq.submitted 2021-10-26T21:40:46.827Z UTC	268	441	48	245	64.6994	52	89	44	925	655
	phytozome-next.jgi.doe.gov/report/protein/BrapaFPsc_v1_3/Brara.F01472.1.p	Brara.F01472.1.p	B.rapaFPsc v1.3	6.64e-72	43	290	+/+	seq.submitted 2021-10-26T21:40:46.827Z UTC	583	869	63	352	242.662	125	181	3	925	382
	phytozome-next.jgi.doe.gov/report/protein/BrapaFPsc_v1_3/Brara.C02191.1.p	Brara.C02191.1.p	B.rapaFPsc v1.3	9.05e-72	45	298	+/+	seq.submitted 2021-10-26T21:40:46.827Z UTC	582	869	52	346	243.432	133	188	13	925	409
	phytozome-next.jgi.doe.gov/report/protein/BrapaFPsc_v1_3/Brara.J02114.1.p	Brara.J02114.1.p	B.rapaFPsc v1.3	1.35e-71	44	295	+/+	seq.submitted 2021-10-26T21:40:46.827Z UTC	578	868	65	359	244.202	130	179	4	925	456
	phytozome-next.jgi.doe.gov/report/protein/BrapaFPsc_v1_3/Brara.E02137.1.p	Brara.E02137.1.p	B.rapaFPsc v1.3	1.45e-71	44	296	+/+	seq.submitted 2021-10-26T21:40:46.827Z UTC	579	869	52	347	241.506	131	185	5	925	370
	phytozome-next.jgi.doe.gov/report/protein/BrapaFPsc_v1_3/Brara.I03488.1.p	Brara.I03488.1.p	B.rapaFPsc v1.3	2.01e-71	44	303	+/+	seq.submitted 2021-10-26T21:40:46.827Z UTC	586	885	523	823	254.218	133	190	5	925	896
	phytozome-next.jgi.doe.gov/report/protein/BrapaFPsc_v1_3/Brara.F00602.1.p	Brara.F00602.1.p	B.rapaFPsc v1.3	2.68e-71	45	286	+/+	seq.submitted 2021-10-26T21:40:46.827Z UTC	586	869	136	420	243.432	128	182	3	925	459
	phytozome-next.jgi.doe.gov/report/protein/BrapaFPsc_v1_3/Brara.C00064.1.p	Brara.C00064.1.p	B.rapaFPsc v1.3	2.7e-71	40	324	+/+	seq.submitted 2021-10-26T21:40:46.827Z UTC	570	880	40	362	241.506	129	200	14	925	392
	phytozome-next.jgi.doe.gov/report/protein/BrapaFPsc_v1_3/Brara.H02917.1.p	Brara.H02917.1.p	B.rapaFPsc v1.3	2.89e-71	43	302	+/+	seq.submitted 2021-10-26T21:40:46.827Z UTC	586	887	552	849	253.447	131	196	4	925	868
	phytozome-next.jgi.doe.gov/report/protein/BrapaFPsc_v1_3/Brara.H02917.1.p	Brara.H02917.1.p	B.rapaFPsc v1.3	5.52e-27	28	415	+/+	seq.submitted 2021-10-26T21:40:46.827Z UTC	72	442	72	470	118.627	115	189	60	925	868
	phytozome-next.jgi.doe.gov/report/protein/BrapaFPsc_v1_3/Brara.I04063.2.p	Brara.I04063.2.p	B.rapaFPsc v1.3	3.62e-71	44	286	+/+	seq.submitted 2021-10-26T21:40:46.827Z UTC	586	869	168	452	244.588	126	187	3	925	498
	phytozome-next.jgi.doe.gov/report/protein/BrapaFPsc_v1_3/Brara.I04063.1.p	Brara.I04063.1.p	B.rapaFPsc v1.3	3.62e-71	44	286	+/+	seq.submitted 2021-10-26T21:40:46.827Z UTC	586	869	168	452	244.588	126	187	3	925	498
	phytozome-next.jgi.doe.gov/report/protein/BrapaFPsc_v1_3/Brara.G03432.1.p	Brara.G03432.1.p	B.rapaFPsc v1.3	4.07e-71	42	290	+/+	seq.submitted 2021-10-26T21:40:46.827Z UTC	583	869	62	351	240.736	122	180	3	925	384
	phytozome-next.jgi.doe.gov/report/protein/BrapaFPsc_v1_3/Brara.G02187.1.p	Brara.G02187.1.p	B.rapaFPsc v1.3	1.07e-70	43	289	+/+	seq.submitted 2021-10-26T21:40:46.827Z UTC	584	869	61	349	239.58	125	180	3	925	382
	phytozome-next.jgi.doe.gov/report/protein/BrapaFPsc_v1_3/Brara.G01449.1.p	Brara.G01449.1.p	B.rapaFPsc v1.3	1.32e-70	45	312	+/+	seq.submitted 2021-10-26T21:40:46.827Z UTC	586	888	509	815	251.521	139	197	14	925	874
		Paralogs	Protein/splice variant	Species	E-value	% identity	Align len	Strands	Query ID	Query from	Query to	Target from	Target to	Bitscore
		1	Brara.B01078.1.p	B.rapaFPsc v1.3	6.66e-105	31	828	+/+	seq.submitted 2021-10-26T21:40:46.827Z UTC	81	876	80	840	345.51
		2	Brara.C01855.1.p	B.rapaFPsc v1.3	1.17e-119	33	921	+/+	seq.submitted 2021-10-26T21:40:46.827Z UTC	1	878	1	890	387.111
		3	Brara.C03829.1.p	B.rapaFPsc v1.3	3.31e-112	33	856	+/+	seq.submitted 2021-10-26T21:40:46.827Z UTC	72	896	76	890	366.311
		4	Brara.E00792.1.p	B.rapaFPsc v1.3	1.43e-110	32	899	+/+	seq.submitted 2021-10-26T21:40:46.827Z UTC	16	878	7	884	362.844
			Brara.E00792.2.p	B.rapaFPsc v1.3	1.43e-110	32	899	+/+	seq.submitted 2021-10-26T21:40:46.827Z UTC	16	878	7	884	362.844
		5	Brara.E01607.1.p	B.rapaFPsc v1.3	4.5e-102	32	778	+/+	seq.submitted 2021-10-26T21:40:46.827Z UTC	143	891	26	752	335.88
		6	Brara.E01608.1.p	B.rapaFPsc v1.3	6.34e-101	31	850	+/+	seq.submitted 2021-10-26T21:40:46.827Z UTC	90	891	87	878	335.88
		7	Brara.E01609.1.p	B.rapaFPsc v1.3	1.57e-109	33	817	+/+	seq.submitted 2021-10-26T21:40:46.827Z UTC	92	887	87	864	358.992
		8	Brara.E01610.1.p	B.rapaFPsc v1.3	5.9e-105	32	852	+/+	seq.submitted 2021-10-26T21:40:46.827Z UTC	90	889	88	872	346.665
		9	Brara.F00226.1.p	B.rapaFPsc v1.3	5.84e-110	32	836	+/+	seq.submitted 2021-10-26T21:40:46.827Z UTC	90	887	87	872	360.147
		10	Brara.F00227.1.p	B.rapaFPsc v1.3	1.47e-105	32	839	+/+	seq.submitted 2021-10-26T21:40:46.827Z UTC	90	888	87	873	348.206
		11	Brara.F00228.1.p	B.rapaFPsc v1.3	5.12e-105	32	836	+/+	seq.submitted 2021-10-26T21:40:46.827Z UTC	92	887	87	854	346.665
		12	Brara.F01809.1.p	B.rapaFPsc v1.3	2.24e-100	32	851	+/+	seq.submitted 2021-10-26T21:40:46.827Z UTC	92	904	91	867	333.954
		13	Brara.F02983.1.p	B.rapaFPsc v1.3	5.49e-110	33	939	+/+	seq.submitted 2021-10-26T21:40:46.827Z UTC	17	875	7	887	360.533
		14	Brara.G01412.1.p	B.rapaFPsc v1.3	6.08e-101	32	831	+/+	seq.submitted 2021-10-26T21:40:46.827Z UTC	92	877	92	865	336.265
		15	Brara.G02729.1.p	B.rapaFPsc v1.3	2.89e-120	33	902	+/+	seq.submitted 2021-10-26T21:40:46.827Z UTC	14	875	8	885	388.652
		16	Brara.H01043.1.p	B.rapaFPsc v1.3	1.02e-100	30	854	+/+	seq.submitted 2021-10-26T21:40:46.827Z UTC	90	887	91	869	335.495

## Sheet: Beta
	Views	Protein	Species	E-value	% identity	Align len	Strands	Query ID	Query from	Query to	Target from	Target to	Bitscore	# identical	Positives	Gaps	Query len	Target len
	phytozome-next.jgi.doe.gov/report/protein/Bvulgaris_EL10_1_0/EL10Ac7g17341.1	EL10Ac7g17341.1	B.vulgaris EL10_1.0	2.41e-122	34	869	+/+	seq.submitted 2021-10-26T21:42:39.790Z UTC	76	896	78	907	394.045	292	442	87	925	941
	phytozome-next.jgi.doe.gov/report/protein/Bvulgaris_EL10_1_0/EL10As2g23235.1	EL10As2g23235.1	B.vulgaris EL10_1.0	1.28e-119	34	832	+/+	seq.submitted 2021-10-26T21:42:39.790Z UTC	81	875	71	884	386.341	284	423	55	925	930
	phytozome-next.jgi.doe.gov/report/protein/Bvulgaris_EL10_1_0/EL10Ac7g17843.1	EL10Ac7g17843.1	B.vulgaris EL10_1.0	1.49e-112	32	860	+/+	seq.submitted 2021-10-26T21:42:39.790Z UTC	79	871	106	925	367.851	275	423	107	925	941
	phytozome-next.jgi.doe.gov/report/protein/Bvulgaris_EL10_1_0/EL10Ac7g15938.1	EL10Ac7g15938.1	B.vulgaris EL10_1.0	5.82e-83	43	362	+/+	seq.submitted 2021-10-26T21:42:39.790Z UTC	523	875	405	763	284.648	157	222	12	925	829
	phytozome-next.jgi.doe.gov/report/protein/Bvulgaris_EL10_1_0/EL10Ac4g08083.1	EL10Ac4g08083.1	B.vulgaris EL10_1.0	1.83e-77	41	372	+/+	seq.submitted 2021-10-26T21:42:39.790Z UTC	526	879	411	780	271.937	154	222	20	925	972
	phytozome-next.jgi.doe.gov/report/protein/Bvulgaris_EL10_1_0/EL10Ac5g11066.1	EL10Ac5g11066.1	B.vulgaris EL10_1.0	2.61e-77	47	298	+/+	seq.submitted 2021-10-26T21:42:39.790Z UTC	586	880	546	841	270.396	139	194	5	925	896
	phytozome-next.jgi.doe.gov/report/protein/Bvulgaris_EL10_1_0/EL10Ac9g20966.1	EL10Ac9g20966.1	B.vulgaris EL10_1.0	4.98e-77	45	289	+/+	seq.submitted 2021-10-26T21:42:39.790Z UTC	586	868	76	364	256.914	131	189	6	925	407
	phytozome-next.jgi.doe.gov/report/protein/Bvulgaris_EL10_1_0/EL10Ac7g17205.1	EL10Ac7g17205.1	B.vulgaris EL10_1.0	8.63e-77	45	298	+/+	seq.submitted 2021-10-26T21:42:39.790Z UTC	580	875	489	784	268.085	133	194	4	925	846
	phytozome-next.jgi.doe.gov/report/protein/Bvulgaris_EL10_1_0/EL10Ac9g21689.1	EL10Ac9g21689.1	B.vulgaris EL10_1.0	1.18e-76	45	299	+/+	seq.submitted 2021-10-26T21:42:39.790Z UTC	584	880	504	799	268.085	135	201	5	925	864
	phytozome-next.jgi.doe.gov/report/protein/Bvulgaris_EL10_1_0/EL10Ac3g07010.1	EL10Ac3g07010.1	B.vulgaris EL10_1.0	2.86e-76	41	354	+/+	seq.submitted 2021-10-26T21:42:39.790Z UTC	536	875	420	765	266.159	145	214	22	925	827
	phytozome-next.jgi.doe.gov/report/protein/Bvulgaris_EL10_1_0/EL10Ac1g01931.1	EL10Ac1g01931.1	B.vulgaris EL10_1.0	1.17e-75	44	295	+/+	seq.submitted 2021-10-26T21:42:39.790Z UTC	578	869	54	348	251.906	130	188	3	925	374
	phytozome-next.jgi.doe.gov/report/protein/Bvulgaris_EL10_1_0/EL10Ac7g17824.1	EL10Ac7g17824.1	B.vulgaris EL10_1.0	1.71e-75	45	292	+/+	seq.submitted 2021-10-26T21:42:39.790Z UTC	580	868	60	351	253.447	130	185	3	925	424
	phytozome-next.jgi.doe.gov/report/protein/Bvulgaris_EL10_1_0/EL10Ac7g17125.1	EL10Ac7g17125.1	B.vulgaris EL10_1.0	7.93e-74	39	385	+/+	seq.submitted 2021-10-26T21:42:39.790Z UTC	523	888	440	818	260.381	150	218	25	925	882
	phytozome-next.jgi.doe.gov/report/protein/Bvulgaris_EL10_1_0/EL10Ac7g17125.1	EL10Ac7g17125.1	B.vulgaris EL10_1.0	0.015	25	173	+/+	seq.submitted 2021-10-26T21:42:39.790Z UTC	165	307	178	346	38.5058	43	71	34	925	882
	phytozome-next.jgi.doe.gov/report/protein/Bvulgaris_EL10_1_0/EL10Ac2g03489.1	EL10Ac2g03489.1	B.vulgaris EL10_1.0	9.99e-74	45	303	+/+	seq.submitted 2021-10-26T21:42:39.790Z UTC	586	886	518	818	263.848	136	196	4	925	1208
	phytozome-next.jgi.doe.gov/report/protein/Bvulgaris_EL10_1_0/EL10As7g23813.1	EL10As7g23813.1	B.vulgaris EL10_1.0	2.77e-73	46	295	+/+	seq.submitted 2021-10-26T21:42:39.790Z UTC	586	878	604	894	259.996	136	192	6	925	947
	phytozome-next.jgi.doe.gov/report/protein/Bvulgaris_EL10_1_0/EL10As7g23813.1	EL10As7g23813.1	B.vulgaris EL10_1.0	0.000404	43	61	+/+	seq.submitted 2021-10-26T21:42:39.790Z UTC	384	442	45	100	43.8986	26	36	7	925	947
	phytozome-next.jgi.doe.gov/report/protein/Bvulgaris_EL10_1_0/EL10Ac9g21727.1	EL10Ac9g21727.1	B.vulgaris EL10_1.0	3.42e-73	46	286	+/+	seq.submitted 2021-10-26T21:42:39.790Z UTC	586	869	141	425	247.669	131	188	3	925	445
	phytozome-next.jgi.doe.gov/report/protein/Bvulgaris_EL10_1_0/EL10Ac3g05430.1	EL10Ac3g05430.1	B.vulgaris EL10_1.0	3.44e-73	41	382	+/+	seq.submitted 2021-10-26T21:42:39.790Z UTC	503	875	395	769	258.455	156	224	16	925	871
	phytozome-next.jgi.doe.gov/report/protein/Bvulgaris_EL10_1_0/EL10Ac7g17733.1	EL10Ac7g17733.1	B.vulgaris EL10_1.0	3.84e-73	43	316	+/+	seq.submitted 2021-10-26T21:42:39.790Z UTC	580	892	359	670	256.529	135	207	7	925	779
	phytozome-next.jgi.doe.gov/report/protein/Bvulgaris_EL10_1_0/EL10Ac2g03528.1	EL10Ac2g03528.1	B.vulgaris EL10_1.0	1.55e-72	43	306	+/+	seq.submitted 2021-10-26T21:42:39.790Z UTC	580	868	58	363	244.202	132	183	17	925	397
	phytozome-next.jgi.doe.gov/report/protein/Bvulgaris_EL10_1_0/EL10Ac7g16026.1	EL10Ac7g16026.1	B.vulgaris EL10_1.0	1.72e-72	40	335	+/+	seq.submitted 2021-10-26T21:42:39.790Z UTC	549	869	22	355	244.202	134	206	15	925	396
	phytozome-next.jgi.doe.gov/report/protein/Bvulgaris_EL10_1_0/EL10Ac6g13561.1	EL10Ac6g13561.1	B.vulgaris EL10_1.0	1.38e-71	43	314	+/+	seq.submitted 2021-10-26T21:42:39.790Z UTC	580	890	68	378	244.973	135	189	6	925	495
	phytozome-next.jgi.doe.gov/report/protein/Bvulgaris_EL10_1_0/EL10Ac8g20022.1	EL10Ac8g20022.1	B.vulgaris EL10_1.0	4.35e-71	44	292	+/+	seq.submitted 2021-10-26T21:42:39.790Z UTC	582	869	192	483	244.973	128	182	4	925	546
	phytozome-next.jgi.doe.gov/report/protein/Bvulgaris_EL10_1_0/EL10Ac5g11592.1	EL10Ac5g11592.1	B.vulgaris EL10_1.0	6.16e-71	42	312	+/+	seq.submitted 2021-10-26T21:42:39.790Z UTC	571	869	45	355	240.35	130	194	14	925	409
	phytozome-next.jgi.doe.gov/report/protein/Bvulgaris_EL10_1_0/EL10Ac6g13170.1	EL10Ac6g13170.1	B.vulgaris EL10_1.0	7.55e-71	41	330	+/+	seq.submitted 2021-10-26T21:42:39.790Z UTC	571	887	75	400	241.121	135	201	17	925	433
	phytozome-next.jgi.doe.gov/report/protein/Bvulgaris_EL10_1_0/EL10Ac6g13946.1	EL10Ac6g13946.1	B.vulgaris EL10_1.0	1.91e-70	42	319	+/+	seq.submitted 2021-10-26T21:42:39.790Z UTC	586	895	643	954	252.292	133	199	16	925	980
	phytozome-next.jgi.doe.gov/report/protein/Bvulgaris_EL10_1_0/EL10Ac6g13946.1	EL10Ac6g13946.1	B.vulgaris EL10_1.0	0.00284	43	61	+/+	seq.submitted 2021-10-26T21:42:39.790Z UTC	383	442	43	99	41.2022	26	40	5	925	980
	phytozome-next.jgi.doe.gov/report/protein/Bvulgaris_EL10_1_0/EL10Ac3g05580.1	EL10Ac3g05580.1	B.vulgaris EL10_1.0	2.41e-70	42	303	+/+	seq.submitted 2021-10-26T21:42:39.790Z UTC	586	874	575	863	250.751	128	188	28	925	899
	phytozome-next.jgi.doe.gov/report/protein/Bvulgaris_EL10_1_0/EL10Ac3g05580.1	EL10Ac3g05580.1	B.vulgaris EL10_1.0	0.0189	40	60	+/+	seq.submitted 2021-10-26T21:42:39.790Z UTC	384	442	48	103	38.5058	24	38	5	925	899
	phytozome-next.jgi.doe.gov/report/protein/Bvulgaris_EL10_1_0/EL10Ac2g04458.1	EL10Ac2g04458.1	B.vulgaris EL10_1.0	4.86e-70	40	386	+/+	seq.submitted 2021-10-26T21:42:39.790Z UTC	523	880	503	881	250.751	155	220	35	925	962
	phytozome-next.jgi.doe.gov/report/protein/Bvulgaris_EL10_1_0/EL10Ac2g04458.1	EL10Ac2g04458.1	B.vulgaris EL10_1.0	0.0258	55	31	+/+	seq.submitted 2021-10-26T21:42:39.790Z UTC	269	298	321	351	38.1206	17	23	1	925	962
	phytozome-next.jgi.doe.gov/report/protein/Bvulgaris_EL10_1_0/EL10Ac9g21239.1	EL10Ac9g21239.1	B.vulgaris EL10_1.0	1.9e-69	42	306	+/+	seq.submitted 2021-10-26T21:42:39.790Z UTC	574	868	55	359	236.113	128	188	12	925	405
	phytozome-next.jgi.doe.gov/report/protein/Bvulgaris_EL10_1_0/EL10Ac7g17823.1	EL10Ac7g17823.1	B.vulgaris EL10_1.0	2.05e-69	44	284	+/+	seq.submitted 2021-10-26T21:42:39.790Z UTC	586	865	51	334	235.728	126	180	4	925	389
	phytozome-next.jgi.doe.gov/report/protein/Bvulgaris_EL10_1_0/EL10Ac2g02396.1	EL10Ac2g02396.1	B.vulgaris EL10_1.0	2.08e-69	43	308	+/+	seq.submitted 2021-10-26T21:42:39.790Z UTC	583	880	86	390	237.654	133	187	13	925	454
	phytozome-next.jgi.doe.gov/report/protein/Bvulgaris_EL10_1_0/EL10Ac3g06551.1	EL10Ac3g06551.1	B.vulgaris EL10_1.0	2.76e-69	44	298	+/+	seq.submitted 2021-10-26T21:42:39.790Z UTC	575	868	63	360	238.81	130	184	4	925	509
	phytozome-next.jgi.doe.gov/report/protein/Bvulgaris_EL10_1_0/EL10Ac2g04461.1	EL10Ac2g04461.1	B.vulgaris EL10_1.0	2.97e-69	38	401	+/+	seq.submitted 2021-10-26T21:42:39.790Z UTC	504	880	414	812	247.284	151	221	26	925	892
	phytozome-next.jgi.doe.gov/report/protein/Bvulgaris_EL10_1_0/EL10Ac2g04461.1	EL10Ac2g04461.1	B.vulgaris EL10_1.0	0.0434	40	75	+/+	seq.submitted 2021-10-26T21:42:39.790Z UTC	263	333	284	349	37.3502	30	40	13	925	892
	phytozome-next.jgi.doe.gov/report/protein/Bvulgaris_EL10_1_0/EL10As5g23544.1	EL10As5g23544.1	B.vulgaris EL10_1.0	3.08e-69	43	293	+/+	seq.submitted 2021-10-26T21:42:39.790Z UTC	582	869	351	643	244.202	127	188	5	925	711
	phytozome-next.jgi.doe.gov/report/protein/Bvulgaris_EL10_1_0/EL10Ac7g16338.1	EL10Ac7g16338.1	B.vulgaris EL10_1.0	4.77e-69	46	291	+/+	seq.submitted 2021-10-26T21:42:39.790Z UTC	582	869	484	773	246.899	133	187	4	925	888
	phytozome-next.jgi.doe.gov/report/protein/Bvulgaris_EL10_1_0/EL10Ac6g13945.1	EL10Ac6g13945.1	B.vulgaris EL10_1.0	4.87e-69	43	324	+/+	seq.submitted 2021-10-26T21:42:39.790Z UTC	586	891	543	861	246.514	138	202	23	925	870
	phytozome-next.jgi.doe.gov/report/protein/Bvulgaris_EL10_1_0/EL10Ac6g13944.1	EL10Ac6g13944.1	B.vulgaris EL10_1.0	6.27e-69	45	292	+/+	seq.submitted 2021-10-26T21:42:39.790Z UTC	586	869	624	908	247.669	130	191	15	925	960
	phytozome-next.jgi.doe.gov/report/protein/Bvulgaris_EL10_1_0/EL10Ac6g13944.1	EL10Ac6g13944.1	B.vulgaris EL10_1.0	0.000599	34	106	+/+	seq.submitted 2021-10-26T21:42:39.790Z UTC	384	487	52	130	43.1282	36	52	29	925	960
	phytozome-next.jgi.doe.gov/report/protein/Bvulgaris_EL10_1_0/EL10Ac6g14937.1	EL10Ac6g14937.1	B.vulgaris EL10_1.0	6.47e-69	42	328	+/+	seq.submitted 2021-10-26T21:42:39.790Z UTC	586	902	98	416	236.884	137	200	20	925	468
	phytozome-next.jgi.doe.gov/report/protein/Bvulgaris_EL10_1_0/EL10Ac6g15452.1	EL10Ac6g15452.1	B.vulgaris EL10_1.0	1.08e-68	47	268	+/+	seq.submitted 2021-10-26T21:42:39.790Z UTC	600	865	80	347	234.572	125	173	2	925	422
	phytozome-next.jgi.doe.gov/report/protein/Bvulgaris_EL10_1_0/EL10Ac9g22848.1	EL10Ac9g22848.1	B.vulgaris EL10_1.0	1.58e-68	42	286	+/+	seq.submitted 2021-10-26T21:42:39.790Z UTC	586	869	174	458	238.424	121	182	3	925	562
	phytozome-next.jgi.doe.gov/report/protein/Bvulgaris_EL10_1_0/EL10Ac8g19211.1	EL10Ac8g19211.1	B.vulgaris EL10_1.0	1.65e-68	40	326	+/+	seq.submitted 2021-10-26T21:42:39.790Z UTC	582	904	332	654	243.817	129	194	6	925	795
	phytozome-next.jgi.doe.gov/report/protein/Bvulgaris_EL10_1_0/EL10Ac9g21876.1	EL10Ac9g21876.1	B.vulgaris EL10_1.0	1.94e-68	43	286	+/+	seq.submitted 2021-10-26T21:42:39.790Z UTC	586	869	28	312	232.261	122	177	3	925	373
	phytozome-next.jgi.doe.gov/report/protein/Bvulgaris_EL10_1_0/EL10As7g23746.1	EL10As7g23746.1	B.vulgaris EL10_1.0	3.01e-68	43	286	+/+	seq.submitted 2021-10-26T21:42:39.790Z UTC	586	869	167	451	236.113	124	179	3	925	510
	phytozome-next.jgi.doe.gov/report/protein/Bvulgaris_EL10_1_0/EL10Ac2g04459.1	EL10Ac2g04459.1	B.vulgaris EL10_1.0	6.14e-68	44	307	+/+	seq.submitted 2021-10-26T21:42:39.790Z UTC	586	880	514	820	243.817	135	187	12	925	900
	phytozome-next.jgi.doe.gov/report/protein/Bvulgaris_EL10_1_0/EL10Ac9g22018.1	EL10Ac9g22018.1	B.vulgaris EL10_1.0	6.14e-68	42	315	+/+	seq.submitted 2021-10-26T21:42:39.790Z UTC	586	894	173	482	246.128	133	199	11	925	1114
	phytozome-next.jgi.doe.gov/report/protein/Bvulgaris_EL10_1_0/EL10Ac9g22018.1	EL10Ac9g22018.1	B.vulgaris EL10_1.0	1.06e-55	33	424	+/+	seq.submitted 2021-10-26T21:42:39.790Z UTC	486	897	518	901	209.149	141	221	52	925	1114
	phytozome-next.jgi.doe.gov/report/protein/Bvulgaris_EL10_1_0/EL10Ac9g22018.1	EL10Ac9g22018.1	B.vulgaris EL10_1.0	6.56e-44	39	253	+/+	seq.submitted 2021-10-26T21:42:39.790Z UTC	586	832	883	1096	172.555	99	141	45	925	1114
	phytozome-next.jgi.doe.gov/report/protein/Bvulgaris_EL10_1_0/EL10Ac8g18889.1	EL10Ac8g18889.1	B.vulgaris EL10_1.0	6.85e-68	32	592	+/+	seq.submitted 2021-10-26T21:42:39.790Z UTC	356	889	28	591	238.81	189	292	86	925	643
	phytozome-next.jgi.doe.gov/report/protein/Bvulgaris_EL10_1_0/EL10Ac9g21238.1	EL10Ac9g21238.1	B.vulgaris EL10_1.0	8.5e-68	41	290	+/+	seq.submitted 2021-10-26T21:42:39.790Z UTC	583	869	66	355	231.106	118	176	3	925	385
	phytozome-next.jgi.doe.gov/report/protein/Bvulgaris_EL10_1_0/EL10Ac6g13949.1	EL10Ac6g13949.1	B.vulgaris EL10_1.0	1.21e-67	38	389	+/+	seq.submitted 2021-10-26T21:42:39.790Z UTC	513	872	501	877	243.047	147	223	41	925	919
	phytozome-next.jgi.doe.gov/report/protein/Bvulgaris_EL10_1_0/EL10Ac6g13949.1	EL10Ac6g13949.1	B.vulgaris EL10_1.0	0.0113	36	61	+/+	seq.submitted 2021-10-26T21:42:39.790Z UTC	384	442	23	78	39.2762	22	37	7	925	919
	phytozome-next.jgi.doe.gov/report/protein/Bvulgaris_EL10_1_0/EL10Ac2g04775.1	EL10Ac2g04775.1	B.vulgaris EL10_1.0	2.79e-67	39	378	+/+	seq.submitted 2021-10-26T21:42:39.790Z UTC	522	895	654	1015	243.432	149	215	20	925	1031
	phytozome-next.jgi.doe.gov/report/protein/Bvulgaris_EL10_1_0/EL10Ac8g20575.1	EL10Ac8g20575.1	B.vulgaris EL10_1.0	3.15e-67	31	564	+/+	seq.submitted 2021-10-26T21:42:39.790Z UTC	345	869	12	563	236.113	176	283	51	925	615
	phytozome-next.jgi.doe.gov/report/protein/Bvulgaris_EL10_1_0/EL10Ac6g13148.1	EL10Ac6g13148.1	B.vulgaris EL10_1.0	4.63e-67	40	314	+/+	seq.submitted 2021-10-26T21:42:39.790Z UTC	580	879	109	418	232.261	127	193	18	925	485
	phytozome-next.jgi.doe.gov/report/protein/Bvulgaris_EL10_1_0/EL10Ac7g15884.1	EL10Ac7g15884.1	B.vulgaris EL10_1.0	4.64e-67	42	298	+/+	seq.submitted 2021-10-26T21:42:39.790Z UTC	575	868	72	369	229.95	126	176	4	925	419
	phytozome-next.jgi.doe.gov/report/protein/Bvulgaris_EL10_1_0/EL10Ac4g08404.1	EL10Ac4g08404.1	B.vulgaris EL10_1.0	6.35e-67	42	300	+/+	seq.submitted 2021-10-26T21:42:39.790Z UTC	573	869	635	932	242.276	126	191	5	925	1016
	phytozome-next.jgi.doe.gov/report/protein/Bvulgaris_EL10_1_0/EL10Ac4g08404.1	EL10Ac4g08404.1	B.vulgaris EL10_1.0	0.0695	30	138	+/+	seq.submitted 2021-10-26T21:42:39.790Z UTC	227	347	461	589	36.5798	42	65	26	925	1016
	phytozome-next.jgi.doe.gov/report/protein/Bvulgaris_EL10_1_0/EL10Ac4g08398.1	EL10Ac4g08398.1	B.vulgaris EL10_1.0	8.32e-67	43	314	+/+	seq.submitted 2021-10-26T21:42:39.790Z UTC	586	887	422	733	237.654	134	191	14	925	735
	phytozome-next.jgi.doe.gov/report/protein/Bvulgaris_EL10_1_0/EL10Ac8g18484.1	EL10Ac8g18484.1	B.vulgaris EL10_1.0	8.59e-67	43	299	+/+	seq.submitted 2021-10-26T21:42:39.790Z UTC	577	869	309	600	244.202	129	195	13	925	1722
	phytozome-next.jgi.doe.gov/report/protein/Bvulgaris_EL10_1_0/EL10Ac8g18484.1	EL10Ac8g18484.1	B.vulgaris EL10_1.0	1.18e-65	40	339	+/+	seq.submitted 2021-10-26T21:42:39.790Z UTC	569	876	1280	1613	240.736	136	197	36	925	1722
	phytozome-next.jgi.doe.gov/report/protein/Bvulgaris_EL10_1_0/EL10Ac8g18484.1	EL10Ac8g18484.1	B.vulgaris EL10_1.0	1.03e-64	39	335	+/+	seq.submitted 2021-10-26T21:42:39.790Z UTC	549	876	757	1088	238.039	130	202	10	925	1722
	phytozome-next.jgi.doe.gov/report/protein/Bvulgaris_EL10_1_0/EL10Ac8g18712.1	EL10Ac8g18712.1	B.vulgaris EL10_1.0	1.16e-66	43	296	+/+	seq.submitted 2021-10-26T21:42:39.790Z UTC	586	868	87	378	229.565	128	184	17	925	437
	phytozome-next.jgi.doe.gov/report/protein/Bvulgaris_EL10_1_0/EL10Ac1g00370.1	EL10Ac1g00370.1	B.vulgaris EL10_1.0	1.62e-66	43	286	+/+	seq.submitted 2021-10-26T21:42:39.790Z UTC	586	869	184	468	231.876	123	184	3	925	533
	phytozome-next.jgi.doe.gov/report/protein/Bvulgaris_EL10_1_0/EL10Ac2g04624.1	EL10Ac2g04624.1	B.vulgaris EL10_1.0	3.25e-66	43	273	+/+	seq.submitted 2021-10-26T21:42:39.790Z UTC	586	851	300	570	234.187	118	179	9	925	646
	phytozome-next.jgi.doe.gov/report/protein/Bvulgaris_EL10_1_0/EL10Ac6g15731.1	EL10Ac6g15731.1	B.vulgaris EL10_1.0	4.1e-66	42	286	+/+	seq.submitted 2021-10-26T21:42:39.790Z UTC	586	869	150	434	229.18	120	179	3	925	469
	phytozome-next.jgi.doe.gov/report/protein/Bvulgaris_EL10_1_0/EL10Ac6g13630.1	EL10Ac6g13630.1	B.vulgaris EL10_1.0	5.43e-66	41	302	+/+	seq.submitted 2021-10-26T21:42:39.790Z UTC	586	878	50	345	224.942	125	190	15	925	359
	phytozome-next.jgi.doe.gov/report/protein/Bvulgaris_EL10_1_0/EL10Ac6g14166.1	EL10Ac6g14166.1	B.vulgaris EL10_1.0	2.51e-65	41	290	+/+	seq.submitted 2021-10-26T21:42:39.790Z UTC	578	865	29	316	224.557	118	177	4	925	394
	phytozome-next.jgi.doe.gov/report/protein/Bvulgaris_EL10_1_0/EL10Ac5g11878.1	EL10Ac5g11878.1	B.vulgaris EL10_1.0	2.94e-65	44	277	+/+	seq.submitted 2021-10-26T21:42:39.790Z UTC	601	869	107	380	225.328	122	174	11	925	428
	phytozome-next.jgi.doe.gov/report/protein/Bvulgaris_EL10_1_0/EL10Ac6g13710.1	EL10Ac6g13710.1	B.vulgaris EL10_1.0	3.65e-65	32	553	+/+	seq.submitted 2021-10-26T21:42:39.790Z UTC	380	875	47	580	230.335	179	274	76	925	622
	phytozome-next.jgi.doe.gov/report/protein/Bvulgaris_EL10_1_0/EL10Ac4g08399.1	EL10Ac4g08399.1	B.vulgaris EL10_1.0	3.84e-65	42	314	+/+	seq.submitted 2021-10-26T21:42:39.790Z UTC	586	887	595	906	235.728	133	190	14	925	908
	phytozome-next.jgi.doe.gov/report/protein/Bvulgaris_EL10_1_0/EL10Ac8g19866.1	EL10Ac8g19866.1	B.vulgaris EL10_1.0	4.6e-65	40	319	+/+	seq.submitted 2021-10-26T21:42:39.790Z UTC	572	888	614	931	236.113	128	185	3	925	952
	phytozome-next.jgi.doe.gov/report/protein/Bvulgaris_EL10_1_0/EL10Ac6g14551.1	EL10Ac6g14551.1	B.vulgaris EL10_1.0	6.51e-65	45	272	+/+	seq.submitted 2021-10-26T21:42:39.790Z UTC	586	851	418	686	233.417	123	181	9	925	807
	phytozome-next.jgi.doe.gov/report/protein/Bvulgaris_EL10_1_0/EL10Ac6g14589.1	EL10Ac6g14589.1	B.vulgaris EL10_1.0	6.66e-65	33	513	+/+	seq.submitted 2021-10-26T21:42:39.790Z UTC	407	903	147	615	229.95	168	250	60	925	627
	phytozome-next.jgi.doe.gov/report/protein/Bvulgaris_EL10_1_0/EL10Ac4g08306.1	EL10Ac4g08306.1	B.vulgaris EL10_1.0	7.86e-65	42	290	+/+	seq.submitted 2021-10-26T21:42:39.790Z UTC	582	869	20	308	222.631	121	175	3	925	379
	phytozome-next.jgi.doe.gov/report/protein/Bvulgaris_EL10_1_0/EL10Ac7g16419.1	EL10Ac7g16419.1	B.vulgaris EL10_1.0	8.28e-65	43	282	+/+	seq.submitted 2021-10-26T21:42:39.790Z UTC	600	872	81	358	224.942	122	177	13	925	457
	phytozome-next.jgi.doe.gov/report/protein/Bvulgaris_EL10_1_0/EL10Ac4g09329.1	EL10Ac4g09329.1	B.vulgaris EL10_1.0	1.01e-64	42	297	+/+	seq.submitted 2021-10-26T21:42:39.790Z UTC	583	868	123	419	224.557	126	178	11	925	452
	phytozome-next.jgi.doe.gov/report/protein/Bvulgaris_EL10_1_0/EL10Ac4g07999.1	EL10Ac4g07999.1	B.vulgaris EL10_1.0	1.66e-64	41	299	+/+	seq.submitted 2021-10-26T21:42:39.790Z UTC	578	872	96	381	223.402	124	178	17	925	431
	phytozome-next.jgi.doe.gov/report/protein/Bvulgaris_EL10_1_0/EL10Ac5g11596.1	EL10Ac5g11596.1	B.vulgaris EL10_1.0	2.13e-64	41	306	+/+	seq.submitted 2021-10-26T21:42:39.790Z UTC	582	878	102	406	222.631	124	188	10	925	411
	phytozome-next.jgi.doe.gov/report/protein/Bvulgaris_EL10_1_0/EL10Ac8g19933.1	EL10Ac8g19933.1	B.vulgaris EL10_1.0	2.16e-64	38	378	+/+	seq.submitted 2021-10-26T21:42:39.790Z UTC	500	874	248	597	228.794	145	211	31	925	636
	phytozome-next.jgi.doe.gov/report/protein/Bvulgaris_EL10_1_0/EL10Ac4g08541.1	EL10Ac4g08541.1	B.vulgaris EL10_1.0	3e-64	39	307	+/+	seq.submitted 2021-10-26T21:42:39.790Z UTC	571	875	61	366	222.631	121	178	3	925	435
	phytozome-next.jgi.doe.gov/report/protein/Bvulgaris_EL10_1_0/EL10Ac6g15466.1	EL10Ac6g15466.1	B.vulgaris EL10_1.0	4.74e-64	38	335	+/+	seq.submitted 2021-10-26T21:42:39.790Z UTC	577	877	66	399	221.861	128	196	35	925	425
	phytozome-next.jgi.doe.gov/report/protein/Bvulgaris_EL10_1_0/EL10Ac2g03626.1	EL10Ac2g03626.1	B.vulgaris EL10_1.0	5.38e-64	43	298	+/+	seq.submitted 2021-10-26T21:42:39.790Z UTC	582	869	99	393	223.402	127	175	13	925	482
	phytozome-next.jgi.doe.gov/report/protein/Bvulgaris_EL10_1_0/EL10Ac2g04742.1	EL10Ac2g04742.1	B.vulgaris EL10_1.0	6.08e-64	39	324	+/+	seq.submitted 2021-10-26T21:42:39.790Z UTC	577	869	40	362	221.861	127	187	32	925	428
	phytozome-next.jgi.doe.gov/report/protein/Bvulgaris_EL10_1_0/EL10Ac4g08400.1	EL10Ac4g08400.1	B.vulgaris EL10_1.0	1.04e-63	41	302	+/+	seq.submitted 2021-10-26T21:42:39.790Z UTC	580	869	65	358	221.476	124	183	20	925	443
	phytozome-next.jgi.doe.gov/report/protein/Bvulgaris_EL10_1_0/EL10Ac3g06262.1	EL10Ac3g06262.1	B.vulgaris EL10_1.0	1.65e-63	39	310	+/+	seq.submitted 2021-10-26T21:42:39.790Z UTC	586	869	162	470	222.631	122	181	27	925	499
	phytozome-next.jgi.doe.gov/report/protein/Bvulgaris_EL10_1_0/EL10Ac3g06263.1	EL10Ac3g06263.1	B.vulgaris EL10_1.0	2.48e-63	42	298	+/+	seq.submitted 2021-10-26T21:42:39.790Z UTC	582	872	52	348	218.009	125	183	8	925	362
	phytozome-next.jgi.doe.gov/report/protein/Bvulgaris_EL10_1_0/EL10Ac5g12707.1	EL10Ac5g12707.1	B.vulgaris EL10_1.0	2.7e-63	41	309	+/+	seq.submitted 2021-10-26T21:42:39.790Z UTC	571	872	42	349	218.009	127	182	8	925	364
	phytozome-next.jgi.doe.gov/report/protein/Bvulgaris_EL10_1_0/EL10Ac8g18750.1	EL10Ac8g18750.1	B.vulgaris EL10_1.0	4.28e-63	41	298	+/+	seq.submitted 2021-10-26T21:42:39.790Z UTC	591	868	181	476	221.09	122	181	22	925	489
	phytozome-next.jgi.doe.gov/report/protein/Bvulgaris_EL10_1_0/EL10Ac4g10092.1	EL10Ac4g10092.1	B.vulgaris EL10_1.0	4.59e-63	43	312	+/+	seq.submitted 2021-10-26T21:42:39.790Z UTC	572	874	281	590	225.328	135	193	11	925	654
	phytozome-next.jgi.doe.gov/report/protein/Bvulgaris_EL10_1_0/EL10Ac2g04464.1	EL10Ac2g04464.1	B.vulgaris EL10_1.0	4.65e-63	42	319	+/+	seq.submitted 2021-10-26T21:42:39.790Z UTC	584	878	509	827	229.18	135	191	24	925	878
	phytozome-next.jgi.doe.gov/report/protein/Bvulgaris_EL10_1_0/EL10Ac2g04464.1	EL10Ac2g04464.1	B.vulgaris EL10_1.0	0.0123	43	40	+/+	seq.submitted 2021-10-26T21:42:39.790Z UTC	269	307	311	350	38.891	17	28	1	925	878
	phytozome-next.jgi.doe.gov/report/protein/Bvulgaris_EL10_1_0/EL10Ac3g05942.1	EL10Ac3g05942.1	B.vulgaris EL10_1.0	7.26e-63	43	302	+/+	seq.submitted 2021-10-26T21:42:39.790Z UTC	578	874	459	758	228.794	130	194	7	925	877
	phytozome-next.jgi.doe.gov/report/protein/Bvulgaris_EL10_1_0/EL10Ac2g04772.1	EL10Ac2g04772.1	B.vulgaris EL10_1.0	9.09e-63	37	375	+/+	seq.submitted 2021-10-26T21:42:39.790Z UTC	522	894	360	713	226.483	139	214	23	925	746
	phytozome-next.jgi.doe.gov/report/protein/Bvulgaris_EL10_1_0/EL10Ac1g01705.1	EL10Ac1g01705.1	B.vulgaris EL10_1.0	1.43e-62	38	307	+/+	seq.submitted 2021-10-26T21:42:39.790Z UTC	568	869	267	572	223.016	118	189	6	925	621
	phytozome-next.jgi.doe.gov/report/protein/Bvulgaris_EL10_1_0/EL10Ac9g21383.1	EL10Ac9g21383.1	B.vulgaris EL10_1.0	1.77e-62	38	344	+/+	seq.submitted 2021-10-26T21:42:39.790Z UTC	556	882	307	647	224.942	130	197	20	925	719
	phytozome-next.jgi.doe.gov/report/protein/Bvulgaris_EL10_1_0/EL10Ac8g19967.1	EL10Ac8g19967.1	B.vulgaris EL10_1.0	1.81e-62	43	284	+/+	seq.submitted 2021-10-26T21:42:39.790Z UTC	588	869	509	791	227.639	121	168	3	925	888
	phytozome-next.jgi.doe.gov/report/protein/Bvulgaris_EL10_1_0/EL10Ac8g19911.1	EL10Ac8g19911.1	B.vulgaris EL10_1.0	2.27e-62	41	285	+/+	seq.submitted 2021-10-26T21:42:39.790Z UTC	586	868	37	320	215.312	116	170	3	925	369
	phytozome-next.jgi.doe.gov/report/protein/Bvulgaris_EL10_1_0/EL10Ac7g16027.1	EL10Ac7g16027.1	B.vulgaris EL10_1.0	3.26e-62	43	315	+/+	seq.submitted 2021-10-26T21:42:39.790Z UTC	583	880	79	390	217.624	134	186	20	925	456
	phytozome-next.jgi.doe.gov/report/protein/Bvulgaris_EL10_1_0/EL10Ac1g02252.1	EL10Ac1g02252.1	B.vulgaris EL10_1.0	3.33e-62	32	517	+/+	seq.submitted 2021-10-26T21:42:39.790Z UTC	361	869	29	513	224.942	164	256	40	925	751
	phytozome-next.jgi.doe.gov/report/protein/Bvulgaris_EL10_1_0/EL10Ac4g08391.1	EL10Ac4g08391.1	B.vulgaris EL10_1.0	5.28e-62	44	304	+/+	seq.submitted 2021-10-26T21:42:39.790Z UTC	578	870	626	917	227.254	133	189	23	925	975
	phytozome-next.jgi.doe.gov/report/protein/Bvulgaris_EL10_1_0/EL10Ac3g06888.1	EL10Ac3g06888.1	B.vulgaris EL10_1.0	7.16e-62	38	304	+/+	seq.submitted 2021-10-26T21:42:39.790Z UTC	581	876	64	367	214.157	117	185	8	925	376
	phytozome-next.jgi.doe.gov/report/protein/Bvulgaris_EL10_1_0/EL10Ac1g02253.1	EL10Ac1g02253.1	B.vulgaris EL10_1.0	1.45e-61	39	307	+/+	seq.submitted 2021-10-26T21:42:39.790Z UTC	568	869	330	635	221.861	120	187	6	925	684
	phytozome-next.jgi.doe.gov/report/protein/Bvulgaris_EL10_1_0/EL10Ac1g02253.1	EL10Ac1g02253.1	B.vulgaris EL10_1.0	0.0127	34	65	+/+	seq.submitted 2021-10-26T21:42:39.790Z UTC	379	441	115	174	38.891	22	36	7	925	684
	phytozome-next.jgi.doe.gov/report/protein/Bvulgaris_EL10_1_0/EL10Ac4g10391.1	EL10Ac4g10391.1	B.vulgaris EL10_1.0	1.58e-61	41	343	+/+	seq.submitted 2021-10-26T21:42:39.790Z UTC	564	888	36	372	213.386	140	193	24	925	378
	phytozome-next.jgi.doe.gov/report/protein/Bvulgaris_EL10_1_0/EL10Ac9g21577.1	EL10Ac9g21577.1	B.vulgaris EL10_1.0	2.68e-61	41	292	+/+	seq.submitted 2021-10-26T21:42:39.790Z UTC	584	871	322	605	220.705	119	181	12	925	682
	phytozome-next.jgi.doe.gov/report/protein/Bvulgaris_EL10_1_0/EL10Ac2g04230.1	EL10Ac2g04230.1	B.vulgaris EL10_1.0	3.05e-61	37	331	+/+	seq.submitted 2021-10-26T21:42:39.790Z UTC	574	902	478	806	223.402	124	192	4	925	822
	phytozome-next.jgi.doe.gov/report/protein/Bvulgaris_EL10_1_0/EL10Ac2g04078.1	EL10Ac2g04078.1	B.vulgaris EL10_1.0	5e-61	40	296	+/+	seq.submitted 2021-10-26T21:42:39.790Z UTC	586	874	444	737	222.631	118	188	9	925	814
	phytozome-next.jgi.doe.gov/report/protein/Bvulgaris_EL10_1_0/EL10Ac7g15779.1	EL10Ac7g15779.1	B.vulgaris EL10_1.0	5.59e-61	40	295	+/+	seq.submitted 2021-10-26T21:42:39.790Z UTC	586	877	366	657	220.705	118	183	6	925	721
	phytozome-next.jgi.doe.gov/report/protein/Bvulgaris_EL10_1_0/EL10Ac6g15120.1	EL10Ac6g15120.1	B.vulgaris EL10_1.0	5.79e-61	32	485	+/+	seq.submitted 2021-10-26T21:42:39.790Z UTC	407	869	110	558	218.394	155	239	58	925	608
		Paralogs	Protein/splice variant	Species	E-value	% identity	Align len	Strands	Query ID	Query from	Query to	Target from	Target to	Bitscore
		none	EL10Ac7g17341.1	B.vulgaris EL10_1.0	2.41e-122	34	869	+/+	seq.submitted 2021-10-26T21:42:39.790Z UTC	76	896	78	907	394.045
			EL10As2g23235.1	B.vulgaris EL10_1.0	1.28e-119	34	832	+/+	seq.submitted 2021-10-26T21:42:39.790Z UTC	81	875	71	884	386.341
			EL10Ac7g17843.1	B.vulgaris EL10_1.0	1.49e-112	32	860	+/+	seq.submitted 2021-10-26T21:42:39.790Z UTC	79	871	106	925	367.851

[truncated: 2 more sheets: S. lycopersicum, S. tuberosum]
