# Supplementary material for: Glycine max Homologs of DOESN'T MAKE INFECTIONS 1, 2, and 3 Function to Impair Heterodera glycines Parasitism While Also Regulating Mitogen Activated Protein Kinase Expression
Source: Front Plant Sci. 2022 May 4;13:842597. doi: 10.3389/fpls.2022.842597 (PMC9114929; doi:10.3389/fpls.2022.842597)
Supplement: Supplementary Table 6 — DMI3 homologs that exist in agriculturally important crops (Tilman et al., 2011; Ray et al., 2013, 2019). Values not in parentheses have a Blast of e-0. Numbers in parentheses have a Blast cutoff of > e-0. Please refer to Materials and Methods subsections: G. max DMI gene identification, and Proteome mining, for details. [file Table_6.xlsx]

## Sheet: Glycine
	Views	Protein	Species	E-value	% identity	Align len	Strands	Query ID	Query from	Query to	Target from	Target to	Bitscore	# identical	Positives	Gaps	Query len	Target len
	phytozome-next.jgi.doe.gov/report/protein/Gmax_Wm82_a2_v1/Glyma.15G222300.1.p	Glyma.15G222300.1.p	G.max Wm82.a2.v1	0	87	529	+/+	seq.submitted 2021-10-27T13:56:03.967Z UTC	1	523	1	526	924.85	460	485	9	523	528
	phytozome-next.jgi.doe.gov/report/protein/Gmax_Wm82_a2_v1/Glyma.08G227200.1.p	Glyma.08G227200.1.p	G.max Wm82.a2.v1	0	86	529	+/+	seq.submitted 2021-10-27T13:56:03.967Z UTC	1	523	1	525	917.916	455	483	10	523	527
	phytozome-next.jgi.doe.gov/report/protein/Gmax_Wm82_a2_v1/Glyma.14G222000.2.p	Glyma.14G222000.2.p	G.max Wm82.a2.v1	4.15e-80	37	448	+/+	seq.submitted 2021-10-27T13:56:03.967Z UTC	69	509	94	514	261.151	164	239	34	523	527
	phytozome-next.jgi.doe.gov/report/protein/Gmax_Wm82_a2_v1/Glyma.11G020200.1.p	Glyma.11G020200.1.p	G.max Wm82.a2.v1	1.94e-79	36	416	+/+	seq.submitted 2021-10-27T13:56:03.967Z UTC	97	509	105	493	258.455	150	230	30	523	506
	phytozome-next.jgi.doe.gov/report/protein/Gmax_Wm82_a2_v1/Glyma.01G223200.1.p	Glyma.01G223200.1.p	G.max Wm82.a2.v1	1.51e-78	36	416	+/+	seq.submitted 2021-10-27T13:56:03.967Z UTC	97	509	128	516	256.914	149	229	30	523	529
	phytozome-next.jgi.doe.gov/report/protein/Gmax_Wm82_a2_v1/Glyma.20G070700.1.p	Glyma.20G070700.1.p	G.max Wm82.a2.v1	1.81e-78	37	417	+/+	seq.submitted 2021-10-27T13:56:03.967Z UTC	97	509	166	554	258.07	155	232	32	523	580
	phytozome-next.jgi.doe.gov/report/protein/Gmax_Wm82_a2_v1/Glyma.20G070700.2.p	Glyma.20G070700.2.p	G.max Wm82.a2.v1	1.81e-78	37	417	+/+	seq.submitted 2021-10-27T13:56:03.967Z UTC	97	509	166	554	258.07	155	232	32	523	580
	phytozome-next.jgi.doe.gov/report/protein/Gmax_Wm82_a2_v1/Glyma.10G120300.1.p	Glyma.10G120300.1.p	G.max Wm82.a2.v1	6.24e-78	37	417	+/+	seq.submitted 2021-10-27T13:56:03.967Z UTC	97	509	168	556	256.914	154	232	32	523	582
	phytozome-next.jgi.doe.gov/report/protein/Gmax_Wm82_a2_v1/Glyma.10G120300.2.p	Glyma.10G120300.2.p	G.max Wm82.a2.v1	6.24e-78	37	417	+/+	seq.submitted 2021-10-27T13:56:03.967Z UTC	97	509	168	556	256.914	154	232	32	523	582
	phytozome-next.jgi.doe.gov/report/protein/Gmax_Wm82_a2_v1/Glyma.05G213200.1.p	Glyma.05G213200.1.p	G.max Wm82.a2.v1	1.29e-77	36	417	+/+	seq.submitted 2021-10-27T13:56:03.967Z UTC	97	509	115	504	254.218	150	229	31	523	519
	phytozome-next.jgi.doe.gov/report/protein/Gmax_Wm82_a2_v1/Glyma.14G222000.1.p	Glyma.14G222000.1.p	G.max Wm82.a2.v1	2.36e-76	37	416	+/+	seq.submitted 2021-10-27T13:56:03.967Z UTC	98	509	137	525	251.521	152	224	31	523	538
	phytozome-next.jgi.doe.gov/report/protein/Gmax_Wm82_a2_v1/Glyma.20G175100.1.p	Glyma.20G175100.1.p	G.max Wm82.a2.v1	4.79e-76	37	416	+/+	seq.submitted 2021-10-27T13:56:03.967Z UTC	97	509	74	461	249.21	153	226	31	523	491
	phytozome-next.jgi.doe.gov/report/protein/Gmax_Wm82_a2_v1/Glyma.10G087100.1.p	Glyma.10G087100.1.p	G.max Wm82.a2.v1	5.84e-76	37	420	+/+	seq.submitted 2021-10-27T13:56:03.967Z UTC	97	508	199	586	251.906	155	226	40	523	596
	phytozome-next.jgi.doe.gov/report/protein/Gmax_Wm82_a2_v1/Glyma.10G217000.1.p	Glyma.10G217000.1.p	G.max Wm82.a2.v1	6.36e-76	36	416	+/+	seq.submitted 2021-10-27T13:56:03.967Z UTC	97	509	74	461	249.21	150	223	31	523	493
	phytozome-next.jgi.doe.gov/report/protein/Gmax_Wm82_a2_v1/Glyma.14G035800.1.p	Glyma.14G035800.1.p	G.max Wm82.a2.v1	8.52e-76	34	419	+/+	seq.submitted 2021-10-27T13:56:03.967Z UTC	97	511	124	515	249.595	143	229	31	523	530
	phytozome-next.jgi.doe.gov/report/protein/Gmax_Wm82_a2_v1/Glyma.02G192700.1.p	Glyma.02G192700.1.p	G.max Wm82.a2.v1	3e-75	35	431	+/+	seq.submitted 2021-10-27T13:56:03.967Z UTC	87	509	158	560	249.98	151	239	36	523	588
	phytozome-next.jgi.doe.gov/report/protein/Gmax_Wm82_a2_v1/Glyma.20G041500.1.p	Glyma.20G041500.1.p	G.max Wm82.a2.v1	3.18e-75	34	417	+/+	seq.submitted 2021-10-27T13:56:03.967Z UTC	97	509	138	527	248.825	142	228	31	523	547
	phytozome-next.jgi.doe.gov/report/protein/Gmax_Wm82_a2_v1/Glyma.10G084000.1.p	Glyma.10G084000.1.p	G.max Wm82.a2.v1	5e-75	36	434	+/+	seq.submitted 2021-10-27T13:56:03.967Z UTC	87	512	163	568	249.595	156	241	36	523	593
	phytozome-next.jgi.doe.gov/report/protein/Gmax_Wm82_a2_v1/Glyma.07G232400.1.p	Glyma.07G232400.1.p	G.max Wm82.a2.v1	5.9e-75	34	417	+/+	seq.submitted 2021-10-27T13:56:03.967Z UTC	97	509	135	524	248.054	142	228	31	523	542
	phytozome-next.jgi.doe.gov/report/protein/Gmax_Wm82_a2_v1/Glyma.02G278900.1.p	Glyma.02G278900.1.p	G.max Wm82.a2.v1	4.86e-74	34	419	+/+	seq.submitted 2021-10-27T13:56:03.967Z UTC	97	511	122	513	244.973	141	228	31	523	528
	phytozome-next.jgi.doe.gov/report/protein/Gmax_Wm82_a2_v1/Glyma.08G005600.1.p	Glyma.08G005600.1.p	G.max Wm82.a2.v1	4.69e-73	36	417	+/+	seq.submitted 2021-10-27T13:56:03.967Z UTC	97	509	84	472	241.891	150	224	32	523	509
	phytozome-next.jgi.doe.gov/report/protein/Gmax_Wm82_a2_v1/Glyma.10G216900.1.p	Glyma.10G216900.1.p	G.max Wm82.a2.v1	6.89e-73	35	417	+/+	seq.submitted 2021-10-27T13:56:03.967Z UTC	97	509	71	459	240.736	146	219	32	523	483
	phytozome-next.jgi.doe.gov/report/protein/Gmax_Wm82_a2_v1/Glyma.05G198300.1.p	Glyma.05G198300.1.p	G.max Wm82.a2.v1	2.99e-72	35	417	+/+	seq.submitted 2021-10-27T13:56:03.967Z UTC	97	509	83	471	239.965	148	223	32	523	508
	phytozome-next.jgi.doe.gov/report/protein/Gmax_Wm82_a2_v1/Glyma.19G201400.1.p	Glyma.19G201400.1.p	G.max Wm82.a2.v1	1.46e-71	35	419	+/+	seq.submitted 2021-10-27T13:56:03.967Z UTC	98	512	179	569	240.35	145	225	32	523	594
	phytozome-next.jgi.doe.gov/report/protein/Gmax_Wm82_a2_v1/Glyma.02G291300.1.p	Glyma.02G291300.1.p	G.max Wm82.a2.v1	1e-70	34	424	+/+	seq.submitted 2021-10-27T13:56:03.967Z UTC	97	514	130	524	236.498	146	223	35	523	529
	phytozome-next.jgi.doe.gov/report/protein/Gmax_Wm82_a2_v1/Glyma.18G096500.4.p	Glyma.18G096500.4.p	G.max Wm82.a2.v1	1.83e-70	33	421	+/+	seq.submitted 2021-10-27T13:56:03.967Z UTC	97	514	147	547	236.113	139	224	23	523	552
	phytozome-next.jgi.doe.gov/report/protein/Gmax_Wm82_a2_v1/Glyma.18G096500.2.p	Glyma.18G096500.2.p	G.max Wm82.a2.v1	1.83e-70	33	421	+/+	seq.submitted 2021-10-27T13:56:03.967Z UTC	97	514	147	547	236.113	139	224	23	523	552
	phytozome-next.jgi.doe.gov/report/protein/Gmax_Wm82_a2_v1/Glyma.18G096500.3.p	Glyma.18G096500.3.p	G.max Wm82.a2.v1	1.83e-70	33	421	+/+	seq.submitted 2021-10-27T13:56:03.967Z UTC	97	514	147	547	236.113	139	224	23	523	552
	phytozome-next.jgi.doe.gov/report/protein/Gmax_Wm82_a2_v1/Glyma.18G096500.1.p	Glyma.18G096500.1.p	G.max Wm82.a2.v1	1.83e-70	33	421	+/+	seq.submitted 2021-10-27T13:56:03.967Z UTC	97	514	147	547	236.113	139	224	23	523	552
	phytozome-next.jgi.doe.gov/report/protein/Gmax_Wm82_a2_v1/Glyma.08G316500.2.p	Glyma.08G316500.2.p	G.max Wm82.a2.v1	3.03e-70	33	423	+/+	seq.submitted 2021-10-27T13:56:03.967Z UTC	97	514	147	547	235.728	140	227	27	523	552
	phytozome-next.jgi.doe.gov/report/protein/Gmax_Wm82_a2_v1/Glyma.08G316500.1.p	Glyma.08G316500.1.p	G.max Wm82.a2.v1	3.03e-70	33	423	+/+	seq.submitted 2021-10-27T13:56:03.967Z UTC	97	514	147	547	235.728	140	227	27	523	552
	phytozome-next.jgi.doe.gov/report/protein/Gmax_Wm82_a2_v1/Glyma.14G023500.1.p	Glyma.14G023500.1.p	G.max Wm82.a2.v1	2.22e-69	34	424	+/+	seq.submitted 2021-10-27T13:56:03.967Z UTC	97	514	141	535	233.032	146	220	35	523	540
	phytozome-next.jgi.doe.gov/report/protein/Gmax_Wm82_a2_v1/Glyma.03G204100.1.p	Glyma.03G204100.1.p	G.max Wm82.a2.v1	2.52e-69	34	419	+/+	seq.submitted 2021-10-27T13:56:03.967Z UTC	98	512	176	566	234.187	142	222	32	523	591
	phytozome-next.jgi.doe.gov/report/protein/Gmax_Wm82_a2_v1/Glyma.17G260900.1.p	Glyma.17G260900.1.p	G.max Wm82.a2.v1	4.36e-69	35	417	+/+	seq.submitted 2021-10-27T13:56:03.967Z UTC	98	510	144	533	232.261	144	219	31	523	537
	phytozome-next.jgi.doe.gov/report/protein/Gmax_Wm82_a2_v1/Glyma.17G013800.1.p	Glyma.17G013800.1.p	G.max Wm82.a2.v1	5.45e-69	35	418	+/+	seq.submitted 2021-10-27T13:56:03.967Z UTC	97	508	140	528	231.876	145	223	35	523	539
	phytozome-next.jgi.doe.gov/report/protein/Gmax_Wm82_a2_v1/Glyma.07G260200.1.p	Glyma.07G260200.1.p	G.max Wm82.a2.v1	1.51e-68	35	423	+/+	seq.submitted 2021-10-27T13:56:03.967Z UTC	97	508	131	519	230.72	148	224	45	523	530
	phytozome-next.jgi.doe.gov/report/protein/Gmax_Wm82_a2_v1/Glyma.06G161200.1.p	Glyma.06G161200.1.p	G.max Wm82.a2.v1	2.08e-68	35	417	+/+	seq.submitted 2021-10-27T13:56:03.967Z UTC	97	509	81	469	229.565	148	223	32	523	498
	phytozome-next.jgi.doe.gov/report/protein/Gmax_Wm82_a2_v1/Glyma.06G161200.1.p	Glyma.06G161200.1.p	G.max Wm82.a2.v1	0.0531	47	34	+/+	seq.submitted 2021-10-27T13:56:03.967Z UTC	479	512	333	366	37.7354	16	23	0	523	498
	phytozome-next.jgi.doe.gov/report/protein/Gmax_Wm82_a2_v1/Glyma.07G151000.1.p	Glyma.07G151000.1.p	G.max Wm82.a2.v1	2.95e-68	35	424	+/+	seq.submitted 2021-10-27T13:56:03.967Z UTC	91	508	107	498	229.95	147	234	38	523	534
	phytozome-next.jgi.doe.gov/report/protein/Gmax_Wm82_a2_v1/Glyma.04G204400.1.p	Glyma.04G204400.1.p	G.max Wm82.a2.v1	3.36e-68	35	417	+/+	seq.submitted 2021-10-27T13:56:03.967Z UTC	97	509	80	468	228.794	148	223	32	523	497
	phytozome-next.jgi.doe.gov/report/protein/Gmax_Wm82_a2_v1/Glyma.04G204400.1.p	Glyma.04G204400.1.p	G.max Wm82.a2.v1	0.0526	47	34	+/+	seq.submitted 2021-10-27T13:56:03.967Z UTC	479	512	332	365	37.7354	16	23	0	523	497
	phytozome-next.jgi.doe.gov/report/protein/Gmax_Wm82_a2_v1/Glyma.14G000800.2.p	Glyma.14G000800.2.p	G.max Wm82.a2.v1	3.57e-68	35	424	+/+	seq.submitted 2021-10-27T13:56:03.967Z UTC	97	512	145	536	230.335	148	225	40	523	559
	phytozome-next.jgi.doe.gov/report/protein/Gmax_Wm82_a2_v1/Glyma.14G000800.1.p	Glyma.14G000800.1.p	G.max Wm82.a2.v1	3.57e-68	35	424	+/+	seq.submitted 2021-10-27T13:56:03.967Z UTC	97	512	145	536	230.335	148	225	40	523	559
	phytozome-next.jgi.doe.gov/report/protein/Gmax_Wm82_a2_v1/Glyma.14G000800.3.p	Glyma.14G000800.3.p	G.max Wm82.a2.v1	3.57e-68	35	424	+/+	seq.submitted 2021-10-27T13:56:03.967Z UTC	97	512	145	536	230.335	148	225	40	523	559
	phytozome-next.jgi.doe.gov/report/protein/Gmax_Wm82_a2_v1/Glyma.18G202100.1.p	Glyma.18G202100.1.p	G.max Wm82.a2.v1	5.57e-68	34	423	+/+	seq.submitted 2021-10-27T13:56:03.967Z UTC	91	508	86	477	228.794	142	227	36	523	513
	phytozome-next.jgi.doe.gov/report/protein/Gmax_Wm82_a2_v1/Glyma.02G311800.1.p	Glyma.02G311800.1.p	G.max Wm82.a2.v1	9.95e-68	35	424	+/+	seq.submitted 2021-10-27T13:56:03.967Z UTC	97	512	136	527	229.18	148	225	40	523	550
	phytozome-next.jgi.doe.gov/report/protein/Gmax_Wm82_a2_v1/Glyma.17G261000.1.p	Glyma.17G261000.1.p	G.max Wm82.a2.v1	2.33e-66	33	419	+/+	seq.submitted 2021-10-27T13:56:03.967Z UTC	98	510	124	512	224.557	139	219	36	523	514
	phytozome-next.jgi.doe.gov/report/protein/Gmax_Wm82_a2_v1/Glyma.10G103100.2.p	Glyma.10G103100.2.p	G.max Wm82.a2.v1	3.17e-66	35	422	+/+	seq.submitted 2021-10-27T13:56:03.967Z UTC	91	508	96	487	224.557	146	224	34	523	529
	phytozome-next.jgi.doe.gov/report/protein/Gmax_Wm82_a2_v1/Glyma.10G103100.1.p	Glyma.10G103100.1.p	G.max Wm82.a2.v1	3.17e-66	35	422	+/+	seq.submitted 2021-10-27T13:56:03.967Z UTC	91	508	96	487	224.557	146	224	34	523	529
	phytozome-next.jgi.doe.gov/report/protein/Gmax_Wm82_a2_v1/Glyma.02G182900.2.p	Glyma.02G182900.2.p	G.max Wm82.a2.v1	3.42e-66	34	412	+/+	seq.submitted 2021-10-27T13:56:03.967Z UTC	101	508	3	388	221.476	140	219	30	523	427
	phytozome-next.jgi.doe.gov/report/protein/Gmax_Wm82_a2_v1/Glyma.02G182900.1.p	Glyma.02G182900.1.p	G.max Wm82.a2.v1	6.1e-66	34	415	+/+	seq.submitted 2021-10-27T13:56:03.967Z UTC	98	508	99	487	223.787	141	221	30	523	526
	phytozome-next.jgi.doe.gov/report/protein/Gmax_Wm82_a2_v1/Glyma.19G201400.2.p	Glyma.19G201400.2.p	G.max Wm82.a2.v1	6.64e-65	35	388	+/+	seq.submitted 2021-10-27T13:56:03.967Z UTC	98	479	179	546	221.861	136	207	26	523	561
	phytozome-next.jgi.doe.gov/report/protein/Gmax_Wm82_a2_v1/Glyma.19G201400.2.p	Glyma.19G201400.2.p	G.max Wm82.a2.v1	0.0082	38	69	+/+	seq.submitted 2021-10-27T13:56:03.967Z UTC	441	506	434	493	40.0466	26	40	12	523	561
	phytozome-next.jgi.doe.gov/report/protein/Gmax_Wm82_a2_v1/Glyma.10G217000.2.p	Glyma.10G217000.2.p	G.max Wm82.a2.v1	8.03e-65	41	299	+/+	seq.submitted 2021-10-27T13:56:03.967Z UTC	97	395	74	351	216.468	124	174	21	523	381
	phytozome-next.jgi.doe.gov/report/protein/Gmax_Wm82_a2_v1/Glyma.11G128900.1.p	Glyma.11G128900.1.p	G.max Wm82.a2.v1	1.05e-64	32	434	+/+	seq.submitted 2021-10-27T13:56:03.967Z UTC	83	507	97	505	220.705	139	228	34	523	543
	phytozome-next.jgi.doe.gov/report/protein/Gmax_Wm82_a2_v1/Glyma.04G175300.1.p	Glyma.04G175300.1.p	G.max Wm82.a2.v1	1.69e-64	33	413	+/+	seq.submitted 2021-10-27T13:56:03.967Z UTC	98	508	125	513	220.705	137	217	26	523	557
	phytozome-next.jgi.doe.gov/report/protein/Gmax_Wm82_a2_v1/Glyma.19G140800.1.p	Glyma.19G140800.1.p	G.max Wm82.a2.v1	1.23e-63	33	422	+/+	seq.submitted 2021-10-27T13:56:03.967Z UTC	91	508	107	498	217.624	140	221	34	523	536
	phytozome-next.jgi.doe.gov/report/protein/Gmax_Wm82_a2_v1/Glyma.03G138000.1.p	Glyma.03G138000.1.p	G.max Wm82.a2.v1	6.38e-63	33	422	+/+	seq.submitted 2021-10-27T13:56:03.967Z UTC	91	508	106	497	215.698	139	221	34	523	535
	phytozome-next.jgi.doe.gov/report/protein/Gmax_Wm82_a2_v1/Glyma.05G213200.2.p	Glyma.05G213200.2.p	G.max Wm82.a2.v1	1.98e-62	40	300	+/+	seq.submitted 2021-10-27T13:56:03.967Z UTC	97	395	115	393	211.46	121	174	22	523	427
	phytozome-next.jgi.doe.gov/report/protein/Gmax_Wm82_a2_v1/Glyma.05G030800.1.p	Glyma.05G030800.1.p	G.max Wm82.a2.v1	4.07e-62	33	413	+/+	seq.submitted 2021-10-27T13:56:03.967Z UTC	98	508	108	496	213.772	136	217	26	523	540
	phytozome-next.jgi.doe.gov/report/protein/Gmax_Wm82_a2_v1/Glyma.12G053400.1.p	Glyma.12G053400.1.p	G.max Wm82.a2.v1	6.02e-62	31	436	+/+	seq.submitted 2021-10-27T13:56:03.967Z UTC	82	508	87	497	213.386	136	231	34	523	534
	phytozome-next.jgi.doe.gov/report/protein/Gmax_Wm82_a2_v1/Glyma.10G217000.3.p	Glyma.10G217000.3.p	G.max Wm82.a2.v1	6.11e-62	44	242	+/+	seq.submitted 2021-10-27T13:56:03.967Z UTC	97	338	74	314	207.994	106	152	1	523	347
	phytozome-next.jgi.doe.gov/report/protein/Gmax_Wm82_a2_v1/Glyma.17G096000.1.p	Glyma.17G096000.1.p	G.max Wm82.a2.v1	7.91e-62	33	413	+/+	seq.submitted 2021-10-27T13:56:03.967Z UTC	98	508	110	498	213.001	138	216	26	523	542
	phytozome-next.jgi.doe.gov/report/protein/Gmax_Wm82_a2_v1/Glyma.16G128600.1.p	Glyma.16G128600.1.p	G.max Wm82.a2.v1	8.67e-61	32	422	+/+	seq.submitted 2021-10-27T13:56:03.967Z UTC	97	504	117	504	209.92	137	222	48	523	529
	phytozome-next.jgi.doe.gov/report/protein/Gmax_Wm82_a2_v1/Glyma.06G189600.1.p	Glyma.06G189600.1.p	G.max Wm82.a2.v1	3.15e-60	33	413	+/+	seq.submitted 2021-10-27T13:56:03.967Z UTC	98	508	120	508	209.149	135	215	26	523	552
	phytozome-next.jgi.doe.gov/report/protein/Gmax_Wm82_a2_v1/Glyma.02G048300.1.p	Glyma.02G048300.1.p	G.max Wm82.a2.v1	5.11e-60	30	533	+/+	seq.submitted 2021-10-27T13:56:03.967Z UTC	3	520	59	521	207.994	159	267	85	523	531
	phytozome-next.jgi.doe.gov/report/protein/Gmax_Wm82_a2_v1/Glyma.14G023500.2.p	Glyma.14G023500.2.p	G.max Wm82.a2.v1	9.69e-59	39	306	+/+	seq.submitted 2021-10-27T13:56:03.967Z UTC	97	399	141	424	202.216	119	167	25	523	444
	phytozome-next.jgi.doe.gov/report/protein/Gmax_Wm82_a2_v1/Glyma.03G138000.2.p	Glyma.03G138000.2.p	G.max Wm82.a2.v1	1.42e-58	34	379	+/+	seq.submitted 2021-10-27T13:56:03.967Z UTC	91	465	106	460	203.371	127	199	28	523	498
	phytozome-next.jgi.doe.gov/report/protein/Gmax_Wm82_a2_v1/Glyma.11G077300.3.p	Glyma.11G077300.3.p	G.max Wm82.a2.v1	8.78e-57	30	427	+/+	seq.submitted 2021-10-27T13:56:03.967Z UTC	97	508	15	407	196.823	130	217	49	523	427
	phytozome-next.jgi.doe.gov/report/protein/Gmax_Wm82_a2_v1/Glyma.01G166100.1.p	Glyma.01G166100.1.p	G.max Wm82.a2.v1	1.95e-56	31	438	+/+	seq.submitted 2021-10-27T13:56:03.967Z UTC	97	519	150	553	199.134	134	221	49	523	563
	phytozome-next.jgi.doe.gov/report/protein/Gmax_Wm82_a2_v1/Glyma.11G077300.2.p	Glyma.11G077300.2.p	G.max Wm82.a2.v1	5.48e-56	31	423	+/+	seq.submitted 2021-10-27T13:56:03.967Z UTC	97	504	143	531	197.593	130	215	49	523	555
	phytozome-next.jgi.doe.gov/report/protein/Gmax_Wm82_a2_v1/Glyma.11G077300.1.p	Glyma.11G077300.1.p	G.max Wm82.a2.v1	6.76e-56	31	423	+/+	seq.submitted 2021-10-27T13:56:03.967Z UTC	97	504	151	539	197.593	130	215	49	523	563
	phytozome-next.jgi.doe.gov/report/protein/Gmax_Wm82_a2_v1/Glyma.01G166100.2.p	Glyma.01G166100.2.p	G.max Wm82.a2.v1	1.95e-54	32	391	+/+	seq.submitted 2021-10-27T13:56:03.967Z UTC	97	474	150	519	192.586	125	203	34	523	520
	phytozome-next.jgi.doe.gov/report/protein/Gmax_Wm82_a2_v1/Glyma.05G030800.2.p	Glyma.05G030800.2.p	G.max Wm82.a2.v1	4.07e-53	41	242	+/+	seq.submitted 2021-10-27T13:56:03.967Z UTC	98	338	108	348	186.422	100	144	2	523	416
	phytozome-next.jgi.doe.gov/report/protein/Gmax_Wm82_a2_v1/Glyma.11G058000.2.p	Glyma.11G058000.2.p	G.max Wm82.a2.v1	4.79e-50	38	246	+/+	seq.submitted 2021-10-27T13:56:03.967Z UTC	97	341	15	258	178.333	94	147	3	523	415
	phytozome-next.jgi.doe.gov/report/protein/Gmax_Wm82_a2_v1/Glyma.01G184300.4.p	Glyma.01G184300.4.p	G.max Wm82.a2.v1	4.94e-50	39	246	+/+	seq.submitted 2021-10-27T13:56:03.967Z UTC	97	341	15	258	178.333	95	145	3	523	415
	phytozome-next.jgi.doe.gov/report/protein/Gmax_Wm82_a2_v1/Glyma.16G199400.2.p	Glyma.16G199400.2.p	G.max Wm82.a2.v1	4.8e-49	38	239	+/+	seq.submitted 2021-10-27T13:56:03.967Z UTC	102	340	4	241	176.022	91	138	1	523	427
	phytozome-next.jgi.doe.gov/report/protein/Gmax_Wm82_a2_v1/Glyma.16G199400.1.p	Glyma.16G199400.1.p	G.max Wm82.a2.v1	5.08e-49	38	250	+/+	seq.submitted 2021-10-27T13:56:03.967Z UTC	91	340	89	333	177.948	95	143	5	523	519
	phytozome-next.jgi.doe.gov/report/protein/Gmax_Wm82_a2_v1/Glyma.07G210600.1.p	Glyma.07G210600.1.p	G.max Wm82.a2.v1	2.08e-48	32	416	+/+	seq.submitted 2021-10-27T13:56:03.967Z UTC	97	503	197	582	177.948	132	207	39	523	599
	phytozome-next.jgi.doe.gov/report/protein/Gmax_Wm82_a2_v1/Glyma.05G090900.1.p	Glyma.05G090900.1.p	G.max Wm82.a2.v1	3.33e-48	32	376	+/+	seq.submitted 2021-10-27T13:56:03.967Z UTC	97	465	178	535	176.792	121	196	25	523	579
	phytozome-next.jgi.doe.gov/report/protein/Gmax_Wm82_a2_v1/Glyma.07G210600.2.p	Glyma.07G210600.2.p	G.max Wm82.a2.v1	3.84e-48	33	377	+/+	seq.submitted 2021-10-27T13:56:03.967Z UTC	97	464	197	553	176.407	123	192	29	523	555
	phytozome-next.jgi.doe.gov/report/protein/Gmax_Wm82_a2_v1/Glyma.11G058000.1.p	Glyma.11G058000.1.p	G.max Wm82.a2.v1	4.59e-48	38	246	+/+	seq.submitted 2021-10-27T13:56:03.967Z UTC	97	341	169	412	176.407	94	147	3	523	569
	phytozome-next.jgi.doe.gov/report/protein/Gmax_Wm82_a2_v1/Glyma.01G184300.6.p	Glyma.01G184300.6.p	G.max Wm82.a2.v1	5.17e-48	36	265	+/+	seq.submitted 2021-10-27T13:56:03.967Z UTC	97	341	15	277	173.326	96	145	22	523	434
	phytozome-next.jgi.doe.gov/report/protein/Gmax_Wm82_a2_v1/Glyma.01G184300.3.p	Glyma.01G184300.3.p	G.max Wm82.a2.v1	8.84e-48	39	246	+/+	seq.submitted 2021-10-27T13:56:03.967Z UTC	97	341	186	429	176.022	95	145	3	523	586
	phytozome-next.jgi.doe.gov/report/protein/Gmax_Wm82_a2_v1/Glyma.19G129200.1.p	Glyma.19G129200.1.p	G.max Wm82.a2.v1	1.48e-47	31	380	+/+	seq.submitted 2021-10-27T13:56:03.967Z UTC	97	469	15	377	171.785	118	195	24	523	417
	phytozome-next.jgi.doe.gov/report/protein/Gmax_Wm82_a2_v1/Glyma.02G134600.1.p	Glyma.02G134600.1.p	G.max Wm82.a2.v1	1.03e-46	31	416	+/+	seq.submitted 2021-10-27T13:56:03.967Z UTC	97	503	197	582	173.326	131	206	39	523	599
	phytozome-next.jgi.doe.gov/report/protein/Gmax_Wm82_a2_v1/Glyma.01G184300.1.p	Glyma.01G184300.1.p	G.max Wm82.a2.v1	7.01e-46	36	265	+/+	seq.submitted 2021-10-27T13:56:03.967Z UTC	97	341	186	448	171.014	96	145	22	523	605
	phytozome-next.jgi.doe.gov/report/protein/Gmax_Wm82_a2_v1/Glyma.06G134200.1.p	Glyma.06G134200.1.p	G.max Wm82.a2.v1	9.98e-46	35	310	+/+	seq.submitted 2021-10-27T13:56:03.967Z UTC	97	400	198	500	170.629	107	168	13	523	600
	phytozome-next.jgi.doe.gov/report/protein/Gmax_Wm82_a2_v1/Glyma.08G019700.1.p	Glyma.08G019700.1.p	G.max Wm82.a2.v1	7.05e-45	35	304	+/+	seq.submitted 2021-10-27T13:56:03.967Z UTC	97	395	104	364	164.851	105	159	48	523	438
	phytozome-next.jgi.doe.gov/report/protein/Gmax_Wm82_a2_v1/Glyma.02G163300.3.p	Glyma.02G163300.3.p	G.max Wm82.a2.v1	8.12e-45	34	331	+/+	seq.submitted 2021-10-27T13:56:03.967Z UTC	97	425	182	500	167.162	112	175	14	523	548
	phytozome-next.jgi.doe.gov/report/protein/Gmax_Wm82_a2_v1/Glyma.02G163300.1.p	Glyma.02G163300.1.p	G.max Wm82.a2.v1	1.23e-44	31	414	+/+	seq.submitted 2021-10-27T13:56:03.967Z UTC	97	503	182	568	167.162	128	203	34	523	584
	phytozome-next.jgi.doe.gov/report/protein/Gmax_Wm82_a2_v1/Glyma.16G020600.1.p	Glyma.16G020600.1.p	G.max Wm82.a2.v1	2.42e-44	29	387	+/+	seq.submitted 2021-10-27T13:56:03.967Z UTC	97	469	15	375	162.925	112	196	40	523	416
	phytozome-next.jgi.doe.gov/report/protein/Gmax_Wm82_a2_v1/Glyma.07G051600.1.p	Glyma.07G051600.1.p	G.max Wm82.a2.v1	5.28e-44	30	382	+/+	seq.submitted 2021-10-27T13:56:03.967Z UTC	97	469	192	552	165.622	113	200	30	523	593
	phytozome-next.jgi.doe.gov/report/protein/Gmax_Wm82_a2_v1/Glyma.02G163300.5.p	Glyma.02G163300.5.p	G.max Wm82.a2.v1	1.17e-43	39	244	+/+	seq.submitted 2021-10-27T13:56:03.967Z UTC	97	338	182	424	161.384	94	140	3	523	427
	phytozome-next.jgi.doe.gov/report/protein/Gmax_Wm82_a2_v1/Glyma.02G163300.4.p	Glyma.02G163300.4.p	G.max Wm82.a2.v1	1.55e-43	34	307	+/+	seq.submitted 2021-10-27T13:56:03.967Z UTC	97	399	182	484	162.925	105	161	8	523	509
	phytozome-next.jgi.doe.gov/report/protein/Gmax_Wm82_a2_v1/Glyma.04G231000.1.p	Glyma.04G231000.1.p	G.max Wm82.a2.v1	6e-43	38	234	+/+	seq.submitted 2021-10-27T13:56:03.967Z UTC	83	310	177	409	162.54	88	138	7	523	598
	phytozome-next.jgi.doe.gov/report/protein/Gmax_Wm82_a2_v1/Glyma.03G251400.1.p	Glyma.03G251400.1.p	G.max Wm82.a2.v1	2.15e-42	37	205	+/+	seq.submitted 2021-10-27T13:56:03.967Z UTC	102	306	66	267	154.066	75	118	3	523	283
	phytozome-next.jgi.doe.gov/report/protein/Gmax_Wm82_a2_v1/Glyma.10G186000.1.p	Glyma.10G186000.1.p	G.max Wm82.a2.v1	3.5e-42	30	301	+/+	seq.submitted 2021-10-27T13:56:03.967Z UTC	5	305	2	262	152.91	89	158	40	523	271
	phytozome-next.jgi.doe.gov/report/protein/Gmax_Wm82_a2_v1/Glyma.04G097100.1.p	Glyma.04G097100.1.p	G.max Wm82.a2.v1	1.24e-41	40	235	+/+	seq.submitted 2021-10-27T13:56:03.967Z UTC	86	318	139	369	156.762	93	129	6	523	468
	phytozome-next.jgi.doe.gov/report/protein/Gmax_Wm82_a2_v1/Glyma.01G184300.5.p	Glyma.01G184300.5.p	G.max Wm82.a2.v1	3.77e-41	36	245	+/+	seq.submitted 2021-10-27T13:56:03.967Z UTC	97	341	15	244	153.68	88	135	15	523	401
	phytozome-next.jgi.doe.gov/report/protein/Gmax_Wm82_a2_v1/Glyma.14G179000.1.p	Glyma.14G179000.1.p	G.max Wm82.a2.v1	1.76e-40	38	257	+/+	seq.submitted 2021-10-27T13:56:03.967Z UTC	86	340	118	361	152.91	97	141	15	523	448
	phytozome-next.jgi.doe.gov/report/protein/Gmax_Wm82_a2_v1/Glyma.14G179000.2.p	Glyma.14G179000.2.p	G.max Wm82.a2.v1	1.76e-40	38	257	+/+	seq.submitted 2021-10-27T13:56:03.967Z UTC	86	340	118	361	152.91	97	141	15	523	448
	phytozome-next.jgi.doe.gov/report/protein/Gmax_Wm82_a2_v1/Glyma.06G098900.1.p	Glyma.06G098900.1.p	G.max Wm82.a2.v1	2.07e-40	39	235	+/+	seq.submitted 2021-10-27T13:56:03.967Z UTC	86	318	139	369	153.295	92	127	6	523	468
	Paralogs	Protein/Splice variants	Species	E-value	% identity	Align len	Strands	Query ID	Query from	Query to	Target from	Target to	Bitscore
	1	Glyma.15G222300.1.p	G.max Wm82.a2.v1	0	87	529	+/+	seq.submitted 2021-10-27T13:56:03.967Z UTC	1	523	1	526	924.85
	2	Glyma.08G227200.1.p	G.max Wm82.a2.v1	0	86	529	+/+	seq.submitted 2021-10-27T13:56:03.967Z UTC	1	523	1	525	917.916

## Sheet: Gossypium
	Views	Protein	Species	E-value	% identity	Align len	Strands	Query ID	Query from	Query to	Target from	Target to	Bitscore	# identical	Positives	Gaps	Query len	Target len
	phytozome-next.jgi.doe.gov/report/protein/Ghirsutum_v2_1/Gohir.D06G178600.1.p	Gohir.D06G178600.1.p	G.hirsutum v2.1	0	75	522	+/+	seq.submitted 2021-10-26T21:56:05.345Z UTC	1	522	1	518	800.045	392	453	4	523	521
	phytozome-next.jgi.doe.gov/report/protein/Ghirsutum_v2_1/Gohir.A06G170800.1.p	Gohir.A06G170800.1.p	G.hirsutum v2.1	0	75	522	+/+	seq.submitted 2021-10-26T21:56:05.345Z UTC	1	522	1	518	797.734	392	451	4	523	521
	phytozome-next.jgi.doe.gov/report/protein/Ghirsutum_v2_1/Gohir.D06G178600.2.p	Gohir.D06G178600.2.p	G.hirsutum v2.1	0	74	466	+/+	seq.submitted 2021-10-26T21:56:05.345Z UTC	1	466	1	462	701.434	343	401	4	523	508
	phytozome-next.jgi.doe.gov/report/protein/Ghirsutum_v2_1/Gohir.D06G178600.3.p	Gohir.D06G178600.3.p	G.hirsutum v2.1	0	74	466	+/+	seq.submitted 2021-10-26T21:56:05.345Z UTC	1	466	1	462	701.434	343	401	4	523	492
	phytozome-next.jgi.doe.gov/report/protein/Ghirsutum_v2_1/Gohir.A06G170800.2.p	Gohir.A06G170800.2.p	G.hirsutum v2.1	0	73	448	+/+	seq.submitted 2021-10-26T21:56:05.345Z UTC	1	448	1	444	662.529	326	381	4	523	482
	phytozome-next.jgi.doe.gov/report/protein/Ghirsutum_v2_1/Gohir.A08G010400.1.p	Gohir.A08G010400.1.p	G.hirsutum v2.1	2.15e-78	36	417	+/+	seq.submitted 2021-10-26T21:56:05.345Z UTC	97	509	129	518	256.914	150	229	31	523	539
	phytozome-next.jgi.doe.gov/report/protein/Ghirsutum_v2_1/Gohir.A13G218300.1.p	Gohir.A13G218300.1.p	G.hirsutum v2.1	9.06e-78	35	417	+/+	seq.submitted 2021-10-26T21:56:05.345Z UTC	97	509	123	512	254.988	148	227	31	523	528
	phytozome-next.jgi.doe.gov/report/protein/Ghirsutum_v2_1/Gohir.A13G199050.1.p	Gohir.A13G199050.1.p	G.hirsutum v2.1	2.52e-77	35	417	+/+	seq.submitted 2021-10-26T21:56:05.345Z UTC	97	509	129	518	254.218	147	229	31	523	539
	phytozome-next.jgi.doe.gov/report/protein/Ghirsutum_v2_1/Gohir.D08G020500.1.p	Gohir.D08G020500.1.p	G.hirsutum v2.1	2.52e-77	35	417	+/+	seq.submitted 2021-10-26T21:56:05.345Z UTC	97	509	129	518	254.218	147	229	31	523	539
	phytozome-next.jgi.doe.gov/report/protein/Ghirsutum_v2_1/Gohir.D13G222000.1.p	Gohir.D13G222000.1.p	G.hirsutum v2.1	2.58e-77	35	417	+/+	seq.submitted 2021-10-26T21:56:05.345Z UTC	97	509	123	512	253.832	147	227	31	523	528
	phytozome-next.jgi.doe.gov/report/protein/Ghirsutum_v2_1/Gohir.D07G124400.1.p	Gohir.D07G124400.1.p	G.hirsutum v2.1	4.42e-77	34	457	+/+	seq.submitted 2021-10-26T21:56:05.345Z UTC	61	509	75	498	252.677	157	245	41	523	514
	phytozome-next.jgi.doe.gov/report/protein/Ghirsutum_v2_1/Gohir.A10G196600.1.p	Gohir.A10G196600.1.p	G.hirsutum v2.1	4.85e-77	36	451	+/+	seq.submitted 2021-10-26T21:56:05.345Z UTC	69	508	143	561	254.603	164	245	43	523	588
	phytozome-next.jgi.doe.gov/report/protein/Ghirsutum_v2_1/Gohir.D10G203700.2.p	Gohir.D10G203700.2.p	G.hirsutum v2.1	5.46e-77	38	434	+/+	seq.submitted 2021-10-26T21:56:05.345Z UTC	87	508	156	557	254.603	163	241	44	523	584
	phytozome-next.jgi.doe.gov/report/protein/Ghirsutum_v2_1/Gohir.A07G121000.1.p	Gohir.A07G121000.1.p	G.hirsutum v2.1	7.66e-77	36	421	+/+	seq.submitted 2021-10-26T21:56:05.345Z UTC	97	509	109	498	252.292	150	231	39	523	514
	phytozome-next.jgi.doe.gov/report/protein/Ghirsutum_v2_1/Gohir.A13G003300.3.p	Gohir.A13G003300.3.p	G.hirsutum v2.1	1.9e-76	37	452	+/+	seq.submitted 2021-10-26T21:56:05.345Z UTC	69	509	107	526	252.292	165	245	43	523	558
	phytozome-next.jgi.doe.gov/report/protein/Ghirsutum_v2_1/Gohir.A13G003300.2.p	Gohir.A13G003300.2.p	G.hirsutum v2.1	3.11e-76	37	452	+/+	seq.submitted 2021-10-26T21:56:05.345Z UTC	69	509	129	548	252.292	165	245	43	523	580
	phytozome-next.jgi.doe.gov/report/protein/Ghirsutum_v2_1/Gohir.A04G055600.1.p	Gohir.A04G055600.1.p	G.hirsutum v2.1	1.78e-75	36	417	+/+	seq.submitted 2021-10-26T21:56:05.345Z UTC	97	509	180	568	250.751	150	230	32	523	588
	phytozome-next.jgi.doe.gov/report/protein/Ghirsutum_v2_1/Gohir.D09G107200.1.p	Gohir.D09G107200.1.p	G.hirsutum v2.1	3.25e-75	36	422	+/+	seq.submitted 2021-10-26T21:56:05.345Z UTC	97	509	122	511	248.44	151	230	41	523	525
	phytozome-next.jgi.doe.gov/report/protein/Ghirsutum_v2_1/Gohir.A06G001100.1.p	Gohir.A06G001100.1.p	G.hirsutum v2.1	5.55e-75	35	416	+/+	seq.submitted 2021-10-26T21:56:05.345Z UTC	98	511	122	513	247.669	145	224	26	523	527
	phytozome-next.jgi.doe.gov/report/protein/Ghirsutum_v2_1/Gohir.A12G232700.1.p	Gohir.A12G232700.1.p	G.hirsutum v2.1	5.75e-75	35	417	+/+	seq.submitted 2021-10-26T21:56:05.345Z UTC	97	509	133	522	248.054	146	226	31	523	535
	phytozome-next.jgi.doe.gov/report/protein/Ghirsutum_v2_1/Gohir.D04G092800.1.p	Gohir.D04G092800.1.p	G.hirsutum v2.1	6.01e-75	37	418	+/+	seq.submitted 2021-10-26T21:56:05.345Z UTC	97	509	221	609	250.366	154	233	34	523	629
	phytozome-next.jgi.doe.gov/report/protein/Ghirsutum_v2_1/Gohir.D12G234700.1.p	Gohir.D12G234700.1.p	G.hirsutum v2.1	6.67e-75	35	417	+/+	seq.submitted 2021-10-26T21:56:05.345Z UTC	97	509	133	522	247.669	146	225	31	523	535
	phytozome-next.jgi.doe.gov/report/protein/Ghirsutum_v2_1/Gohir.A09G110800.1.p	Gohir.A09G110800.1.p	G.hirsutum v2.1	9.41e-75	33	518	+/+	seq.submitted 2021-10-26T21:56:05.345Z UTC	1	509	61	511	246.899	171	262	76	523	524
	phytozome-next.jgi.doe.gov/report/protein/Ghirsutum_v2_1/Gohir.D05G076700.1.p	Gohir.D05G076700.1.p	G.hirsutum v2.1	4.81e-74	32	513	+/+	seq.submitted 2021-10-26T21:56:05.345Z UTC	1	509	64	513	245.358	163	255	67	523	533
	phytozome-next.jgi.doe.gov/report/protein/Ghirsutum_v2_1/Gohir.D01G122700.1.p	Gohir.D01G122700.1.p	G.hirsutum v2.1	1.02e-73	37	415	+/+	seq.submitted 2021-10-26T21:56:05.345Z UTC	97	508	192	579	246.128	154	225	30	523	592
	phytozome-next.jgi.doe.gov/report/protein/Ghirsutum_v2_1/Gohir.D04G040500.1.p	Gohir.D04G040500.1.p	G.hirsutum v2.1	1.42e-73	37	421	+/+	seq.submitted 2021-10-26T21:56:05.345Z UTC	97	509	75	463	243.047	155	224	40	523	498
	phytozome-next.jgi.doe.gov/report/protein/Ghirsutum_v2_1/Gohir.D04G040500.2.p	Gohir.D04G040500.2.p	G.hirsutum v2.1	1.42e-73	37	421	+/+	seq.submitted 2021-10-26T21:56:05.345Z UTC	97	509	75	463	243.047	155	224	40	523	498
	phytozome-next.jgi.doe.gov/report/protein/Ghirsutum_v2_1/Gohir.A02G103800.2.p	Gohir.A02G103800.2.p	G.hirsutum v2.1	1.71e-73	35	419	+/+	seq.submitted 2021-10-26T21:56:05.345Z UTC	97	509	118	507	243.432	147	226	35	523	520
	phytozome-next.jgi.doe.gov/report/protein/Ghirsutum_v2_1/Gohir.A01G135500.1.p	Gohir.A01G135500.1.p	G.hirsutum v2.1	2.46e-73	37	417	+/+	seq.submitted 2021-10-26T21:56:05.345Z UTC	97	508	192	579	244.973	155	227	34	523	591
	phytozome-next.jgi.doe.gov/report/protein/Ghirsutum_v2_1/Gohir.D05G186200.2.p	Gohir.D05G186200.2.p	G.hirsutum v2.1	2.1e-72	35	414	+/+	seq.submitted 2021-10-26T21:56:05.345Z UTC	98	509	120	509	240.736	143	219	26	523	518
	phytozome-next.jgi.doe.gov/report/protein/Ghirsutum_v2_1/Gohir.D06G213700.1.p	Gohir.D06G213700.1.p	G.hirsutum v2.1	3.13e-72	35	416	+/+	seq.submitted 2021-10-26T21:56:05.345Z UTC	97	508	129	517	240.35	144	225	31	523	528
	phytozome-next.jgi.doe.gov/report/protein/Ghirsutum_v2_1/Gohir.A05G375200.1.p	Gohir.A05G375200.1.p	G.hirsutum v2.1	4.29e-72	37	421	+/+	seq.submitted 2021-10-26T21:56:05.345Z UTC	97	509	75	463	239.195	154	223	40	523	498
	phytozome-next.jgi.doe.gov/report/protein/Ghirsutum_v2_1/Gohir.A05G375200.2.p	Gohir.A05G375200.2.p	G.hirsutum v2.1	4.29e-72	37	421	+/+	seq.submitted 2021-10-26T21:56:05.345Z UTC	97	509	75	463	239.195	154	223	40	523	498
	phytozome-next.jgi.doe.gov/report/protein/Ghirsutum_v2_1/Gohir.D03G079900.4.p	Gohir.D03G079900.4.p	G.hirsutum v2.1	1.4e-71	35	409	+/+	seq.submitted 2021-10-26T21:56:05.345Z UTC	107	509	6	385	234.958	144	219	35	523	398
	phytozome-next.jgi.doe.gov/report/protein/Ghirsutum_v2_1/Gohir.D12G013700.1.p	Gohir.D12G013700.1.p	G.hirsutum v2.1	1.4e-71	36	424	+/+	seq.submitted 2021-10-26T21:56:05.345Z UTC	97	512	74	465	237.654	152	227	40	523	488
	phytozome-next.jgi.doe.gov/report/protein/Ghirsutum_v2_1/Gohir.A12G012900.2.p	Gohir.A12G012900.2.p	G.hirsutum v2.1	1.66e-71	36	424	+/+	seq.submitted 2021-10-26T21:56:05.345Z UTC	97	512	74	465	237.654	151	227	40	523	488
	phytozome-next.jgi.doe.gov/report/protein/Ghirsutum_v2_1/Gohir.A06G207600.1.p	Gohir.A06G207600.1.p	G.hirsutum v2.1	2.97e-71	34	416	+/+	seq.submitted 2021-10-26T21:56:05.345Z UTC	97	508	129	517	238.039	143	225	31	523	528
	phytozome-next.jgi.doe.gov/report/protein/Ghirsutum_v2_1/Gohir.A09G132600.1.p	Gohir.A09G132600.1.p	G.hirsutum v2.1	6.01e-71	35	417	+/+	seq.submitted 2021-10-26T21:56:05.345Z UTC	97	509	196	584	239.195	145	225	32	523	611
	phytozome-next.jgi.doe.gov/report/protein/Ghirsutum_v2_1/Gohir.D04G093200.1.p	Gohir.D04G093200.1.p	G.hirsutum v2.1	1.69e-70	34	445	+/+	seq.submitted 2021-10-26T21:56:05.345Z UTC	69	508	141	559	237.269	151	230	31	523	573
	phytozome-next.jgi.doe.gov/report/protein/Ghirsutum_v2_1/Gohir.A05G274900.1.p	Gohir.A05G274900.1.p	G.hirsutum v2.1	2.29e-70	36	422	+/+	seq.submitted 2021-10-26T21:56:05.345Z UTC	91	508	79	468	234.958	151	220	36	523	503
	phytozome-next.jgi.doe.gov/report/protein/Ghirsutum_v2_1/Gohir.A11G023500.1.p	Gohir.A11G023500.1.p	G.hirsutum v2.1	2.42e-70	32	450	+/+	seq.submitted 2021-10-26T21:56:05.345Z UTC	67	509	96	518	235.728	146	237	34	523	531
	phytozome-next.jgi.doe.gov/report/protein/Ghirsutum_v2_1/Gohir.A01G079700.2.p	Gohir.A01G079700.2.p	G.hirsutum v2.1	3.4e-70	33	447	+/+	seq.submitted 2021-10-26T21:56:05.345Z UTC	69	508	109	528	235.343	146	234	34	523	538
	phytozome-next.jgi.doe.gov/report/protein/Ghirsutum_v2_1/Gohir.A01G079700.1.p	Gohir.A01G079700.1.p	G.hirsutum v2.1	3.4e-70	33	447	+/+	seq.submitted 2021-10-26T21:56:05.345Z UTC	69	508	109	528	235.343	146	234	34	523	538
	phytozome-next.jgi.doe.gov/report/protein/Ghirsutum_v2_1/Gohir.D01G066900.4.p	Gohir.D01G066900.4.p	G.hirsutum v2.1	7.96e-70	33	447	+/+	seq.submitted 2021-10-26T21:56:05.345Z UTC	69	508	109	528	234.572	146	233	34	523	538
	phytozome-next.jgi.doe.gov/report/protein/Ghirsutum_v2_1/Gohir.D01G066900.2.p	Gohir.D01G066900.2.p	G.hirsutum v2.1	7.96e-70	33	447	+/+	seq.submitted 2021-10-26T21:56:05.345Z UTC	69	508	109	528	234.572	146	233	34	523	538
	phytozome-next.jgi.doe.gov/report/protein/Ghirsutum_v2_1/Gohir.D11G023200.1.p	Gohir.D11G023200.1.p	G.hirsutum v2.1	2.24e-69	32	450	+/+	seq.submitted 2021-10-26T21:56:05.345Z UTC	67	509	96	518	233.032	145	235	34	523	531
	phytozome-next.jgi.doe.gov/report/protein/Ghirsutum_v2_1/Gohir.A13G137900.1.p	Gohir.A13G137900.1.p	G.hirsutum v2.1	2.27e-69	33	416	+/+	seq.submitted 2021-10-26T21:56:05.345Z UTC	97	508	139	527	233.032	138	221	31	523	537
	phytozome-next.jgi.doe.gov/report/protein/Ghirsutum_v2_1/Gohir.D05G277200.2.p	Gohir.D05G277200.2.p	G.hirsutum v2.1	3.17e-69	36	422	+/+	seq.submitted 2021-10-26T21:56:05.345Z UTC	91	508	79	468	231.876	151	220	36	523	503
	phytozome-next.jgi.doe.gov/report/protein/Ghirsutum_v2_1/Gohir.D05G277200.3.p	Gohir.D05G277200.3.p	G.hirsutum v2.1	3.17e-69	36	422	+/+	seq.submitted 2021-10-26T21:56:05.345Z UTC	91	508	79	468	231.876	151	220	36	523	503
	phytozome-next.jgi.doe.gov/report/protein/Ghirsutum_v2_1/Gohir.D05G277200.4.p	Gohir.D05G277200.4.p	G.hirsutum v2.1	3.17e-69	36	422	+/+	seq.submitted 2021-10-26T21:56:05.345Z UTC	91	508	79	468	231.876	151	220	36	523	503
	phytozome-next.jgi.doe.gov/report/protein/Ghirsutum_v2_1/Gohir.D05G277200.5.p	Gohir.D05G277200.5.p	G.hirsutum v2.1	3.17e-69	36	422	+/+	seq.submitted 2021-10-26T21:56:05.345Z UTC	91	508	79	468	231.876	151	220	36	523	503
	phytozome-next.jgi.doe.gov/report/protein/Ghirsutum_v2_1/Gohir.D02G193700.1.p	Gohir.D02G193700.1.p	G.hirsutum v2.1	4.22e-69	36	424	+/+	seq.submitted 2021-10-26T21:56:05.345Z UTC	97	512	155	546	233.417	151	226	40	523	569
	phytozome-next.jgi.doe.gov/report/protein/Ghirsutum_v2_1/Gohir.D05G369600.1.p	Gohir.D05G369600.1.p	G.hirsutum v2.1	4.7e-69	33	447	+/+	seq.submitted 2021-10-26T21:56:05.345Z UTC	69	508	96	515	231.876	146	232	34	523	525
	phytozome-next.jgi.doe.gov/report/protein/Ghirsutum_v2_1/Gohir.D13G056800.2.p	Gohir.D13G056800.2.p	G.hirsutum v2.1	5.06e-69	35	424	+/+	seq.submitted 2021-10-26T21:56:05.345Z UTC	97	512	74	465	231.106	150	224	40	523	488
	phytozome-next.jgi.doe.gov/report/protein/Ghirsutum_v2_1/Gohir.A03G170600.1.p	Gohir.A03G170600.1.p	G.hirsutum v2.1	5.96e-69	36	424	+/+	seq.submitted 2021-10-26T21:56:05.345Z UTC	97	512	155	546	233.032	151	226	40	523	569
	phytozome-next.jgi.doe.gov/report/protein/Ghirsutum_v2_1/Gohir.A04G016600.1.p	Gohir.A04G016600.1.p	G.hirsutum v2.1	7.7e-69	32	447	+/+	seq.submitted 2021-10-26T21:56:05.345Z UTC	69	508	96	515	231.491	144	232	34	523	525
	phytozome-next.jgi.doe.gov/report/protein/Ghirsutum_v2_1/Gohir.D13G142500.1.p	Gohir.D13G142500.1.p	G.hirsutum v2.1	1.04e-68	33	416	+/+	seq.submitted 2021-10-26T21:56:05.345Z UTC	97	508	139	527	231.491	136	221	31	523	537
	phytozome-next.jgi.doe.gov/report/protein/Ghirsutum_v2_1/Gohir.D13G056700.2.p	Gohir.D13G056700.2.p	G.hirsutum v2.1	1.24e-68	35	424	+/+	seq.submitted 2021-10-26T21:56:05.345Z UTC	97	512	110	501	230.72	148	224	40	523	524
	phytozome-next.jgi.doe.gov/report/protein/Ghirsutum_v2_1/Gohir.D13G056700.3.p	Gohir.D13G056700.3.p	G.hirsutum v2.1	1.24e-68	35	424	+/+	seq.submitted 2021-10-26T21:56:05.345Z UTC	97	512	110	501	230.72	148	224	40	523	524
	phytozome-next.jgi.doe.gov/report/protein/Ghirsutum_v2_1/Gohir.D13G056700.1.p	Gohir.D13G056700.1.p	G.hirsutum v2.1	1.24e-68	35	424	+/+	seq.submitted 2021-10-26T21:56:05.345Z UTC	97	512	110	501	230.72	148	224	40	523	524
	phytozome-next.jgi.doe.gov/report/protein/Ghirsutum_v2_1/Gohir.D13G056700.4.p	Gohir.D13G056700.4.p	G.hirsutum v2.1	1.24e-68	35	424	+/+	seq.submitted 2021-10-26T21:56:05.345Z UTC	97	512	110	501	230.72	148	224	40	523	524
	phytozome-next.jgi.doe.gov/report/protein/Ghirsutum_v2_1/Gohir.A09G123400.1.p	Gohir.A09G123400.1.p	G.hirsutum v2.1	1.38e-68	34	414	+/+	seq.submitted 2021-10-26T21:56:05.345Z UTC	97	508	105	494	231.106	140	219	26	523	532
	phytozome-next.jgi.doe.gov/report/protein/Ghirsutum_v2_1/Gohir.D13G056800.1.p	Gohir.D13G056800.1.p	G.hirsutum v2.1	1.41e-68	35	424	+/+	seq.submitted 2021-10-26T21:56:05.345Z UTC	97	512	115	506	230.72	150	224	40	523	529
	phytozome-next.jgi.doe.gov/report/protein/Ghirsutum_v2_1/Gohir.A13G064600.6.p	Gohir.A13G064600.6.p	G.hirsutum v2.1	1.59e-68	35	424	+/+	seq.submitted 2021-10-26T21:56:05.345Z UTC	97	512	74	465	229.565	149	224	40	523	488
	phytozome-next.jgi.doe.gov/report/protein/Ghirsutum_v2_1/Gohir.A13G064600.7.p	Gohir.A13G064600.7.p	G.hirsutum v2.1	1.59e-68	35	424	+/+	seq.submitted 2021-10-26T21:56:05.345Z UTC	97	512	74	465	229.565	149	224	40	523	488
	phytozome-next.jgi.doe.gov/report/protein/Ghirsutum_v2_1/Gohir.A13G064600.8.p	Gohir.A13G064600.8.p	G.hirsutum v2.1	1.59e-68	35	424	+/+	seq.submitted 2021-10-26T21:56:05.345Z UTC	97	512	74	465	229.565	149	224	40	523	488
	phytozome-next.jgi.doe.gov/report/protein/Ghirsutum_v2_1/Gohir.D02G065600.1.p	Gohir.D02G065600.1.p	G.hirsutum v2.1	1.83e-68	34	419	+/+	seq.submitted 2021-10-26T21:56:05.345Z UTC	97	513	80	472	229.95	143	219	28	523	509
	phytozome-next.jgi.doe.gov/report/protein/Ghirsutum_v2_1/Gohir.A02G060100.1.p	Gohir.A02G060100.1.p	G.hirsutum v2.1	2.66e-68	34	419	+/+	seq.submitted 2021-10-26T21:56:05.345Z UTC	97	513	80	472	229.565	143	219	28	523	512
	phytozome-next.jgi.doe.gov/report/protein/Ghirsutum_v2_1/Gohir.D04G130900.1.p	Gohir.D04G130900.1.p	G.hirsutum v2.1	3.85e-68	33	432	+/+	seq.submitted 2021-10-26T21:56:05.345Z UTC	80	508	90	492	229.565	141	231	32	523	528
	phytozome-next.jgi.doe.gov/report/protein/Ghirsutum_v2_1/Gohir.A05G073800.1.p	Gohir.A05G073800.1.p	G.hirsutum v2.1	4.34e-68	34	389	+/+	seq.submitted 2021-10-26T21:56:05.345Z UTC	125	509	1	361	225.328	134	205	32	523	381
	phytozome-next.jgi.doe.gov/report/protein/Ghirsutum_v2_1/Gohir.A04G090900.1.p	Gohir.A04G090900.1.p	G.hirsutum v2.1	1.8e-67	33	421	+/+	seq.submitted 2021-10-26T21:56:05.345Z UTC	91	508	101	492	228.024	139	226	32	523	528
	phytozome-next.jgi.doe.gov/report/protein/Ghirsutum_v2_1/Gohir.D09G120400.1.p	Gohir.D09G120400.1.p	G.hirsutum v2.1	2.09e-67	33	414	+/+	seq.submitted 2021-10-26T21:56:05.345Z UTC	97	508	105	494	228.024	138	219	26	523	532
	phytozome-next.jgi.doe.gov/report/protein/Ghirsutum_v2_1/Gohir.A13G064500.3.p	Gohir.A13G064500.3.p	G.hirsutum v2.1	6.17e-67	35	424	+/+	seq.submitted 2021-10-26T21:56:05.345Z UTC	97	512	74	465	225.328	147	221	40	523	488
	phytozome-next.jgi.doe.gov/report/protein/Ghirsutum_v2_1/Gohir.A04G055900.1.p	Gohir.A04G055900.1.p	G.hirsutum v2.1	7.17e-67	34	449	+/+	seq.submitted 2021-10-26T21:56:05.345Z UTC	69	508	141	556	227.254	153	230	42	523	570
	phytozome-next.jgi.doe.gov/report/protein/Ghirsutum_v2_1/Gohir.D11G348400.1.p	Gohir.D11G348400.1.p	G.hirsutum v2.1	1.5e-66	33	424	+/+	seq.submitted 2021-10-26T21:56:05.345Z UTC	91	508	101	492	225.328	142	223	38	523	528
	phytozome-next.jgi.doe.gov/report/protein/Ghirsutum_v2_1/Gohir.A13G064500.1.p	Gohir.A13G064500.1.p	G.hirsutum v2.1	2e-66	35	424	+/+	seq.submitted 2021-10-26T21:56:05.345Z UTC	97	512	110	501	224.942	147	221	40	523	524
	phytozome-next.jgi.doe.gov/report/protein/Ghirsutum_v2_1/Gohir.A13G064500.2.p	Gohir.A13G064500.2.p	G.hirsutum v2.1	2e-66	35	424	+/+	seq.submitted 2021-10-26T21:56:05.345Z UTC	97	512	110	501	224.942	147	221	40	523	524
	phytozome-next.jgi.doe.gov/report/protein/Ghirsutum_v2_1/Gohir.D04G152100.1.p	Gohir.D04G152100.1.p	G.hirsutum v2.1	3.68e-66	35	421	+/+	seq.submitted 2021-10-26T21:56:05.345Z UTC	97	509	139	527	224.942	148	222	40	523	553
	phytozome-next.jgi.doe.gov/report/protein/Ghirsutum_v2_1/Gohir.A11G329300.1.p	Gohir.A11G329300.1.p	G.hirsutum v2.1	3.69e-66	33	421	+/+	seq.submitted 2021-10-26T21:56:05.345Z UTC	91	508	101	492	224.557	140	221	32	523	528
	phytozome-next.jgi.doe.gov/report/protein/Ghirsutum_v2_1/Gohir.A04G111800.2.p	Gohir.A04G111800.2.p	G.hirsutum v2.1	4.99e-66	35	421	+/+	seq.submitted 2021-10-26T21:56:05.345Z UTC	97	509	139	527	224.557	148	222	40	523	553
	phytozome-next.jgi.doe.gov/report/protein/Ghirsutum_v2_1/Gohir.D04G093200.2.p	Gohir.D04G093200.2.p	G.hirsutum v2.1	8.95e-66	33	470	+/+	seq.submitted 2021-10-26T21:56:05.345Z UTC	69	508	141	580	224.942	155	231	60	523	594
	phytozome-next.jgi.doe.gov/report/protein/Ghirsutum_v2_1/Gohir.A10G012700.1.p	Gohir.A10G012700.1.p	G.hirsutum v2.1	3.57e-65	34	441	+/+	seq.submitted 2021-10-26T21:56:05.345Z UTC	97	521	145	551	222.631	150	227	50	523	553
	phytozome-next.jgi.doe.gov/report/protein/Ghirsutum_v2_1/Gohir.D03G067800.1.p	Gohir.D03G067800.1.p	G.hirsutum v2.1	5.53e-65	33	415	+/+	seq.submitted 2021-10-26T21:56:05.345Z UTC	98	508	110	498	221.861	137	220	30	523	551
	phytozome-next.jgi.doe.gov/report/protein/Ghirsutum_v2_1/Gohir.D10G012500.3.p	Gohir.D10G012500.3.p	G.hirsutum v2.1	1.15e-64	33	436	+/+	seq.submitted 2021-10-26T21:56:05.345Z UTC	97	521	144	550	221.09	143	227	40	523	552
	phytozome-next.jgi.doe.gov/report/protein/Ghirsutum_v2_1/Gohir.A11G028991.1.p	Gohir.A11G028991.1.p	G.hirsutum v2.1	1.63e-64	33	413	+/+	seq.submitted 2021-10-26T21:56:05.345Z UTC	98	508	119	507	220.705	137	215	26	523	551
	phytozome-next.jgi.doe.gov/report/protein/Ghirsutum_v2_1/Gohir.D11G032300.5.p	Gohir.D11G032300.5.p	G.hirsutum v2.1	2.95e-64	33	413	+/+	seq.submitted 2021-10-26T21:56:05.345Z UTC	98	508	119	507	219.935	136	216	26	523	551
	phytozome-next.jgi.doe.gov/report/protein/Ghirsutum_v2_1/Gohir.D11G032300.4.p	Gohir.D11G032300.4.p	G.hirsutum v2.1	2.95e-64	33	413	+/+	seq.submitted 2021-10-26T21:56:05.345Z UTC	98	508	119	507	219.935	136	216	26	523	551
	phytozome-next.jgi.doe.gov/report/protein/Ghirsutum_v2_1/Gohir.A02G111503.1.p	Gohir.A02G111503.1.p	G.hirsutum v2.1	5.58e-64	33	415	+/+	seq.submitted 2021-10-26T21:56:05.345Z UTC	98	508	110	498	218.779	137	218	30	523	536
	phytozome-next.jgi.doe.gov/report/protein/Ghirsutum_v2_1/Gohir.D13G003200.2.p	Gohir.D13G003200.2.p	G.hirsutum v2.1	3.22e-62	37	361	+/+	seq.submitted 2021-10-26T21:56:05.345Z UTC	69	422	129	469	212.616	132	201	27	523	473
	phytozome-next.jgi.doe.gov/report/protein/Ghirsutum_v2_1/Gohir.A09G114000.1.p	Gohir.A09G114000.1.p	G.hirsutum v2.1	4.49e-62	31	419	+/+	seq.submitted 2021-10-26T21:56:05.345Z UTC	98	508	110	497	213.772	131	221	39	523	532
	phytozome-next.jgi.doe.gov/report/protein/Ghirsutum_v2_1/Gohir.A13G137900.2.p	Gohir.A13G137900.2.p	G.hirsutum v2.1	4.89e-62	35	362	+/+	seq.submitted 2021-10-26T21:56:05.345Z UTC	97	454	139	480	212.231	126	192	24	523	481
	phytozome-next.jgi.doe.gov/report/protein/Ghirsutum_v2_1/Gohir.D03G009300.1.p	Gohir.D03G009300.1.p	G.hirsutum v2.1	1.94e-61	33	429	+/+	seq.submitted 2021-10-26T21:56:05.345Z UTC	97	508	15	407	209.149	142	220	53	523	429
	phytozome-next.jgi.doe.gov/report/protein/Ghirsutum_v2_1/Gohir.D10G089400.1.p	Gohir.D10G089400.1.p	G.hirsutum v2.1	3.1e-61	33	442	+/+	seq.submitted 2021-10-26T21:56:05.345Z UTC	97	523	134	534	211.846	147	225	56	523	545
	phytozome-next.jgi.doe.gov/report/protein/Ghirsutum_v2_1/Gohir.A05G183375.1.p	Gohir.A05G183375.1.p	G.hirsutum v2.1	4.98e-61	37	333	+/+	seq.submitted 2021-10-26T21:56:05.345Z UTC	98	426	120	447	209.149	122	188	9	523	461
	phytozome-next.jgi.doe.gov/report/protein/Ghirsutum_v2_1/Gohir.A11G175200.1.p	Gohir.A11G175200.1.p	G.hirsutum v2.1	6e-61	33	419	+/+	seq.submitted 2021-10-26T21:56:05.345Z UTC	97	504	141	529	211.075	140	211	41	523	555
	phytozome-next.jgi.doe.gov/report/protein/Ghirsutum_v2_1/Gohir.D09G110600.1.p	Gohir.D09G110600.1.p	G.hirsutum v2.1	1.12e-60	31	419	+/+	seq.submitted 2021-10-26T21:56:05.345Z UTC	98	508	110	497	209.92	130	220	39	523	532
	phytozome-next.jgi.doe.gov/report/protein/Ghirsutum_v2_1/Gohir.A07G123800.2.p	Gohir.A07G123800.2.p	G.hirsutum v2.1	1.34e-60	32	419	+/+	seq.submitted 2021-10-26T21:56:05.345Z UTC	97	508	45	434	207.994	133	218	36	523	465
	phytozome-next.jgi.doe.gov/report/protein/Ghirsutum_v2_1/Gohir.A07G123800.1.p	Gohir.A07G123800.1.p	G.hirsutum v2.1	1.34e-60	32	419	+/+	seq.submitted 2021-10-26T21:56:05.345Z UTC	97	508	45	434	207.994	133	218	36	523	465
	phytozome-next.jgi.doe.gov/report/protein/Ghirsutum_v2_1/Gohir.A02G170800.1.p	Gohir.A02G170800.1.p	G.hirsutum v2.1	1.92e-60	34	423	+/+	seq.submitted 2021-10-26T21:56:05.345Z UTC	97	504	128	516	209.534	142	218	49	523	542
	phytozome-next.jgi.doe.gov/report/protein/Ghirsutum_v2_1/Gohir.A02G111503.2.p	Gohir.A02G111503.2.p	G.hirsutum v2.1	3.26e-60	34	372	+/+	seq.submitted 2021-10-26T21:56:05.345Z UTC	98	465	110	461	207.608	125	197	24	523	491
	Paralogs	Protein/Splice variants	Species	E-value	% identity	Align len	Strands	Query ID	Query from	Query to	Target from	Target to	Bitscore
	1	Gohir.A06G170800.1.p	G.hirsutum v2.1	0	75	522	+/+	seq.submitted 2021-10-26T21:56:05.345Z UTC	1	522	1	518	797.734
		Gohir.A06G170800.2.p	G.hirsutum v2.1	0	73	448	+/+	seq.submitted 2021-10-26T21:56:05.345Z UTC	1	448	1	444	662.529
	2	Gohir.D06G178600.1.p	G.hirsutum v2.1	0	75	522	+/+	seq.submitted 2021-10-26T21:56:05.345Z UTC	1	522	1	518	800.045
		Gohir.D06G178600.2.p	G.hirsutum v2.1	0	74	466	+/+	seq.submitted 2021-10-26T21:56:05.345Z UTC	1	466	1	462	701.434
		Gohir.D06G178600.3.p	G.hirsutum v2.1	0	74	466	+/+	seq.submitted 2021-10-26T21:56:05.345Z UTC	1	466	1	462	701.434

## Sheet: Manihot
	Views	Protein	Species	E-value	% identity	Align len	Strands	Query ID	Query from	Query to	Target from	Target to	Bitscore	# identical	Positives	Gaps	Query len	Target len
	phytozome-next.jgi.doe.gov/report/protein/Mesculenta_v8_1/Manes.10G063500.1.p	Manes.10G063500.1.p	M.esculenta v8.1	0	81	522	+/+	seq.submitted 2021-10-26T21:57:47.530Z UTC	1	522	1	505	857.055	421	460	17	523	508
	phytozome-next.jgi.doe.gov/report/protein/Mesculenta_v8_1/Manes.10G059800.1.p	Manes.10G059800.1.p	M.esculenta v8.1	7.57e-77	37	421	+/+	seq.submitted 2021-10-26T21:57:47.530Z UTC	97	509	161	549	253.447	156	236	40	523	575
	phytozome-next.jgi.doe.gov/report/protein/Mesculenta_v8_1/Manes.02G015100.3.p	Manes.02G015100.3.p	M.esculenta v8.1	1.97e-76	35	417	+/+	seq.submitted 2021-10-26T21:57:47.530Z UTC	97	509	130	519	251.136	145	227	31	523	532
	phytozome-next.jgi.doe.gov/report/protein/Mesculenta_v8_1/Manes.02G138500.1.p	Manes.02G138500.1.p	M.esculenta v8.1	3.71e-76	35	417	+/+	seq.submitted 2021-10-26T21:57:47.530Z UTC	97	509	123	512	250.366	145	228	31	523	529
	phytozome-next.jgi.doe.gov/report/protein/Mesculenta_v8_1/Manes.01G178100.1.p	Manes.01G178100.1.p	M.esculenta v8.1	4.93e-76	35	417	+/+	seq.submitted 2021-10-26T21:57:47.530Z UTC	97	509	123	512	249.98	145	229	31	523	529
	phytozome-next.jgi.doe.gov/report/protein/Mesculenta_v8_1/Manes.18G009700.1.p	Manes.18G009700.1.p	M.esculenta v8.1	1.43e-75	36	437	+/+	seq.submitted 2021-10-26T21:57:47.530Z UTC	82	509	108	517	248.825	157	238	36	523	526
	phytozome-next.jgi.doe.gov/report/protein/Mesculenta_v8_1/Manes.01G050900.2.p	Manes.01G050900.2.p	M.esculenta v8.1	1.93e-75	34	438	+/+	seq.submitted 2021-10-26T21:57:47.530Z UTC	79	509	107	517	248.44	149	237	34	523	530
	phytozome-next.jgi.doe.gov/report/protein/Mesculenta_v8_1/Manes.13G153100.1.p	Manes.13G153100.1.p	M.esculenta v8.1	3.04e-75	37	421	+/+	seq.submitted 2021-10-26T21:57:47.530Z UTC	97	509	84	472	247.284	156	225	40	523	504
	phytozome-next.jgi.doe.gov/report/protein/Mesculenta_v8_1/Manes.08G036300.1.p	Manes.08G036300.1.p	M.esculenta v8.1	1.71e-74	36	420	+/+	seq.submitted 2021-10-26T21:57:47.530Z UTC	97	508	346	733	251.521	152	229	40	523	756
	phytozome-next.jgi.doe.gov/report/protein/Mesculenta_v8_1/Manes.08G037300.9.p	Manes.08G037300.9.p	M.esculenta v8.1	5.62e-74	35	418	+/+	seq.submitted 2021-10-26T21:57:47.530Z UTC	97	508	186	573	246.128	148	224	36	523	580
	phytozome-next.jgi.doe.gov/report/protein/Mesculenta_v8_1/Manes.08G037300.7.p	Manes.08G037300.7.p	M.esculenta v8.1	5.62e-74	35	418	+/+	seq.submitted 2021-10-26T21:57:47.530Z UTC	97	508	186	573	246.128	148	224	36	523	580
	phytozome-next.jgi.doe.gov/report/protein/Mesculenta_v8_1/Manes.08G037300.6.p	Manes.08G037300.6.p	M.esculenta v8.1	5.62e-74	35	418	+/+	seq.submitted 2021-10-26T21:57:47.530Z UTC	97	508	186	573	246.128	148	224	36	523	580
	phytozome-next.jgi.doe.gov/report/protein/Mesculenta_v8_1/Manes.08G037300.8.p	Manes.08G037300.8.p	M.esculenta v8.1	5.62e-74	35	418	+/+	seq.submitted 2021-10-26T21:57:47.530Z UTC	97	508	186	573	246.128	148	224	36	523	580
	phytozome-next.jgi.doe.gov/report/protein/Mesculenta_v8_1/Manes.12G081500.1.p	Manes.12G081500.1.p	M.esculenta v8.1	2.23e-73	36	417	+/+	seq.submitted 2021-10-26T21:57:47.530Z UTC	97	509	83	471	242.276	150	226	32	523	503
	phytozome-next.jgi.doe.gov/report/protein/Mesculenta_v8_1/Manes.18G101000.1.p	Manes.18G101000.1.p	M.esculenta v8.1	1.51e-72	36	418	+/+	seq.submitted 2021-10-26T21:57:47.530Z UTC	97	510	80	469	239.965	152	224	32	523	502
	phytozome-next.jgi.doe.gov/report/protein/Mesculenta_v8_1/Manes.15G071600.3.p	Manes.15G071600.3.p	M.esculenta v8.1	3.2e-71	33	422	+/+	seq.submitted 2021-10-26T21:57:47.530Z UTC	97	514	134	528	237.269	140	224	31	523	533
	phytozome-next.jgi.doe.gov/report/protein/Mesculenta_v8_1/Manes.15G071600.4.p	Manes.15G071600.4.p	M.esculenta v8.1	3.2e-71	33	422	+/+	seq.submitted 2021-10-26T21:57:47.530Z UTC	97	514	134	528	237.269	140	224	31	523	533
	phytozome-next.jgi.doe.gov/report/protein/Mesculenta_v8_1/Manes.15G071600.1.p	Manes.15G071600.1.p	M.esculenta v8.1	3.2e-71	33	422	+/+	seq.submitted 2021-10-26T21:57:47.530Z UTC	97	514	134	528	237.269	140	224	31	523	533
	phytozome-next.jgi.doe.gov/report/protein/Mesculenta_v8_1/Manes.02G192200.6.p	Manes.02G192200.6.p	M.esculenta v8.1	1.29e-70	37	417	+/+	seq.submitted 2021-10-26T21:57:47.530Z UTC	97	509	86	474	235.343	153	221	32	523	512
	phytozome-next.jgi.doe.gov/report/protein/Mesculenta_v8_1/Manes.02G192200.5.p	Manes.02G192200.5.p	M.esculenta v8.1	1.29e-70	37	417	+/+	seq.submitted 2021-10-26T21:57:47.530Z UTC	97	509	86	474	235.343	153	221	32	523	512
	phytozome-next.jgi.doe.gov/report/protein/Mesculenta_v8_1/Manes.02G192200.8.p	Manes.02G192200.8.p	M.esculenta v8.1	1.29e-70	37	417	+/+	seq.submitted 2021-10-26T21:57:47.530Z UTC	97	509	86	474	235.343	153	221	32	523	512
	phytozome-next.jgi.doe.gov/report/protein/Mesculenta_v8_1/Manes.02G192200.7.p	Manes.02G192200.7.p	M.esculenta v8.1	1.29e-70	37	417	+/+	seq.submitted 2021-10-26T21:57:47.530Z UTC	97	509	86	474	235.343	153	221	32	523	512
	phytozome-next.jgi.doe.gov/report/protein/Mesculenta_v8_1/Manes.03G129500.1.p	Manes.03G129500.1.p	M.esculenta v8.1	3.87e-70	33	422	+/+	seq.submitted 2021-10-26T21:57:47.530Z UTC	97	514	136	530	234.572	140	225	31	523	535
	phytozome-next.jgi.doe.gov/report/protein/Mesculenta_v8_1/Manes.16G007500.1.p	Manes.16G007500.1.p	M.esculenta v8.1	1.58e-68	34	418	+/+	seq.submitted 2021-10-26T21:57:47.530Z UTC	97	508	150	538	230.72	144	222	35	523	548
	phytozome-next.jgi.doe.gov/report/protein/Mesculenta_v8_1/Manes.09G041801.1.p	Manes.09G041801.1.p	M.esculenta v8.1	2.34e-68	35	415	+/+	seq.submitted 2021-10-26T21:57:47.530Z UTC	97	503	188	570	231.106	145	216	40	523	577
	phytozome-next.jgi.doe.gov/report/protein/Mesculenta_v8_1/Manes.15G114600.3.p	Manes.15G114600.3.p	M.esculenta v8.1	3.33e-68	35	424	+/+	seq.submitted 2021-10-26T21:57:47.530Z UTC	97	512	145	536	230.335	150	224	40	523	559
	phytozome-next.jgi.doe.gov/report/protein/Mesculenta_v8_1/Manes.15G114600.2.p	Manes.15G114600.2.p	M.esculenta v8.1	3.33e-68	35	424	+/+	seq.submitted 2021-10-26T21:57:47.530Z UTC	97	512	145	536	230.335	150	224	40	523	559
	phytozome-next.jgi.doe.gov/report/protein/Mesculenta_v8_1/Manes.03G097300.3.p	Manes.03G097300.3.p	M.esculenta v8.1	1.32e-67	35	421	+/+	seq.submitted 2021-10-26T21:57:47.530Z UTC	97	509	145	533	228.409	149	222	40	523	559
	phytozome-next.jgi.doe.gov/report/protein/Mesculenta_v8_1/Manes.03G097300.3.p	Manes.03G097300.3.p	M.esculenta v8.1	0.0629	41	44	+/+	seq.submitted 2021-10-26T21:57:47.530Z UTC	479	521	397	440	36.965	18	28	1	523	559
	phytozome-next.jgi.doe.gov/report/protein/Mesculenta_v8_1/Manes.03G097300.4.p	Manes.03G097300.4.p	M.esculenta v8.1	1.32e-67	35	421	+/+	seq.submitted 2021-10-26T21:57:47.530Z UTC	97	509	145	533	228.409	149	222	40	523	559
	phytozome-next.jgi.doe.gov/report/protein/Mesculenta_v8_1/Manes.03G097300.4.p	Manes.03G097300.4.p	M.esculenta v8.1	0.0629	41	44	+/+	seq.submitted 2021-10-26T21:57:47.530Z UTC	479	521	397	440	36.965	18	28	1	523	559
	phytozome-next.jgi.doe.gov/report/protein/Mesculenta_v8_1/Manes.03G097300.1.p	Manes.03G097300.1.p	M.esculenta v8.1	1.32e-67	35	421	+/+	seq.submitted 2021-10-26T21:57:47.530Z UTC	97	509	145	533	228.409	149	222	40	523	559
	phytozome-next.jgi.doe.gov/report/protein/Mesculenta_v8_1/Manes.03G097300.1.p	Manes.03G097300.1.p	M.esculenta v8.1	0.0629	41	44	+/+	seq.submitted 2021-10-26T21:57:47.530Z UTC	479	521	397	440	36.965	18	28	1	523	559
	phytozome-next.jgi.doe.gov/report/protein/Mesculenta_v8_1/Manes.03G097300.2.p	Manes.03G097300.2.p	M.esculenta v8.1	1.32e-67	35	421	+/+	seq.submitted 2021-10-26T21:57:47.530Z UTC	97	509	145	533	228.409	149	222	40	523	559
	phytozome-next.jgi.doe.gov/report/protein/Mesculenta_v8_1/Manes.03G097300.2.p	Manes.03G097300.2.p	M.esculenta v8.1	0.0629	41	44	+/+	seq.submitted 2021-10-26T21:57:47.530Z UTC	479	521	397	440	36.965	18	28	1	523	559
	phytozome-next.jgi.doe.gov/report/protein/Mesculenta_v8_1/Manes.06G163700.4.p	Manes.06G163700.4.p	M.esculenta v8.1	1.49e-66	34	391	+/+	seq.submitted 2021-10-26T21:57:47.530Z UTC	98	467	116	505	225.328	134	209	22	523	539
	phytozome-next.jgi.doe.gov/report/protein/Mesculenta_v8_1/Manes.06G163700.5.p	Manes.06G163700.5.p	M.esculenta v8.1	1.49e-66	34	391	+/+	seq.submitted 2021-10-26T21:57:47.530Z UTC	98	467	116	505	225.328	134	209	22	523	539
	phytozome-next.jgi.doe.gov/report/protein/Mesculenta_v8_1/Manes.06G163700.3.p	Manes.06G163700.3.p	M.esculenta v8.1	1.49e-66	34	391	+/+	seq.submitted 2021-10-26T21:57:47.530Z UTC	98	467	116	505	225.328	134	209	22	523	539
	phytozome-next.jgi.doe.gov/report/protein/Mesculenta_v8_1/Manes.06G163700.6.p	Manes.06G163700.6.p	M.esculenta v8.1	1.49e-66	34	391	+/+	seq.submitted 2021-10-26T21:57:47.530Z UTC	98	467	116	505	225.328	134	209	22	523	539
	phytozome-next.jgi.doe.gov/report/protein/Mesculenta_v8_1/Manes.09G106000.2.p	Manes.09G106000.2.p	M.esculenta v8.1	7.63e-66	33	421	+/+	seq.submitted 2021-10-26T21:57:47.530Z UTC	91	508	101	492	223.016	138	224	32	523	528
	phytozome-next.jgi.doe.gov/report/protein/Mesculenta_v8_1/Manes.08G092800.1.p	Manes.08G092800.1.p	M.esculenta v8.1	1.87e-65	33	421	+/+	seq.submitted 2021-10-26T21:57:47.530Z UTC	91	508	101	492	222.246	137	223	32	523	528
	phytozome-next.jgi.doe.gov/report/protein/Mesculenta_v8_1/Manes.09G024500.1.p	Manes.09G024500.1.p	M.esculenta v8.1	4.04e-65	31	416	+/+	seq.submitted 2021-10-26T21:57:47.530Z UTC	97	508	105	494	221.09	131	218	30	523	532
	phytozome-next.jgi.doe.gov/report/protein/Mesculenta_v8_1/Manes.09G024500.2.p	Manes.09G024500.2.p	M.esculenta v8.1	4.04e-65	31	416	+/+	seq.submitted 2021-10-26T21:57:47.530Z UTC	97	508	105	494	221.09	131	218	30	523	532
	phytozome-next.jgi.doe.gov/report/protein/Mesculenta_v8_1/Manes.08G049500.1.p	Manes.08G049500.1.p	M.esculenta v8.1	3.84e-64	33	418	+/+	seq.submitted 2021-10-26T21:57:47.530Z UTC	97	508	105	494	218.779	136	223	34	523	532
	phytozome-next.jgi.doe.gov/report/protein/Mesculenta_v8_1/Manes.14G003300.3.p	Manes.14G003300.3.p	M.esculenta v8.1	3.97e-64	33	394	+/+	seq.submitted 2021-10-26T21:57:47.530Z UTC	98	467	113	502	218.779	131	209	28	523	536
	phytozome-next.jgi.doe.gov/report/protein/Mesculenta_v8_1/Manes.14G003300.5.p	Manes.14G003300.5.p	M.esculenta v8.1	3.97e-64	33	394	+/+	seq.submitted 2021-10-26T21:57:47.530Z UTC	98	467	113	502	218.779	131	209	28	523	536
	phytozome-next.jgi.doe.gov/report/protein/Mesculenta_v8_1/Manes.14G073800.1.p	Manes.14G073800.1.p	M.esculenta v8.1	7.66e-63	34	420	+/+	seq.submitted 2021-10-26T21:57:47.530Z UTC	91	508	115	506	215.698	142	216	30	523	550
	phytozome-next.jgi.doe.gov/report/protein/Mesculenta_v8_1/Manes.01G050900.3.p	Manes.01G050900.3.p	M.esculenta v8.1	1.34e-62	38	321	+/+	seq.submitted 2021-10-26T21:57:47.530Z UTC	79	395	107	406	211.846	123	185	25	523	433
	phytozome-next.jgi.doe.gov/report/protein/Mesculenta_v8_1/Manes.04G041600.1.p	Manes.04G041600.1.p	M.esculenta v8.1	8.15e-59	31	425	+/+	seq.submitted 2021-10-26T21:57:47.530Z UTC	91	508	111	503	204.527	130	212	39	523	538
	phytozome-next.jgi.doe.gov/report/protein/Mesculenta_v8_1/Manes.01G145800.1.p	Manes.01G145800.1.p	M.esculenta v8.1	1.94e-58	33	423	+/+	seq.submitted 2021-10-26T21:57:47.530Z UTC	97	504	169	557	204.527	138	218	49	523	583
	phytozome-next.jgi.doe.gov/report/protein/Mesculenta_v8_1/Manes.01G145800.1.p	Manes.01G145800.1.p	M.esculenta v8.1	0.00798	45	66	+/+	seq.submitted 2021-10-26T21:57:47.530Z UTC	441	506	427	487	40.0466	30	36	5	523	583
	phytozome-next.jgi.doe.gov/report/protein/Mesculenta_v8_1/Manes.02G104800.1.p	Manes.02G104800.1.p	M.esculenta v8.1	5.53e-56	31	423	+/+	seq.submitted 2021-10-26T21:57:47.530Z UTC	97	504	155	543	197.593	132	216	49	523	569
	phytozome-next.jgi.doe.gov/report/protein/Mesculenta_v8_1/Manes.02G104800.1.p	Manes.02G104800.1.p	M.esculenta v8.1	0.0233	44	66	+/+	seq.submitted 2021-10-26T21:57:47.530Z UTC	441	506	413	473	38.5058	29	36	5	523	569
	phytozome-next.jgi.doe.gov/report/protein/Mesculenta_v8_1/Manes.11G118400.1.p	Manes.11G118400.1.p	M.esculenta v8.1	6.48e-56	31	424	+/+	seq.submitted 2021-10-26T21:57:47.530Z UTC	95	508	98	493	196.438	130	209	38	523	529
	phytozome-next.jgi.doe.gov/report/protein/Mesculenta_v8_1/Manes.09G041701.1.p	Manes.09G041701.1.p	M.esculenta v8.1	1.15e-50	40	221	+/+	seq.submitted 2021-10-26T21:57:47.530Z UTC	88	308	123	338	177.948	89	136	5	523	350
	phytozome-next.jgi.doe.gov/report/protein/Mesculenta_v8_1/Manes.15G142700.1.p	Manes.15G142700.1.p	M.esculenta v8.1	5.42e-49	31	416	+/+	seq.submitted 2021-10-26T21:57:47.530Z UTC	97	503	190	575	179.104	131	213	39	523	592
	phytozome-next.jgi.doe.gov/report/protein/Mesculenta_v8_1/Manes.15G040400.1.p	Manes.15G040400.1.p	M.esculenta v8.1	6.74e-49	39	228	+/+	seq.submitted 2021-10-26T21:57:47.530Z UTC	79	306	42	266	170.629	88	139	3	523	272
	phytozome-next.jgi.doe.gov/report/protein/Mesculenta_v8_1/Manes.15G142700.2.p	Manes.15G142700.2.p	M.esculenta v8.1	5.09e-48	35	291	+/+	seq.submitted 2021-10-26T21:57:47.530Z UTC	97	380	190	476	174.481	103	163	11	523	494
	phytozome-next.jgi.doe.gov/report/protein/Mesculenta_v8_1/Manes.14G030000.1.p	Manes.14G030000.1.p	M.esculenta v8.1	1.09e-47	40	225	+/+	seq.submitted 2021-10-26T21:57:47.530Z UTC	91	315	94	313	174.096	91	128	5	523	523
	phytozome-next.jgi.doe.gov/report/protein/Mesculenta_v8_1/Manes.01G068100.7.p	Manes.01G068100.7.p	M.esculenta v8.1	2.07e-47	41	217	+/+	seq.submitted 2021-10-26T21:57:47.530Z UTC	91	307	90	301	173.326	89	130	5	523	517
	phytozome-next.jgi.doe.gov/report/protein/Mesculenta_v8_1/Manes.01G068100.5.p	Manes.01G068100.5.p	M.esculenta v8.1	2.07e-47	41	217	+/+	seq.submitted 2021-10-26T21:57:47.530Z UTC	91	307	90	301	173.326	89	130	5	523	517
	phytozome-next.jgi.doe.gov/report/protein/Mesculenta_v8_1/Manes.01G068100.6.p	Manes.01G068100.6.p	M.esculenta v8.1	2.17e-47	41	217	+/+	seq.submitted 2021-10-26T21:57:47.530Z UTC	91	307	90	301	173.326	89	130	5	523	519
	phytozome-next.jgi.doe.gov/report/protein/Mesculenta_v8_1/Manes.01G068100.3.p	Manes.01G068100.3.p	M.esculenta v8.1	2.17e-47	41	217	+/+	seq.submitted 2021-10-26T21:57:47.530Z UTC	91	307	90	301	173.326	89	130	5	523	519
	phytozome-next.jgi.doe.gov/report/protein/Mesculenta_v8_1/Manes.09G003500.1.p	Manes.09G003500.1.p	M.esculenta v8.1	6.62e-47	31	375	+/+	seq.submitted 2021-10-26T21:57:47.530Z UTC	97	469	176	537	172.94	117	191	15	523	577
	phytozome-next.jgi.doe.gov/report/protein/Mesculenta_v8_1/Manes.06G142800.5.p	Manes.06G142800.5.p	M.esculenta v8.1	6.98e-47	35	303	+/+	seq.submitted 2021-10-26T21:57:47.530Z UTC	5	307	35	301	171.785	105	150	36	523	520
	phytozome-next.jgi.doe.gov/report/protein/Mesculenta_v8_1/Manes.06G142800.4.p	Manes.06G142800.4.p	M.esculenta v8.1	6.98e-47	35	303	+/+	seq.submitted 2021-10-26T21:57:47.530Z UTC	5	307	35	301	171.785	105	150	36	523	520
	phytozome-next.jgi.doe.gov/report/protein/Mesculenta_v8_1/Manes.13G126000.1.p	Manes.13G126000.1.p	M.esculenta v8.1	2.74e-46	32	382	+/+	seq.submitted 2021-10-26T21:57:47.530Z UTC	97	469	229	590	172.17	123	194	29	523	631
	phytozome-next.jgi.doe.gov/report/protein/Mesculenta_v8_1/Manes.05G191100.1.p	Manes.05G191100.1.p	M.esculenta v8.1	8.15e-46	31	369	+/+	seq.submitted 2021-10-26T21:57:47.530Z UTC	97	462	186	538	170.244	113	193	19	523	585
	phytozome-next.jgi.doe.gov/report/protein/Mesculenta_v8_1/Manes.05G191100.5.p	Manes.05G191100.5.p	M.esculenta v8.1	1.05e-45	33	312	+/+	seq.submitted 2021-10-26T21:57:47.530Z UTC	97	407	186	492	168.318	102	171	6	523	496
	phytozome-next.jgi.doe.gov/report/protein/Mesculenta_v8_1/Manes.17G094100.3.p	Manes.17G094100.3.p	M.esculenta v8.1	1.57e-45	30	429	+/+	seq.submitted 2021-10-26T21:57:47.530Z UTC	97	512	124	518	168.318	128	208	47	523	526
	phytozome-next.jgi.doe.gov/report/protein/Mesculenta_v8_1/Manes.08G060300.3.p	Manes.08G060300.3.p	M.esculenta v8.1	1.94e-45	37	246	+/+	seq.submitted 2021-10-26T21:57:47.530Z UTC	97	341	176	420	168.703	92	143	2	523	556
	phytozome-next.jgi.doe.gov/report/protein/Mesculenta_v8_1/Manes.18G062200.12.p	Manes.18G062200.12.p	M.esculenta v8.1	1.95e-45	40	223	+/+	seq.submitted 2021-10-26T21:57:47.530Z UTC	86	306	138	356	166.777	90	131	6	523	473
	phytozome-next.jgi.doe.gov/report/protein/Mesculenta_v8_1/Manes.18G062200.16.p	Manes.18G062200.16.p	M.esculenta v8.1	1.95e-45	40	223	+/+	seq.submitted 2021-10-26T21:57:47.530Z UTC	86	306	138	356	166.777	90	131	6	523	473
	phytozome-next.jgi.doe.gov/report/protein/Mesculenta_v8_1/Manes.18G062200.13.p	Manes.18G062200.13.p	M.esculenta v8.1	1.95e-45	40	223	+/+	seq.submitted 2021-10-26T21:57:47.530Z UTC	86	306	138	356	166.777	90	131	6	523	473
	phytozome-next.jgi.doe.gov/report/protein/Mesculenta_v8_1/Manes.18G062200.14.p	Manes.18G062200.14.p	M.esculenta v8.1	1.95e-45	40	223	+/+	seq.submitted 2021-10-26T21:57:47.530Z UTC	86	306	138	356	166.777	90	131	6	523	473
	phytozome-next.jgi.doe.gov/report/protein/Mesculenta_v8_1/Manes.18G062200.17.p	Manes.18G062200.17.p	M.esculenta v8.1	1.95e-45	40	223	+/+	seq.submitted 2021-10-26T21:57:47.530Z UTC	86	306	138	356	166.777	90	131	6	523	473
	phytozome-next.jgi.doe.gov/report/protein/Mesculenta_v8_1/Manes.18G062200.15.p	Manes.18G062200.15.p	M.esculenta v8.1	1.95e-45	40	223	+/+	seq.submitted 2021-10-26T21:57:47.530Z UTC	86	306	138	356	166.777	90	131	6	523	473
	phytozome-next.jgi.doe.gov/report/protein/Mesculenta_v8_1/Manes.10G102300.3.p	Manes.10G102300.3.p	M.esculenta v8.1	2.57e-45	37	274	+/+	seq.submitted 2021-10-26T21:57:47.530Z UTC	50	306	81	350	166.392	102	153	21	523	466
	phytozome-next.jgi.doe.gov/report/protein/Mesculenta_v8_1/Manes.10G102300.2.p	Manes.10G102300.2.p	M.esculenta v8.1	2.57e-45	37	274	+/+	seq.submitted 2021-10-26T21:57:47.530Z UTC	50	306	81	350	166.392	102	153	21	523	466
	phytozome-next.jgi.doe.gov/report/protein/Mesculenta_v8_1/Manes.08G060300.5.p	Manes.08G060300.5.p	M.esculenta v8.1	2.59e-45	37	246	+/+	seq.submitted 2021-10-26T21:57:47.530Z UTC	97	341	176	420	168.703	92	143	2	523	577
	phytozome-next.jgi.doe.gov/report/protein/Mesculenta_v8_1/Manes.08G060300.4.p	Manes.08G060300.4.p	M.esculenta v8.1	2.59e-45	37	246	+/+	seq.submitted 2021-10-26T21:57:47.530Z UTC	97	341	176	420	168.703	92	143	2	523	577
	phytozome-next.jgi.doe.gov/report/protein/Mesculenta_v8_1/Manes.05G018400.3.p	Manes.05G018400.3.p	M.esculenta v8.1	5.12e-45	31	332	+/+	seq.submitted 2021-10-26T21:57:47.530Z UTC	97	425	204	520	167.548	103	186	18	523	568
	phytozome-next.jgi.doe.gov/report/protein/Mesculenta_v8_1/Manes.02G147900.4.p	Manes.02G147900.4.p	M.esculenta v8.1	2.62e-44	40	223	+/+	seq.submitted 2021-10-26T21:57:47.530Z UTC	86	306	139	357	163.696	89	130	6	523	474
	phytozome-next.jgi.doe.gov/report/protein/Mesculenta_v8_1/Manes.08G060300.2.p	Manes.08G060300.2.p	M.esculenta v8.1	3.08e-44	40	222	+/+	seq.submitted 2021-10-26T21:57:47.530Z UTC	97	317	176	396	165.236	89	132	2	523	563
	phytozome-next.jgi.doe.gov/report/protein/Mesculenta_v8_1/Manes.12G102000.1.p	Manes.12G102000.1.p	M.esculenta v8.1	1.89e-43	37	246	+/+	seq.submitted 2021-10-26T21:57:47.530Z UTC	97	341	229	473	164.081	91	140	2	523	631
	phytozome-next.jgi.doe.gov/report/protein/Mesculenta_v8_1/Manes.01G241800.1.p	Manes.01G241800.1.p	M.esculenta v8.1	3.77e-43	30	391	+/+	seq.submitted 2021-10-26T21:57:47.530Z UTC	98	469	205	564	162.925	119	198	50	523	604
	phytozome-next.jgi.doe.gov/report/protein/Mesculenta_v8_1/Manes.14G073800.2.p	Manes.14G073800.2.p	M.esculenta v8.1	5.7e-43	30	420	+/+	seq.submitted 2021-10-26T21:57:47.530Z UTC	91	508	115	458	160.614	126	190	78	523	502
	phytozome-next.jgi.doe.gov/report/protein/Mesculenta_v8_1/Manes.08G138300.1.p	Manes.08G138300.1.p	M.esculenta v8.1	6.48e-43	36	211	+/+	seq.submitted 2021-10-26T21:57:47.530Z UTC	97	306	59	266	154.836	76	130	4	523	277
	phytozome-next.jgi.doe.gov/report/protein/Mesculenta_v8_1/Manes.01G241800.2.p	Manes.01G241800.2.p	M.esculenta v8.1	7.18e-43	30	384	+/+	seq.submitted 2021-10-26T21:57:47.530Z UTC	98	462	205	557	161.77	117	196	50	523	576
	phytozome-next.jgi.doe.gov/report/protein/Mesculenta_v8_1/Manes.05G191100.2.p	Manes.05G191100.2.p	M.esculenta v8.1	1.24e-42	30	381	+/+	seq.submitted 2021-10-26T21:57:47.530Z UTC	97	462	186	550	161.384	113	193	31	523	597
	phytozome-next.jgi.doe.gov/report/protein/Mesculenta_v8_1/Manes.05G191100.4.p	Manes.05G191100.4.p	M.esculenta v8.1	1.79e-42	31	324	+/+	seq.submitted 2021-10-26T21:57:47.530Z UTC	97	407	186	504	159.458	102	171	18	523	508
	phytozome-next.jgi.doe.gov/report/protein/Mesculenta_v8_1/Manes.03G164500.1.p	Manes.03G164500.1.p	M.esculenta v8.1	2.76e-42	35	229	+/+	seq.submitted 2021-10-26T21:57:47.530Z UTC	79	306	42	267	152.91	81	135	4	523	273
	phytozome-next.jgi.doe.gov/report/protein/Mesculenta_v8_1/Manes.05G018400.1.p	Manes.05G018400.1.p	M.esculenta v8.1	9e-42	29	380	+/+	seq.submitted 2021-10-26T21:57:47.530Z UTC	97	469	204	564	159.073	109	196	26	523	604
	phytozome-next.jgi.doe.gov/report/protein/Mesculenta_v8_1/Manes.09G148600.1.p	Manes.09G148600.1.p	M.esculenta v8.1	4.01e-40	34	222	+/+	seq.submitted 2021-10-26T21:57:47.530Z UTC	97	317	59	276	147.517	75	134	5	523	277
	phytozome-next.jgi.doe.gov/report/protein/Mesculenta_v8_1/Manes.05G017700.1.p	Manes.05G017700.1.p	M.esculenta v8.1	7.97e-35	37	239	+/+	seq.submitted 2021-10-26T21:57:47.530Z UTC	88	320	62	288	136.732	88	126	18	523	446
	phytozome-next.jgi.doe.gov/report/protein/Mesculenta_v8_1/Manes.01G100900.2.p	Manes.01G100900.2.p	M.esculenta v8.1	2.85e-34	34	268	+/+	seq.submitted 2021-10-26T21:57:47.530Z UTC	72	318	24	283	134.42	91	139	29	523	404
	phytozome-next.jgi.doe.gov/report/protein/Mesculenta_v8_1/Manes.03G009600.1.p	Manes.03G009600.1.p	M.esculenta v8.1	9.74e-34	31	400	+/+	seq.submitted 2021-10-26T21:57:47.530Z UTC	8	398	7	358	134.035	123	187	57	523	449
	phytozome-next.jgi.doe.gov/report/protein/Mesculenta_v8_1/Manes.13G087500.1.p	Manes.13G087500.1.p	M.esculenta v8.1	1.33e-33	36	206	+/+	seq.submitted 2021-10-26T21:57:47.530Z UTC	105	309	116	321	130.954	75	111	1	523	330
	phytozome-next.jgi.doe.gov/report/protein/Mesculenta_v8_1/Manes.01G100900.1.p	Manes.01G100900.1.p	M.esculenta v8.1	1.89e-33	34	268	+/+	seq.submitted 2021-10-26T21:57:47.530Z UTC	72	318	24	283	134.035	91	139	29	523	516
	phytozome-next.jgi.doe.gov/report/protein/Mesculenta_v8_1/Manes.03G211800.1.p	Manes.03G211800.1.p	M.esculenta v8.1	1.98e-33	35	283	+/+	seq.submitted 2021-10-26T21:57:47.530Z UTC	54	322	23	285	132.88	99	148	34	523	432
	phytozome-next.jgi.doe.gov/report/protein/Mesculenta_v8_1/Manes.18G139760.1.p	Manes.18G139760.1.p	M.esculenta v8.1	2.85e-33	36	244	+/+	seq.submitted 2021-10-26T21:57:47.530Z UTC	86	322	57	287	132.109	88	133	20	523	433
	phytozome-next.jgi.doe.gov/report/protein/Mesculenta_v8_1/Manes.01G241100.1.p	Manes.01G241100.1.p	M.esculenta v8.1	3.23e-33	36	242	+/+	seq.submitted 2021-10-26T21:57:47.530Z UTC	88	317	60	289	132.109	88	124	24	523	438
	phytozome-next.jgi.doe.gov/report/protein/Mesculenta_v8_1/Manes.02G049300.1.p	Manes.02G049300.1.p	M.esculenta v8.1	3.43e-33	34	268	+/+	seq.submitted 2021-10-26T21:57:47.530Z UTC	72	318	24	283	133.265	90	139	29	523	516
	phytozome-next.jgi.doe.gov/report/protein/Mesculenta_v8_1/Manes.02G049300.2.p	Manes.02G049300.2.p	M.esculenta v8.1	3.7e-33	38	216	+/+	seq.submitted 2021-10-26T21:57:47.530Z UTC	105	318	76	283	132.88	82	120	10	523	481
	phytozome-next.jgi.doe.gov/report/protein/Mesculenta_v8_1/Manes.17G073900.1.p	Manes.17G073900.1.p	M.esculenta v8.1	3.82e-33	32	310	+/+	seq.submitted 2021-10-26T21:57:47.530Z UTC	4	307	10	274	132.494	98	152	51	523	464
	phytozome-next.jgi.doe.gov/report/protein/Mesculenta_v8_1/Manes.08G173400.1.p	Manes.08G173400.1.p	M.esculenta v8.1	5.1e-33	38	221	+/+	seq.submitted 2021-10-26T21:57:47.530Z UTC	91	307	79	286	131.724	84	120	17	523	446
	Paralogs	Protein/Splice variants	Species	E-value	% identity	Align len	Strands	Query ID	Query from	Query to	Target from	Target to	Bitscore
	1	Manes.10G063500.1.p	M.esculenta v8.1	0	81	522	+/+	seq.submitted 2021-10-26T21:57:47.530Z UTC	1	522	1	505	857.055

## Sheet: Zea
	Views	Protein	Species	E-value	% identity	Align len	Strands	Query ID	Query from	Query to	Target from	Target to	Bitscore	# identical	Positives	Gaps	Query len	Target len
	phytozome-next.jgi.doe.gov/report/protein/Zmays_RefGen_V4/Zm00001d052944_P001	Zm00001d052944_P001	Z.mays RefGen_V4	0	69	521	+/+	seq.submitted 2021-10-26T21:58:54.283Z UTC	5	522	6	523	726.857	359	424	6	523	529
	phytozome-next.jgi.doe.gov/report/protein/Zmays_RefGen_V4/Zm00001d019620_P001	Zm00001d019620_P001	Z.mays RefGen_V4	2.6e-125	68	268	+/+	seq.submitted 2021-10-26T21:58:54.283Z UTC	255	522	103	370	372.859	183	224	0	523	376
	phytozome-next.jgi.doe.gov/report/protein/Zmays_RefGen_V4/Zm00001d009708_P001	Zm00001d009708_P001	Z.mays RefGen_V4	8.22e-77	36	423	+/+	seq.submitted 2021-10-26T21:58:54.283Z UTC	97	511	137	528	253.447	151	233	39	523	540
	phytozome-next.jgi.doe.gov/report/protein/Zmays_RefGen_V4/Zm00001d034372_P002	Zm00001d034372_P002	Z.mays RefGen_V4	8.75e-77	37	421	+/+	seq.submitted 2021-10-26T21:58:54.283Z UTC	97	509	193	581	254.988	157	235	40	523	609
	phytozome-next.jgi.doe.gov/report/protein/Zmays_RefGen_V4/Zm00001d043150_P007	Zm00001d043150_P007	Z.mays RefGen_V4	1.12e-76	35	435	+/+	seq.submitted 2021-10-26T21:58:54.283Z UTC	97	518	116	520	252.292	153	230	43	523	521
	phytozome-next.jgi.doe.gov/report/protein/Zmays_RefGen_V4/Zm00001d043150_P002	Zm00001d043150_P002	Z.mays RefGen_V4	1.12e-76	35	435	+/+	seq.submitted 2021-10-26T21:58:54.283Z UTC	97	518	116	520	252.292	153	230	43	523	521
	phytozome-next.jgi.doe.gov/report/protein/Zmays_RefGen_V4/Zm00001d043150_P004	Zm00001d043150_P004	Z.mays RefGen_V4	1.12e-76	35	435	+/+	seq.submitted 2021-10-26T21:58:54.283Z UTC	97	518	116	520	252.292	153	230	43	523	521
	phytozome-next.jgi.doe.gov/report/protein/Zmays_RefGen_V4/Zm00001d034372_P001	Zm00001d034372_P001	Z.mays RefGen_V4	4.43e-76	37	425	+/+	seq.submitted 2021-10-26T21:58:54.283Z UTC	97	509	193	585	253.447	157	235	44	523	613
	phytozome-next.jgi.doe.gov/report/protein/Zmays_RefGen_V4/Zm00001d012552_P006	Zm00001d012552_P006	Z.mays RefGen_V4	6.3e-76	35	437	+/+	seq.submitted 2021-10-26T21:58:54.283Z UTC	97	518	116	520	250.366	152	235	47	523	521
	phytozome-next.jgi.doe.gov/report/protein/Zmays_RefGen_V4/Zm00001d012552_P005	Zm00001d012552_P005	Z.mays RefGen_V4	6.3e-76	35	437	+/+	seq.submitted 2021-10-26T21:58:54.283Z UTC	97	518	116	520	250.366	152	235	47	523	521
	phytozome-next.jgi.doe.gov/report/protein/Zmays_RefGen_V4/Zm00001d012552_P002	Zm00001d012552_P002	Z.mays RefGen_V4	6.3e-76	35	437	+/+	seq.submitted 2021-10-26T21:58:54.283Z UTC	97	518	116	520	250.366	152	235	47	523	521
	phytozome-next.jgi.doe.gov/report/protein/Zmays_RefGen_V4/Zm00001d011392_P001	Zm00001d011392_P001	Z.mays RefGen_V4	8.49e-76	35	419	+/+	seq.submitted 2021-10-26T21:58:54.283Z UTC	97	511	128	519	250.366	145	230	31	523	531
	phytozome-next.jgi.doe.gov/report/protein/Zmays_RefGen_V4/Zm00001d011392_P003	Zm00001d011392_P003	Z.mays RefGen_V4	8.49e-76	35	419	+/+	seq.submitted 2021-10-26T21:58:54.283Z UTC	97	511	128	519	250.366	145	230	31	523	531
	phytozome-next.jgi.doe.gov/report/protein/Zmays_RefGen_V4/Zm00001d011392_P002	Zm00001d011392_P002	Z.mays RefGen_V4	8.49e-76	35	419	+/+	seq.submitted 2021-10-26T21:58:54.283Z UTC	97	511	128	519	250.366	145	230	31	523	531
	phytozome-next.jgi.doe.gov/report/protein/Zmays_RefGen_V4/Zm00001d040996_P005	Zm00001d040996_P005	Z.mays RefGen_V4	1.99e-74	36	424	+/+	seq.submitted 2021-10-26T21:58:54.283Z UTC	97	512	147	538	247.669	151	235	40	523	562
	phytozome-next.jgi.doe.gov/report/protein/Zmays_RefGen_V4/Zm00001d013109_P003	Zm00001d013109_P003	Z.mays RefGen_V4	2.45e-74	37	421	+/+	seq.submitted 2021-10-26T21:58:54.283Z UTC	97	509	194	582	248.44	155	232	40	523	610
	phytozome-next.jgi.doe.gov/report/protein/Zmays_RefGen_V4/Zm00001d013109_P002	Zm00001d013109_P002	Z.mays RefGen_V4	3.3e-74	37	421	+/+	seq.submitted 2021-10-26T21:58:54.283Z UTC	97	509	205	593	248.44	155	232	40	523	621
	phytozome-next.jgi.doe.gov/report/protein/Zmays_RefGen_V4/Zm00001d040996_P003	Zm00001d040996_P003	Z.mays RefGen_V4	7.34e-74	36	424	+/+	seq.submitted 2021-10-26T21:58:54.283Z UTC	97	512	195	586	247.284	151	235	40	523	610
	phytozome-next.jgi.doe.gov/report/protein/Zmays_RefGen_V4/Zm00001d044185_P005	Zm00001d044185_P005	Z.mays RefGen_V4	1.68e-73	34	419	+/+	seq.submitted 2021-10-26T21:58:54.283Z UTC	97	511	122	513	244.202	143	227	31	523	525
	phytozome-next.jgi.doe.gov/report/protein/Zmays_RefGen_V4/Zm00001d044185_P004	Zm00001d044185_P004	Z.mays RefGen_V4	1.68e-73	34	419	+/+	seq.submitted 2021-10-26T21:58:54.283Z UTC	97	511	122	513	244.202	143	227	31	523	525
	phytozome-next.jgi.doe.gov/report/protein/Zmays_RefGen_V4/Zm00001d044185_P006	Zm00001d044185_P006	Z.mays RefGen_V4	1.68e-73	34	419	+/+	seq.submitted 2021-10-26T21:58:54.283Z UTC	97	511	122	513	244.202	143	227	31	523	525
	phytozome-next.jgi.doe.gov/report/protein/Zmays_RefGen_V4/Zm00001d010659_P001	Zm00001d010659_P001	Z.mays RefGen_V4	3.25e-73	35	420	+/+	seq.submitted 2021-10-26T21:58:54.283Z UTC	97	509	115	504	243.432	146	221	37	523	521
	phytozome-next.jgi.doe.gov/report/protein/Zmays_RefGen_V4/Zm00001d053016_P002	Zm00001d053016_P002	Z.mays RefGen_V4	4.06e-73	36	420	+/+	seq.submitted 2021-10-26T21:58:54.283Z UTC	97	512	92	483	242.662	151	223	32	523	509
	phytozome-next.jgi.doe.gov/report/protein/Zmays_RefGen_V4/Zm00001d004812_P008	Zm00001d004812_P008	Z.mays RefGen_V4	5.27e-73	36	418	+/+	seq.submitted 2021-10-26T21:58:54.283Z UTC	97	512	94	485	242.662	149	220	28	523	511
	phytozome-next.jgi.doe.gov/report/protein/Zmays_RefGen_V4/Zm00001d004812_P002	Zm00001d004812_P002	Z.mays RefGen_V4	5.27e-73	36	418	+/+	seq.submitted 2021-10-26T21:58:54.283Z UTC	97	512	94	485	242.662	149	220	28	523	511
	phytozome-next.jgi.doe.gov/report/protein/Zmays_RefGen_V4/Zm00001d004812_P007	Zm00001d004812_P007	Z.mays RefGen_V4	5.27e-73	36	418	+/+	seq.submitted 2021-10-26T21:58:54.283Z UTC	97	512	94	485	242.662	149	220	28	523	511
	phytozome-next.jgi.doe.gov/report/protein/Zmays_RefGen_V4/Zm00001d004812_P006	Zm00001d004812_P006	Z.mays RefGen_V4	5.27e-73	36	418	+/+	seq.submitted 2021-10-26T21:58:54.283Z UTC	97	512	94	485	242.662	149	220	28	523	511
	phytozome-next.jgi.doe.gov/report/protein/Zmays_RefGen_V4/Zm00001d052438_P002	Zm00001d052438_P002	Z.mays RefGen_V4	1.69e-72	34	420	+/+	seq.submitted 2021-10-26T21:58:54.283Z UTC	97	512	142	534	242.276	141	227	31	523	550
	phytozome-next.jgi.doe.gov/report/protein/Zmays_RefGen_V4/Zm00001d052438_P001	Zm00001d052438_P001	Z.mays RefGen_V4	1.69e-72	34	420	+/+	seq.submitted 2021-10-26T21:58:54.283Z UTC	97	512	142	534	242.276	141	227	31	523	550
	phytozome-next.jgi.doe.gov/report/protein/Zmays_RefGen_V4/Zm00001d034376_P004	Zm00001d034376_P004	Z.mays RefGen_V4	1.07e-71	36	415	+/+	seq.submitted 2021-10-26T21:58:54.283Z UTC	99	509	1	383	236.113	149	222	36	523	409
	phytozome-next.jgi.doe.gov/report/protein/Zmays_RefGen_V4/Zm00001d004998_P001	Zm00001d004998_P001	Z.mays RefGen_V4	1.15e-71	34	420	+/+	seq.submitted 2021-10-26T21:58:54.283Z UTC	97	512	145	537	239.965	141	226	31	523	553
	phytozome-next.jgi.doe.gov/report/protein/Zmays_RefGen_V4/Zm00001d004998_P002	Zm00001d004998_P002	Z.mays RefGen_V4	1.15e-71	34	420	+/+	seq.submitted 2021-10-26T21:58:54.283Z UTC	97	512	145	537	239.965	141	226	31	523	553
	phytozome-next.jgi.doe.gov/report/protein/Zmays_RefGen_V4/Zm00001d034376_P005	Zm00001d034376_P005	Z.mays RefGen_V4	2e-71	36	421	+/+	seq.submitted 2021-10-26T21:58:54.283Z UTC	97	509	167	555	240.35	152	226	40	523	581
	phytozome-next.jgi.doe.gov/report/protein/Zmays_RefGen_V4/Zm00001d034376_P001	Zm00001d034376_P001	Z.mays RefGen_V4	2e-71	36	421	+/+	seq.submitted 2021-10-26T21:58:54.283Z UTC	97	509	167	555	240.35	152	226	40	523	581
	phytozome-next.jgi.doe.gov/report/protein/Zmays_RefGen_V4/Zm00001d007912_P003	Zm00001d007912_P003	Z.mays RefGen_V4	2.74e-71	36	421	+/+	seq.submitted 2021-10-26T21:58:54.283Z UTC	97	509	169	557	239.965	150	226	40	523	582
	phytozome-next.jgi.doe.gov/report/protein/Zmays_RefGen_V4/Zm00001d013105_P005	Zm00001d013105_P005	Z.mays RefGen_V4	1.17e-70	36	415	+/+	seq.submitted 2021-10-26T21:58:54.283Z UTC	99	509	1	383	233.417	148	221	36	523	409
	phytozome-next.jgi.doe.gov/report/protein/Zmays_RefGen_V4/Zm00001d034376_P003	Zm00001d034376_P003	Z.mays RefGen_V4	1.56e-70	36	417	+/+	seq.submitted 2021-10-26T21:58:54.283Z UTC	97	509	167	550	237.654	150	224	37	523	576
	phytozome-next.jgi.doe.gov/report/protein/Zmays_RefGen_V4/Zm00001d013105_P004	Zm00001d013105_P004	Z.mays RefGen_V4	3.91e-70	36	421	+/+	seq.submitted 2021-10-26T21:58:54.283Z UTC	97	509	171	559	236.884	151	225	40	523	585
	phytozome-next.jgi.doe.gov/report/protein/Zmays_RefGen_V4/Zm00001d013105_P001	Zm00001d013105_P001	Z.mays RefGen_V4	3.91e-70	36	421	+/+	seq.submitted 2021-10-26T21:58:54.283Z UTC	97	509	171	559	236.884	151	225	40	523	585
	phytozome-next.jgi.doe.gov/report/protein/Zmays_RefGen_V4/Zm00001d007912_P009	Zm00001d007912_P009	Z.mays RefGen_V4	7.44e-70	35	437	+/+	seq.submitted 2021-10-26T21:58:54.283Z UTC	97	509	169	573	236.498	151	227	56	523	598
	phytozome-next.jgi.doe.gov/report/protein/Zmays_RefGen_V4/Zm00001d013105_P003	Zm00001d013105_P003	Z.mays RefGen_V4	2.5e-69	36	417	+/+	seq.submitted 2021-10-26T21:58:54.283Z UTC	97	509	171	554	234.572	149	223	37	523	580
	phytozome-next.jgi.doe.gov/report/protein/Zmays_RefGen_V4/Zm00001d021623_P001	Zm00001d021623_P001	Z.mays RefGen_V4	6.75e-69	33	418	+/+	seq.submitted 2021-10-26T21:58:54.283Z UTC	97	508	133	521	232.261	140	229	35	523	532
	phytozome-next.jgi.doe.gov/report/protein/Zmays_RefGen_V4/Zm00001d021623_P004	Zm00001d021623_P004	Z.mays RefGen_V4	6.75e-69	33	418	+/+	seq.submitted 2021-10-26T21:58:54.283Z UTC	97	508	133	521	232.261	140	229	35	523	532
	phytozome-next.jgi.doe.gov/report/protein/Zmays_RefGen_V4/Zm00001d027480_P002	Zm00001d027480_P002	Z.mays RefGen_V4	9.08e-69	37	414	+/+	seq.submitted 2021-10-26T21:58:54.283Z UTC	97	508	129	516	232.261	152	218	28	523	545
	phytozome-next.jgi.doe.gov/report/protein/Zmays_RefGen_V4/Zm00001d006479_P005	Zm00001d006479_P005	Z.mays RefGen_V4	1.36e-68	33	418	+/+	seq.submitted 2021-10-26T21:58:54.283Z UTC	97	508	133	521	231.491	140	228	35	523	532
	phytozome-next.jgi.doe.gov/report/protein/Zmays_RefGen_V4/Zm00001d006479_P006	Zm00001d006479_P006	Z.mays RefGen_V4	1.36e-68	33	418	+/+	seq.submitted 2021-10-26T21:58:54.283Z UTC	97	508	133	521	231.491	140	228	35	523	532
	phytozome-next.jgi.doe.gov/report/protein/Zmays_RefGen_V4/Zm00001d006479_P002	Zm00001d006479_P002	Z.mays RefGen_V4	1.36e-68	33	418	+/+	seq.submitted 2021-10-26T21:58:54.283Z UTC	97	508	133	521	231.491	140	228	35	523	532
	phytozome-next.jgi.doe.gov/report/protein/Zmays_RefGen_V4/Zm00001d013030_P002	Zm00001d013030_P002	Z.mays RefGen_V4	3.27e-67	32	509	+/+	seq.submitted 2021-10-26T21:58:54.283Z UTC	6	508	55	499	228.024	162	249	70	523	535
	phytozome-next.jgi.doe.gov/report/protein/Zmays_RefGen_V4/Zm00001d013527_P002	Zm00001d013527_P002	Z.mays RefGen_V4	3.36e-66	32	510	+/+	seq.submitted 2021-10-26T21:58:54.283Z UTC	7	508	107	551	226.483	162	253	73	523	586
	phytozome-next.jgi.doe.gov/report/protein/Zmays_RefGen_V4/Zm00001d012457_P003	Zm00001d012457_P003	Z.mays RefGen_V4	1.74e-65	34	432	+/+	seq.submitted 2021-10-26T21:58:54.283Z UTC	81	508	101	501	223.402	145	227	35	523	537
	phytozome-next.jgi.doe.gov/report/protein/Zmays_RefGen_V4/Zm00001d038409_P011	Zm00001d038409_P011	Z.mays RefGen_V4	4.73e-65	33	438	+/+	seq.submitted 2021-10-26T21:58:54.283Z UTC	81	508	86	485	221.861	144	225	48	523	521
	phytozome-next.jgi.doe.gov/report/protein/Zmays_RefGen_V4/Zm00001d041165_P004	Zm00001d041165_P004	Z.mays RefGen_V4	6.32e-65	31	499	+/+	seq.submitted 2021-10-26T21:58:54.283Z UTC	12	508	77	513	222.631	155	250	64	523	566
	phytozome-next.jgi.doe.gov/report/protein/Zmays_RefGen_V4/Zm00001d041165_P002	Zm00001d041165_P002	Z.mays RefGen_V4	6.32e-65	31	499	+/+	seq.submitted 2021-10-26T21:58:54.283Z UTC	12	508	77	513	222.631	155	250	64	523	566
	phytozome-next.jgi.doe.gov/report/protein/Zmays_RefGen_V4/Zm00001d038409_P010	Zm00001d038409_P010	Z.mays RefGen_V4	8.18e-65	33	438	+/+	seq.submitted 2021-10-26T21:58:54.283Z UTC	81	508	106	505	221.476	144	225	48	523	541
	phytozome-next.jgi.doe.gov/report/protein/Zmays_RefGen_V4/Zm00001d010579_P002	Zm00001d010579_P002	Z.mays RefGen_V4	1.01e-64	33	438	+/+	seq.submitted 2021-10-26T21:58:54.283Z UTC	81	508	86	485	220.705	143	222	48	523	521
	phytozome-next.jgi.doe.gov/report/protein/Zmays_RefGen_V4/Zm00001d010579_P003	Zm00001d010579_P003	Z.mays RefGen_V4	1.02e-64	33	438	+/+	seq.submitted 2021-10-26T21:58:54.283Z UTC	81	508	107	506	221.476	143	222	48	523	542
	phytozome-next.jgi.doe.gov/report/protein/Zmays_RefGen_V4/Zm00001d010579_P001	Zm00001d010579_P001	Z.mays RefGen_V4	1.02e-64	33	438	+/+	seq.submitted 2021-10-26T21:58:54.283Z UTC	81	508	107	506	221.476	143	222	48	523	542
	phytozome-next.jgi.doe.gov/report/protein/Zmays_RefGen_V4/Zm00001d026018_P001	Zm00001d026018_P001	Z.mays RefGen_V4	1.21e-64	34	421	+/+	seq.submitted 2021-10-26T21:58:54.283Z UTC	97	509	143	531	221.476	145	220	40	523	557
	phytozome-next.jgi.doe.gov/report/protein/Zmays_RefGen_V4/Zm00001d024003_P001	Zm00001d024003_P001	Z.mays RefGen_V4	4.14e-64	30	501	+/+	seq.submitted 2021-10-26T21:58:54.283Z UTC	12	508	79	515	220.32	152	250	68	523	567
	phytozome-next.jgi.doe.gov/report/protein/Zmays_RefGen_V4/Zm00001d024003_P005	Zm00001d024003_P005	Z.mays RefGen_V4	4.14e-64	30	501	+/+	seq.submitted 2021-10-26T21:58:54.283Z UTC	12	508	79	515	220.32	152	250	68	523	567
	phytozome-next.jgi.doe.gov/report/protein/Zmays_RefGen_V4/Zm00001d006621_P006	Zm00001d006621_P006	Z.mays RefGen_V4	9.25e-64	31	508	+/+	seq.submitted 2021-10-26T21:58:54.283Z UTC	6	508	58	503	218.779	159	249	67	523	540
	phytozome-next.jgi.doe.gov/report/protein/Zmays_RefGen_V4/Zm00001d006621_P004	Zm00001d006621_P004	Z.mays RefGen_V4	9.25e-64	31	508	+/+	seq.submitted 2021-10-26T21:58:54.283Z UTC	6	508	58	503	218.779	159	249	67	523	540
	phytozome-next.jgi.doe.gov/report/protein/Zmays_RefGen_V4/Zm00001d051502_P007	Zm00001d051502_P007	Z.mays RefGen_V4	1.3e-63	34	421	+/+	seq.submitted 2021-10-26T21:58:54.283Z UTC	97	509	38	426	216.083	143	217	40	523	453
	phytozome-next.jgi.doe.gov/report/protein/Zmays_RefGen_V4/Zm00001d002540_P002	Zm00001d002540_P002	Z.mays RefGen_V4	2.11e-63	34	421	+/+	seq.submitted 2021-10-26T21:58:54.283Z UTC	97	509	134	522	218.009	144	218	40	523	548
	phytozome-next.jgi.doe.gov/report/protein/Zmays_RefGen_V4/Zm00001d021835_P007	Zm00001d021835_P007	Z.mays RefGen_V4	2.73e-63	33	415	+/+	seq.submitted 2021-10-26T21:58:54.283Z UTC	98	508	115	503	217.624	136	220	30	523	540
	phytozome-next.jgi.doe.gov/report/protein/Zmays_RefGen_V4/Zm00001d021835_P005	Zm00001d021835_P005	Z.mays RefGen_V4	2.73e-63	33	415	+/+	seq.submitted 2021-10-26T21:58:54.283Z UTC	98	508	115	503	217.624	136	220	30	523	540
	phytozome-next.jgi.doe.gov/report/protein/Zmays_RefGen_V4/Zm00001d021835_P001	Zm00001d021835_P001	Z.mays RefGen_V4	2.73e-63	33	415	+/+	seq.submitted 2021-10-26T21:58:54.283Z UTC	98	508	115	503	217.624	136	220	30	523	540
	phytozome-next.jgi.doe.gov/report/protein/Zmays_RefGen_V4/Zm00001d026139_P001	Zm00001d026139_P001	Z.mays RefGen_V4	3.2e-63	34	401	+/+	seq.submitted 2021-10-26T21:58:54.283Z UTC	69	465	117	498	218.779	135	206	23	523	594
	phytozome-next.jgi.doe.gov/report/protein/Zmays_RefGen_V4/Zm00001d051502_P001	Zm00001d051502_P001	Z.mays RefGen_V4	1.15e-62	34	421	+/+	seq.submitted 2021-10-26T21:58:54.283Z UTC	97	509	148	536	216.468	143	217	40	523	563
	phytozome-next.jgi.doe.gov/report/protein/Zmays_RefGen_V4/Zm00001d051502_P004	Zm00001d051502_P004	Z.mays RefGen_V4	1.15e-62	34	421	+/+	seq.submitted 2021-10-26T21:58:54.283Z UTC	97	509	148	536	216.468	143	217	40	523	563
	phytozome-next.jgi.doe.gov/report/protein/Zmays_RefGen_V4/Zm00001d038409_P001	Zm00001d038409_P001	Z.mays RefGen_V4	1.47e-61	33	428	+/+	seq.submitted 2021-10-26T21:58:54.283Z UTC	91	508	114	505	221.09	141	220	46	523	1216
	phytozome-next.jgi.doe.gov/report/protein/Zmays_RefGen_V4/Zm00001d038409_P001	Zm00001d038409_P001	Z.mays RefGen_V4	2.14e-07	25	253	+/+	seq.submitted 2021-10-26T21:58:54.283Z UTC	107	306	961	1202	55.8398	62	95	64	523	1216
	phytozome-next.jgi.doe.gov/report/protein/Zmays_RefGen_V4/Zm00001d004812_P005	Zm00001d004812_P005	Z.mays RefGen_V4	3.79e-60	44	243	+/+	seq.submitted 2021-10-26T21:58:54.283Z UTC	97	338	94	335	203.756	107	149	2	523	349
	phytozome-next.jgi.doe.gov/report/protein/Zmays_RefGen_V4/Zm00001d052713_P001	Zm00001d052713_P001	Z.mays RefGen_V4	6.3e-60	35	398	+/+	seq.submitted 2021-10-26T21:58:54.283Z UTC	116	508	21	387	205.297	138	205	36	523	416
	phytozome-next.jgi.doe.gov/report/protein/Zmays_RefGen_V4/Zm00001d005164_P001	Zm00001d005164_P001	Z.mays RefGen_V4	2.02e-58	31	423	+/+	seq.submitted 2021-10-26T21:58:54.283Z UTC	97	508	102	494	203.756	133	209	41	523	513
	phytozome-next.jgi.doe.gov/report/protein/Zmays_RefGen_V4/Zm00001d006117_P005	Zm00001d006117_P005	Z.mays RefGen_V4	4.32e-58	31	429	+/+	seq.submitted 2021-10-26T21:58:54.283Z UTC	91	516	116	517	203.756	131	222	30	523	539
	phytozome-next.jgi.doe.gov/report/protein/Zmays_RefGen_V4/Zm00001d006117_P003	Zm00001d006117_P003	Z.mays RefGen_V4	4.32e-58	31	429	+/+	seq.submitted 2021-10-26T21:58:54.283Z UTC	91	516	116	517	203.756	131	222	30	523	539
	phytozome-next.jgi.doe.gov/report/protein/Zmays_RefGen_V4/Zm00001d006117_P002	Zm00001d006117_P002	Z.mays RefGen_V4	4.32e-58	31	429	+/+	seq.submitted 2021-10-26T21:58:54.283Z UTC	91	516	116	517	203.756	131	222	30	523	539
	phytozome-next.jgi.doe.gov/report/protein/Zmays_RefGen_V4/Zm00001d015100_P002	Zm00001d015100_P002	Z.mays RefGen_V4	1.99e-57	31	431	+/+	seq.submitted 2021-10-26T21:58:54.283Z UTC	97	516	109	510	201.445	135	218	40	523	523
	phytozome-next.jgi.doe.gov/report/protein/Zmays_RefGen_V4/Zm00001d029758_P004	Zm00001d029758_P004	Z.mays RefGen_V4	5.13e-57	34	432	+/+	seq.submitted 2021-10-26T21:58:54.283Z UTC	91	512	126	518	200.675	147	211	49	523	541
	phytozome-next.jgi.doe.gov/report/protein/Zmays_RefGen_V4/Zm00001d006621_P005	Zm00001d006621_P005	Z.mays RefGen_V4	6.31e-57	36	338	+/+	seq.submitted 2021-10-26T21:58:54.283Z UTC	6	338	58	355	195.667	122	180	45	523	363
	phytozome-next.jgi.doe.gov/report/protein/Zmays_RefGen_V4/Zm00001d021835_P006	Zm00001d021835_P006	Z.mays RefGen_V4	1.23e-56	41	246	+/+	seq.submitted 2021-10-26T21:58:54.283Z UTC	98	338	115	355	194.897	101	148	10	523	363
	phytozome-next.jgi.doe.gov/report/protein/Zmays_RefGen_V4/Zm00001d052713_P004	Zm00001d052713_P004	Z.mays RefGen_V4	1.7e-56	34	386	+/+	seq.submitted 2021-10-26T21:58:54.283Z UTC	125	508	1	357	195.282	131	193	31	523	386
	phytozome-next.jgi.doe.gov/report/protein/Zmays_RefGen_V4/Zm00001d015100_P001	Zm00001d015100_P001	Z.mays RefGen_V4	2.23e-56	31	431	+/+	seq.submitted 2021-10-26T21:58:54.283Z UTC	97	516	109	508	198.749	134	216	42	523	521
	phytozome-next.jgi.doe.gov/report/protein/Zmays_RefGen_V4/Zm00001d021139_P006	Zm00001d021139_P006	Z.mays RefGen_V4	2.28e-56	30	433	+/+	seq.submitted 2021-10-26T21:58:54.283Z UTC	86	516	115	521	199.134	132	221	28	523	543
	phytozome-next.jgi.doe.gov/report/protein/Zmays_RefGen_V4/Zm00001d021139_P005	Zm00001d021139_P005	Z.mays RefGen_V4	2.28e-56	30	433	+/+	seq.submitted 2021-10-26T21:58:54.283Z UTC	86	516	115	521	199.134	132	221	28	523	543
	phytozome-next.jgi.doe.gov/report/protein/Zmays_RefGen_V4/Zm00001d021139_P001	Zm00001d021139_P001	Z.mays RefGen_V4	3.69e-56	29	511	+/+	seq.submitted 2021-10-26T21:58:54.283Z UTC	8	516	73	529	198.749	149	245	56	523	551
	phytozome-next.jgi.doe.gov/report/protein/Zmays_RefGen_V4/Zm00001d021139_P003	Zm00001d021139_P003	Z.mays RefGen_V4	3.69e-56	29	511	+/+	seq.submitted 2021-10-26T21:58:54.283Z UTC	8	516	73	529	198.749	149	245	56	523	551
	phytozome-next.jgi.doe.gov/report/protein/Zmays_RefGen_V4/Zm00001d027480_P003	Zm00001d027480_P003	Z.mays RefGen_V4	9.51e-56	42	243	+/+	seq.submitted 2021-10-26T21:58:54.283Z UTC	97	338	129	370	192.971	102	147	2	523	376
	phytozome-next.jgi.doe.gov/report/protein/Zmays_RefGen_V4/Zm00001d006117_P007	Zm00001d006117_P007	Z.mays RefGen_V4	1.37e-55	32	380	+/+	seq.submitted 2021-10-26T21:58:54.283Z UTC	91	468	116	472	196.052	121	198	25	523	500
	phytozome-next.jgi.doe.gov/report/protein/Zmays_RefGen_V4/Zm00001d012457_P002	Zm00001d012457_P002	Z.mays RefGen_V4	1.39e-55	36	303	+/+	seq.submitted 2021-10-26T21:58:54.283Z UTC	91	392	109	387	194.126	110	172	25	523	431
	phytozome-next.jgi.doe.gov/report/protein/Zmays_RefGen_V4/Zm00001d041165_P001	Zm00001d041165_P001	Z.mays RefGen_V4	3.49e-55	31	386	+/+	seq.submitted 2021-10-26T21:58:54.283Z UTC	125	508	1	359	192.586	121	198	29	523	412
	phytozome-next.jgi.doe.gov/report/protein/Zmays_RefGen_V4/Zm00001d021139_P009	Zm00001d021139_P009	Z.mays RefGen_V4	2.26e-54	32	388	+/+	seq.submitted 2021-10-26T21:58:54.283Z UTC	86	452	123	507	192.971	124	196	24	523	512
	phytozome-next.jgi.doe.gov/report/protein/Zmays_RefGen_V4/Zm00001d029264_P024	Zm00001d029264_P024	Z.mays RefGen_V4	4.28e-54	40	243	+/+	seq.submitted 2021-10-26T21:58:54.283Z UTC	97	338	15	256	185.267	96	146	2	523	267
	phytozome-next.jgi.doe.gov/report/protein/Zmays_RefGen_V4/Zm00001d011392_P004	Zm00001d011392_P004	Z.mays RefGen_V4	6.81e-54	45	206	+/+	seq.submitted 2021-10-26T21:58:54.283Z UTC	97	302	128	332	187.963	92	133	1	523	374
	phytozome-next.jgi.doe.gov/report/protein/Zmays_RefGen_V4/Zm00001d029264_P017	Zm00001d029264_P017	Z.mays RefGen_V4	1.54e-53	32	384	+/+	seq.submitted 2021-10-26T21:58:54.283Z UTC	97	469	33	394	188.734	124	200	33	523	434
	phytozome-next.jgi.doe.gov/report/protein/Zmays_RefGen_V4/Zm00001d038409_P002	Zm00001d038409_P002	Z.mays RefGen_V4	1.82e-53	31	427	+/+	seq.submitted 2021-10-26T21:58:54.283Z UTC	91	508	114	478	197.208	133	207	71	523	1189
	phytozome-next.jgi.doe.gov/report/protein/Zmays_RefGen_V4/Zm00001d038409_P002	Zm00001d038409_P002	Z.mays RefGen_V4	2.29e-07	25	253	+/+	seq.submitted 2021-10-26T21:58:54.283Z UTC	107	306	934	1175	55.8398	62	95	64	523	1189
	phytozome-next.jgi.doe.gov/report/protein/Zmays_RefGen_V4/Zm00001d024003_P003	Zm00001d024003_P003	Z.mays RefGen_V4	2.07e-53	31	388	+/+	seq.submitted 2021-10-26T21:58:54.283Z UTC	125	508	1	359	187.963	120	199	33	523	411
	phytozome-next.jgi.doe.gov/report/protein/Zmays_RefGen_V4/Zm00001d021139_P008	Zm00001d021139_P008	Z.mays RefGen_V4	2.3e-52	28	535	+/+	seq.submitted 2021-10-26T21:58:54.283Z UTC	8	516	73	553	188.734	151	245	80	523	575
	phytozome-next.jgi.doe.gov/report/protein/Zmays_RefGen_V4/Zm00001d040996_P002	Zm00001d040996_P002	Z.mays RefGen_V4	4.09e-52	34	366	+/+	seq.submitted 2021-10-26T21:58:54.283Z UTC	155	512	207	540	187.963	126	194	40	523	564
	phytozome-next.jgi.doe.gov/report/protein/Zmays_RefGen_V4/Zm00001d029264_P016	Zm00001d029264_P016	Z.mays RefGen_V4	6.44e-52	32	384	+/+	seq.submitted 2021-10-26T21:58:54.283Z UTC	97	469	186	547	187.963	124	200	33	523	587
	Paralogs	Protein/Splice variants	Species	E-value	% identity	Align len	Strands	Query ID	Query from	Query to	Target from	Target to	Bitscore
	1	Zm00001d052944_P001	Z.mays RefGen_V4	0	69	521	+/+	seq.submitted 2021-10-26T21:58:54.283Z UTC	5	522	6	523	726.857
	2	Zm00001d019620_P001	Z.mays RefGen_V4	2.6e-125	68	268	+/+	seq.submitted 2021-10-26T21:58:54.283Z UTC	255	522	103	370	372.859

## Sheet: Oryza
	Views	Protein	Species	E-value	% identity	Align len	Strands	Query ID	Query from	Query to	Target from	Target to	Bitscore	# identical	Positives	Gaps	Query len	Target len
	phytozome-next.jgi.doe.gov/report/protein/Osativa_v7_0/LOC_Os05g41090.1	LOC_Os05g41090.1	O.sativa v7.0	0	70	519	+/+	seq.submitted 2021-10-26T22:00:42.126Z UTC	5	523	6	515	744.577	363	433	9	523	517
	phytozome-next.jgi.doe.gov/report/protein/Osativa_v7_0/LOC_Os01g59360.1	LOC_Os01g59360.1	O.sativa v7.0	3.39e-78	36	422	+/+	seq.submitted 2021-10-26T22:00:42.126Z UTC	97	509	111	500	254.988	152	226	41	523	516
	phytozome-next.jgi.doe.gov/report/protein/Osativa_v7_0/LOC_Os05g50810.1	LOC_Os05g50810.1	O.sativa v7.0	4.14e-76	35	423	+/+	seq.submitted 2021-10-26T22:00:42.126Z UTC	97	511	163	554	250.751	150	231	39	523	566
	phytozome-next.jgi.doe.gov/report/protein/Osativa_v7_0/LOC_Os03g57450.1	LOC_Os03g57450.1	O.sativa v7.0	1.43e-75	37	421	+/+	seq.submitted 2021-10-26T22:00:42.126Z UTC	97	509	183	571	250.366	156	232	40	523	600
	phytozome-next.jgi.doe.gov/report/protein/Osativa_v7_0/LOC_Os11g07040.1	LOC_Os11g07040.1	O.sativa v7.0	2.74e-75	36	418	+/+	seq.submitted 2021-10-26T22:00:42.126Z UTC	97	512	97	488	247.284	150	222	28	523	514
	phytozome-next.jgi.doe.gov/report/protein/Osativa_v7_0/LOC_Os12g30150.1	LOC_Os12g30150.1	O.sativa v7.0	3.04e-75	36	438	+/+	seq.submitted 2021-10-26T22:00:42.126Z UTC	87	512	186	591	249.595	159	240	44	523	613
	phytozome-next.jgi.doe.gov/report/protein/Osativa_v7_0/LOC_Os01g43410.1	LOC_Os01g43410.1	O.sativa v7.0	2.11e-73	34	423	+/+	seq.submitted 2021-10-26T22:00:42.126Z UTC	97	511	116	507	242.276	144	229	39	523	519
	phytozome-next.jgi.doe.gov/report/protein/Osativa_v7_0/LOC_Os12g07230.1	LOC_Os12g07230.1	O.sativa v7.0	2.38e-73	35	450	+/+	seq.submitted 2021-10-26T22:00:42.126Z UTC	64	509	69	487	242.662	156	232	35	523	527
	phytozome-next.jgi.doe.gov/report/protein/Osativa_v7_0/LOC_Os11g04170.1	LOC_Os11g04170.1	O.sativa v7.0	5.99e-73	33	425	+/+	seq.submitted 2021-10-26T22:00:42.126Z UTC	97	517	133	530	241.891	142	228	31	523	542
	phytozome-next.jgi.doe.gov/report/protein/Osativa_v7_0/LOC_Os12g03970.1	LOC_Os12g03970.1	O.sativa v7.0	7.01e-73	33	425	+/+	seq.submitted 2021-10-26T22:00:42.126Z UTC	97	517	133	530	241.506	142	228	31	523	542
	phytozome-next.jgi.doe.gov/report/protein/Osativa_v7_0/LOC_Os05g41270.1	LOC_Os05g41270.1	O.sativa v7.0	9.05e-72	33	417	+/+	seq.submitted 2021-10-26T22:00:42.126Z UTC	97	509	118	507	238.039	139	224	31	523	523
	phytozome-next.jgi.doe.gov/report/protein/Osativa_v7_0/LOC_Os03g57510.1	LOC_Os03g57510.1	O.sativa v7.0	2.11e-71	36	435	+/+	seq.submitted 2021-10-26T22:00:42.126Z UTC	87	509	149	551	238.81	157	231	44	523	577
	phytozome-next.jgi.doe.gov/report/protein/Osativa_v7_0/LOC_Os07g33110.3	LOC_Os07g33110.3	O.sativa v7.0	5.38e-71	33	421	+/+	seq.submitted 2021-10-26T22:00:42.126Z UTC	97	514	135	527	236.498	139	228	31	523	534
	phytozome-next.jgi.doe.gov/report/protein/Osativa_v7_0/LOC_Os07g33110.4	LOC_Os07g33110.4	O.sativa v7.0	5.38e-71	33	421	+/+	seq.submitted 2021-10-26T22:00:42.126Z UTC	97	514	135	527	236.498	139	228	31	523	534
	phytozome-next.jgi.doe.gov/report/protein/Osativa_v7_0/LOC_Os07g33110.2	LOC_Os07g33110.2	O.sativa v7.0	5.38e-71	33	421	+/+	seq.submitted 2021-10-26T22:00:42.126Z UTC	97	514	135	527	236.498	139	228	31	523	534
	phytozome-next.jgi.doe.gov/report/protein/Osativa_v7_0/LOC_Os07g33110.1	LOC_Os07g33110.1	O.sativa v7.0	5.38e-71	33	421	+/+	seq.submitted 2021-10-26T22:00:42.126Z UTC	97	514	135	527	236.498	139	228	31	523	534
	phytozome-next.jgi.doe.gov/report/protein/Osativa_v7_0/LOC_Os07g06740.1	LOC_Os07g06740.1	O.sativa v7.0	6.29e-71	35	417	+/+	seq.submitted 2021-10-26T22:00:42.126Z UTC	97	509	156	544	237.269	148	223	32	523	569
	phytozome-next.jgi.doe.gov/report/protein/Osativa_v7_0/LOC_Os07g06740.2	LOC_Os07g06740.2	O.sativa v7.0	6.29e-71	35	417	+/+	seq.submitted 2021-10-26T22:00:42.126Z UTC	97	509	156	544	237.269	148	223	32	523	569
	phytozome-next.jgi.doe.gov/report/protein/Osativa_v7_0/LOC_Os05g50810.2	LOC_Os05g50810.2	O.sativa v7.0	2.08e-70	37	377	+/+	seq.submitted 2021-10-26T22:00:42.126Z UTC	97	465	163	515	234.958	139	209	32	523	539
	phytozome-next.jgi.doe.gov/report/protein/Osativa_v7_0/LOC_Os04g47300.1	LOC_Os04g47300.1	O.sativa v7.0	4.36e-69	34	414	+/+	seq.submitted 2021-10-26T22:00:42.126Z UTC	98	509	142	529	231.491	139	212	28	523	534
	phytozome-next.jgi.doe.gov/report/protein/Osativa_v7_0/LOC_Os03g03660.4	LOC_Os03g03660.4	O.sativa v7.0	3.06e-67	37	414	+/+	seq.submitted 2021-10-26T22:00:42.126Z UTC	97	508	129	516	226.868	153	216	28	523	543
	phytozome-next.jgi.doe.gov/report/protein/Osativa_v7_0/LOC_Os03g03660.3	LOC_Os03g03660.3	O.sativa v7.0	3.06e-67	37	414	+/+	seq.submitted 2021-10-26T22:00:42.126Z UTC	97	508	129	516	226.868	153	216	28	523	543
	phytozome-next.jgi.doe.gov/report/protein/Osativa_v7_0/LOC_Os03g03660.2	LOC_Os03g03660.2	O.sativa v7.0	3.06e-67	37	414	+/+	seq.submitted 2021-10-26T22:00:42.126Z UTC	97	508	129	516	226.868	153	216	28	523	543
	phytozome-next.jgi.doe.gov/report/protein/Osativa_v7_0/LOC_Os03g03660.1	LOC_Os03g03660.1	O.sativa v7.0	6.62e-67	37	414	+/+	seq.submitted 2021-10-26T22:00:42.126Z UTC	97	508	129	516	226.483	153	216	28	523	565
	phytozome-next.jgi.doe.gov/report/protein/Osativa_v7_0/LOC_Os04g49510.1	LOC_Os04g49510.1	O.sativa v7.0	1.25e-66	35	419	+/+	seq.submitted 2021-10-26T22:00:42.126Z UTC	97	509	138	526	225.328	146	218	36	523	552
	phytozome-next.jgi.doe.gov/report/protein/Osativa_v7_0/LOC_Os09g33910.1	LOC_Os09g33910.1	O.sativa v7.0	3.73e-66	34	422	+/+	seq.submitted 2021-10-26T22:00:42.126Z UTC	91	507	154	547	224.557	142	226	33	523	578
	phytozome-next.jgi.doe.gov/report/protein/Osativa_v7_0/LOC_Os01g61590.1	LOC_Os01g61590.1	O.sativa v7.0	1.36e-65	33	432	+/+	seq.submitted 2021-10-26T22:00:42.126Z UTC	81	508	117	516	222.631	144	224	36	523	552
	phytozome-next.jgi.doe.gov/report/protein/Osativa_v7_0/LOC_Os02g46090.1	LOC_Os02g46090.1	O.sativa v7.0	4.56e-65	34	421	+/+	seq.submitted 2021-10-26T22:00:42.126Z UTC	97	509	142	530	221.09	145	218	40	523	550
	phytozome-next.jgi.doe.gov/report/protein/Osativa_v7_0/LOC_Os07g38120.1	LOC_Os07g38120.1	O.sativa v7.0	9.25e-65	33	419	+/+	seq.submitted 2021-10-26T22:00:42.126Z UTC	98	508	126	514	220.32	140	222	38	523	551
	phytozome-next.jgi.doe.gov/report/protein/Osativa_v7_0/LOC_Os05g39090.1	LOC_Os05g39090.1	O.sativa v7.0	1.71e-64	33	432	+/+	seq.submitted 2021-10-26T22:00:42.126Z UTC	81	508	113	512	219.55	144	222	36	523	548
	phytozome-next.jgi.doe.gov/report/protein/Osativa_v7_0/LOC_Os03g59390.1	LOC_Os03g59390.1	O.sativa v7.0	6.24e-64	32	417	+/+	seq.submitted 2021-10-26T22:00:42.126Z UTC	98	508	115	503	218.009	132	216	34	523	539
	phytozome-next.jgi.doe.gov/report/protein/Osativa_v7_0/LOC_Os02g58520.1	LOC_Os02g58520.1	O.sativa v7.0	3.59e-63	33	417	+/+	seq.submitted 2021-10-26T22:00:42.126Z UTC	97	511	124	514	216.083	139	217	28	523	546
	phytozome-next.jgi.doe.gov/report/protein/Osativa_v7_0/LOC_Os10g39420.1	LOC_Os10g39420.1	O.sativa v7.0	4.28e-62	33	418	+/+	seq.submitted 2021-10-26T22:00:42.126Z UTC	97	511	123	511	213.001	139	215	32	523	535
	phytozome-next.jgi.doe.gov/report/protein/Osativa_v7_0/LOC_Os12g12860.1	LOC_Os12g12860.1	O.sativa v7.0	8.71e-62	30	500	+/+	seq.submitted 2021-10-26T22:00:42.126Z UTC	12	507	84	519	212.616	149	247	68	523	564
	phytozome-next.jgi.doe.gov/report/protein/Osativa_v7_0/LOC_Os03g48270.1	LOC_Os03g48270.1	O.sativa v7.0	4.46e-61	31	508	+/+	seq.submitted 2021-10-26T22:00:42.126Z UTC	7	508	96	540	211.075	155	250	69	523	575
	phytozome-next.jgi.doe.gov/report/protein/Osativa_v7_0/LOC_Os02g03410.1	LOC_Os02g03410.1	O.sativa v7.0	9.85e-59	31	445	+/+	seq.submitted 2021-10-26T22:00:42.126Z UTC	78	511	96	506	203.756	138	224	45	523	523
	phytozome-next.jgi.doe.gov/report/protein/Osativa_v7_0/LOC_Os08g42750.1	LOC_Os08g42750.1	O.sativa v7.0	2.12e-58	30	510	+/+	seq.submitted 2021-10-26T22:00:42.126Z UTC	7	508	72	534	203.756	152	241	55	523	566
	phytozome-next.jgi.doe.gov/report/protein/Osativa_v7_0/LOC_Os02g03410.2	LOC_Os02g03410.2	O.sativa v7.0	7.79e-58	31	445	+/+	seq.submitted 2021-10-26T22:00:42.126Z UTC	78	511	96	504	201.06	137	222	47	523	521
	phytozome-next.jgi.doe.gov/report/protein/Osativa_v7_0/LOC_Os07g22710.1	LOC_Os07g22710.1	O.sativa v7.0	6.41e-57	31	423	+/+	seq.submitted 2021-10-26T22:00:42.126Z UTC	97	508	102	494	198.364	133	208	41	523	513
	phytozome-next.jgi.doe.gov/report/protein/Osativa_v7_0/LOC_Os04g49510.2	LOC_Os04g49510.2	O.sativa v7.0	1.07e-56	39	304	+/+	seq.submitted 2021-10-26T22:00:42.126Z UTC	97	394	138	419	196.052	118	170	28	523	439
	phytozome-next.jgi.doe.gov/report/protein/Osativa_v7_0/LOC_Os07g33110.5	LOC_Os07g33110.5	O.sativa v7.0	1.3e-56	40	242	+/+	seq.submitted 2021-10-26T22:00:42.126Z UTC	97	338	135	375	194.126	97	147	1	523	385
	phytozome-next.jgi.doe.gov/report/protein/Osativa_v7_0/LOC_Os07g22710.2	LOC_Os07g22710.2	O.sativa v7.0	7.79e-50	36	303	+/+	seq.submitted 2021-10-26T22:00:42.126Z UTC	97	396	102	384	177.178	108	163	23	523	425
	phytozome-next.jgi.doe.gov/report/protein/Osativa_v7_0/LOC_Os06g03682.1	LOC_Os06g03682.1	O.sativa v7.0	1.69e-48	42	217	+/+	seq.submitted 2021-10-26T22:00:42.126Z UTC	91	307	85	296	175.637	92	128	5	523	507
	phytozome-next.jgi.doe.gov/report/protein/Osativa_v7_0/LOC_Os07g44710.1	LOC_Os07g44710.1	O.sativa v7.0	1.98e-48	31	373	+/+	seq.submitted 2021-10-26T22:00:42.126Z UTC	97	465	194	551	177.178	115	191	19	523	595
	phytozome-next.jgi.doe.gov/report/protein/Osativa_v7_0/LOC_Os07g42770.1	LOC_Os07g42770.1	O.sativa v7.0	3.27e-48	36	283	+/+	seq.submitted 2021-10-26T22:00:42.126Z UTC	97	372	52	330	173.711	101	164	11	523	454
	phytozome-next.jgi.doe.gov/report/protein/Osativa_v7_0/LOC_Os03g25070.1	LOC_Os03g25070.1	O.sativa v7.0	1.01e-47	41	229	+/+	seq.submitted 2021-10-26T22:00:42.126Z UTC	97	324	200	426	175.252	94	139	3	523	601
	phytozome-next.jgi.doe.gov/report/protein/Osativa_v7_0/LOC_Os10g36710.1	LOC_Os10g36710.1	O.sativa v7.0	5.97e-46	32	375	+/+	seq.submitted 2021-10-26T22:00:42.126Z UTC	97	462	231	585	170.629	119	202	29	523	633
	phytozome-next.jgi.doe.gov/report/protein/Osativa_v7_0/LOC_Os06g50030.1	LOC_Os06g50030.1	O.sativa v7.0	1.92e-44	31	379	+/+	seq.submitted 2021-10-26T22:00:42.126Z UTC	97	469	225	584	166.392	116	192	25	523	624
	phytozome-next.jgi.doe.gov/report/protein/Osativa_v7_0/LOC_Os02g56310.1	LOC_Os02g56310.1	O.sativa v7.0	6.12e-42	39	203	+/+	seq.submitted 2021-10-26T22:00:42.126Z UTC	106	306	82	279	152.14	79	121	7	523	290
	phytozome-next.jgi.doe.gov/report/protein/Osativa_v7_0/LOC_Os09g29170.1	LOC_Os09g29170.1	O.sativa v7.0	1.32e-39	38	209	+/+	seq.submitted 2021-10-26T22:00:42.126Z UTC	98	306	150	354	149.828	80	120	4	523	454
	phytozome-next.jgi.doe.gov/report/protein/Osativa_v7_0/LOC_Os09g29170.2	LOC_Os09g29170.2	O.sativa v7.0	1.32e-39	38	209	+/+	seq.submitted 2021-10-26T22:00:42.126Z UTC	98	306	150	354	149.828	80	120	4	523	454
	phytozome-next.jgi.doe.gov/report/protein/Osativa_v7_0/LOC_Os09g29170.3	LOC_Os09g29170.3	O.sativa v7.0	2.96e-37	38	205	+/+	seq.submitted 2021-10-26T22:00:42.126Z UTC	98	302	150	350	141.739	77	117	4	523	373
	phytozome-next.jgi.doe.gov/report/protein/Osativa_v7_0/LOC_Os07g22710.3	LOC_Os07g22710.3	O.sativa v7.0	3.9e-37	29	355	+/+	seq.submitted 2021-10-26T22:00:42.126Z UTC	163	508	9	333	140.969	104	164	39	523	352
	phytozome-next.jgi.doe.gov/report/protein/Osativa_v7_0/LOC_Os04g49510.3	LOC_Os04g49510.3	O.sativa v7.0	2.46e-36	47	158	+/+	seq.submitted 2021-10-26T22:00:42.126Z UTC	97	250	138	290	137.117	75	100	9	523	294
	phytozome-next.jgi.doe.gov/report/protein/Osativa_v7_0/LOC_Os11g03970.2	LOC_Os11g03970.2	O.sativa v7.0	6.72e-35	37	240	+/+	seq.submitted 2021-10-26T22:00:42.126Z UTC	83	307	39	269	136.732	88	130	24	523	455
	phytozome-next.jgi.doe.gov/report/protein/Osativa_v7_0/LOC_Os11g03970.1	LOC_Os11g03970.1	O.sativa v7.0	6.72e-35	37	240	+/+	seq.submitted 2021-10-26T22:00:42.126Z UTC	83	307	39	269	136.732	88	130	24	523	455
	phytozome-next.jgi.doe.gov/report/protein/Osativa_v7_0/LOC_Os12g03810.2	LOC_Os12g03810.2	O.sativa v7.0	7.09e-35	37	240	+/+	seq.submitted 2021-10-26T22:00:42.126Z UTC	83	307	39	269	136.346	88	130	24	523	439
	phytozome-next.jgi.doe.gov/report/protein/Osativa_v7_0/LOC_Os12g03810.1	LOC_Os12g03810.1	O.sativa v7.0	7.3e-35	38	232	+/+	seq.submitted 2021-10-26T22:00:42.126Z UTC	82	307	4	221	135.576	89	126	20	523	391
	phytozome-next.jgi.doe.gov/report/protein/Osativa_v7_0/LOC_Os03g16130.1	LOC_Os03g16130.1	O.sativa v7.0	1.08e-33	35	219	+/+	seq.submitted 2021-10-26T22:00:42.126Z UTC	88	306	68	280	135.961	77	122	6	523	715
	phytozome-next.jgi.doe.gov/report/protein/Osativa_v7_0/LOC_Os03g03510.1	LOC_Os03g03510.1	O.sativa v7.0	1.21e-33	33	278	+/+	seq.submitted 2021-10-26T22:00:42.126Z UTC	65	317	31	300	133.265	93	136	33	523	457
	phytozome-next.jgi.doe.gov/report/protein/Osativa_v7_0/LOC_Os08g34240.1	LOC_Os08g34240.1	O.sativa v7.0	1.5e-33	37	224	+/+	seq.submitted 2021-10-26T22:00:42.126Z UTC	88	307	68	279	132.88	82	121	16	523	452
	phytozome-next.jgi.doe.gov/report/protein/Osativa_v7_0/LOC_Os07g05620.1	LOC_Os07g05620.1	O.sativa v7.0	2.34e-33	37	208	+/+	seq.submitted 2021-10-26T22:00:42.126Z UTC	105	307	70	269	132.494	77	120	13	523	451
	phytozome-next.jgi.doe.gov/report/protein/Osativa_v7_0/LOC_Os04g58990.1	LOC_Os04g58990.1	O.sativa v7.0	2.36e-33	37	207	+/+	seq.submitted 2021-10-26T22:00:42.126Z UTC	105	307	71	274	128.257	77	114	7	523	276
	phytozome-next.jgi.doe.gov/report/protein/Osativa_v7_0/LOC_Os07g05620.2	LOC_Os07g05620.2	O.sativa v7.0	2.37e-33	37	208	+/+	seq.submitted 2021-10-26T22:00:42.126Z UTC	105	307	70	269	132.494	77	120	13	523	450
	phytozome-next.jgi.doe.gov/report/protein/Osativa_v7_0/LOC_Os06g40370.1	LOC_Os06g40370.1	O.sativa v7.0	3.05e-33	37	231	+/+	seq.submitted 2021-10-26T22:00:42.126Z UTC	85	307	52	272	132.109	86	125	18	523	454
	phytozome-next.jgi.doe.gov/report/protein/Osativa_v7_0/LOC_Os09g25100.1	LOC_Os09g25100.1	O.sativa v7.0	4.67e-33	38	225	+/+	seq.submitted 2021-10-26T22:00:42.126Z UTC	88	307	56	267	130.568	85	119	18	523	405
	phytozome-next.jgi.doe.gov/report/protein/Osativa_v7_0/LOC_Os03g17980.2	LOC_Os03g17980.2	O.sativa v7.0	6.93e-33	38	219	+/+	seq.submitted 2021-10-26T22:00:42.126Z UTC	91	307	65	270	132.109	84	122	15	523	509
	phytozome-next.jgi.doe.gov/report/protein/Osativa_v7_0/LOC_Os08g37800.1	LOC_Os08g37800.1	O.sativa v7.0	8.17e-33	38	219	+/+	seq.submitted 2021-10-26T22:00:42.126Z UTC	91	307	65	270	131.724	84	122	15	523	510
	phytozome-next.jgi.doe.gov/report/protein/Osativa_v7_0/LOC_Os03g17980.1	LOC_Os03g17980.1	O.sativa v7.0	1.01e-32	38	219	+/+	seq.submitted 2021-10-26T22:00:42.126Z UTC	91	307	108	313	132.109	84	122	15	523	549
	phytozome-next.jgi.doe.gov/report/protein/Osativa_v7_0/LOC_Os01g65230.1	LOC_Os01g65230.1	O.sativa v7.0	1.07e-32	37	238	+/+	seq.submitted 2021-10-26T22:00:42.126Z UTC	95	315	98	326	131.339	87	123	26	523	499
	phytozome-next.jgi.doe.gov/report/protein/Osativa_v7_0/LOC_Os09g25090.1	LOC_Os09g25090.1	O.sativa v7.0	1.34e-32	37	225	+/+	seq.submitted 2021-10-26T22:00:42.126Z UTC	88	307	68	278	130.183	83	121	19	523	457
	phytozome-next.jgi.doe.gov/report/protein/Osativa_v7_0/LOC_Os02g06570.1	LOC_Os02g06570.1	O.sativa v7.0	1.6e-32	37	232	+/+	seq.submitted 2021-10-26T22:00:42.126Z UTC	88	314	57	272	130.568	86	129	21	523	494
	phytozome-next.jgi.doe.gov/report/protein/Osativa_v7_0/LOC_Os02g06570.2	LOC_Os02g06570.2	O.sativa v7.0	1.6e-32	37	232	+/+	seq.submitted 2021-10-26T22:00:42.126Z UTC	88	314	57	272	130.568	86	129	21	523	494
	phytozome-next.jgi.doe.gov/report/protein/Osativa_v7_0/LOC_Os03g55620.2	LOC_Os03g55620.2	O.sativa v7.0	2.14e-32	37	205	+/+	seq.submitted 2021-10-26T22:00:42.126Z UTC	105	306	68	262	125.946	75	111	13	523	280
	phytozome-next.jgi.doe.gov/report/protein/Osativa_v7_0/LOC_Os03g55620.3	LOC_Os03g55620.3	O.sativa v7.0	2.14e-32	37	205	+/+	seq.submitted 2021-10-26T22:00:42.126Z UTC	105	306	68	262	125.946	75	111	13	523	280
	phytozome-next.jgi.doe.gov/report/protein/Osativa_v7_0/LOC_Os05g45420.1	LOC_Os05g45420.1	O.sativa v7.0	6.21e-32	35	274	+/+	seq.submitted 2021-10-26T22:00:42.126Z UTC	53	305	5	265	129.028	97	142	34	523	506
	phytozome-next.jgi.doe.gov/report/protein/Osativa_v7_0/LOC_Os05g45420.2	LOC_Os05g45420.2	O.sativa v7.0	6.21e-32	35	274	+/+	seq.submitted 2021-10-26T22:00:42.126Z UTC	53	305	5	265	129.028	97	142	34	523	506
	phytozome-next.jgi.doe.gov/report/protein/Osativa_v7_0/LOC_Os05g45420.3	LOC_Os05g45420.3	O.sativa v7.0	6.21e-32	35	274	+/+	seq.submitted 2021-10-26T22:00:42.126Z UTC	53	305	5	265	129.028	97	142	34	523	506
	phytozome-next.jgi.doe.gov/report/protein/Osativa_v7_0/LOC_Os01g09580.2	LOC_Os01g09580.2	O.sativa v7.0	1.51e-31	35	214	+/+	seq.submitted 2021-10-26T22:00:42.126Z UTC	95	306	74	280	124.02	74	116	9	523	293
	phytozome-next.jgi.doe.gov/report/protein/Osativa_v7_0/LOC_Os01g60910.1	LOC_Os01g60910.1	O.sativa v7.0	1.72e-31	36	225	+/+	seq.submitted 2021-10-26T22:00:42.126Z UTC	88	307	57	268	127.872	82	123	18	523	503
	phytozome-next.jgi.doe.gov/report/protein/Osativa_v7_0/LOC_Os01g60910.2	LOC_Os01g60910.2	O.sativa v7.0	1.96e-31	36	225	+/+	seq.submitted 2021-10-26T22:00:42.126Z UTC	88	307	16	227	127.102	82	123	18	523	462
	phytozome-next.jgi.doe.gov/report/protein/Osativa_v7_0/LOC_Os01g09580.1	LOC_Os01g09580.1	O.sativa v7.0	2.63e-31	35	214	+/+	seq.submitted 2021-10-26T22:00:42.126Z UTC	95	306	77	283	123.25	74	116	9	523	296
	phytozome-next.jgi.doe.gov/report/protein/Osativa_v7_0/LOC_Os05g04550.1	LOC_Os05g04550.1	O.sativa v7.0	3.11e-31	37	207	+/+	seq.submitted 2021-10-26T22:00:42.126Z UTC	105	307	70	269	126.331	76	116	11	523	455
	phytozome-next.jgi.doe.gov/report/protein/Osativa_v7_0/LOC_Os05g11790.1	LOC_Os05g11790.1	O.sativa v7.0	3.43e-31	36	233	+/+	seq.submitted 2021-10-26T22:00:42.126Z UTC	88	312	59	282	126.331	84	123	17	523	467
	phytozome-next.jgi.doe.gov/report/protein/Osativa_v7_0/LOC_Os05g26940.1	LOC_Os05g26940.1	O.sativa v7.0	3.73e-31	30	316	+/+	seq.submitted 2021-10-26T22:00:42.126Z UTC	2	307	16	302	125.946	96	148	39	523	452
	phytozome-next.jgi.doe.gov/report/protein/Osativa_v7_0/LOC_Os01g35184.1	LOC_Os01g35184.1	O.sativa v7.0	3.78e-31	31	314	+/+	seq.submitted 2021-10-26T22:00:42.126Z UTC	1	307	2	267	125.946	98	149	55	523	447
	phytozome-next.jgi.doe.gov/report/protein/Osativa_v7_0/LOC_Os01g35184.2	LOC_Os01g35184.2	O.sativa v7.0	3.78e-31	31	314	+/+	seq.submitted 2021-10-26T22:00:42.126Z UTC	1	307	2	267	125.946	98	149	55	523	447
	phytozome-next.jgi.doe.gov/report/protein/Osativa_v7_0/LOC_Os05g43840.1	LOC_Os05g43840.1	O.sativa v7.0	3.85e-31	33	224	+/+	seq.submitted 2021-10-26T22:00:42.126Z UTC	88	307	82	292	126.716	75	121	17	523	509
	phytozome-next.jgi.doe.gov/report/protein/Osativa_v7_0/LOC_Os04g59450.1	LOC_Os04g59450.1	O.sativa v7.0	4.29e-31	36	218	+/+	seq.submitted 2021-10-26T22:00:42.126Z UTC	94	305	45	259	124.405	79	112	9	523	371
	phytozome-next.jgi.doe.gov/report/protein/Osativa_v7_0/LOC_Os03g22050.4	LOC_Os03g22050.4	O.sativa v7.0	4.3e-31	31	305	+/+	seq.submitted 2021-10-26T22:00:42.126Z UTC	8	307	9	268	125.561	95	146	50	523	440
	phytozome-next.jgi.doe.gov/report/protein/Osativa_v7_0/LOC_Os03g22050.3	LOC_Os03g22050.3	O.sativa v7.0	6.85e-31	31	305	+/+	seq.submitted 2021-10-26T22:00:42.126Z UTC	8	307	9	268	125.176	95	146	50	523	452
	phytozome-next.jgi.doe.gov/report/protein/Osativa_v7_0/LOC_Os03g22050.1	LOC_Os03g22050.1	O.sativa v7.0	6.85e-31	31	305	+/+	seq.submitted 2021-10-26T22:00:42.126Z UTC	8	307	9	268	125.176	95	146	50	523	452
	phytozome-next.jgi.doe.gov/report/protein/Osativa_v7_0/LOC_Os03g22050.2	LOC_Os03g22050.2	O.sativa v7.0	6.85e-31	31	305	+/+	seq.submitted 2021-10-26T22:00:42.126Z UTC	8	307	9	268	125.176	95	146	50	523	452
	phytozome-next.jgi.doe.gov/report/protein/Osativa_v7_0/LOC_Os01g55450.1	LOC_Os01g55450.1	O.sativa v7.0	8.83e-31	35	225	+/+	seq.submitted 2021-10-26T22:00:42.126Z UTC	87	307	90	301	126.331	78	119	17	523	541
	phytozome-next.jgi.doe.gov/report/protein/Osativa_v7_0/LOC_Os02g41580.1	LOC_Os02g41580.1	O.sativa v7.0	9.11e-31	31	311	+/+	seq.submitted 2021-10-26T22:00:42.126Z UTC	7	306	17	292	122.094	95	159	46	523	306
	phytozome-next.jgi.doe.gov/report/protein/Osativa_v7_0/LOC_Os01g64970.1	LOC_Os01g64970.1	O.sativa v7.0	1.08e-30	36	218	+/+	seq.submitted 2021-10-26T22:00:42.126Z UTC	94	305	45	259	123.25	79	111	9	523	361
	phytozome-next.jgi.doe.gov/report/protein/Osativa_v7_0/LOC_Os03g20380.3	LOC_Os03g20380.3	O.sativa v7.0	2.17e-30	34	239	+/+	seq.submitted 2021-10-26T22:00:42.126Z UTC	83	307	46	276	122.479	82	124	22	523	382
	phytozome-next.jgi.doe.gov/report/protein/Osativa_v7_0/LOC_Os01g10870.1	LOC_Os01g10870.1	O.sativa v7.0	2.97e-30	34	224	+/+	seq.submitted 2021-10-26T22:00:42.126Z UTC	88	307	70	280	124.405	76	119	17	523	512
	phytozome-next.jgi.doe.gov/report/protein/Osativa_v7_0/LOC_Os01g18800.3	LOC_Os01g18800.3	O.sativa v7.0	3.87e-30	36	207	+/+	seq.submitted 2021-10-26T22:00:42.126Z UTC	105	307	76	275	121.709	74	115	11	523	374
	phytozome-next.jgi.doe.gov/report/protein/Osativa_v7_0/LOC_Os12g02200.2	LOC_Os12g02200.2	O.sativa v7.0	3.92e-30	34	225	+/+	seq.submitted 2021-10-26T22:00:42.126Z UTC	88	307	57	268	122.865	76	121	18	523	440
	Paralogs	Protein/Splice variants	Species	E-value	% identity	Align len	Strands	Query ID	Query from	Query to	Target from	Target to	Bitscore
	1	LOC_Os05g41090.1	O.sativa v7.0	0	70	519	+/+	seq.submitted 2021-10-26T22:00:42.126Z UTC	5	523	6	515	744.577

## Sheet: Triticum
	Views	Protein	Species	E-value	% identity	Align len	Strands	Query ID	Query from	Query to	Target from	Target to	Bitscore	# identical	Positives	Gaps	Query len	Target len
	phytozome-next.jgi.doe.gov/report/protein/Taestivum_v2_2/Traes_1DL_C3C98B159.2	Traes_1DL_C3C98B159.2	T.aestivum v2.2	0	70	519	+/+	seq.submitted 2021-10-26T22:04:34.533Z UTC	5	523	6	519	757.673	363	440	5	523	523
	phytozome-next.jgi.doe.gov/report/protein/Taestivum_v2_2/Traes_1DL_C3C98B159.1	Traes_1DL_C3C98B159.1	T.aestivum v2.2	0	70	519	+/+	seq.submitted 2021-10-26T22:04:34.533Z UTC	5	523	6	519	757.673	363	440	5	523	523
	phytozome-next.jgi.doe.gov/report/protein/Taestivum_v2_2/Traes_1DL_C3C98B159.3	Traes_1DL_C3C98B159.3	T.aestivum v2.2	0	70	519	+/+	seq.submitted 2021-10-26T22:04:34.533Z UTC	5	523	6	519	757.673	363	440	5	523	523
	phytozome-next.jgi.doe.gov/report/protein/Taestivum_v2_2/Traes_1BL_30ECC5A18.1	Traes_1BL_30ECC5A18.1	T.aestivum v2.2	0	70	520	+/+	seq.submitted 2021-10-26T22:04:34.533Z UTC	5	523	6	517	754.592	364	440	9	523	521
	phytozome-next.jgi.doe.gov/report/protein/Taestivum_v2_2/Traes_1AL_7FE24229E.1	Traes_1AL_7FE24229E.1	T.aestivum v2.2	0	70	520	+/+	seq.submitted 2021-10-26T22:04:34.533Z UTC	5	523	6	517	753.051	363	440	9	523	521
	phytozome-next.jgi.doe.gov/report/protein/Taestivum_v2_2/Traes_1AL_7FE24229E.5	Traes_1AL_7FE24229E.5	T.aestivum v2.2	0	70	520	+/+	seq.submitted 2021-10-26T22:04:34.533Z UTC	5	523	6	517	752.281	363	440	9	523	528
	phytozome-next.jgi.doe.gov/report/protein/Taestivum_v2_2/Traes_1BL_30ECC5A18.4	Traes_1BL_30ECC5A18.4	T.aestivum v2.2	9.98e-121	76	220	+/+	seq.submitted 2021-10-26T22:04:34.533Z UTC	304	523	3	222	355.91	167	195	0	523	226
	phytozome-next.jgi.doe.gov/report/protein/Taestivum_v2_2/Traes_1BL_30ECC5A18.3	Traes_1BL_30ECC5A18.3	T.aestivum v2.2	9.98e-121	76	220	+/+	seq.submitted 2021-10-26T22:04:34.533Z UTC	304	523	3	222	355.91	167	195	0	523	226
	phytozome-next.jgi.doe.gov/report/protein/Taestivum_v2_2/Traes_1BL_30ECC5A18.2	Traes_1BL_30ECC5A18.2	T.aestivum v2.2	9.98e-121	76	220	+/+	seq.submitted 2021-10-26T22:04:34.533Z UTC	304	523	3	222	355.91	167	195	0	523	226
	phytozome-next.jgi.doe.gov/report/protein/Taestivum_v2_2/Traes_1DL_C3C98B159.4	Traes_1DL_C3C98B159.4	T.aestivum v2.2	3.84e-120	75	220	+/+	seq.submitted 2021-10-26T22:04:34.533Z UTC	304	523	3	222	354.369	166	195	0	523	226
	phytozome-next.jgi.doe.gov/report/protein/Taestivum_v2_2/Traes_5DL_321243AA8.1	Traes_5DL_321243AA8.1	T.aestivum v2.2	2.39e-76	37	417	+/+	seq.submitted 2021-10-26T22:04:34.533Z UTC	101	509	3	389	248.825	155	230	38	523	418
	phytozome-next.jgi.doe.gov/report/protein/Taestivum_v2_2/Traes_4BS_9E2145C02.1	Traes_4BS_9E2145C02.1	T.aestivum v2.2	2.43e-76	35	451	+/+	seq.submitted 2021-10-26T22:04:34.533Z UTC	64	512	67	488	251.521	159	236	31	523	514
	phytozome-next.jgi.doe.gov/report/protein/Taestivum_v2_2/Traes_4BS_9E2145C02.2	Traes_4BS_9E2145C02.2	T.aestivum v2.2	2.43e-76	35	451	+/+	seq.submitted 2021-10-26T22:04:34.533Z UTC	64	512	67	488	251.521	159	236	31	523	514
	phytozome-next.jgi.doe.gov/report/protein/Taestivum_v2_2/Traes_4AL_D787CF1CC.1	Traes_4AL_D787CF1CC.1	T.aestivum v2.2	2.81e-76	35	451	+/+	seq.submitted 2021-10-26T22:04:34.533Z UTC	64	512	67	488	251.521	159	236	31	523	514
	phytozome-next.jgi.doe.gov/report/protein/Taestivum_v2_2/Traes_4AL_D787CF1CC.2	Traes_4AL_D787CF1CC.2	T.aestivum v2.2	2.81e-76	35	451	+/+	seq.submitted 2021-10-26T22:04:34.533Z UTC	64	512	67	488	251.521	159	236	31	523	514
	phytozome-next.jgi.doe.gov/report/protein/Taestivum_v2_2/Traes_3B_A930AA6E9.1	Traes_3B_A930AA6E9.1	T.aestivum v2.2	3.03e-76	36	422	+/+	seq.submitted 2021-10-26T22:04:34.533Z UTC	97	509	58	447	249.98	150	224	41	523	464
	phytozome-next.jgi.doe.gov/report/protein/Taestivum_v2_2/Traes_4DS_1E47439C6.2	Traes_4DS_1E47439C6.2	T.aestivum v2.2	4.05e-76	35	451	+/+	seq.submitted 2021-10-26T22:04:34.533Z UTC	64	512	68	489	251.136	159	236	31	523	515
	phytozome-next.jgi.doe.gov/report/protein/Taestivum_v2_2/Traes_4DS_1E47439C6.1	Traes_4DS_1E47439C6.1	T.aestivum v2.2	4.05e-76	35	451	+/+	seq.submitted 2021-10-26T22:04:34.533Z UTC	64	512	68	489	251.136	159	236	31	523	515
	phytozome-next.jgi.doe.gov/report/protein/Taestivum_v2_2/Traes_3B_C0F0C4EE3.1	Traes_3B_C0F0C4EE3.1	T.aestivum v2.2	5.99e-75	34	419	+/+	seq.submitted 2021-10-26T22:04:34.533Z UTC	97	511	66	457	246.899	143	229	31	523	469
	phytozome-next.jgi.doe.gov/report/protein/Taestivum_v2_2/Traes_5BS_4CBFAE917.1	Traes_5BS_4CBFAE917.1	T.aestivum v2.2	3.35e-74	34	453	+/+	seq.submitted 2021-10-26T22:04:34.533Z UTC	64	512	64	485	246.128	156	238	35	523	521
	phytozome-next.jgi.doe.gov/report/protein/Taestivum_v2_2/Traes_5DS_69B96465C.1	Traes_5DS_69B96465C.1	T.aestivum v2.2	6.17e-74	34	453	+/+	seq.submitted 2021-10-26T22:04:34.533Z UTC	64	512	64	485	245.743	156	237	35	523	521
	phytozome-next.jgi.doe.gov/report/protein/Taestivum_v2_2/Traes_5BL_B98442666.4	Traes_5BL_B98442666.4	T.aestivum v2.2	1.05e-73	37	423	+/+	seq.submitted 2021-10-26T22:04:34.533Z UTC	97	511	290	682	249.595	155	234	38	523	709
	phytozome-next.jgi.doe.gov/report/protein/Taestivum_v2_2/Traes_5BL_B98442666.5	Traes_5BL_B98442666.5	T.aestivum v2.2	1.05e-73	37	423	+/+	seq.submitted 2021-10-26T22:04:34.533Z UTC	97	511	290	682	249.595	155	234	38	523	709
	phytozome-next.jgi.doe.gov/report/protein/Taestivum_v2_2/Traes_5BL_B98442666.1	Traes_5BL_B98442666.1	T.aestivum v2.2	1.18e-73	37	423	+/+	seq.submitted 2021-10-26T22:04:34.533Z UTC	97	511	297	689	249.595	155	234	38	523	716
	phytozome-next.jgi.doe.gov/report/protein/Taestivum_v2_2/Traes_5AS_25D218AB9.2	Traes_5AS_25D218AB9.2	T.aestivum v2.2	1.68e-73	35	418	+/+	seq.submitted 2021-10-26T22:04:34.533Z UTC	99	512	1	390	241.506	148	223	32	523	426
	phytozome-next.jgi.doe.gov/report/protein/Taestivum_v2_2/Traes_4BS_D7E5E888B.1	Traes_4BS_D7E5E888B.1	T.aestivum v2.2	3.7e-72	33	420	+/+	seq.submitted 2021-10-26T22:04:34.533Z UTC	97	512	58	450	239.195	140	227	31	523	467
	phytozome-next.jgi.doe.gov/report/protein/Taestivum_v2_2/Traes_5DL_E4E401B4C.1	Traes_5DL_E4E401B4C.1	T.aestivum v2.2	6.29e-72	36	419	+/+	seq.submitted 2021-10-26T22:04:34.533Z UTC	99	509	1	387	237.269	149	225	40	523	413
	phytozome-next.jgi.doe.gov/report/protein/Taestivum_v2_2/Traes_5DL_701598D5F.1	Traes_5DL_701598D5F.1	T.aestivum v2.2	8.58e-72	33	454	+/+	seq.submitted 2021-10-26T22:04:34.533Z UTC	66	512	105	526	240.35	150	241	39	523	542
	phytozome-next.jgi.doe.gov/report/protein/Taestivum_v2_2/Traes_4AL_E0E01F494.1	Traes_4AL_E0E01F494.1	T.aestivum v2.2	1.27e-71	33	420	+/+	seq.submitted 2021-10-26T22:04:34.533Z UTC	97	512	58	450	238.039	140	225	31	523	467
	phytozome-next.jgi.doe.gov/report/protein/Taestivum_v2_2/Traes_5DL_321243AA8.3	Traes_5DL_321243AA8.3	T.aestivum v2.2	4.47e-71	38	369	+/+	seq.submitted 2021-10-26T22:04:34.533Z UTC	101	461	3	347	234.572	142	206	32	523	406
	phytozome-next.jgi.doe.gov/report/protein/Taestivum_v2_2/Traes_5DL_E4E401B4C.3	Traes_5DL_E4E401B4C.3	T.aestivum v2.2	6.49e-71	35	419	+/+	seq.submitted 2021-10-26T22:04:34.533Z UTC	99	509	1	387	234.572	148	224	40	523	413
	phytozome-next.jgi.doe.gov/report/protein/Taestivum_v2_2/Traes_5DL_E4E401B4C.2	Traes_5DL_E4E401B4C.2	T.aestivum v2.2	6.49e-71	35	419	+/+	seq.submitted 2021-10-26T22:04:34.533Z UTC	99	509	1	387	234.572	148	224	40	523	413
	phytozome-next.jgi.doe.gov/report/protein/Taestivum_v2_2/Traes_4DS_8102D96DE1.1	Traes_4DS_8102D96DE1.1	T.aestivum v2.2	8.19e-71	33	419	+/+	seq.submitted 2021-10-26T22:04:34.533Z UTC	97	512	124	515	237.654	140	223	30	523	532
	phytozome-next.jgi.doe.gov/report/protein/Taestivum_v2_2/Traes_4DS_8102D96DE.1	Traes_4DS_8102D96DE.1	T.aestivum v2.2	8.19e-71	33	419	+/+	seq.submitted 2021-10-26T22:04:34.533Z UTC	97	512	124	515	237.654	140	223	30	523	532
	phytozome-next.jgi.doe.gov/report/protein/Taestivum_v2_2/Traes_5DL_321243AA8.2	Traes_5DL_321243AA8.2	T.aestivum v2.2	9.84e-71	38	369	+/+	seq.submitted 2021-10-26T22:04:34.533Z UTC	101	461	3	347	234.187	142	206	32	523	419
	phytozome-next.jgi.doe.gov/report/protein/Taestivum_v2_2/Traes_2BL_4265025D3.1	Traes_2BL_4265025D3.1	T.aestivum v2.2	1.43e-70	35	425	+/+	seq.submitted 2021-10-26T22:04:34.533Z UTC	95	509	1	394	233.032	148	216	41	523	397
	phytozome-next.jgi.doe.gov/report/protein/Taestivum_v2_2/Traes_5BL_CEF07DD75.1	Traes_5BL_CEF07DD75.1	T.aestivum v2.2	1.83e-70	34	426	+/+	seq.submitted 2021-10-26T22:04:34.533Z UTC	95	512	127	524	236.884	144	230	36	523	540
	phytozome-next.jgi.doe.gov/report/protein/Taestivum_v2_2/Traes_5BL_CEF07DD751.1	Traes_5BL_CEF07DD751.1	T.aestivum v2.2	1.83e-70	34	426	+/+	seq.submitted 2021-10-26T22:04:34.533Z UTC	95	512	127	524	236.884	144	230	36	523	540
	phytozome-next.jgi.doe.gov/report/protein/Taestivum_v2_2/Traes_2DS_E10233A82.1	Traes_2DS_E10233A82.1	T.aestivum v2.2	2.11e-70	33	415	+/+	seq.submitted 2021-10-26T22:04:34.533Z UTC	97	508	135	522	236.498	138	225	30	523	533
	phytozome-next.jgi.doe.gov/report/protein/Taestivum_v2_2/Traes_2DS_E10233A82.2	Traes_2DS_E10233A82.2	T.aestivum v2.2	2.11e-70	33	415	+/+	seq.submitted 2021-10-26T22:04:34.533Z UTC	97	508	135	522	236.498	138	225	30	523	533
	phytozome-next.jgi.doe.gov/report/protein/Taestivum_v2_2/Traes_2BS_6B6C8A542.4	Traes_2BS_6B6C8A542.4	T.aestivum v2.2	2.11e-70	33	415	+/+	seq.submitted 2021-10-26T22:04:34.533Z UTC	97	508	135	522	236.498	138	225	30	523	533
	phytozome-next.jgi.doe.gov/report/protein/Taestivum_v2_2/Traes_2BS_6B6C8A542.3	Traes_2BS_6B6C8A542.3	T.aestivum v2.2	2.11e-70	33	415	+/+	seq.submitted 2021-10-26T22:04:34.533Z UTC	97	508	135	522	236.498	138	225	30	523	533
	phytozome-next.jgi.doe.gov/report/protein/Taestivum_v2_2/Traes_2BS_6B6C8A542.2	Traes_2BS_6B6C8A542.2	T.aestivum v2.2	2.11e-70	33	415	+/+	seq.submitted 2021-10-26T22:04:34.533Z UTC	97	508	135	522	236.498	138	225	30	523	533
	phytozome-next.jgi.doe.gov/report/protein/Taestivum_v2_2/Traes_2BS_6B6C8A542.1	Traes_2BS_6B6C8A542.1	T.aestivum v2.2	2.11e-70	33	415	+/+	seq.submitted 2021-10-26T22:04:34.533Z UTC	97	508	135	522	236.498	138	225	30	523	533
	phytozome-next.jgi.doe.gov/report/protein/Taestivum_v2_2/Traes_2AS_FACC395EF.3	Traes_2AS_FACC395EF.3	T.aestivum v2.2	2.47e-70	33	415	+/+	seq.submitted 2021-10-26T22:04:34.533Z UTC	97	508	135	522	236.498	138	225	30	523	533
	phytozome-next.jgi.doe.gov/report/protein/Taestivum_v2_2/Traes_2AS_FACC395EF.4	Traes_2AS_FACC395EF.4	T.aestivum v2.2	2.47e-70	33	415	+/+	seq.submitted 2021-10-26T22:04:34.533Z UTC	97	508	135	522	236.498	138	225	30	523	533
	phytozome-next.jgi.doe.gov/report/protein/Taestivum_v2_2/Traes_2AS_FACC395EF.1	Traes_2AS_FACC395EF.1	T.aestivum v2.2	2.47e-70	33	415	+/+	seq.submitted 2021-10-26T22:04:34.533Z UTC	97	508	135	522	236.498	138	225	30	523	533
	phytozome-next.jgi.doe.gov/report/protein/Taestivum_v2_2/Traes_2AS_FACC395EF.2	Traes_2AS_FACC395EF.2	T.aestivum v2.2	2.47e-70	33	415	+/+	seq.submitted 2021-10-26T22:04:34.533Z UTC	97	508	135	522	236.498	138	225	30	523	533
	phytozome-next.jgi.doe.gov/report/protein/Taestivum_v2_2/Traes_1DL_C3C98B159.5	Traes_1DL_C3C98B159.5	T.aestivum v2.2	8.75e-70	70	149	+/+	seq.submitted 2021-10-26T22:04:34.533Z UTC	299	447	5	153	223.016	104	128	0	523	168
	phytozome-next.jgi.doe.gov/report/protein/Taestivum_v2_2/Traes_5BL_8B7A2A3FE.1	Traes_5BL_8B7A2A3FE.1	T.aestivum v2.2	9.39e-70	36	435	+/+	seq.submitted 2021-10-26T22:04:34.533Z UTC	87	509	159	561	236.113	155	233	44	523	587
	phytozome-next.jgi.doe.gov/report/protein/Taestivum_v2_2/Traes_5DL_ADFFAE33D.2	Traes_5DL_ADFFAE33D.2	T.aestivum v2.2	2.64e-69	33	412	+/+	seq.submitted 2021-10-26T22:04:34.533Z UTC	98	508	26	415	231.491	135	213	23	523	451
	phytozome-next.jgi.doe.gov/report/protein/Taestivum_v2_2/Traes_5DL_ADFFAE33D.1	Traes_5DL_ADFFAE33D.1	T.aestivum v2.2	2.64e-69	33	412	+/+	seq.submitted 2021-10-26T22:04:34.533Z UTC	98	508	26	415	231.491	135	213	23	523	451
	phytozome-next.jgi.doe.gov/report/protein/Taestivum_v2_2/Traes_5BL_35A6B4387.1	Traes_5BL_35A6B4387.1	T.aestivum v2.2	2.7e-68	33	412	+/+	seq.submitted 2021-10-26T22:04:34.533Z UTC	98	508	111	500	230.335	134	212	23	523	501
	phytozome-next.jgi.doe.gov/report/protein/Taestivum_v2_2/Traes_4BS_D7E5E888B.3	Traes_4BS_D7E5E888B.3	T.aestivum v2.2	2.23e-67	33	403	+/+	seq.submitted 2021-10-26T22:04:34.533Z UTC	97	495	58	433	226.098	135	216	31	523	439
	phytozome-next.jgi.doe.gov/report/protein/Taestivum_v2_2/Traes_2BL_4DA0C4B30.2	Traes_2BL_4DA0C4B30.2	T.aestivum v2.2	4.08e-67	36	417	+/+	seq.submitted 2021-10-26T22:04:34.533Z UTC	97	509	154	542	228.794	152	225	32	523	567
	phytozome-next.jgi.doe.gov/report/protein/Taestivum_v2_2/Traes_2BL_4DA0C4B30.1	Traes_2BL_4DA0C4B30.1	T.aestivum v2.2	4.08e-67	36	417	+/+	seq.submitted 2021-10-26T22:04:34.533Z UTC	97	509	154	542	228.794	152	225	32	523	567
	phytozome-next.jgi.doe.gov/report/protein/Taestivum_v2_2/Traes_2BL_2141AFC9E.2	Traes_2BL_2141AFC9E.2	T.aestivum v2.2	4.41e-67	35	417	+/+	seq.submitted 2021-10-26T22:04:34.533Z UTC	99	509	1	387	224.557	145	218	36	523	413
	phytozome-next.jgi.doe.gov/report/protein/Taestivum_v2_2/Traes_2BL_4265025D3.2	Traes_2BL_4265025D3.2	T.aestivum v2.2	5.68e-67	36	372	+/+	seq.submitted 2021-10-26T22:04:34.533Z UTC	95	461	1	353	223.402	135	195	24	523	386
	phytozome-next.jgi.doe.gov/report/protein/Taestivum_v2_2/Traes_4DL_052000A28.1	Traes_4DL_052000A28.1	T.aestivum v2.2	6.55e-67	35	431	+/+	seq.submitted 2021-10-26T22:04:34.533Z UTC	97	523	104	504	227.254	153	222	34	523	522
	phytozome-next.jgi.doe.gov/report/protein/Taestivum_v2_2/Traes_4BS_D7E5E888B.2	Traes_4BS_D7E5E888B.2	T.aestivum v2.2	9.7e-67	35	374	+/+	seq.submitted 2021-10-26T22:04:34.533Z UTC	97	466	124	477	226.098	130	206	24	523	501
	phytozome-next.jgi.doe.gov/report/protein/Taestivum_v2_2/Traes_4DL_052000A28.2	Traes_4DL_052000A28.2	T.aestivum v2.2	1.81e-66	35	431	+/+	seq.submitted 2021-10-26T22:04:34.533Z UTC	97	523	131	531	226.483	153	222	34	523	549
	phytozome-next.jgi.doe.gov/report/protein/Taestivum_v2_2/Traes_4DS_8102D96DE1.2	Traes_4DS_8102D96DE1.2	T.aestivum v2.2	3.85e-66	34	402	+/+	seq.submitted 2021-10-26T22:04:34.533Z UTC	97	495	124	498	224.557	135	212	30	523	503
	phytozome-next.jgi.doe.gov/report/protein/Taestivum_v2_2/Traes_4DS_8102D96DE.2	Traes_4DS_8102D96DE.2	T.aestivum v2.2	3.85e-66	34	402	+/+	seq.submitted 2021-10-26T22:04:34.533Z UTC	97	495	124	498	224.557	135	212	30	523	503
	phytozome-next.jgi.doe.gov/report/protein/Taestivum_v2_2/Traes_2BS_4F489C2B9.1	Traes_2BS_4F489C2B9.1	T.aestivum v2.2	1.26e-65	32	511	+/+	seq.submitted 2021-10-26T22:04:34.533Z UTC	6	508	62	507	224.172	161	254	73	523	544
	phytozome-next.jgi.doe.gov/report/protein/Taestivum_v2_2/Traes_2AS_6DA49285E.1	Traes_2AS_6DA49285E.1	T.aestivum v2.2	3.9e-65	33	418	+/+	seq.submitted 2021-10-26T22:04:34.533Z UTC	99	508	1	388	219.55	140	221	38	523	425
	phytozome-next.jgi.doe.gov/report/protein/Taestivum_v2_2/Traes_6DL_8828FB150.1	Traes_6DL_8828FB150.1	T.aestivum v2.2	2.46e-64	34	419	+/+	seq.submitted 2021-10-26T22:04:34.533Z UTC	99	509	1	387	217.238	143	216	40	523	408
	phytozome-next.jgi.doe.gov/report/protein/Taestivum_v2_2/Traes_3B_C7F6BF696.1	Traes_3B_C7F6BF696.1	T.aestivum v2.2	9.61e-64	33	406	+/+	seq.submitted 2021-10-26T22:04:34.533Z UTC	107	508	9	388	216.083	136	212	30	523	424
	phytozome-next.jgi.doe.gov/report/protein/Taestivum_v2_2/Traes_5BL_35A6B4387.3	Traes_5BL_35A6B4387.3	T.aestivum v2.2	9.68e-64	33	369	+/+	seq.submitted 2021-10-26T22:04:34.533Z UTC	98	465	111	462	218.394	123	193	18	523	510
	phytozome-next.jgi.doe.gov/report/protein/Taestivum_v2_2/Traes_5BL_35A6B4387.2	Traes_5BL_35A6B4387.2	T.aestivum v2.2	3.04e-63	33	369	+/+	seq.submitted 2021-10-26T22:04:34.533Z UTC	98	465	111	462	218.394	123	193	18	523	557
	phytozome-next.jgi.doe.gov/report/protein/Taestivum_v2_2/Traes_5AL_F82860F37.1	Traes_5AL_F82860F37.1	T.aestivum v2.2	3.63e-63	35	431	+/+	seq.submitted 2021-10-26T22:04:34.533Z UTC	97	523	104	504	217.238	153	221	34	523	522
	phytozome-next.jgi.doe.gov/report/protein/Taestivum_v2_2/Traes_5AS_25D218AB9.3	Traes_5AS_25D218AB9.3	T.aestivum v2.2	6.01e-63	40	295	+/+	seq.submitted 2021-10-26T22:04:34.533Z UTC	99	392	1	275	209.92	119	167	21	523	302
	phytozome-next.jgi.doe.gov/report/protein/Taestivum_v2_2/Traes_3B_C0F0C4EE3.3	Traes_3B_C0F0C4EE3.3	T.aestivum v2.2	1.21e-62	38	304	+/+	seq.submitted 2021-10-26T22:04:34.533Z UTC	97	399	66	349	212.231	115	176	21	523	396
	phytozome-next.jgi.doe.gov/report/protein/Taestivum_v2_2/Traes_3B_C0F0C4EE3.2	Traes_3B_C0F0C4EE3.2	T.aestivum v2.2	2.74e-62	38	297	+/+	seq.submitted 2021-10-26T22:04:34.533Z UTC	97	392	66	342	211.846	114	174	21	523	412
	phytozome-next.jgi.doe.gov/report/protein/Taestivum_v2_2/Traes_5DL_321243AA8.4	Traes_5DL_321243AA8.4	T.aestivum v2.2	3.59e-62	42	289	+/+	seq.submitted 2021-10-26T22:04:34.533Z UTC	101	384	3	267	207.994	120	170	29	523	298
	phytozome-next.jgi.doe.gov/report/protein/Taestivum_v2_2/Traes_4DL_052000A28.4	Traes_4DL_052000A28.4	T.aestivum v2.2	5.16e-62	36	401	+/+	seq.submitted 2021-10-26T22:04:34.533Z UTC	99	495	1	373	209.92	143	203	32	523	376
	phytozome-next.jgi.doe.gov/report/protein/Taestivum_v2_2/Traes_2DS_E10233A82.3	Traes_2DS_E10233A82.3	T.aestivum v2.2	7.03e-62	34	360	+/+	seq.submitted 2021-10-26T22:04:34.533Z UTC	97	453	135	474	212.616	124	194	23	523	485
	phytozome-next.jgi.doe.gov/report/protein/Taestivum_v2_2/Traes_2AL_4D3642D87.1	Traes_2AL_4D3642D87.1	T.aestivum v2.2	1.91e-61	34	392	+/+	seq.submitted 2021-10-26T22:04:34.533Z UTC	125	509	1	361	207.994	135	195	38	523	364
	phytozome-next.jgi.doe.gov/report/protein/Taestivum_v2_2/Traes_4DL_052000A28.3	Traes_4DL_052000A28.3	T.aestivum v2.2	2.18e-61	36	404	+/+	seq.submitted 2021-10-26T22:04:34.533Z UTC	97	496	131	506	212.231	144	205	32	523	515
	phytozome-next.jgi.doe.gov/report/protein/Taestivum_v2_2/Traes_5BS_DA5941467.1	Traes_5BS_DA5941467.1	T.aestivum v2.2	4.02e-61	29	510	+/+	seq.submitted 2021-10-26T22:04:34.533Z UTC	5	508	65	508	212.616	150	250	72	523	558
	phytozome-next.jgi.doe.gov/report/protein/Taestivum_v2_2/Traes_6DL_8828FB150.6	Traes_6DL_8828FB150.6	T.aestivum v2.2	1.95e-60	35	371	+/+	seq.submitted 2021-10-26T22:04:34.533Z UTC	99	461	1	347	205.682	131	195	32	523	374
	phytozome-next.jgi.doe.gov/report/protein/Taestivum_v2_2/Traes_6DL_8828FB150.5	Traes_6DL_8828FB150.5	T.aestivum v2.2	1.97e-60	35	371	+/+	seq.submitted 2021-10-26T22:04:34.533Z UTC	99	461	1	347	205.682	131	195	32	523	374
	phytozome-next.jgi.doe.gov/report/protein/Taestivum_v2_2/Traes_6DL_4DA973768.1	Traes_6DL_4DA973768.1	T.aestivum v2.2	2.4e-60	33	438	+/+	seq.submitted 2021-10-26T22:04:34.533Z UTC	97	509	126	533	210.69	143	219	55	523	562
	phytozome-next.jgi.doe.gov/report/protein/Taestivum_v2_2/Traes_6DL_8828FB150.4	Traes_6DL_8828FB150.4	T.aestivum v2.2	3.04e-60	35	371	+/+	seq.submitted 2021-10-26T22:04:34.533Z UTC	99	461	1	347	205.682	131	195	32	523	382
	phytozome-next.jgi.doe.gov/report/protein/Taestivum_v2_2/Traes_6DL_8828FB150.3	Traes_6DL_8828FB150.3	T.aestivum v2.2	4.45e-60	35	371	+/+	seq.submitted 2021-10-26T22:04:34.533Z UTC	99	461	1	347	205.297	131	195	32	523	387
	phytozome-next.jgi.doe.gov/report/protein/Taestivum_v2_2/Traes_5DS_8471D9E4E.4	Traes_5DS_8471D9E4E.4	T.aestivum v2.2	7.58e-60	40	305	+/+	seq.submitted 2021-10-26T22:04:34.533Z UTC	97	395	156	434	206.453	122	179	32	523	456
	phytozome-next.jgi.doe.gov/report/protein/Taestivum_v2_2/Traes_5DS_8471D9E4E.3	Traes_5DS_8471D9E4E.3	T.aestivum v2.2	7.68e-60	40	305	+/+	seq.submitted 2021-10-26T22:04:34.533Z UTC	97	395	155	433	206.453	122	179	32	523	457
	phytozome-next.jgi.doe.gov/report/protein/Taestivum_v2_2/Traes_2DS_E10233A82.6	Traes_2DS_E10233A82.6	T.aestivum v2.2	1.12e-59	36	323	+/+	seq.submitted 2021-10-26T22:04:34.533Z UTC	97	419	135	437	206.068	115	176	20	523	454
	phytozome-next.jgi.doe.gov/report/protein/Taestivum_v2_2/Traes_2DS_E10233A82.7	Traes_2DS_E10233A82.7	T.aestivum v2.2	1.12e-59	36	323	+/+	seq.submitted 2021-10-26T22:04:34.533Z UTC	97	419	135	437	206.068	115	176	20	523	454
	phytozome-next.jgi.doe.gov/report/protein/Taestivum_v2_2/Traes_2DS_E10233A82.4	Traes_2DS_E10233A82.4	T.aestivum v2.2	1.12e-59	36	323	+/+	seq.submitted 2021-10-26T22:04:34.533Z UTC	97	419	135	437	206.068	115	176	20	523	454
	phytozome-next.jgi.doe.gov/report/protein/Taestivum_v2_2/Traes_2DS_E10233A82.5	Traes_2DS_E10233A82.5	T.aestivum v2.2	1.12e-59	36	323	+/+	seq.submitted 2021-10-26T22:04:34.533Z UTC	97	419	135	437	206.068	115	176	20	523	454
	phytozome-next.jgi.doe.gov/report/protein/Taestivum_v2_2/Traes_5BS_9FE1E88B8.3	Traes_5BS_9FE1E88B8.3	T.aestivum v2.2	1.22e-59	40	305	+/+	seq.submitted 2021-10-26T22:04:34.533Z UTC	97	395	155	433	206.068	121	180	32	523	461
	phytozome-next.jgi.doe.gov/report/protein/Taestivum_v2_2/Traes_5DS_8471D9E4E.2	Traes_5DS_8471D9E4E.2	T.aestivum v2.2	2.12e-59	40	305	+/+	seq.submitted 2021-10-26T22:04:34.533Z UTC	97	395	208	486	206.838	122	179	32	523	506
	phytozome-next.jgi.doe.gov/report/protein/Taestivum_v2_2/Traes_5DS_8471D9E4E.1	Traes_5DS_8471D9E4E.1	T.aestivum v2.2	2.38e-59	40	305	+/+	seq.submitted 2021-10-26T22:04:34.533Z UTC	97	395	208	486	206.453	122	179	32	523	508
	phytozome-next.jgi.doe.gov/report/protein/Taestivum_v2_2/Traes_5BS_9FE1E88B8.2	Traes_5BS_9FE1E88B8.2	T.aestivum v2.2	2.97e-59	40	305	+/+	seq.submitted 2021-10-26T22:04:34.533Z UTC	97	395	208	486	206.453	121	180	32	523	518
	phytozome-next.jgi.doe.gov/report/protein/Taestivum_v2_2/Traes_4DS_63F7CF3CE.1	Traes_4DS_63F7CF3CE.1	T.aestivum v2.2	4.34e-59	34	408	+/+	seq.submitted 2021-10-26T22:04:34.533Z UTC	105	508	7	388	203.756	137	207	30	523	423
	phytozome-next.jgi.doe.gov/report/protein/Taestivum_v2_2/Traes_4DS_63F7CF3CE.3	Traes_4DS_63F7CF3CE.3	T.aestivum v2.2	4.38e-59	34	408	+/+	seq.submitted 2021-10-26T22:04:34.533Z UTC	105	508	7	388	203.756	137	207	30	523	423
	phytozome-next.jgi.doe.gov/report/protein/Taestivum_v2_2/Traes_4DS_63F7CF3CE.2	Traes_4DS_63F7CF3CE.2	T.aestivum v2.2	5.9e-59	34	408	+/+	seq.submitted 2021-10-26T22:04:34.533Z UTC	105	508	7	388	203.371	137	207	30	523	424
	phytozome-next.jgi.doe.gov/report/protein/Taestivum_v2_2/Traes_2BS_6B6C8A542.5	Traes_2BS_6B6C8A542.5	T.aestivum v2.2	6.12e-59	35	353	+/+	seq.submitted 2021-10-26T22:04:34.533Z UTC	97	443	135	459	204.142	124	186	34	523	461
	phytozome-next.jgi.doe.gov/report/protein/Taestivum_v2_2/Traes_5BS_9FE1E88B8.1	Traes_5BS_9FE1E88B8.1	T.aestivum v2.2	6.48e-59	39	305	+/+	seq.submitted 2021-10-26T22:04:34.533Z UTC	97	395	208	486	206.068	120	179	32	523	525
	phytozome-next.jgi.doe.gov/report/protein/Taestivum_v2_2/Traes_2DL_5B5665C69.1	Traes_2DL_5B5665C69.1	T.aestivum v2.2	2.45e-58	32	426	+/+	seq.submitted 2021-10-26T22:04:34.533Z UTC	95	509	1	393	201.06	137	202	44	523	396
	Paralogs	Protein/Splice variants	Species	E-value	% identity	Align len	Strands	Query ID	Query from	Query to	Target from	Target to	Bitscore
	1	Traes_1AL_7FE24229E.1	T.aestivum v2.2	0	70	520	+/+	seq.submitted 2021-10-26T22:04:34.533Z UTC	5	523	6	517	753.051
		Traes_1AL_7FE24229E.5	T.aestivum v2.2	0	70	520	+/+	seq.submitted 2021-10-26T22:04:34.533Z UTC	5	523	6	517	752.281
	2	Traes_1BL_30ECC5A18.1	T.aestivum v2.2	0	70	520	+/+	seq.submitted 2021-10-26T22:04:34.533Z UTC	5	523	6	517	754.592
		Traes_1BL_30ECC5A18.2	T.aestivum v2.2	9.98e-121	76	220	+/+	seq.submitted 2021-10-26T22:04:34.533Z UTC	304	523	3	222	355.91
		Traes_1BL_30ECC5A18.3	T.aestivum v2.2	9.98e-121	76	220	+/+	seq.submitted 2021-10-26T22:04:34.533Z UTC	304	523	3	222	355.91
		Traes_1BL_30ECC5A18.4	T.aestivum v2.2	9.98e-121	76	220	+/+	seq.submitted 2021-10-26T22:04:34.533Z UTC	304	523	3	222	355.91
	3	Traes_1DL_C3C98B159.1	T.aestivum v2.2	0	70	519	+/+	seq.submitted 2021-10-26T22:04:34.533Z UTC	5	523	6	519	757.673
		Traes_1DL_C3C98B159.2	T.aestivum v2.2	0	70	519	+/+	seq.submitted 2021-10-26T22:04:34.533Z UTC	5	523	6	519	757.673
		Traes_1DL_C3C98B159.3	T.aestivum v2.2	0	70	519	+/+	seq.submitted 2021-10-26T22:04:34.533Z UTC	5	523	6	519	757.673
		Traes_1DL_C3C98B159.4	T.aestivum v2.2	3.84e-120	75	220	+/+	seq.submitted 2021-10-26T22:04:34.533Z UTC	304	523	3	222	354.369

## Sheet: Hordeum
	Views	Protein	Species	E-value	% identity	Align len	Strands	Query ID	Query from	Query to	Target from	Target to	Bitscore	# identical	Positives	Gaps	Query len	Target len
	phytozome-next.jgi.doe.gov/report/protein/Hvulgare_r1/HORVU0Hr1G023280.14	HORVU0Hr1G023280.14	H.vulgare r1	0	70	522	+/+	seq.submitted 2021-10-26T22:05:40.605Z UTC	5	523	6	517	751.51	365	441	13	523	521
	phytozome-next.jgi.doe.gov/report/protein/Hvulgare_r1/HORVU0Hr1G023280.23	HORVU0Hr1G023280.23	H.vulgare r1	0	70	522	+/+	seq.submitted 2021-10-26T22:05:40.605Z UTC	5	523	6	517	751.125	365	441	13	523	527
	phytozome-next.jgi.doe.gov/report/protein/Hvulgare_r1/HORVU1Hr1G068660.2	HORVU1Hr1G068660.2	H.vulgare r1	0	70	522	+/+	seq.submitted 2021-10-26T22:05:40.605Z UTC	5	523	6	517	750.74	364	441	13	523	521
	phytozome-next.jgi.doe.gov/report/protein/Hvulgare_r1/HORVU0Hr1G023280.20	HORVU0Hr1G023280.20	H.vulgare r1	0	69	523	+/+	seq.submitted 2021-10-26T22:05:40.605Z UTC	5	523	6	518	739.569	362	439	14	523	522
	phytozome-next.jgi.doe.gov/report/protein/Hvulgare_r1/HORVU0Hr1G023280.15	HORVU0Hr1G023280.15	H.vulgare r1	0	68	466	+/+	seq.submitted 2021-10-26T22:05:40.605Z UTC	5	467	6	461	654.825	319	389	13	523	464
	phytozome-next.jgi.doe.gov/report/protein/Hvulgare_r1/HORVU0Hr1G023280.13	HORVU0Hr1G023280.13	H.vulgare r1	5.47e-139	74	261	+/+	seq.submitted 2021-10-26T22:05:40.605Z UTC	263	523	15	275	404.445	192	225	0	523	279
	phytozome-next.jgi.doe.gov/report/protein/Hvulgare_r1/HORVU1Hr1G068660.1	HORVU1Hr1G068660.1	H.vulgare r1	1.51e-135	66	296	+/+	seq.submitted 2021-10-26T22:05:40.605Z UTC	5	297	6	291	397.127	196	244	13	523	308
	phytozome-next.jgi.doe.gov/report/protein/Hvulgare_r1/HORVU0Hr1G023280.22	HORVU0Hr1G023280.22	H.vulgare r1	2.69e-135	66	296	+/+	seq.submitted 2021-10-26T22:05:40.605Z UTC	5	297	6	291	396.356	196	243	13	523	308
	phytozome-next.jgi.doe.gov/report/protein/Hvulgare_r1/HORVU0Hr1G023280.17	HORVU0Hr1G023280.17	H.vulgare r1	1.67e-133	66	298	+/+	seq.submitted 2021-10-26T22:05:40.605Z UTC	5	297	6	293	391.734	196	243	15	523	310
	phytozome-next.jgi.doe.gov/report/protein/Hvulgare_r1/HORVU0Hr1G023280.31	HORVU0Hr1G023280.31	H.vulgare r1	6.95e-122	75	225	+/+	seq.submitted 2021-10-26T22:05:40.605Z UTC	299	523	5	229	359.377	169	198	0	523	233
	phytozome-next.jgi.doe.gov/report/protein/Hvulgare_r1/HORVU0Hr1G023280.24	HORVU0Hr1G023280.24	H.vulgare r1	1.04e-120	76	220	+/+	seq.submitted 2021-10-26T22:05:40.605Z UTC	304	523	3	222	355.91	167	195	0	523	226
	phytozome-next.jgi.doe.gov/report/protein/Hvulgare_r1/HORVU0Hr1G023280.27	HORVU0Hr1G023280.27	H.vulgare r1	1.04e-120	76	220	+/+	seq.submitted 2021-10-26T22:05:40.605Z UTC	304	523	3	222	355.91	167	195	0	523	226
	phytozome-next.jgi.doe.gov/report/protein/Hvulgare_r1/HORVU1Hr1G068660.3	HORVU1Hr1G068660.3	H.vulgare r1	5e-120	75	220	+/+	seq.submitted 2021-10-26T22:05:40.605Z UTC	304	523	3	222	354.369	166	194	0	523	226
	phytozome-next.jgi.doe.gov/report/protein/Hvulgare_r1/HORVU0Hr1G023280.29	HORVU0Hr1G023280.29	H.vulgare r1	3.43e-117	75	220	+/+	seq.submitted 2021-10-26T22:05:40.605Z UTC	304	523	3	222	347.051	164	192	0	523	226
	phytozome-next.jgi.doe.gov/report/protein/Hvulgare_r1/HORVU0Hr1G023280.18	HORVU0Hr1G023280.18	H.vulgare r1	8.59e-111	68	244	+/+	seq.submitted 2021-10-26T22:05:40.605Z UTC	5	245	6	239	331.257	165	205	13	523	246
	phytozome-next.jgi.doe.gov/report/protein/Hvulgare_r1/HORVU0Hr1G023280.16	HORVU0Hr1G023280.16	H.vulgare r1	8.59e-111	68	244	+/+	seq.submitted 2021-10-26T22:05:40.605Z UTC	5	245	6	239	331.257	165	205	13	523	246
	phytozome-next.jgi.doe.gov/report/protein/Hvulgare_r1/HORVU0Hr1G023280.21	HORVU0Hr1G023280.21	H.vulgare r1	8.59e-111	68	244	+/+	seq.submitted 2021-10-26T22:05:40.605Z UTC	5	245	6	239	331.257	165	205	13	523	246
	phytozome-next.jgi.doe.gov/report/protein/Hvulgare_r1/HORVU0Hr1G023280.19	HORVU0Hr1G023280.19	H.vulgare r1	8.59e-111	68	244	+/+	seq.submitted 2021-10-26T22:05:40.605Z UTC	5	245	6	239	331.257	165	205	13	523	246
	phytozome-next.jgi.doe.gov/report/protein/Hvulgare_r1/HORVU0Hr1G023280.12	HORVU0Hr1G023280.12	H.vulgare r1	8.59e-111	68	244	+/+	seq.submitted 2021-10-26T22:05:40.605Z UTC	5	245	6	239	331.257	165	205	13	523	246
	phytozome-next.jgi.doe.gov/report/protein/Hvulgare_r1/HORVU0Hr1G023280.28	HORVU0Hr1G023280.28	H.vulgare r1	1.13e-83	74	163	+/+	seq.submitted 2021-10-26T22:05:40.605Z UTC	304	466	3	165	258.84	121	143	0	523	169
	phytozome-next.jgi.doe.gov/report/protein/Hvulgare_r1/HORVU1Hr1G092710.1	HORVU1Hr1G092710.1	H.vulgare r1	6.55e-78	36	423	+/+	seq.submitted 2021-10-26T22:05:40.605Z UTC	97	511	78	469	254.988	152	233	39	523	481
	phytozome-next.jgi.doe.gov/report/protein/Hvulgare_r1/HORVU4Hr1G019530.2	HORVU4Hr1G019530.2	H.vulgare r1	2.45e-76	35	451	+/+	seq.submitted 2021-10-26T22:05:40.605Z UTC	64	512	49	470	251.136	159	236	31	523	496
	phytozome-next.jgi.doe.gov/report/protein/Hvulgare_r1/HORVU4Hr1G019530.8	HORVU4Hr1G019530.8	H.vulgare r1	2.64e-76	35	448	+/+	seq.submitted 2021-10-26T22:05:40.605Z UTC	64	509	76	494	251.136	159	234	31	523	496
	phytozome-next.jgi.doe.gov/report/protein/Hvulgare_r1/HORVU4Hr1G019530.6	HORVU4Hr1G019530.6	H.vulgare r1	3.64e-76	35	451	+/+	seq.submitted 2021-10-26T22:05:40.605Z UTC	64	512	70	491	251.521	159	236	31	523	517
	phytozome-next.jgi.doe.gov/report/protein/Hvulgare_r1/HORVU4Hr1G019530.7	HORVU4Hr1G019530.7	H.vulgare r1	3.64e-76	35	451	+/+	seq.submitted 2021-10-26T22:05:40.605Z UTC	64	512	70	491	251.521	159	236	31	523	517
	phytozome-next.jgi.doe.gov/report/protein/Hvulgare_r1/HORVU4Hr1G019530.1	HORVU4Hr1G019530.1	H.vulgare r1	3.64e-76	35	451	+/+	seq.submitted 2021-10-26T22:05:40.605Z UTC	64	512	70	491	251.521	159	236	31	523	517
	phytozome-next.jgi.doe.gov/report/protein/Hvulgare_r1/HORVU4Hr1G019530.4	HORVU4Hr1G019530.4	H.vulgare r1	3.64e-76	35	451	+/+	seq.submitted 2021-10-26T22:05:40.605Z UTC	64	512	70	491	251.521	159	236	31	523	517
	phytozome-next.jgi.doe.gov/report/protein/Hvulgare_r1/HORVU4Hr1G019530.3	HORVU4Hr1G019530.3	H.vulgare r1	3.64e-76	35	451	+/+	seq.submitted 2021-10-26T22:05:40.605Z UTC	64	512	70	491	251.521	159	236	31	523	517
	phytozome-next.jgi.doe.gov/report/protein/Hvulgare_r1/HORVU3Hr1G079040.5	HORVU3Hr1G079040.5	H.vulgare r1	3.21e-75	35	418	+/+	seq.submitted 2021-10-26T22:05:40.605Z UTC	97	509	47	438	246.899	146	223	31	523	455
	phytozome-next.jgi.doe.gov/report/protein/Hvulgare_r1/HORVU3Hr1G079040.1	HORVU3Hr1G079040.1	H.vulgare r1	2.05e-74	35	420	+/+	seq.submitted 2021-10-26T22:05:40.605Z UTC	97	511	115	507	246.899	147	225	32	523	522
	phytozome-next.jgi.doe.gov/report/protein/Hvulgare_r1/HORVU5Hr1G032550.5	HORVU5Hr1G032550.5	H.vulgare r1	6.25e-74	34	453	+/+	seq.submitted 2021-10-26T22:05:40.605Z UTC	64	512	64	485	245.743	156	237	35	523	521
	phytozome-next.jgi.doe.gov/report/protein/Hvulgare_r1/HORVU5Hr1G032550.3	HORVU5Hr1G032550.3	H.vulgare r1	6.25e-74	34	453	+/+	seq.submitted 2021-10-26T22:05:40.605Z UTC	64	512	64	485	245.743	156	237	35	523	521
	phytozome-next.jgi.doe.gov/report/protein/Hvulgare_r1/HORVU3Hr1G055730.2	HORVU3Hr1G055730.2	H.vulgare r1	6.57e-74	34	419	+/+	seq.submitted 2021-10-26T22:05:40.605Z UTC	97	511	170	561	246.899	143	229	31	523	573
	phytozome-next.jgi.doe.gov/report/protein/Hvulgare_r1/HORVU5Hr1G032550.4	HORVU5Hr1G032550.4	H.vulgare r1	9.42e-74	36	420	+/+	seq.submitted 2021-10-26T22:05:40.605Z UTC	97	512	76	467	244.588	150	225	32	523	503
	phytozome-next.jgi.doe.gov/report/protein/Hvulgare_r1/HORVU5Hr1G044550.1	HORVU5Hr1G044550.1	H.vulgare r1	1.89e-73	33	419	+/+	seq.submitted 2021-10-26T22:05:40.605Z UTC	98	512	135	526	244.973	140	228	31	523	543
	phytozome-next.jgi.doe.gov/report/protein/Hvulgare_r1/HORVU3Hr1G079040.2	HORVU3Hr1G079040.2	H.vulgare r1	2.28e-72	35	420	+/+	seq.submitted 2021-10-26T22:05:40.605Z UTC	97	511	115	507	241.506	145	222	32	523	522
	phytozome-next.jgi.doe.gov/report/protein/Hvulgare_r1/HORVU0Hr1G023280.32	HORVU0Hr1G023280.32	H.vulgare r1	5.11e-72	83	128	+/+	seq.submitted 2021-10-26T22:05:40.605Z UTC	396	523	1	128	227.639	106	117	0	523	132
	phytozome-next.jgi.doe.gov/report/protein/Hvulgare_r1/HORVU1Hr1G092710.2	HORVU1Hr1G092710.2	H.vulgare r1	7.15e-71	38	366	+/+	seq.submitted 2021-10-26T22:05:40.605Z UTC	97	454	78	419	234.572	138	204	32	523	420
	phytozome-next.jgi.doe.gov/report/protein/Hvulgare_r1/HORVU4Hr1G026640.1	HORVU4Hr1G026640.1	H.vulgare r1	9.04e-71	33	420	+/+	seq.submitted 2021-10-26T22:05:40.605Z UTC	97	512	133	525	237.654	140	226	31	523	542
	phytozome-next.jgi.doe.gov/report/protein/Hvulgare_r1/HORVU5Hr1G030810.1	HORVU5Hr1G030810.1	H.vulgare r1	1.2e-70	36	425	+/+	seq.submitted 2021-10-26T22:05:40.605Z UTC	97	512	273	664	241.121	151	232	42	523	690
	phytozome-next.jgi.doe.gov/report/protein/Hvulgare_r1/HORVU2Hr1G046660.5	HORVU2Hr1G046660.5	H.vulgare r1	2.4e-70	33	415	+/+	seq.submitted 2021-10-26T22:05:40.605Z UTC	97	508	135	522	236.498	138	225	30	523	533
	phytozome-next.jgi.doe.gov/report/protein/Hvulgare_r1/HORVU2Hr1G046660.8	HORVU2Hr1G046660.8	H.vulgare r1	2.4e-70	33	415	+/+	seq.submitted 2021-10-26T22:05:40.605Z UTC	97	508	135	522	236.498	138	225	30	523	533
	phytozome-next.jgi.doe.gov/report/protein/Hvulgare_r1/HORVU2Hr1G046660.7	HORVU2Hr1G046660.7	H.vulgare r1	2.4e-70	33	415	+/+	seq.submitted 2021-10-26T22:05:40.605Z UTC	97	508	135	522	236.498	138	225	30	523	533
	phytozome-next.jgi.doe.gov/report/protein/Hvulgare_r1/HORVU2Hr1G046660.9	HORVU2Hr1G046660.9	H.vulgare r1	2.4e-70	33	415	+/+	seq.submitted 2021-10-26T22:05:40.605Z UTC	97	508	135	522	236.498	138	225	30	523	533
	phytozome-next.jgi.doe.gov/report/protein/Hvulgare_r1/HORVU2Hr1G046660.6	HORVU2Hr1G046660.6	H.vulgare r1	2.4e-70	33	415	+/+	seq.submitted 2021-10-26T22:05:40.605Z UTC	97	508	135	522	236.498	138	225	30	523	533
	phytozome-next.jgi.doe.gov/report/protein/Hvulgare_r1/HORVU2Hr1G046660.13	HORVU2Hr1G046660.13	H.vulgare r1	2.4e-70	33	415	+/+	seq.submitted 2021-10-26T22:05:40.605Z UTC	97	508	135	522	236.498	138	225	30	523	533
	phytozome-next.jgi.doe.gov/report/protein/Hvulgare_r1/HORVU2Hr1G046660.3	HORVU2Hr1G046660.3	H.vulgare r1	2.4e-70	33	415	+/+	seq.submitted 2021-10-26T22:05:40.605Z UTC	97	508	135	522	236.498	138	225	30	523	533
	phytozome-next.jgi.doe.gov/report/protein/Hvulgare_r1/HORVU2Hr1G046660.10	HORVU2Hr1G046660.10	H.vulgare r1	2.4e-70	33	415	+/+	seq.submitted 2021-10-26T22:05:40.605Z UTC	97	508	135	522	236.498	138	225	30	523	533
	phytozome-next.jgi.doe.gov/report/protein/Hvulgare_r1/HORVU0Hr1G023280.30	HORVU0Hr1G023280.30	H.vulgare r1	3.01e-70	71	150	+/+	seq.submitted 2021-10-26T22:05:40.605Z UTC	299	448	5	154	224.172	106	129	0	523	167
	phytozome-next.jgi.doe.gov/report/protein/Hvulgare_r1/HORVU0Hr1G023280.26	HORVU0Hr1G023280.26	H.vulgare r1	3.01e-70	71	150	+/+	seq.submitted 2021-10-26T22:05:40.605Z UTC	299	448	5	154	224.172	106	129	0	523	167
	phytozome-next.jgi.doe.gov/report/protein/Hvulgare_r1/HORVU0Hr1G023280.25	HORVU0Hr1G023280.25	H.vulgare r1	3.68e-70	70	149	+/+	seq.submitted 2021-10-26T22:05:40.605Z UTC	299	447	5	153	224.557	105	128	0	523	177
	phytozome-next.jgi.doe.gov/report/protein/Hvulgare_r1/HORVU3Hr1G079040.3	HORVU3Hr1G079040.3	H.vulgare r1	8.94e-70	35	409	+/+	seq.submitted 2021-10-26T22:05:40.605Z UTC	97	500	76	457	233.032	143	215	32	523	461
	phytozome-next.jgi.doe.gov/report/protein/Hvulgare_r1/HORVU5Hr1G103830.5	HORVU5Hr1G103830.5	H.vulgare r1	1.79e-69	36	435	+/+	seq.submitted 2021-10-26T22:05:40.605Z UTC	87	509	130	532	234.958	156	231	44	523	558
	phytozome-next.jgi.doe.gov/report/protein/Hvulgare_r1/HORVU3Hr1G079040.4	HORVU3Hr1G079040.4	H.vulgare r1	8.08e-69	35	403	+/+	seq.submitted 2021-10-26T22:05:40.605Z UTC	97	494	65	440	233.032	142	213	32	523	560
	phytozome-next.jgi.doe.gov/report/protein/Hvulgare_r1/HORVU5Hr1G044550.2	HORVU5Hr1G044550.2	H.vulgare r1	9.04e-69	35	373	+/+	seq.submitted 2021-10-26T22:05:40.605Z UTC	98	466	118	470	231.491	131	206	24	523	496
	phytozome-next.jgi.doe.gov/report/protein/Hvulgare_r1/HORVU0Hr1G032220.1	HORVU0Hr1G032220.1	H.vulgare r1	1.8e-68	35	411	+/+	seq.submitted 2021-10-26T22:05:40.605Z UTC	97	498	147	525	231.491	142	217	41	523	526
	phytozome-next.jgi.doe.gov/report/protein/Hvulgare_r1/HORVU1Hr1G068240.1	HORVU1Hr1G068240.1	H.vulgare r1	2.07e-68	35	411	+/+	seq.submitted 2021-10-26T22:05:40.605Z UTC	97	498	147	525	231.106	142	217	41	523	526
	phytozome-next.jgi.doe.gov/report/protein/Hvulgare_r1/HORVU3Hr1G055730.3	HORVU3Hr1G055730.3	H.vulgare r1	2.66e-68	32	445	+/+	seq.submitted 2021-10-26T22:05:40.605Z UTC	97	511	166	583	232.646	143	230	57	523	595
	phytozome-next.jgi.doe.gov/report/protein/Hvulgare_r1/HORVU5Hr1G103830.4	HORVU5Hr1G103830.4	H.vulgare r1	2.82e-68	36	435	+/+	seq.submitted 2021-10-26T22:05:40.605Z UTC	87	509	156	558	232.261	155	230	44	523	584
	phytozome-next.jgi.doe.gov/report/protein/Hvulgare_r1/HORVU2Hr1G096270.1	HORVU2Hr1G096270.1	H.vulgare r1	1.3e-67	35	426	+/+	seq.submitted 2021-10-26T22:05:40.605Z UTC	95	509	53	446	226.868	147	219	43	523	449
	phytozome-next.jgi.doe.gov/report/protein/Hvulgare_r1/HORVU2Hr1G096270.3	HORVU2Hr1G096270.3	H.vulgare r1	1.3e-67	35	426	+/+	seq.submitted 2021-10-26T22:05:40.605Z UTC	95	509	53	446	226.868	147	219	43	523	449
	phytozome-next.jgi.doe.gov/report/protein/Hvulgare_r1/HORVU2Hr1G096270.7	HORVU2Hr1G096270.7	H.vulgare r1	1.35e-67	34	425	+/+	seq.submitted 2021-10-26T22:05:40.605Z UTC	95	509	59	452	226.868	145	215	41	523	455
	phytozome-next.jgi.doe.gov/report/protein/Hvulgare_r1/HORVU0Hr1G032220.2	HORVU0Hr1G032220.2	H.vulgare r1	1.67e-67	36	374	+/+	seq.submitted 2021-10-26T22:05:40.605Z UTC	97	466	125	478	228.409	134	202	24	523	517
	phytozome-next.jgi.doe.gov/report/protein/Hvulgare_r1/HORVU5Hr1G110900.3	HORVU5Hr1G110900.3	H.vulgare r1	1.73e-67	33	418	+/+	seq.submitted 2021-10-26T22:05:40.605Z UTC	98	508	111	500	229.18	138	219	35	523	536
	phytozome-next.jgi.doe.gov/report/protein/Hvulgare_r1/HORVU5Hr1G110900.3	HORVU5Hr1G110900.3	H.vulgare r1	0.0757	43	44	+/+	seq.submitted 2021-10-26T22:05:40.605Z UTC	477	514	360	403	38.5058	19	28	6	523	536
	phytozome-next.jgi.doe.gov/report/protein/Hvulgare_r1/HORVU1Hr1G068240.2	HORVU1Hr1G068240.2	H.vulgare r1	2.05e-67	36	374	+/+	seq.submitted 2021-10-26T22:05:40.605Z UTC	97	466	125	478	228.409	134	202	24	523	517
	phytozome-next.jgi.doe.gov/report/protein/Hvulgare_r1/HORVU2Hr1G058530.1	HORVU2Hr1G058530.1	H.vulgare r1	3.36e-67	37	369	+/+	seq.submitted 2021-10-26T22:05:40.605Z UTC	97	461	153	501	228.409	138	203	24	523	540
	phytozome-next.jgi.doe.gov/report/protein/Hvulgare_r1/HORVU2Hr1G058530.2	HORVU2Hr1G058530.2	H.vulgare r1	4.17e-67	36	417	+/+	seq.submitted 2021-10-26T22:05:40.605Z UTC	97	509	153	541	228.794	152	225	32	523	566
	phytozome-next.jgi.doe.gov/report/protein/Hvulgare_r1/HORVU2Hr1G096270.5	HORVU2Hr1G096270.5	H.vulgare r1	6.74e-67	34	425	+/+	seq.submitted 2021-10-26T22:05:40.605Z UTC	95	509	118	511	226.868	145	215	41	523	514
	phytozome-next.jgi.doe.gov/report/protein/Hvulgare_r1/HORVU5Hr1G030810.3	HORVU5Hr1G030810.3	H.vulgare r1	2.12e-66	34	450	+/+	seq.submitted 2021-10-26T22:05:40.605Z UTC	97	512	177	593	228.024	153	234	67	523	619
	phytozome-next.jgi.doe.gov/report/protein/Hvulgare_r1/HORVU5Hr1G103830.2	HORVU5Hr1G103830.2	H.vulgare r1	2.14e-66	35	413	+/+	seq.submitted 2021-10-26T22:05:40.605Z UTC	108	512	265	645	229.18	146	219	40	523	668
	phytozome-next.jgi.doe.gov/report/protein/Hvulgare_r1/HORVU5Hr1G103830.1	HORVU5Hr1G103830.1	H.vulgare r1	2.23e-66	35	413	+/+	seq.submitted 2021-10-26T22:05:40.605Z UTC	108	512	278	658	229.565	146	219	40	523	681
	phytozome-next.jgi.doe.gov/report/protein/Hvulgare_r1/HORVU5Hr1G078430.2	HORVU5Hr1G078430.2	H.vulgare r1	3.98e-66	31	517	+/+	seq.submitted 2021-10-26T22:05:40.605Z UTC	2	516	75	536	225.713	158	250	57	523	555
	phytozome-next.jgi.doe.gov/report/protein/Hvulgare_r1/HORVU5Hr1G044550.3	HORVU5Hr1G044550.3	H.vulgare r1	8.6e-66	35	361	+/+	seq.submitted 2021-10-26T22:05:40.605Z UTC	98	454	125	465	222.631	126	198	24	523	466
	phytozome-next.jgi.doe.gov/report/protein/Hvulgare_r1/HORVU4Hr1G026640.4	HORVU4Hr1G026640.4	H.vulgare r1	9.05e-66	33	403	+/+	seq.submitted 2021-10-26T22:05:40.605Z UTC	97	495	139	514	224.172	135	215	31	523	520
	phytozome-next.jgi.doe.gov/report/protein/Hvulgare_r1/HORVU4Hr1G026640.5	HORVU4Hr1G026640.5	H.vulgare r1	2.23e-65	35	374	+/+	seq.submitted 2021-10-26T22:05:40.605Z UTC	97	466	148	501	223.787	130	205	24	523	544
	phytozome-next.jgi.doe.gov/report/protein/Hvulgare_r1/HORVU2Hr1G046660.1	HORVU2Hr1G046660.1	H.vulgare r1	8.1e-65	35	372	+/+	seq.submitted 2021-10-26T22:05:40.605Z UTC	97	465	135	486	222.246	129	203	23	523	542
	phytozome-next.jgi.doe.gov/report/protein/Hvulgare_r1/HORVU2Hr1G039070.1	HORVU2Hr1G039070.1	H.vulgare r1	2.21e-64	32	499	+/+	seq.submitted 2021-10-26T22:05:40.605Z UTC	42	508	83	549	221.861	158	250	64	523	586
	phytozome-next.jgi.doe.gov/report/protein/Hvulgare_r1/HORVU6Hr1G066470.1	HORVU6Hr1G066470.1	H.vulgare r1	6.26e-64	34	421	+/+	seq.submitted 2021-10-26T22:05:40.605Z UTC	97	509	139	527	219.935	143	218	40	523	548
	phytozome-next.jgi.doe.gov/report/protein/Hvulgare_r1/HORVU6Hr1G066470.4	HORVU6Hr1G066470.4	H.vulgare r1	6.26e-64	34	421	+/+	seq.submitted 2021-10-26T22:05:40.605Z UTC	97	509	139	527	219.935	143	218	40	523	548
	phytozome-next.jgi.doe.gov/report/protein/Hvulgare_r1/HORVU2Hr1G096270.2	HORVU2Hr1G096270.2	H.vulgare r1	8.22e-64	35	372	+/+	seq.submitted 2021-10-26T22:05:40.605Z UTC	95	461	53	405	216.853	132	194	24	523	441
	phytozome-next.jgi.doe.gov/report/protein/Hvulgare_r1/HORVU4Hr1G082790.1	HORVU4Hr1G082790.1	H.vulgare r1	1.65e-63	35	431	+/+	seq.submitted 2021-10-26T22:05:40.605Z UTC	97	523	131	531	218.779	151	221	34	523	549
	phytozome-next.jgi.doe.gov/report/protein/Hvulgare_r1/HORVU4Hr1G082790.6	HORVU4Hr1G082790.6	H.vulgare r1	1.65e-63	35	431	+/+	seq.submitted 2021-10-26T22:05:40.605Z UTC	97	523	131	531	218.779	151	221	34	523	549
	phytozome-next.jgi.doe.gov/report/protein/Hvulgare_r1/HORVU3Hr1G087600.1	HORVU3Hr1G087600.1	H.vulgare r1	2.58e-63	33	432	+/+	seq.submitted 2021-10-26T22:05:40.605Z UTC	81	508	98	497	218.009	142	223	36	523	533
	phytozome-next.jgi.doe.gov/report/protein/Hvulgare_r1/HORVU5Hr1G110900.5	HORVU5Hr1G110900.5	H.vulgare r1	3.23e-63	33	370	+/+	seq.submitted 2021-10-26T22:05:40.605Z UTC	98	465	111	462	216.468	123	197	20	523	490
	phytozome-next.jgi.doe.gov/report/protein/Hvulgare_r1/HORVU5Hr1G110900.5	HORVU5Hr1G110900.5	H.vulgare r1	0.0679	43	44	+/+	seq.submitted 2021-10-26T22:05:40.605Z UTC	477	514	360	403	38.5058	19	28	6	523	490
	phytozome-next.jgi.doe.gov/report/protein/Hvulgare_r1/HORVU5Hr1G032550.2	HORVU5Hr1G032550.2	H.vulgare r1	5.49e-62	41	288	+/+	seq.submitted 2021-10-26T22:05:40.605Z UTC	64	350	64	346	209.92	117	166	6	523	379
	phytozome-next.jgi.doe.gov/report/protein/Hvulgare_r1/HORVU6Hr1G094990.1	HORVU6Hr1G094990.1	H.vulgare r1	6.22e-62	33	438	+/+	seq.submitted 2021-10-26T22:05:40.605Z UTC	97	509	132	539	214.927	145	219	55	523	568
	phytozome-next.jgi.doe.gov/report/protein/Hvulgare_r1/HORVU2Hr1G096270.6	HORVU2Hr1G096270.6	H.vulgare r1	4.7e-61	35	365	+/+	seq.submitted 2021-10-26T22:05:40.605Z UTC	95	454	136	481	210.69	129	188	24	523	490
	phytozome-next.jgi.doe.gov/report/protein/Hvulgare_r1/HORVU4Hr1G004540.10	HORVU4Hr1G004540.10	H.vulgare r1	5.57e-61	31	513	+/+	seq.submitted 2021-10-26T22:05:40.605Z UTC	7	508	26	471	211.075	160	246	78	523	505
	phytozome-next.jgi.doe.gov/report/protein/Hvulgare_r1/HORVU4Hr1G004540.18	HORVU4Hr1G004540.18	H.vulgare r1	5.81e-61	31	513	+/+	seq.submitted 2021-10-26T22:05:40.605Z UTC	7	508	26	471	211.075	159	246	78	523	506
	phytozome-next.jgi.doe.gov/report/protein/Hvulgare_r1/HORVU4Hr1G004540.17	HORVU4Hr1G004540.17	H.vulgare r1	6.01e-61	31	513	+/+	seq.submitted 2021-10-26T22:05:40.605Z UTC	7	508	27	472	211.075	160	246	78	523	508
	phytozome-next.jgi.doe.gov/report/protein/Hvulgare_r1/HORVU2Hr1G039070.8	HORVU2Hr1G039070.8	H.vulgare r1	6.45e-61	32	456	+/+	seq.submitted 2021-10-26T22:05:40.605Z UTC	42	465	29	458	210.305	146	229	58	523	486
	phytozome-next.jgi.doe.gov/report/protein/Hvulgare_r1/HORVU4Hr1G004540.9	HORVU4Hr1G004540.9	H.vulgare r1	1.59e-60	31	513	+/+	seq.submitted 2021-10-26T22:05:40.605Z UTC	7	508	66	511	210.69	159	246	78	523	547
	phytozome-next.jgi.doe.gov/report/protein/Hvulgare_r1/HORVU4Hr1G004540.8	HORVU4Hr1G004540.8	H.vulgare r1	2.12e-60	31	513	+/+	seq.submitted 2021-10-26T22:05:40.605Z UTC	7	508	86	531	210.69	159	246	78	523	566
	phytozome-next.jgi.doe.gov/report/protein/Hvulgare_r1/HORVU5Hr1G078430.4	HORVU5Hr1G078430.4	H.vulgare r1	2.39e-60	35	357	+/+	seq.submitted 2021-10-26T22:05:40.605Z UTC	111	465	1	339	205.297	125	186	20	523	367
	phytozome-next.jgi.doe.gov/report/protein/Hvulgare_r1/HORVU6Hr1G094990.2	HORVU6Hr1G094990.2	H.vulgare r1	3.07e-60	33	439	+/+	seq.submitted 2021-10-26T22:05:40.605Z UTC	97	509	132	540	210.305	145	219	56	523	569
	phytozome-next.jgi.doe.gov/report/protein/Hvulgare_r1/HORVU3Hr1G079040.6	HORVU3Hr1G079040.6	H.vulgare r1	3.27e-60	37	302	+/+	seq.submitted 2021-10-26T22:05:40.605Z UTC	97	397	47	328	204.912	113	171	21	523	363
	phytozome-next.jgi.doe.gov/report/protein/Hvulgare_r1/HORVU6Hr1G066470.9	HORVU6Hr1G066470.9	H.vulgare r1	6.62e-60	35	373	+/+	seq.submitted 2021-10-26T22:05:40.605Z UTC	97	461	109	457	208.379	131	197	32	523	519
	phytozome-next.jgi.doe.gov/report/protein/Hvulgare_r1/HORVU5Hr1G030810.6	HORVU5Hr1G030810.6	H.vulgare r1	7.04e-60	40	305	+/+	seq.submitted 2021-10-26T22:05:40.605Z UTC	97	395	124	402	205.682	121	180	32	523	423
	phytozome-next.jgi.doe.gov/report/protein/Hvulgare_r1/HORVU2Hr1G046660.12	HORVU2Hr1G046660.12	H.vulgare r1	8.42e-60	36	320	+/+	seq.submitted 2021-10-26T22:05:40.605Z UTC	97	416	135	434	206.068	115	174	20	523	438
	phytozome-next.jgi.doe.gov/report/protein/Hvulgare_r1/HORVU2Hr1G046660.2	HORVU2Hr1G046660.2	H.vulgare r1	8.42e-60	36	320	+/+	seq.submitted 2021-10-26T22:05:40.605Z UTC	97	416	135	434	206.068	115	174	20	523	438
	Paralogs	Protein/Splice variants	Species	E-value	% identity	Align len	Strands	Query ID	Query from	Query to	Target from	Target to	Bitscore
	1	HORVU0Hr1G023280.12	H.vulgare r1	8.59e-111	68	244	+/+	seq.submitted 2021-10-26T22:05:40.605Z UTC	5	245	6	239	331.257
		HORVU0Hr1G023280.13	H.vulgare r1	5.47e-139	74	261	+/+	seq.submitted 2021-10-26T22:05:40.605Z UTC	263	523	15	275	404.445
		HORVU0Hr1G023280.14	H.vulgare r1	0	70	522	+/+	seq.submitted 2021-10-26T22:05:40.605Z UTC	5	523	6	517	751.51
		HORVU0Hr1G023280.15	H.vulgare r1	0	68	466	+/+	seq.submitted 2021-10-26T22:05:40.605Z UTC	5	467	6	461	654.825
		HORVU0Hr1G023280.16	H.vulgare r1	8.59e-111	68	244	+/+	seq.submitted 2021-10-26T22:05:40.605Z UTC	5	245	6	239	331.257
		HORVU0Hr1G023280.17	H.vulgare r1	1.67e-133	66	298	+/+	seq.submitted 2021-10-26T22:05:40.605Z UTC	5	297	6	293	391.734
		HORVU0Hr1G023280.18	H.vulgare r1	8.59e-111	68	244	+/+	seq.submitted 2021-10-26T22:05:40.605Z UTC	5	245	6	239	331.257
		HORVU0Hr1G023280.19	H.vulgare r1	8.59e-111	68	244	+/+	seq.submitted 2021-10-26T22:05:40.605Z UTC	5	245	6	239	331.257
		HORVU0Hr1G023280.20	H.vulgare r1	0	69	523	+/+	seq.submitted 2021-10-26T22:05:40.605Z UTC	5	523	6	518	739.569
		HORVU0Hr1G023280.21	H.vulgare r1	8.59e-111	68	244	+/+	seq.submitted 2021-10-26T22:05:40.605Z UTC	5	245	6	239	331.257
		HORVU0Hr1G023280.22	H.vulgare r1	2.69e-135	66	296	+/+	seq.submitted 2021-10-26T22:05:40.605Z UTC	5	297	6	291	396.356
		HORVU0Hr1G023280.23	H.vulgare r1	0	70	522	+/+	seq.submitted 2021-10-26T22:05:40.605Z UTC	5	523	6	517	751.125
		HORVU0Hr1G023280.24	H.vulgare r1	1.04e-120	76	220	+/+	seq.submitted 2021-10-26T22:05:40.605Z UTC	304	523	3	222	355.91
		HORVU0Hr1G023280.27	H.vulgare r1	1.04e-120	76	220	+/+	seq.submitted 2021-10-26T22:05:40.605Z UTC	304	523	3	222	355.91
		HORVU0Hr1G023280.29	H.vulgare r1	3.43e-117	75	220	+/+	seq.submitted 2021-10-26T22:05:40.605Z UTC	304	523	3	222	347.051
		HORVU0Hr1G023280.31	H.vulgare r1	6.95e-122	75	225	+/+	seq.submitted 2021-10-26T22:05:40.605Z UTC	299	523	5	229	359.377
	2	HORVU1Hr1G068660.1	H.vulgare r1	1.51e-135	66	296	+/+	seq.submitted 2021-10-26T22:05:40.605Z UTC	5	297	6	291	397.127
		HORVU1Hr1G068660.2	H.vulgare r1	0	70	522	+/+	seq.submitted 2021-10-26T22:05:40.605Z UTC	5	523	6	517	750.74
		HORVU1Hr1G068660.3	H.vulgare r1	5e-120	75	220	+/+	seq.submitted 2021-10-26T22:05:40.605Z UTC	304	523	3	222	354.369

## Sheet: Sorghum
	Views	Protein	Species	E-value	% identity	Align len	Strands	Query ID	Query from	Query to	Target from	Target to	Bitscore	# identical	Positives	Gaps	Query len	Target len
	phytozome-next.jgi.doe.gov/report/protein/Sbicolor_v3_1_1/Sobic.010G260600.1.p	Sobic.010G260600.1.p	S.bicolor v3.1.1	0	70	519	+/+	seq.submitted 2021-10-26T22:07:08.867Z UTC	5	523	6	511	750.355	362	431	13	523	517
	phytozome-next.jgi.doe.gov/report/protein/Sbicolor_v3_1_1/Sobic.009G249000.1.p	Sobic.009G249000.1.p	S.bicolor v3.1.1	8.48e-78	36	424	+/+	seq.submitted 2021-10-26T22:07:08.867Z UTC	97	512	139	531	254.603	152	234	39	523	542
	phytozome-next.jgi.doe.gov/report/protein/Sbicolor_v3_1_1/Sobic.003G329600.1.p	Sobic.003G329600.1.p	S.bicolor v3.1.1	6.52e-77	35	437	+/+	seq.submitted 2021-10-26T22:07:08.867Z UTC	97	518	116	520	251.521	153	235	47	523	521
	phytozome-next.jgi.doe.gov/report/protein/Sbicolor_v3_1_1/Sobic.001G063600.1.p	Sobic.001G063600.1.p	S.bicolor v3.1.1	3.19e-76	37	423	+/+	seq.submitted 2021-10-26T22:07:08.867Z UTC	97	511	203	593	252.292	158	235	40	523	618
	phytozome-next.jgi.doe.gov/report/protein/Sbicolor_v3_1_1/Sobic.003G225200.1.p	Sobic.003G225200.1.p	S.bicolor v3.1.1	4.25e-75	34	419	+/+	seq.submitted 2021-10-26T22:07:08.867Z UTC	97	511	123	514	246.899	144	229	31	523	526
	phytozome-next.jgi.doe.gov/report/protein/Sbicolor_v3_1_1/Sobic.008G053300.1.p	Sobic.008G053300.1.p	S.bicolor v3.1.1	5.63e-75	36	420	+/+	seq.submitted 2021-10-26T22:07:08.867Z UTC	97	512	99	490	246.514	150	227	32	523	516
	phytozome-next.jgi.doe.gov/report/protein/Sbicolor_v3_1_1/Sobic.005G056600.1.p	Sobic.005G056600.1.p	S.bicolor v3.1.1	1.06e-74	36	420	+/+	seq.submitted 2021-10-26T22:07:08.867Z UTC	97	512	99	490	245.743	152	225	32	523	516
	phytozome-next.jgi.doe.gov/report/protein/Sbicolor_v3_1_1/Sobic.005G056600.2.p	Sobic.005G056600.2.p	S.bicolor v3.1.1	1.06e-74	36	420	+/+	seq.submitted 2021-10-26T22:07:08.867Z UTC	97	512	99	490	245.743	152	225	32	523	516
	phytozome-next.jgi.doe.gov/report/protein/Sbicolor_v3_1_1/Sobic.002G040800.1.p	Sobic.002G040800.1.p	S.bicolor v3.1.1	2.9e-74	36	417	+/+	seq.submitted 2021-10-26T22:07:08.867Z UTC	97	509	169	557	246.514	149	224	32	523	582
	phytozome-next.jgi.doe.gov/report/protein/Sbicolor_v3_1_1/Sobic.005G025400.1.p	Sobic.005G025400.1.p	S.bicolor v3.1.1	4.54e-74	34	423	+/+	seq.submitted 2021-10-26T22:07:08.867Z UTC	97	515	132	527	244.588	143	228	31	523	539
	phytozome-next.jgi.doe.gov/report/protein/Sbicolor_v3_1_1/Sobic.008G097800.1.p	Sobic.008G097800.1.p	S.bicolor v3.1.1	1.78e-73	35	424	+/+	seq.submitted 2021-10-26T22:07:08.867Z UTC	97	512	202	593	244.973	150	233	40	523	617
	phytozome-next.jgi.doe.gov/report/protein/Sbicolor_v3_1_1/Sobic.009G180600.1.p	Sobic.009G180600.1.p	S.bicolor v3.1.1	7.54e-73	35	422	+/+	seq.submitted 2021-10-26T22:07:08.867Z UTC	97	509	122	511	241.121	146	224	41	523	528
	phytozome-next.jgi.doe.gov/report/protein/Sbicolor_v3_1_1/Sobic.008G015600.1.p	Sobic.008G015600.1.p	S.bicolor v3.1.1	3.36e-71	33	420	+/+	seq.submitted 2021-10-26T22:07:08.867Z UTC	97	512	167	559	238.039	138	228	31	523	575
	phytozome-next.jgi.doe.gov/report/protein/Sbicolor_v3_1_1/Sobic.001G063300.1.p	Sobic.001G063300.1.p	S.bicolor v3.1.1	3.58e-71	36	421	+/+	seq.submitted 2021-10-26T22:07:08.867Z UTC	97	509	172	560	238.424	152	225	40	523	586
	phytozome-next.jgi.doe.gov/report/protein/Sbicolor_v3_1_1/Sobic.006G177500.1.p	Sobic.006G177500.1.p	S.bicolor v3.1.1	1.1e-70	33	421	+/+	seq.submitted 2021-10-26T22:07:08.867Z UTC	95	511	137	531	235.728	140	219	30	523	534
	phytozome-next.jgi.doe.gov/report/protein/Sbicolor_v3_1_1/Sobic.002G317300.1.p	Sobic.002G317300.1.p	S.bicolor v3.1.1	8.25e-70	34	418	+/+	seq.submitted 2021-10-26T22:07:08.867Z UTC	97	508	133	521	233.417	141	228	35	523	532
	phytozome-next.jgi.doe.gov/report/protein/Sbicolor_v3_1_1/Sobic.001G520900.1.p	Sobic.001G520900.1.p	S.bicolor v3.1.1	1.57e-69	37	416	+/+	seq.submitted 2021-10-26T22:07:08.867Z UTC	97	510	129	518	233.032	152	218	28	523	545
	phytozome-next.jgi.doe.gov/report/protein/Sbicolor_v3_1_1/Sobic.001G132800.1.p	Sobic.001G132800.1.p	S.bicolor v3.1.1	6.35e-68	32	510	+/+	seq.submitted 2021-10-26T22:07:08.867Z UTC	7	508	108	552	229.565	164	253	73	523	587
	phytozome-next.jgi.doe.gov/report/protein/Sbicolor_v3_1_1/Sobic.001G045000.1.p	Sobic.001G045000.1.p	S.bicolor v3.1.1	8.91e-67	33	413	+/+	seq.submitted 2021-10-26T22:07:08.867Z UTC	98	508	109	497	225.328	136	219	26	523	533
	phytozome-next.jgi.doe.gov/report/protein/Sbicolor_v3_1_1/Sobic.001G045000.1.p	Sobic.001G045000.1.p	S.bicolor v3.1.1	0.016	41	44	+/+	seq.submitted 2021-10-26T22:07:08.867Z UTC	477	514	358	401	38.5058	18	28	6	523	533
	phytozome-next.jgi.doe.gov/report/protein/Sbicolor_v3_1_1/Sobic.003G345000.1.p	Sobic.003G345000.1.p	S.bicolor v3.1.1	1.86e-66	34	432	+/+	seq.submitted 2021-10-26T22:07:08.867Z UTC	81	508	111	510	224.557	145	226	36	523	546
	phytozome-next.jgi.doe.gov/report/protein/Sbicolor_v3_1_1/Sobic.009G167900.1.p	Sobic.009G167900.1.p	S.bicolor v3.1.1	2.25e-65	33	438	+/+	seq.submitted 2021-10-26T22:07:08.867Z UTC	81	508	109	508	221.861	143	223	48	523	544
	phytozome-next.jgi.doe.gov/report/protein/Sbicolor_v3_1_1/Sobic.004G279100.2.p	Sobic.004G279100.2.p	S.bicolor v3.1.1	4.6e-65	34	421	+/+	seq.submitted 2021-10-26T22:07:08.867Z UTC	97	509	152	540	221.476	144	219	40	523	566
	phytozome-next.jgi.doe.gov/report/protein/Sbicolor_v3_1_1/Sobic.004G279100.1.p	Sobic.004G279100.1.p	S.bicolor v3.1.1	4.6e-65	34	421	+/+	seq.submitted 2021-10-26T22:07:08.867Z UTC	97	509	152	540	221.476	144	219	40	523	566
	phytozome-next.jgi.doe.gov/report/protein/Sbicolor_v3_1_1/Sobic.006G192500.1.p	Sobic.006G192500.1.p	S.bicolor v3.1.1	4.38e-64	34	421	+/+	seq.submitted 2021-10-26T22:07:08.867Z UTC	97	509	142	530	218.779	143	218	40	523	556
	phytozome-next.jgi.doe.gov/report/protein/Sbicolor_v3_1_1/Sobic.002G343500.1.p	Sobic.002G343500.1.p	S.bicolor v3.1.1	7.42e-64	33	416	+/+	seq.submitted 2021-10-26T22:07:08.867Z UTC	98	508	119	507	217.624	138	216	32	523	544
	phytozome-next.jgi.doe.gov/report/protein/Sbicolor_v3_1_1/Sobic.008G080700.1.p	Sobic.008G080700.1.p	S.bicolor v3.1.1	4.8e-63	30	499	+/+	seq.submitted 2021-10-26T22:07:08.867Z UTC	12	508	83	519	216.083	150	248	64	523	570
	phytozome-next.jgi.doe.gov/report/protein/Sbicolor_v3_1_1/Sobic.003G400700.1.p	Sobic.003G400700.1.p	S.bicolor v3.1.1	1.23e-62	32	428	+/+	seq.submitted 2021-10-26T22:07:08.867Z UTC	91	516	135	536	214.927	138	222	28	523	558
	phytozome-next.jgi.doe.gov/report/protein/Sbicolor_v3_1_1/Sobic.004G358000.2.p	Sobic.004G358000.2.p	S.bicolor v3.1.1	6.61e-61	33	436	+/+	seq.submitted 2021-10-26T22:07:08.867Z UTC	97	509	78	481	208.764	144	223	55	523	505
	phytozome-next.jgi.doe.gov/report/protein/Sbicolor_v3_1_1/Sobic.001G313100.1.p	Sobic.001G313100.1.p	S.bicolor v3.1.1	1.45e-60	35	424	+/+	seq.submitted 2021-10-26T22:07:08.867Z UTC	97	512	126	516	208.764	147	214	41	523	539
	phytozome-next.jgi.doe.gov/report/protein/Sbicolor_v3_1_1/Sobic.002G114800.1.p	Sobic.002G114800.1.p	S.bicolor v3.1.1	1.08e-59	32	423	+/+	seq.submitted 2021-10-26T22:07:08.867Z UTC	97	508	104	496	206.068	134	209	41	523	515
	phytozome-next.jgi.doe.gov/report/protein/Sbicolor_v3_1_1/Sobic.002G317300.2.p	Sobic.002G317300.2.p	S.bicolor v3.1.1	1.03e-58	38	299	+/+	seq.submitted 2021-10-26T22:07:08.867Z UTC	97	392	133	409	201.445	113	170	25	523	437
	phytozome-next.jgi.doe.gov/report/protein/Sbicolor_v3_1_1/Sobic.004G025000.1.p	Sobic.004G025000.1.p	S.bicolor v3.1.1	9.03e-58	29	527	+/+	seq.submitted 2021-10-26T22:07:08.867Z UTC	1	516	52	513	201.06	155	249	76	523	526
	phytozome-next.jgi.doe.gov/report/protein/Sbicolor_v3_1_1/Sobic.004G025000.2.p	Sobic.004G025000.2.p	S.bicolor v3.1.1	7.11e-57	29	527	+/+	seq.submitted 2021-10-26T22:07:08.867Z UTC	1	516	52	511	198.749	154	247	78	523	524
	phytozome-next.jgi.doe.gov/report/protein/Sbicolor_v3_1_1/Sobic.004G025000.3.p	Sobic.004G025000.3.p	S.bicolor v3.1.1	1.34e-54	30	472	+/+	seq.submitted 2021-10-26T22:07:08.867Z UTC	1	461	52	469	191.43	142	223	65	523	472
	phytozome-next.jgi.doe.gov/report/protein/Sbicolor_v3_1_1/Sobic.004G025000.3.p	Sobic.004G025000.3.p	S.bicolor v3.1.1	0.0113	47	62	+/+	seq.submitted 2021-10-26T22:07:08.867Z UTC	445	506	374	430	38.891	29	33	5	523	472
	phytozome-next.jgi.doe.gov/report/protein/Sbicolor_v3_1_1/Sobic.001G361300.1.p	Sobic.001G361300.1.p	S.bicolor v3.1.1	4.25e-52	32	379	+/+	seq.submitted 2021-10-26T22:07:08.867Z UTC	97	465	192	549	187.193	120	198	31	523	593
	phytozome-next.jgi.doe.gov/report/protein/Sbicolor_v3_1_1/Sobic.002G393200.1.p	Sobic.002G393200.1.p	S.bicolor v3.1.1	1.45e-49	39	246	+/+	seq.submitted 2021-10-26T22:07:08.867Z UTC	97	341	193	437	180.259	96	149	2	523	594
	phytozome-next.jgi.doe.gov/report/protein/Sbicolor_v3_1_1/Sobic.010G016900.1.p	Sobic.010G016900.1.p	S.bicolor v3.1.1	3.1e-49	40	242	+/+	seq.submitted 2021-10-26T22:07:08.867Z UTC	91	332	89	321	177.563	98	137	9	523	509
	phytozome-next.jgi.doe.gov/report/protein/Sbicolor_v3_1_1/Sobic.002G377300.1.p	Sobic.002G377300.1.p	S.bicolor v3.1.1	9.7e-46	31	343	+/+	seq.submitted 2021-10-26T22:07:08.867Z UTC	64	399	167	503	169.859	105	186	13	523	602
	phytozome-next.jgi.doe.gov/report/protein/Sbicolor_v3_1_1/Sobic.010G264400.1.p	Sobic.010G264400.1.p	S.bicolor v3.1.1	9.49e-45	29	412	+/+	seq.submitted 2021-10-26T22:07:08.867Z UTC	64	469	194	586	167.162	120	204	25	523	626
	phytozome-next.jgi.doe.gov/report/protein/Sbicolor_v3_1_1/Sobic.001G196800.1.p	Sobic.001G196800.1.p	S.bicolor v3.1.1	1.89e-44	32	321	+/+	seq.submitted 2021-10-26T22:07:08.867Z UTC	97	411	240	550	166.777	104	174	16	523	642
	phytozome-next.jgi.doe.gov/report/protein/Sbicolor_v3_1_1/Sobic.004G338000.1.p	Sobic.004G338000.1.p	S.bicolor v3.1.1	2.8e-43	40	202	+/+	seq.submitted 2021-10-26T22:07:08.867Z UTC	107	306	78	274	155.606	80	120	7	523	285
	phytozome-next.jgi.doe.gov/report/protein/Sbicolor_v3_1_1/Sobic.007G160600.2.p	Sobic.007G160600.2.p	S.bicolor v3.1.1	8.22e-42	38	208	+/+	seq.submitted 2021-10-26T22:07:08.867Z UTC	99	306	1	204	152.14	79	119	4	523	299
	phytozome-next.jgi.doe.gov/report/protein/Sbicolor_v3_1_1/Sobic.009G034200.4.p	Sobic.009G034200.4.p	S.bicolor v3.1.1	3.31e-35	39	211	+/+	seq.submitted 2021-10-26T22:07:08.867Z UTC	101	307	68	271	137.117	82	122	11	523	423
	phytozome-next.jgi.doe.gov/report/protein/Sbicolor_v3_1_1/Sobic.005G024200.2.p	Sobic.005G024200.2.p	S.bicolor v3.1.1	5.47e-35	35	261	+/+	seq.submitted 2021-10-26T22:07:08.867Z UTC	72	307	18	269	136.732	92	136	34	523	441
	phytozome-next.jgi.doe.gov/report/protein/Sbicolor_v3_1_1/Sobic.005G024200.4.p	Sobic.005G024200.4.p	S.bicolor v3.1.1	5.47e-35	35	261	+/+	seq.submitted 2021-10-26T22:07:08.867Z UTC	72	307	18	269	136.732	92	136	34	523	441
	phytozome-next.jgi.doe.gov/report/protein/Sbicolor_v3_1_1/Sobic.005G024200.3.p	Sobic.005G024200.3.p	S.bicolor v3.1.1	5.47e-35	35	261	+/+	seq.submitted 2021-10-26T22:07:08.867Z UTC	72	307	18	269	136.732	92	136	34	523	441
	phytozome-next.jgi.doe.gov/report/protein/Sbicolor_v3_1_1/Sobic.005G024200.1.p	Sobic.005G024200.1.p	S.bicolor v3.1.1	5.47e-35	35	261	+/+	seq.submitted 2021-10-26T22:07:08.867Z UTC	72	307	18	269	136.732	92	136	34	523	441
	phytozome-next.jgi.doe.gov/report/protein/Sbicolor_v3_1_1/Sobic.009G034200.3.p	Sobic.009G034200.3.p	S.bicolor v3.1.1	5.51e-35	39	211	+/+	seq.submitted 2021-10-26T22:07:08.867Z UTC	101	307	68	271	137.117	82	122	11	523	462
	phytozome-next.jgi.doe.gov/report/protein/Sbicolor_v3_1_1/Sobic.006G276000.1.p	Sobic.006G276000.1.p	S.bicolor v3.1.1	1.38e-34	39	208	+/+	seq.submitted 2021-10-26T22:07:08.867Z UTC	97	300	69	272	132.109	81	113	8	523	281
	phytozome-next.jgi.doe.gov/report/protein/Sbicolor_v3_1_1/Sobic.010G186300.1.p	Sobic.010G186300.1.p	S.bicolor v3.1.1	2.7e-34	37	229	+/+	seq.submitted 2021-10-26T22:07:08.867Z UTC	85	305	48	266	135.191	84	127	18	523	450
	phytozome-next.jgi.doe.gov/report/protein/Sbicolor_v3_1_1/Sobic.002G203000.1.p	Sobic.002G203000.1.p	S.bicolor v3.1.1	1.24e-33	37	225	+/+	seq.submitted 2021-10-26T22:07:08.867Z UTC	88	307	78	288	133.65	83	123	19	523	480
	phytozome-next.jgi.doe.gov/report/protein/Sbicolor_v3_1_1/Sobic.003G372200.2.p	Sobic.003G372200.2.p	S.bicolor v3.1.1	2.82e-33	38	215	+/+	seq.submitted 2021-10-26T22:07:08.867Z UTC	95	297	17	222	131.724	82	114	21	523	418
	phytozome-next.jgi.doe.gov/report/protein/Sbicolor_v3_1_1/Sobic.001G078600.1.p	Sobic.001G078600.1.p	S.bicolor v3.1.1	3.44e-33	35	215	+/+	seq.submitted 2021-10-26T22:07:08.867Z UTC	95	307	57	264	128.257	76	117	9	523	286
	phytozome-next.jgi.doe.gov/report/protein/Sbicolor_v3_1_1/Sobic.001G523200.1.p	Sobic.001G523200.1.p	S.bicolor v3.1.1	3.96e-33	36	242	+/+	seq.submitted 2021-10-26T22:07:08.867Z UTC	88	317	66	294	131.724	86	126	25	523	448
	phytozome-next.jgi.doe.gov/report/protein/Sbicolor_v3_1_1/Sobic.009G024900.2.p	Sobic.009G024900.2.p	S.bicolor v3.1.1	4.59e-33	36	203	+/+	seq.submitted 2021-10-26T22:07:08.867Z UTC	105	307	70	265	127.872	74	110	7	523	289
	phytozome-next.jgi.doe.gov/report/protein/Sbicolor_v3_1_1/Sobic.009G024900.1.p	Sobic.009G024900.1.p	S.bicolor v3.1.1	4.59e-33	36	203	+/+	seq.submitted 2021-10-26T22:07:08.867Z UTC	105	307	70	265	127.872	74	110	7	523	289
	phytozome-next.jgi.doe.gov/report/protein/Sbicolor_v3_1_1/Sobic.001G408200.7.p	Sobic.001G408200.7.p	S.bicolor v3.1.1	5.32e-33	37	215	+/+	seq.submitted 2021-10-26T22:07:08.867Z UTC	105	318	74	281	129.413	79	118	8	523	360
	phytozome-next.jgi.doe.gov/report/protein/Sbicolor_v3_1_1/Sobic.001G408200.5.p	Sobic.001G408200.5.p	S.bicolor v3.1.1	5.32e-33	37	215	+/+	seq.submitted 2021-10-26T22:07:08.867Z UTC	105	318	74	281	129.413	79	118	8	523	360
	phytozome-next.jgi.doe.gov/report/protein/Sbicolor_v3_1_1/Sobic.003G372200.1.p	Sobic.003G372200.1.p	S.bicolor v3.1.1	6.11e-33	38	215	+/+	seq.submitted 2021-10-26T22:07:08.867Z UTC	95	297	104	309	132.109	82	114	21	523	505
	phytozome-next.jgi.doe.gov/report/protein/Sbicolor_v3_1_1/Sobic.006G148300.1.p	Sobic.006G148300.1.p	S.bicolor v3.1.1	1.11e-32	34	215	+/+	seq.submitted 2021-10-26T22:07:08.867Z UTC	105	307	71	285	127.102	74	117	12	523	300
	phytozome-next.jgi.doe.gov/report/protein/Sbicolor_v3_1_1/Sobic.003G284000.2.p	Sobic.003G284000.2.p	S.bicolor v3.1.1	2.61e-32	40	205	+/+	seq.submitted 2021-10-26T22:07:08.867Z UTC	105	307	71	267	130.183	82	115	10	523	500
	phytozome-next.jgi.doe.gov/report/protein/Sbicolor_v3_1_1/Sobic.003G284000.1.p	Sobic.003G284000.1.p	S.bicolor v3.1.1	2.61e-32	40	205	+/+	seq.submitted 2021-10-26T22:07:08.867Z UTC	105	307	71	267	130.183	82	115	10	523	500
	phytozome-next.jgi.doe.gov/report/protein/Sbicolor_v3_1_1/Sobic.009G208100.1.p	Sobic.009G208100.1.p	S.bicolor v3.1.1	3.28e-32	35	257	+/+	seq.submitted 2021-10-26T22:07:08.867Z UTC	72	307	20	268	129.798	91	135	29	523	505
	phytozome-next.jgi.doe.gov/report/protein/Sbicolor_v3_1_1/Sobic.004G216200.2.p	Sobic.004G216200.2.p	S.bicolor v3.1.1	3.87e-32	34	214	+/+	seq.submitted 2021-10-26T22:07:08.867Z UTC	95	306	77	283	125.561	73	119	9	523	296
	phytozome-next.jgi.doe.gov/report/protein/Sbicolor_v3_1_1/Sobic.003G302600.1.p	Sobic.003G302600.1.p	S.bicolor v3.1.1	5.86e-32	35	228	+/+	seq.submitted 2021-10-26T22:07:08.867Z UTC	88	307	62	277	129.028	80	123	20	523	488
	phytozome-next.jgi.doe.gov/report/protein/Sbicolor_v3_1_1/Sobic.001G408200.6.p	Sobic.001G408200.6.p	S.bicolor v3.1.1	6.19e-32	37	215	+/+	seq.submitted 2021-10-26T22:07:08.867Z UTC	105	318	74	281	129.028	79	118	8	523	510
	phytozome-next.jgi.doe.gov/report/protein/Sbicolor_v3_1_1/Sobic.001G408200.2.p	Sobic.001G408200.2.p	S.bicolor v3.1.1	6.19e-32	37	215	+/+	seq.submitted 2021-10-26T22:07:08.867Z UTC	105	318	74	281	129.028	79	118	8	523	510
	phytozome-next.jgi.doe.gov/report/protein/Sbicolor_v3_1_1/Sobic.001G408200.3.p	Sobic.001G408200.3.p	S.bicolor v3.1.1	6.19e-32	37	215	+/+	seq.submitted 2021-10-26T22:07:08.867Z UTC	105	318	74	281	129.028	79	118	8	523	510
	phytozome-next.jgi.doe.gov/report/protein/Sbicolor_v3_1_1/Sobic.001G408200.1.p	Sobic.001G408200.1.p	S.bicolor v3.1.1	6.89e-32	37	215	+/+	seq.submitted 2021-10-26T22:07:08.867Z UTC	105	318	74	281	129.028	79	118	8	523	514
	phytozome-next.jgi.doe.gov/report/protein/Sbicolor_v3_1_1/Sobic.003G181800.2.p	Sobic.003G181800.2.p	S.bicolor v3.1.1	8.65e-32	38	205	+/+	seq.submitted 2021-10-26T22:07:08.867Z UTC	105	307	6	203	126.716	77	116	9	523	385
	phytozome-next.jgi.doe.gov/report/protein/Sbicolor_v3_1_1/Sobic.007G140900.1.p	Sobic.007G140900.1.p	S.bicolor v3.1.1	9.79e-32	35	222	+/+	seq.submitted 2021-10-26T22:07:08.867Z UTC	88	305	63	272	127.872	78	123	16	523	458
	phytozome-next.jgi.doe.gov/report/protein/Sbicolor_v3_1_1/Sobic.003G034600.1.p	Sobic.003G034600.1.p	S.bicolor v3.1.1	1.2e-31	34	214	+/+	seq.submitted 2021-10-26T22:07:08.867Z UTC	95	306	69	275	124.02	72	117	9	523	288
	phytozome-next.jgi.doe.gov/report/protein/Sbicolor_v3_1_1/Sobic.003G181800.1.p	Sobic.003G181800.1.p	S.bicolor v3.1.1	1.43e-31	38	205	+/+	seq.submitted 2021-10-26T22:07:08.867Z UTC	105	307	76	273	127.487	77	116	9	523	455
	phytozome-next.jgi.doe.gov/report/protein/Sbicolor_v3_1_1/Sobic.009G195800.2.p	Sobic.009G195800.2.p	S.bicolor v3.1.1	1.75e-31	34	224	+/+	seq.submitted 2021-10-26T22:07:08.867Z UTC	88	307	82	292	127.872	77	122	17	523	507
	phytozome-next.jgi.doe.gov/report/protein/Sbicolor_v3_1_1/Sobic.009G195800.3.p	Sobic.009G195800.3.p	S.bicolor v3.1.1	1.75e-31	34	224	+/+	seq.submitted 2021-10-26T22:07:08.867Z UTC	88	307	82	292	127.872	77	122	17	523	507
	phytozome-next.jgi.doe.gov/report/protein/Sbicolor_v3_1_1/Sobic.009G195800.1.p	Sobic.009G195800.1.p	S.bicolor v3.1.1	1.75e-31	34	224	+/+	seq.submitted 2021-10-26T22:07:08.867Z UTC	88	307	82	292	127.872	77	122	17	523	507
	phytozome-next.jgi.doe.gov/report/protein/Sbicolor_v3_1_1/Sobic.003G139500.1.p	Sobic.003G139500.1.p	S.bicolor v3.1.1	2.64e-31	36	217	+/+	seq.submitted 2021-10-26T22:07:08.867Z UTC	105	317	77	286	126.716	78	118	11	523	464
	phytozome-next.jgi.doe.gov/report/protein/Sbicolor_v3_1_1/Sobic.002G231300.2.p	Sobic.002G231300.2.p	S.bicolor v3.1.1	2.66e-31	39	205	+/+	seq.submitted 2021-10-26T22:07:08.867Z UTC	98	302	152	352	125.176	79	114	4	523	371
	phytozome-next.jgi.doe.gov/report/protein/Sbicolor_v3_1_1/Sobic.001G390200.1.p	Sobic.001G390200.1.p	S.bicolor v3.1.1	2.81e-31	35	245	+/+	seq.submitted 2021-10-26T22:07:08.867Z UTC	77	307	40	276	126.331	86	126	22	523	450
	phytozome-next.jgi.doe.gov/report/protein/Sbicolor_v3_1_1/Sobic.004G049500.3.p	Sobic.004G049500.3.p	S.bicolor v3.1.1	4.13e-31	36	225	+/+	seq.submitted 2021-10-26T22:07:08.867Z UTC	88	307	57	267	125.946	82	125	19	523	462
	phytozome-next.jgi.doe.gov/report/protein/Sbicolor_v3_1_1/Sobic.003G024600.1.p	Sobic.003G024600.1.p	S.bicolor v3.1.1	4.77e-31	35	224	+/+	seq.submitted 2021-10-26T22:07:08.867Z UTC	88	307	76	286	126.716	78	119	17	523	515
	phytozome-next.jgi.doe.gov/report/protein/Sbicolor_v3_1_1/Sobic.003G339700.1.p	Sobic.003G339700.1.p	S.bicolor v3.1.1	5.5e-31	36	225	+/+	seq.submitted 2021-10-26T22:07:08.867Z UTC	88	307	57	268	126.331	82	121	18	523	517
	phytozome-next.jgi.doe.gov/report/protein/Sbicolor_v3_1_1/Sobic.003G302800.1.p	Sobic.003G302800.1.p	S.bicolor v3.1.1	8.92e-31	35	224	+/+	seq.submitted 2021-10-26T22:07:08.867Z UTC	88	307	92	302	125.946	78	122	17	523	520
	phytozome-next.jgi.doe.gov/report/protein/Sbicolor_v3_1_1/Sobic.008G158100.1.p	Sobic.008G158100.1.p	S.bicolor v3.1.1	1.12e-30	31	315	+/+	seq.submitted 2021-10-26T22:07:08.867Z UTC	8	316	18	291	124.405	97	146	47	523	436
	phytozome-next.jgi.doe.gov/report/protein/Sbicolor_v3_1_1/Sobic.001G379600.1.p	Sobic.001G379600.1.p	S.bicolor v3.1.1	1.2e-30	35	225	+/+	seq.submitted 2021-10-26T22:07:08.867Z UTC	88	307	57	267	124.405	79	121	19	523	439
	phytozome-next.jgi.doe.gov/report/protein/Sbicolor_v3_1_1/Sobic.003G024400.1.p	Sobic.003G024400.1.p	S.bicolor v3.1.1	1.3e-30	32	305	+/+	seq.submitted 2021-10-26T22:07:08.867Z UTC	8	307	8	267	124.405	98	150	50	523	456
	phytozome-next.jgi.doe.gov/report/protein/Sbicolor_v3_1_1/Sobic.002G390100.1.p	Sobic.002G390100.1.p	S.bicolor v3.1.1	1.53e-30	36	208	+/+	seq.submitted 2021-10-26T22:07:08.867Z UTC	105	307	63	262	124.405	75	113	13	523	445
	phytozome-next.jgi.doe.gov/report/protein/Sbicolor_v3_1_1/Sobic.001G424700.2.p	Sobic.001G424700.2.p	S.bicolor v3.1.1	1.85e-30	35	222	+/+	seq.submitted 2021-10-26T22:07:08.867Z UTC	88	306	62	274	126.331	77	122	12	523	702
	phytozome-next.jgi.doe.gov/report/protein/Sbicolor_v3_1_1/Sobic.001G424700.1.p	Sobic.001G424700.1.p	S.bicolor v3.1.1	2.24e-30	35	222	+/+	seq.submitted 2021-10-26T22:07:08.867Z UTC	88	306	62	274	125.946	77	122	12	523	733
	phytozome-next.jgi.doe.gov/report/protein/Sbicolor_v3_1_1/Sobic.002G417300.2.p	Sobic.002G417300.2.p	S.bicolor v3.1.1	4.3e-30	36	248	+/+	seq.submitted 2021-10-26T22:07:08.867Z UTC	88	329	58	285	122.865	89	133	26	523	441
	phytozome-next.jgi.doe.gov/report/protein/Sbicolor_v3_1_1/Sobic.002G417300.1.p	Sobic.002G417300.1.p	S.bicolor v3.1.1	5.5e-30	36	248	+/+	seq.submitted 2021-10-26T22:07:08.867Z UTC	88	329	58	285	122.865	89	133	26	523	450
	phytozome-next.jgi.doe.gov/report/protein/Sbicolor_v3_1_1/Sobic.005G012000.1.p	Sobic.005G012000.1.p	S.bicolor v3.1.1	6.07e-30	39	180	+/+	seq.submitted 2021-10-26T22:07:08.867Z UTC	91	265	60	230	122.479	71	104	14	523	444
	phytozome-next.jgi.doe.gov/report/protein/Sbicolor_v3_1_1/Sobic.009G034200.5.p	Sobic.009G034200.5.p	S.bicolor v3.1.1	6.66e-30	40	189	+/+	seq.submitted 2021-10-26T22:07:08.867Z UTC	123	307	1	182	120.939	76	109	11	523	373
	phytozome-next.jgi.doe.gov/report/protein/Sbicolor_v3_1_1/Sobic.001G161200.1.p	Sobic.001G161200.1.p	S.bicolor v3.1.1	8.02e-30	31	319	+/+	seq.submitted 2021-10-26T22:07:08.867Z UTC	8	316	16	287	122.094	100	148	57	523	432
	phytozome-next.jgi.doe.gov/report/protein/Sbicolor_v3_1_1/Sobic.003G370100.1.p	Sobic.003G370100.1.p	S.bicolor v3.1.1	9.56e-30	35	218	+/+	seq.submitted 2021-10-26T22:07:08.867Z UTC	94	305	45	259	120.553	76	110	9	523	362
	phytozome-next.jgi.doe.gov/report/protein/Sbicolor_v3_1_1/Sobic.001G390200.2.p	Sobic.001G390200.2.p	S.bicolor v3.1.1	1.06e-29	37	208	+/+	seq.submitted 2021-10-26T22:07:08.867Z UTC	105	307	6	205	120.553	77	112	13	523	379
	phytozome-next.jgi.doe.gov/report/protein/Sbicolor_v3_1_1/Sobic.009G173100.1.p	Sobic.009G173100.1.p	S.bicolor v3.1.1	1.18e-29	35	225	+/+	seq.submitted 2021-10-26T22:07:08.867Z UTC	88	307	56	266	121.709	79	121	19	523	457
	phytozome-next.jgi.doe.gov/report/protein/Sbicolor_v3_1_1/Sobic.006G279100.1.p	Sobic.006G279100.1.p	S.bicolor v3.1.1	1.88e-29	35	218	+/+	seq.submitted 2021-10-26T22:07:08.867Z UTC	94	305	45	259	119.783	77	111	9	523	380
	phytozome-next.jgi.doe.gov/report/protein/Sbicolor_v3_1_1/Sobic.004G173500.1.p	Sobic.004G173500.1.p	S.bicolor v3.1.1	2.21e-29	35	218	+/+	seq.submitted 2021-10-26T22:07:08.867Z UTC	94	305	45	259	119.398	76	113	9	523	365
	phytozome-next.jgi.doe.gov/report/protein/Sbicolor_v3_1_1/Sobic.001G161200.2.p	Sobic.001G161200.2.p	S.bicolor v3.1.1	2.26e-29	35	239	+/+	seq.submitted 2021-10-26T22:07:08.867Z UTC	88	316	49	271	120.553	83	125	26	523	416
	Paralogs	Protein/Splice variants	Species	E-value	% identity	Align len	Strands	Query ID	Query from	Query to	Target from	Target to	Bitscore
	1	Sobic.010G260600.1.p	S.bicolor v3.1.1	0	70	519	+/+	seq.submitted 2021-10-26T22:07:08.867Z UTC	5	523	6	511	750.355

## Sheet: Brassica
	Views	Protein	Species	E-value	% identity	Align len	Strands	Query ID	Query from	Query to	Target from	Target to	Bitscore	# identical	Positives	Gaps	Query len	Target len
	phytozome-next.jgi.doe.gov/report/protein/BrapaFPsc_v1_3/Brara.C03333.1.p	Brara.C03333.1.p	B.rapaFPsc v1.3	8.68e-77	37	437	+/+	seq.submitted 2021-10-26T22:08:20.402Z UTC	87	511	204	608	254.218	160	237	44	523	630
	phytozome-next.jgi.doe.gov/report/protein/BrapaFPsc_v1_3/Brara.B03712.1.p	Brara.B03712.1.p	B.rapaFPsc v1.3	1.37e-76	34	511	+/+	seq.submitted 2021-10-26T22:08:20.402Z UTC	3	509	13	460	249.98	173	254	67	523	491
	phytozome-next.jgi.doe.gov/report/protein/BrapaFPsc_v1_3/Brara.E02997.1.p	Brara.E02997.1.p	B.rapaFPsc v1.3	1.9e-76	36	454	+/+	seq.submitted 2021-10-26T22:08:20.402Z UTC	69	511	181	602	253.062	163	241	43	523	623
	phytozome-next.jgi.doe.gov/report/protein/BrapaFPsc_v1_3/Brara.B00817.1.p	Brara.B00817.1.p	B.rapaFPsc v1.3	2.54e-76	35	419	+/+	seq.submitted 2021-10-26T22:08:20.402Z UTC	97	509	112	501	249.98	147	226	35	523	518
	phytozome-next.jgi.doe.gov/report/protein/BrapaFPsc_v1_3/Brara.J01648.1.p	Brara.J01648.1.p	B.rapaFPsc v1.3	4.41e-76	35	419	+/+	seq.submitted 2021-10-26T22:08:20.402Z UTC	97	509	110	499	249.21	146	226	35	523	518
	phytozome-next.jgi.doe.gov/report/protein/BrapaFPsc_v1_3/Brara.I00608.1.p	Brara.I00608.1.p	B.rapaFPsc v1.3	1.09e-75	33	511	+/+	seq.submitted 2021-10-26T22:08:20.402Z UTC	3	509	13	460	247.284	169	258	67	523	487
	phytozome-next.jgi.doe.gov/report/protein/BrapaFPsc_v1_3/Brara.J02705.1.p	Brara.J02705.1.p	B.rapaFPsc v1.3	1.61e-75	35	419	+/+	seq.submitted 2021-10-26T22:08:20.402Z UTC	97	511	182	572	249.595	148	226	32	523	593
	phytozome-next.jgi.doe.gov/report/protein/BrapaFPsc_v1_3/Brara.C01984.1.p	Brara.C01984.1.p	B.rapaFPsc v1.3	1.62e-75	36	420	+/+	seq.submitted 2021-10-26T22:08:20.402Z UTC	97	508	167	554	249.21	152	226	40	523	567
	phytozome-next.jgi.doe.gov/report/protein/BrapaFPsc_v1_3/Brara.A01377.1.p	Brara.A01377.1.p	B.rapaFPsc v1.3	4.16e-75	34	437	+/+	seq.submitted 2021-10-26T22:08:20.402Z UTC	75	509	103	511	246.899	149	228	30	523	526
	phytozome-next.jgi.doe.gov/report/protein/BrapaFPsc_v1_3/Brara.F02597.1.p	Brara.F02597.1.p	B.rapaFPsc v1.3	5.35e-75	36	415	+/+	seq.submitted 2021-10-26T22:08:20.402Z UTC	99	509	1	387	243.432	151	221	32	523	417
	phytozome-next.jgi.doe.gov/report/protein/BrapaFPsc_v1_3/Brara.G03397.1.p	Brara.G03397.1.p	B.rapaFPsc v1.3	1.26e-74	34	418	+/+	seq.submitted 2021-10-26T22:08:20.402Z UTC	98	512	153	543	246.514	143	221	30	523	553
	phytozome-next.jgi.doe.gov/report/protein/BrapaFPsc_v1_3/Brara.B00448.1.p	Brara.B00448.1.p	B.rapaFPsc v1.3	2.35e-74	34	415	+/+	seq.submitted 2021-10-26T22:08:20.402Z UTC	97	509	117	506	244.973	141	221	27	523	523
	phytozome-next.jgi.doe.gov/report/protein/BrapaFPsc_v1_3/Brara.C00506.1.p	Brara.C00506.1.p	B.rapaFPsc v1.3	4.57e-74	34	420	+/+	seq.submitted 2021-10-26T22:08:20.402Z UTC	97	514	118	512	244.202	143	223	27	523	524
	phytozome-next.jgi.doe.gov/report/protein/BrapaFPsc_v1_3/Brara.C00182.1.p	Brara.C00182.1.p	B.rapaFPsc v1.3	5.41e-74	35	433	+/+	seq.submitted 2021-10-26T22:08:20.402Z UTC	87	511	178	582	246.128	153	233	36	523	607
	phytozome-next.jgi.doe.gov/report/protein/BrapaFPsc_v1_3/Brara.E01819.1.p	Brara.E01819.1.p	B.rapaFPsc v1.3	9.01e-74	37	417	+/+	seq.submitted 2021-10-26T22:08:20.402Z UTC	97	509	75	463	242.662	154	218	32	523	498
	phytozome-next.jgi.doe.gov/report/protein/BrapaFPsc_v1_3/Brara.E01819.1.p	Brara.E01819.1.p	B.rapaFPsc v1.3	0.068	44	34	+/+	seq.submitted 2021-10-26T22:08:20.402Z UTC	479	512	327	360	36.1946	15	23	0	523	498
	phytozome-next.jgi.doe.gov/report/protein/BrapaFPsc_v1_3/Brara.B02654.1.p	Brara.B02654.1.p	B.rapaFPsc v1.3	1.13e-73	34	423	+/+	seq.submitted 2021-10-26T22:08:20.402Z UTC	97	514	119	511	243.047	145	225	35	523	521
	phytozome-next.jgi.doe.gov/report/protein/BrapaFPsc_v1_3/Brara.J02172.1.p	Brara.J02172.1.p	B.rapaFPsc v1.3	1.36e-73	34	417	+/+	seq.submitted 2021-10-26T22:08:20.402Z UTC	97	509	117	506	242.662	143	223	31	523	523
	phytozome-next.jgi.doe.gov/report/protein/BrapaFPsc_v1_3/Brara.K00706.1.p	Brara.K00706.1.p	B.rapaFPsc v1.3	1.79e-73	34	437	+/+	seq.submitted 2021-10-26T22:08:20.402Z UTC	76	509	111	518	242.662	149	232	32	523	533
	phytozome-next.jgi.doe.gov/report/protein/BrapaFPsc_v1_3/Brara.J01554.1.p	Brara.J01554.1.p	B.rapaFPsc v1.3	2.28e-73	33	511	+/+	seq.submitted 2021-10-26T22:08:20.402Z UTC	3	509	19	466	241.506	169	252	67	523	495
	phytozome-next.jgi.doe.gov/report/protein/BrapaFPsc_v1_3/Brara.B03710.1.p	Brara.B03710.1.p	B.rapaFPsc v1.3	2.88e-73	33	511	+/+	seq.submitted 2021-10-26T22:08:20.402Z UTC	3	509	13	460	240.736	168	251	67	523	485
	phytozome-next.jgi.doe.gov/report/protein/BrapaFPsc_v1_3/Brara.B03711.1.p	Brara.B03711.1.p	B.rapaFPsc v1.3	2.56e-72	33	517	+/+	seq.submitted 2021-10-26T22:08:20.402Z UTC	3	515	27	480	239.195	169	252	67	523	514
	phytozome-next.jgi.doe.gov/report/protein/BrapaFPsc_v1_3/Brara.C02607.1.p	Brara.C02607.1.p	B.rapaFPsc v1.3	7.89e-72	36	417	+/+	seq.submitted 2021-10-26T22:08:20.402Z UTC	97	509	75	463	237.654	150	217	32	523	501
	phytozome-next.jgi.doe.gov/report/protein/BrapaFPsc_v1_3/Brara.C02607.1.p	Brara.C02607.1.p	B.rapaFPsc v1.3	0.0711	44	34	+/+	seq.submitted 2021-10-26T22:08:20.402Z UTC	479	512	327	360	36.1946	15	23	0	523	501
	phytozome-next.jgi.doe.gov/report/protein/BrapaFPsc_v1_3/Brara.A01217.1.p	Brara.A01217.1.p	B.rapaFPsc v1.3	6.16e-71	34	423	+/+	seq.submitted 2021-10-26T22:08:20.402Z UTC	97	514	169	561	237.269	145	226	35	523	575
	phytozome-next.jgi.doe.gov/report/protein/BrapaFPsc_v1_3/Brara.C03790.1.p	Brara.C03790.1.p	B.rapaFPsc v1.3	7.5e-70	34	421	+/+	seq.submitted 2021-10-26T22:08:20.402Z UTC	95	508	133	526	233.417	144	228	34	523	543
	phytozome-next.jgi.doe.gov/report/protein/BrapaFPsc_v1_3/Brara.A00300.1.p	Brara.A00300.1.p	B.rapaFPsc v1.3	2.79e-69	35	424	+/+	seq.submitted 2021-10-26T22:08:20.402Z UTC	97	512	136	527	232.261	150	226	40	523	546
	phytozome-next.jgi.doe.gov/report/protein/BrapaFPsc_v1_3/Brara.F02560.1.p	Brara.F02560.1.p	B.rapaFPsc v1.3	4.33e-68	34	420	+/+	seq.submitted 2021-10-26T22:08:20.402Z UTC	97	512	130	521	228.794	144	223	32	523	540
	phytozome-next.jgi.doe.gov/report/protein/BrapaFPsc_v1_3/Brara.I01019.1.p	Brara.I01019.1.p	B.rapaFPsc v1.3	2.41e-67	34	420	+/+	seq.submitted 2021-10-26T22:08:20.402Z UTC	97	512	140	531	226.868	141	223	32	523	550
	phytozome-next.jgi.doe.gov/report/protein/BrapaFPsc_v1_3/Brara.D00630.2.p	Brara.D00630.2.p	B.rapaFPsc v1.3	2.8e-67	33	424	+/+	seq.submitted 2021-10-26T22:08:20.402Z UTC	88	508	99	493	226.483	138	227	32	523	529
	phytozome-next.jgi.doe.gov/report/protein/BrapaFPsc_v1_3/Brara.D00630.1.p	Brara.D00630.1.p	B.rapaFPsc v1.3	2.8e-67	33	424	+/+	seq.submitted 2021-10-26T22:08:20.402Z UTC	88	508	99	493	226.483	138	227	32	523	529
	phytozome-next.jgi.doe.gov/report/protein/BrapaFPsc_v1_3/Brara.C04385.1.p	Brara.C04385.1.p	B.rapaFPsc v1.3	4.08e-67	32	439	+/+	seq.submitted 2021-10-26T22:08:20.402Z UTC	81	516	94	501	225.713	142	233	34	523	529
	phytozome-next.jgi.doe.gov/report/protein/BrapaFPsc_v1_3/Brara.K00298.1.p	Brara.K00298.1.p	B.rapaFPsc v1.3	1.09e-66	34	438	+/+	seq.submitted 2021-10-26T22:08:20.402Z UTC	97	512	141	546	225.713	151	227	54	523	565
	phytozome-next.jgi.doe.gov/report/protein/BrapaFPsc_v1_3/Brara.G03159.1.p	Brara.G03159.1.p	B.rapaFPsc v1.3	1.45e-66	35	418	+/+	seq.submitted 2021-10-26T22:08:20.402Z UTC	98	508	115	503	224.942	145	219	36	523	547
	phytozome-next.jgi.doe.gov/report/protein/BrapaFPsc_v1_3/Brara.E00252.1.p	Brara.E00252.1.p	B.rapaFPsc v1.3	2.35e-66	33	406	+/+	seq.submitted 2021-10-26T22:08:20.402Z UTC	105	508	113	494	224.172	132	215	26	523	533
	phytozome-next.jgi.doe.gov/report/protein/BrapaFPsc_v1_3/Brara.F03923.1.p	Brara.F03923.1.p	B.rapaFPsc v1.3	4.97e-66	34	417	+/+	seq.submitted 2021-10-26T22:08:20.402Z UTC	97	509	74	462	221.861	141	220	32	523	482
	phytozome-next.jgi.doe.gov/report/protein/BrapaFPsc_v1_3/Brara.F03923.1.p	Brara.F03923.1.p	B.rapaFPsc v1.3	0.0323	47	38	+/+	seq.submitted 2021-10-26T22:08:20.402Z UTC	479	515	326	363	36.965	18	25	1	523	482
	phytozome-next.jgi.doe.gov/report/protein/BrapaFPsc_v1_3/Brara.B00823.1.p	Brara.B00823.1.p	B.rapaFPsc v1.3	5.66e-66	34	395	+/+	seq.submitted 2021-10-26T22:08:20.402Z UTC	98	467	109	499	223.016	135	214	29	523	535
	phytozome-next.jgi.doe.gov/report/protein/BrapaFPsc_v1_3/Brara.I03514.1.p	Brara.I03514.1.p	B.rapaFPsc v1.3	1.35e-65	32	424	+/+	seq.submitted 2021-10-26T22:08:20.402Z UTC	88	508	99	493	221.861	135	226	32	523	529
	phytozome-next.jgi.doe.gov/report/protein/BrapaFPsc_v1_3/Brara.D02546.1.p	Brara.D02546.1.p	B.rapaFPsc v1.3	1.64e-64	32	413	+/+	seq.submitted 2021-10-26T22:08:20.402Z UTC	98	508	106	494	219.164	132	218	26	523	532
	phytozome-next.jgi.doe.gov/report/protein/BrapaFPsc_v1_3/Brara.F01336.1.p	Brara.F01336.1.p	B.rapaFPsc v1.3	1.21e-63	33	415	+/+	seq.submitted 2021-10-26T22:08:20.402Z UTC	98	508	113	501	217.238	136	218	30	523	545
	phytozome-next.jgi.doe.gov/report/protein/BrapaFPsc_v1_3/Brara.J01642.1.p	Brara.J01642.1.p	B.rapaFPsc v1.3	2.31e-63	33	395	+/+	seq.submitted 2021-10-26T22:08:20.402Z UTC	98	467	109	499	216.083	131	211	29	523	535
	phytozome-next.jgi.doe.gov/report/protein/BrapaFPsc_v1_3/Brara.I04763.1.p	Brara.I04763.1.p	B.rapaFPsc v1.3	5.18e-62	33	415	+/+	seq.submitted 2021-10-26T22:08:20.402Z UTC	98	508	117	505	213.001	136	218	30	523	549
	phytozome-next.jgi.doe.gov/report/protein/BrapaFPsc_v1_3/Brara.J02143.1.p	Brara.J02143.1.p	B.rapaFPsc v1.3	9.74e-62	32	413	+/+	seq.submitted 2021-10-26T22:08:20.402Z UTC	98	508	107	496	211.846	134	212	25	523	533
	phytozome-next.jgi.doe.gov/report/protein/BrapaFPsc_v1_3/Brara.G01743.1.p	Brara.G01743.1.p	B.rapaFPsc v1.3	2.21e-61	31	417	+/+	seq.submitted 2021-10-26T22:08:20.402Z UTC	98	508	114	501	211.075	130	210	35	523	539
	phytozome-next.jgi.doe.gov/report/protein/BrapaFPsc_v1_3/Brara.I03972.1.p	Brara.I03972.1.p	B.rapaFPsc v1.3	2.07e-60	31	424	+/+	seq.submitted 2021-10-26T22:08:20.402Z UTC	91	508	114	504	208.379	133	213	39	523	542
	phytozome-next.jgi.doe.gov/report/protein/BrapaFPsc_v1_3/Brara.E01210.1.p	Brara.E01210.1.p	B.rapaFPsc v1.3	1.7e-59	31	433	+/+	seq.submitted 2021-10-26T22:08:20.402Z UTC	83	508	100	510	206.838	136	222	29	523	585
	phytozome-next.jgi.doe.gov/report/protein/BrapaFPsc_v1_3/Brara.D01902.1.p	Brara.D01902.1.p	B.rapaFPsc v1.3	4.6e-59	31	433	+/+	seq.submitted 2021-10-26T22:08:20.402Z UTC	83	508	97	507	205.682	135	216	29	523	581
	phytozome-next.jgi.doe.gov/report/protein/BrapaFPsc_v1_3/Brara.C01607.2.p	Brara.C01607.2.p	B.rapaFPsc v1.3	7.9e-59	32	433	+/+	seq.submitted 2021-10-26T22:08:20.402Z UTC	83	508	67	476	204.142	138	221	30	523	551
	phytozome-next.jgi.doe.gov/report/protein/BrapaFPsc_v1_3/Brara.I00917.1.p	Brara.I00917.1.p	B.rapaFPsc v1.3	8.49e-59	33	427	+/+	seq.submitted 2021-10-26T22:08:20.402Z UTC	97	508	127	519	204.142	139	216	49	523	539
	phytozome-next.jgi.doe.gov/report/protein/BrapaFPsc_v1_3/Brara.F02520.1.p	Brara.F02520.1.p	B.rapaFPsc v1.3	8.58e-59	32	419	+/+	seq.submitted 2021-10-26T22:08:20.402Z UTC	97	504	169	557	204.912	134	209	41	523	583
	phytozome-next.jgi.doe.gov/report/protein/BrapaFPsc_v1_3/Brara.F02520.1.p	Brara.F02520.1.p	B.rapaFPsc v1.3	0.0386	36	75	+/+	seq.submitted 2021-10-26T22:08:20.402Z UTC	441	515	427	496	36.965	27	41	5	523	583
	phytozome-next.jgi.doe.gov/report/protein/BrapaFPsc_v1_3/Brara.C01607.1.p	Brara.C01607.1.p	B.rapaFPsc v1.3	1.53e-58	32	433	+/+	seq.submitted 2021-10-26T22:08:20.402Z UTC	83	508	98	507	204.142	138	220	30	523	582
	phytozome-next.jgi.doe.gov/report/protein/BrapaFPsc_v1_3/Brara.G01274.1.p	Brara.G01274.1.p	B.rapaFPsc v1.3	5.59e-58	32	437	+/+	seq.submitted 2021-10-26T22:08:20.402Z UTC	98	519	117	519	201.445	141	218	49	523	528
	phytozome-next.jgi.doe.gov/report/protein/BrapaFPsc_v1_3/Brara.G00225.1.p	Brara.G00225.1.p	B.rapaFPsc v1.3	7.52e-58	32	419	+/+	seq.submitted 2021-10-26T22:08:20.402Z UTC	97	504	158	546	202.216	133	209	41	523	572
	phytozome-next.jgi.doe.gov/report/protein/BrapaFPsc_v1_3/Brara.G00225.1.p	Brara.G00225.1.p	B.rapaFPsc v1.3	0.0469	36	75	+/+	seq.submitted 2021-10-26T22:08:20.402Z UTC	441	515	416	485	36.5798	27	41	5	523	572
	phytozome-next.jgi.doe.gov/report/protein/BrapaFPsc_v1_3/Brara.D02174.1.p	Brara.D02174.1.p	B.rapaFPsc v1.3	1.67e-55	34	365	+/+	seq.submitted 2021-10-26T22:08:20.402Z UTC	91	440	175	505	194.512	125	189	49	523	516
	phytozome-next.jgi.doe.gov/report/protein/BrapaFPsc_v1_3/Brara.K01255.1.p	Brara.K01255.1.p	B.rapaFPsc v1.3	7.91e-53	40	257	+/+	seq.submitted 2021-10-26T22:08:20.402Z UTC	97	349	131	384	184.111	102	149	7	523	385
	phytozome-next.jgi.doe.gov/report/protein/BrapaFPsc_v1_3/Brara.I02207.1.p	Brara.I02207.1.p	B.rapaFPsc v1.3	8.68e-52	30	479	+/+	seq.submitted 2021-10-26T22:08:20.402Z UTC	44	514	30	453	183.341	146	219	63	523	460
	phytozome-next.jgi.doe.gov/report/protein/BrapaFPsc_v1_3/Brara.K01328.1.p	Brara.K01328.1.p	B.rapaFPsc v1.3	3.57e-50	30	442	+/+	seq.submitted 2021-10-26T22:08:20.402Z UTC	97	520	129	532	180.644	133	217	56	523	543
	phytozome-next.jgi.doe.gov/report/protein/BrapaFPsc_v1_3/Brara.A02895.2.p	Brara.A02895.2.p	B.rapaFPsc v1.3	9.16e-50	38	251	+/+	seq.submitted 2021-10-26T22:08:20.402Z UTC	97	346	192	441	179.874	96	149	2	523	565
	phytozome-next.jgi.doe.gov/report/protein/BrapaFPsc_v1_3/Brara.A02895.1.p	Brara.A02895.1.p	B.rapaFPsc v1.3	9.61e-50	32	378	+/+	seq.submitted 2021-10-26T22:08:20.402Z UTC	97	465	192	549	180.644	121	196	29	523	595
	phytozome-next.jgi.doe.gov/report/protein/BrapaFPsc_v1_3/Brara.E02289.1.p	Brara.E02289.1.p	B.rapaFPsc v1.3	1.15e-49	39	251	+/+	seq.submitted 2021-10-26T22:08:20.402Z UTC	97	346	194	443	180.259	97	148	2	523	597
	phytozome-next.jgi.doe.gov/report/protein/BrapaFPsc_v1_3/Brara.H00294.1.p	Brara.H00294.1.p	B.rapaFPsc v1.3	8.08e-48	37	262	+/+	seq.submitted 2021-10-26T22:08:20.402Z UTC	97	351	193	453	175.252	98	155	8	523	597
	phytozome-next.jgi.doe.gov/report/protein/BrapaFPsc_v1_3/Brara.H02649.1.p	Brara.H02649.1.p	B.rapaFPsc v1.3	1.18e-47	41	217	+/+	seq.submitted 2021-10-26T22:08:20.402Z UTC	91	307	92	303	173.326	90	131	5	523	525
	phytozome-next.jgi.doe.gov/report/protein/BrapaFPsc_v1_3/Brara.I05106.1.p	Brara.I05106.1.p	B.rapaFPsc v1.3	1.83e-47	41	227	+/+	seq.submitted 2021-10-26T22:08:20.402Z UTC	85	307	78	303	172.94	92	134	5	523	517
	phytozome-next.jgi.doe.gov/report/protein/BrapaFPsc_v1_3/Brara.C03726.1.p	Brara.C03726.1.p	B.rapaFPsc v1.3	2.61e-47	33	378	+/+	seq.submitted 2021-10-26T22:08:20.402Z UTC	97	465	189	547	173.711	123	195	28	523	593
	phytozome-next.jgi.doe.gov/report/protein/BrapaFPsc_v1_3/Brara.F01607.1.p	Brara.F01607.1.p	B.rapaFPsc v1.3	7.73e-47	33	303	+/+	seq.submitted 2021-10-26T22:08:20.402Z UTC	72	373	167	464	172.555	101	166	6	523	592
	phytozome-next.jgi.doe.gov/report/protein/BrapaFPsc_v1_3/Brara.I03399.1.p	Brara.I03399.1.p	B.rapaFPsc v1.3	2.18e-46	38	246	+/+	seq.submitted 2021-10-26T22:08:20.402Z UTC	97	341	194	438	171.4	93	145	2	523	595
	phytozome-next.jgi.doe.gov/report/protein/BrapaFPsc_v1_3/Brara.I00574.1.p	Brara.I00574.1.p	B.rapaFPsc v1.3	4.04e-46	34	271	+/+	seq.submitted 2021-10-26T22:08:20.402Z UTC	72	341	157	425	170.244	92	153	3	523	581
	phytozome-next.jgi.doe.gov/report/protein/BrapaFPsc_v1_3/Brara.F02066.1.p	Brara.F02066.1.p	B.rapaFPsc v1.3	5.8e-46	35	271	+/+	seq.submitted 2021-10-26T22:08:20.402Z UTC	72	341	174	442	170.244	94	152	3	523	599
	phytozome-next.jgi.doe.gov/report/protein/BrapaFPsc_v1_3/Brara.A02130.1.p	Brara.A02130.1.p	B.rapaFPsc v1.3	2.52e-45	32	343	+/+	seq.submitted 2021-10-26T22:08:20.402Z UTC	5	341	116	420	167.933	110	178	44	523	577
	phytozome-next.jgi.doe.gov/report/protein/BrapaFPsc_v1_3/Brara.A02130.2.p	Brara.A02130.2.p	B.rapaFPsc v1.3	2.64e-45	31	343	+/+	seq.submitted 2021-10-26T22:08:20.402Z UTC	5	341	116	414	167.933	108	173	50	523	571
	phytozome-next.jgi.doe.gov/report/protein/BrapaFPsc_v1_3/Brara.F02663.1.p	Brara.F02663.1.p	B.rapaFPsc v1.3	1.01e-44	34	271	+/+	seq.submitted 2021-10-26T22:08:20.402Z UTC	72	341	160	428	166.392	91	152	3	523	584
	phytozome-next.jgi.doe.gov/report/protein/BrapaFPsc_v1_3/Brara.H00281.1.p	Brara.H00281.1.p	B.rapaFPsc v1.3	7.47e-44	39	223	+/+	seq.submitted 2021-10-26T22:08:20.402Z UTC	86	306	116	334	161.384	88	131	6	523	453
	phytozome-next.jgi.doe.gov/report/protein/BrapaFPsc_v1_3/Brara.C02104.1.p	Brara.C02104.1.p	B.rapaFPsc v1.3	1.57e-43	29	411	+/+	seq.submitted 2021-10-26T22:08:20.402Z UTC	97	503	167	552	162.925	119	198	29	523	568
	phytozome-next.jgi.doe.gov/report/protein/BrapaFPsc_v1_3/Brara.D02813.1.p	Brara.D02813.1.p	B.rapaFPsc v1.3	8.89e-43	38	232	+/+	seq.submitted 2021-10-26T22:08:20.402Z UTC	97	327	197	426	160.999	87	140	3	523	597
	phytozome-next.jgi.doe.gov/report/protein/BrapaFPsc_v1_3/Brara.D02508.1.p	Brara.D02508.1.p	B.rapaFPsc v1.3	1.27e-42	29	412	+/+	seq.submitted 2021-10-26T22:08:20.402Z UTC	5	412	39	412	157.147	119	197	42	523	413
	phytozome-next.jgi.doe.gov/report/protein/BrapaFPsc_v1_3/Brara.D00330.1.p	Brara.D00330.1.p	B.rapaFPsc v1.3	1.72e-42	29	409	+/+	seq.submitted 2021-10-26T22:08:20.402Z UTC	97	503	171	556	159.844	117	199	25	523	572
	phytozome-next.jgi.doe.gov/report/protein/BrapaFPsc_v1_3/Brara.E00202.1.p	Brara.E00202.1.p	B.rapaFPsc v1.3	2.28e-42	28	411	+/+	seq.submitted 2021-10-26T22:08:20.402Z UTC	97	503	177	561	159.844	117	198	30	523	577
	phytozome-next.jgi.doe.gov/report/protein/BrapaFPsc_v1_3/Brara.I05099.1.p	Brara.I05099.1.p	B.rapaFPsc v1.3	3.13e-42	39	223	+/+	seq.submitted 2021-10-26T22:08:20.402Z UTC	86	306	140	358	157.532	86	129	6	523	475
	phytozome-next.jgi.doe.gov/report/protein/BrapaFPsc_v1_3/Brara.H02863.1.p	Brara.H02863.1.p	B.rapaFPsc v1.3	2.26e-40	34	232	+/+	seq.submitted 2021-10-26T22:08:20.402Z UTC	77	307	44	273	147.517	78	132	3	523	284
	phytozome-next.jgi.doe.gov/report/protein/BrapaFPsc_v1_3/Brara.E01219.1.p	Brara.E01219.1.p	B.rapaFPsc v1.3	8.38e-40	36	252	+/+	seq.submitted 2021-10-26T22:08:20.402Z UTC	88	338	76	315	149.443	91	138	13	523	417
	phytozome-next.jgi.doe.gov/report/protein/BrapaFPsc_v1_3/Brara.H02644.1.p	Brara.H02644.1.p	B.rapaFPsc v1.3	1.39e-39	40	209	+/+	seq.submitted 2021-10-26T22:08:20.402Z UTC	98	306	144	345	149.828	83	123	7	523	457
	phytozome-next.jgi.doe.gov/report/protein/BrapaFPsc_v1_3/Brara.F00543.1.p	Brara.F00543.1.p	B.rapaFPsc v1.3	2.42e-39	33	232	+/+	seq.submitted 2021-10-26T22:08:20.402Z UTC	77	307	49	278	144.821	77	134	3	523	289
	phytozome-next.jgi.doe.gov/report/protein/BrapaFPsc_v1_3/Brara.J02271.1.p	Brara.J02271.1.p	B.rapaFPsc v1.3	6.14e-37	29	443	+/+	seq.submitted 2021-10-26T22:08:20.402Z UTC	6	416	6	401	142.124	130	205	79	523	435
	phytozome-next.jgi.doe.gov/report/protein/BrapaFPsc_v1_3/Brara.I05592.1.p	Brara.I05592.1.p	B.rapaFPsc v1.3	1.18e-35	37	245	+/+	seq.submitted 2021-10-26T22:08:20.402Z UTC	88	317	64	293	137.502	91	130	30	523	391
	phytozome-next.jgi.doe.gov/report/protein/BrapaFPsc_v1_3/Brara.F02663.2.p	Brara.F02663.2.p	B.rapaFPsc v1.3	1.59e-35	31	270	+/+	seq.submitted 2021-10-26T22:08:20.402Z UTC	72	341	160	414	140.198	83	142	15	523	570
	phytozome-next.jgi.doe.gov/report/protein/BrapaFPsc_v1_3/Brara.A02065.1.p	Brara.A02065.1.p	B.rapaFPsc v1.3	7.3e-35	37	225	+/+	seq.submitted 2021-10-26T22:08:20.402Z UTC	88	307	66	278	135.961	84	119	17	523	433
	phytozome-next.jgi.doe.gov/report/protein/BrapaFPsc_v1_3/Brara.J00067.1.p	Brara.J00067.1.p	B.rapaFPsc v1.3	1.45e-34	38	240	+/+	seq.submitted 2021-10-26T22:08:20.402Z UTC	88	322	64	291	135.576	91	130	17	523	448
	phytozome-next.jgi.doe.gov/report/protein/BrapaFPsc_v1_3/Brara.F02713.1.p	Brara.F02713.1.p	B.rapaFPsc v1.3	4.47e-34	35	259	+/+	seq.submitted 2021-10-26T22:08:20.402Z UTC	88	329	59	304	134.42	90	131	30	523	458
	phytozome-next.jgi.doe.gov/report/protein/BrapaFPsc_v1_3/Brara.C01551.1.p	Brara.C01551.1.p	B.rapaFPsc v1.3	9.11e-34	34	237	+/+	seq.submitted 2021-10-26T22:08:20.402Z UTC	88	320	67	291	132.88	81	124	16	523	428
	phytozome-next.jgi.doe.gov/report/protein/BrapaFPsc_v1_3/Brara.F03101.1.p	Brara.F03101.1.p	B.rapaFPsc v1.3	1.02e-33	34	289	+/+	seq.submitted 2021-10-26T22:08:20.402Z UTC	51	318	7	284	134.035	98	149	32	523	513
	phytozome-next.jgi.doe.gov/report/protein/BrapaFPsc_v1_3/Brara.D02745.1.p	Brara.D02745.1.p	B.rapaFPsc v1.3	1.06e-33	35	202	+/+	seq.submitted 2021-10-26T22:08:20.402Z UTC	105	306	80	274	129.413	71	113	7	523	287
	phytozome-next.jgi.doe.gov/report/protein/BrapaFPsc_v1_3/Brara.C02961.1.p	Brara.C02961.1.p	B.rapaFPsc v1.3	1.1e-33	38	216	+/+	seq.submitted 2021-10-26T22:08:20.402Z UTC	105	318	71	278	134.035	83	117	10	523	502
	phytozome-next.jgi.doe.gov/report/protein/BrapaFPsc_v1_3/Brara.E03609.1.p	Brara.E03609.1.p	B.rapaFPsc v1.3	1.63e-33	39	216	+/+	seq.submitted 2021-10-26T22:08:20.402Z UTC	105	318	74	281	133.65	84	120	10	523	507
	phytozome-next.jgi.doe.gov/report/protein/BrapaFPsc_v1_3/Brara.J01224.1.p	Brara.J01224.1.p	B.rapaFPsc v1.3	2.54e-33	31	319	+/+	seq.submitted 2021-10-26T22:08:20.402Z UTC	8	320	8	281	132.109	98	157	51	523	462
	phytozome-next.jgi.doe.gov/report/protein/BrapaFPsc_v1_3/Brara.D01604.1.p	Brara.D01604.1.p	B.rapaFPsc v1.3	3.24e-33	39	223	+/+	seq.submitted 2021-10-26T22:08:20.402Z UTC	91	307	62	270	131.724	86	120	20	523	441
	phytozome-next.jgi.doe.gov/report/protein/BrapaFPsc_v1_3/Brara.E01291.1.p	Brara.E01291.1.p	B.rapaFPsc v1.3	3.59e-33	33	244	+/+	seq.submitted 2021-10-26T22:08:20.402Z UTC	88	320	53	277	131.339	81	126	30	523	428
	phytozome-next.jgi.doe.gov/report/protein/BrapaFPsc_v1_3/Brara.A01446.2.p	Brara.A01446.2.p	B.rapaFPsc v1.3	3.75e-33	35	255	+/+	seq.submitted 2021-10-26T22:08:20.402Z UTC	72	305	15	262	131.724	90	131	28	523	447
	phytozome-next.jgi.doe.gov/report/protein/BrapaFPsc_v1_3/Brara.A01446.1.p	Brara.A01446.1.p	B.rapaFPsc v1.3	3.75e-33	35	255	+/+	seq.submitted 2021-10-26T22:08:20.402Z UTC	72	305	15	262	131.724	90	131	28	523	447
	phytozome-next.jgi.doe.gov/report/protein/BrapaFPsc_v1_3/Brara.E00510.1.p	Brara.E00510.1.p	B.rapaFPsc v1.3	3.93e-33	35	202	+/+	seq.submitted 2021-10-26T22:08:20.402Z UTC	105	306	79	273	127.872	70	113	7	523	286
	phytozome-next.jgi.doe.gov/report/protein/BrapaFPsc_v1_3/Brara.K01630.1.p	Brara.K01630.1.p	B.rapaFPsc v1.3	4.12e-33	35	223	+/+	seq.submitted 2021-10-26T22:08:20.402Z UTC	88	307	66	277	128.642	79	126	14	523	321
	phytozome-next.jgi.doe.gov/report/protein/BrapaFPsc_v1_3/Brara.A03910.1.p	Brara.A03910.1.p	B.rapaFPsc v1.3	5.74e-33	38	216	+/+	seq.submitted 2021-10-26T22:08:20.402Z UTC	105	318	76	283	132.109	83	120	10	523	512
	phytozome-next.jgi.doe.gov/report/protein/BrapaFPsc_v1_3/Brara.E03439.1.p	Brara.E03439.1.p	B.rapaFPsc v1.3	9.48e-33	31	236	+/+	seq.submitted 2021-10-26T22:08:20.402Z UTC	77	306	41	273	126.716	74	134	9	523	283

## Sheet: Beta
	Views	Protein	Species	E-value	% identity	Align len	Strands	Query ID	Query from	Query to	Target from	Target to	Bitscore	# identical	Positives	Gaps	Query len	Target len
	phytozome-next.jgi.doe.gov/report/protein/Bvulgaris_EL10_1_0/EL10Ac4g09747.1	EL10Ac4g09747.1	B.vulgaris EL10_1.0	3.18e-78	38	419	+/+	seq.submitted 2021-10-26T22:10:00.029Z UTC	91	505	77	463	253.447	161	225	36	523	494
	phytozome-next.jgi.doe.gov/report/protein/Bvulgaris_EL10_1_0/EL10Ac5g11805.1	EL10Ac5g11805.1	B.vulgaris EL10_1.0	9.46e-78	38	421	+/+	seq.submitted 2021-10-26T22:10:00.029Z UTC	97	508	161	548	254.218	159	224	42	523	564
	phytozome-next.jgi.doe.gov/report/protein/Bvulgaris_EL10_1_0/EL10Ac5g12853.1	EL10Ac5g12853.1	B.vulgaris EL10_1.0	1.47e-76	35	417	+/+	seq.submitted 2021-10-26T22:10:00.029Z UTC	97	509	122	511	249.98	147	230	31	523	524
	phytozome-next.jgi.doe.gov/report/protein/Bvulgaris_EL10_1_0/EL10Ac1g00085.1	EL10Ac1g00085.1	B.vulgaris EL10_1.0	4.34e-75	37	420	+/+	seq.submitted 2021-10-26T22:10:00.029Z UTC	97	512	90	481	245.743	155	223	32	523	513
	phytozome-next.jgi.doe.gov/report/protein/Bvulgaris_EL10_1_0/EL10Ac4g08744.1	EL10Ac4g08744.1	B.vulgaris EL10_1.0	6.61e-75	36	434	+/+	seq.submitted 2021-10-26T22:10:00.029Z UTC	87	508	170	571	247.669	157	231	44	523	599
	phytozome-next.jgi.doe.gov/report/protein/Bvulgaris_EL10_1_0/EL10Ac1g02091.1	EL10Ac1g02091.1	B.vulgaris EL10_1.0	2.34e-73	35	427	+/+	seq.submitted 2021-10-26T22:10:00.029Z UTC	91	515	127	524	241.891	148	224	31	523	535
	phytozome-next.jgi.doe.gov/report/protein/Bvulgaris_EL10_1_0/EL10Ac4g10105.1	EL10Ac4g10105.1	B.vulgaris EL10_1.0	3.21e-73	33	415	+/+	seq.submitted 2021-10-26T22:10:00.029Z UTC	97	509	129	518	241.506	136	223	27	523	535
	phytozome-next.jgi.doe.gov/report/protein/Bvulgaris_EL10_1_0/EL10Ac4g10105.1	EL10Ac4g10105.1	B.vulgaris EL10_1.0	0.0799	30	60	+/+	seq.submitted 2021-10-26T22:10:00.029Z UTC	453	512	374	414	35.039	18	28	19	523	535
	phytozome-next.jgi.doe.gov/report/protein/Bvulgaris_EL10_1_0/EL10Ac8g20052.1	EL10Ac8g20052.1	B.vulgaris EL10_1.0	1.03e-67	33	424	+/+	seq.submitted 2021-10-26T22:10:00.029Z UTC	97	518	190	587	228.409	138	221	28	523	589
	phytozome-next.jgi.doe.gov/report/protein/Bvulgaris_EL10_1_0/EL10Ac5g12555.1	EL10Ac5g12555.1	B.vulgaris EL10_1.0	2.53e-64	33	448	+/+	seq.submitted 2021-10-26T22:10:00.029Z UTC	91	508	108	519	218.394	148	227	66	523	555
	phytozome-next.jgi.doe.gov/report/protein/Bvulgaris_EL10_1_0/EL10Ac3g07068.1	EL10Ac3g07068.1	B.vulgaris EL10_1.0	1.2e-63	33	392	+/+	seq.submitted 2021-10-26T22:10:00.029Z UTC	98	467	104	493	216.083	129	205	24	523	530
	phytozome-next.jgi.doe.gov/report/protein/Bvulgaris_EL10_1_0/EL10Ac4g10241.1	EL10Ac4g10241.1	B.vulgaris EL10_1.0	3.27e-62	32	421	+/+	seq.submitted 2021-10-26T22:10:00.029Z UTC	98	508	104	485	212.231	135	216	49	523	522
	phytozome-next.jgi.doe.gov/report/protein/Bvulgaris_EL10_1_0/EL10Ac3g05585.1	EL10Ac3g05585.1	B.vulgaris EL10_1.0	2.07e-60	34	415	+/+	seq.submitted 2021-10-26T22:10:00.029Z UTC	98	508	122	513	207.994	142	213	27	523	546
	phytozome-next.jgi.doe.gov/report/protein/Bvulgaris_EL10_1_0/EL10Ac5g11821.1	EL10Ac5g11821.1	B.vulgaris EL10_1.0	1.02e-58	33	417	+/+	seq.submitted 2021-10-26T22:10:00.029Z UTC	97	509	217	554	204.142	139	197	83	523	583
	phytozome-next.jgi.doe.gov/report/protein/Bvulgaris_EL10_1_0/EL10Ac4g07804.1	EL10Ac4g07804.1	B.vulgaris EL10_1.0	1.34e-57	31	413	+/+	seq.submitted 2021-10-26T22:10:00.029Z UTC	97	508	138	510	199.904	130	209	41	523	522
	phytozome-next.jgi.doe.gov/report/protein/Bvulgaris_EL10_1_0/EL10Ac5g10925.1	EL10Ac5g10925.1	B.vulgaris EL10_1.0	4.54e-55	34	374	+/+	seq.submitted 2021-10-26T22:10:00.029Z UTC	98	466	111	422	191.43	127	190	67	523	466
	phytozome-next.jgi.doe.gov/report/protein/Bvulgaris_EL10_1_0/EL10Ac9g21542.1	EL10Ac9g21542.1	B.vulgaris EL10_1.0	1.13e-53	32	456	+/+	seq.submitted 2021-10-26T22:10:00.029Z UTC	97	509	167	607	191.43	146	216	58	523	629
	phytozome-next.jgi.doe.gov/report/protein/Bvulgaris_EL10_1_0/EL10Ac6g15149.1	EL10Ac6g15149.1	B.vulgaris EL10_1.0	1.81e-52	34	338	+/+	seq.submitted 2021-10-26T22:10:00.029Z UTC	5	341	137	441	187.578	114	180	34	523	599
	phytozome-next.jgi.doe.gov/report/protein/Bvulgaris_EL10_1_0/EL10Ac3g05679.1	EL10Ac3g05679.1	B.vulgaris EL10_1.0	1.09e-47	40	239	+/+	seq.submitted 2021-10-26T22:10:00.029Z UTC	98	329	93	322	172.555	96	135	16	523	515
	phytozome-next.jgi.doe.gov/report/protein/Bvulgaris_EL10_1_0/EL10Ac3g07256.1	EL10Ac3g07256.1	B.vulgaris EL10_1.0	1.4e-45	39	248	+/+	seq.submitted 2021-10-26T22:10:00.029Z UTC	97	341	177	422	167.933	97	148	5	523	579
	phytozome-next.jgi.doe.gov/report/protein/Bvulgaris_EL10_1_0/EL10Ac1g00205.1	EL10Ac1g00205.1	B.vulgaris EL10_1.0	6.9e-44	30	384	+/+	seq.submitted 2021-10-26T22:10:00.029Z UTC	97	469	196	556	163.696	114	201	34	523	597
	phytozome-next.jgi.doe.gov/report/protein/Bvulgaris_EL10_1_0/EL10Ac4g09069.1	EL10Ac4g09069.1	B.vulgaris EL10_1.0	3.83e-43	38	215	+/+	seq.submitted 2021-10-26T22:10:00.029Z UTC	97	306	60	269	154.451	82	129	10	523	283
	phytozome-next.jgi.doe.gov/report/protein/Bvulgaris_EL10_1_0/EL10Ac3g05202.1	EL10Ac3g05202.1	B.vulgaris EL10_1.0	1.38e-41	36	255	+/+	seq.submitted 2021-10-26T22:10:00.029Z UTC	97	341	199	451	157.147	93	145	12	523	607
	phytozome-next.jgi.doe.gov/report/protein/Bvulgaris_EL10_1_0/EL10Ac8g19412.1	EL10Ac8g19412.1	B.vulgaris EL10_1.0	7.24e-41	39	217	+/+	seq.submitted 2021-10-26T22:10:00.029Z UTC	126	341	47	262	151.754	84	126	2	523	420
	phytozome-next.jgi.doe.gov/report/protein/Bvulgaris_EL10_1_0/EL10Ac1g01092.1	EL10Ac1g01092.1	B.vulgaris EL10_1.0	2.99e-38	37	223	+/+	seq.submitted 2021-10-26T22:10:00.029Z UTC	86	306	145	362	145.976	83	126	7	523	477
	phytozome-next.jgi.doe.gov/report/protein/Bvulgaris_EL10_1_0/EL10Ac7g15857.1	EL10Ac7g15857.1	B.vulgaris EL10_1.0	1.69e-35	33	307	+/+	seq.submitted 2021-10-26T22:10:00.029Z UTC	8	307	6	266	138.272	100	150	53	523	478
	phytozome-next.jgi.doe.gov/report/protein/Bvulgaris_EL10_1_0/EL10Ac8g19634.1	EL10Ac8g19634.1	B.vulgaris EL10_1.0	7.2e-35	36	221	+/+	seq.submitted 2021-10-26T22:10:00.029Z UTC	105	320	79	291	135.961	80	124	13	523	458
	phytozome-next.jgi.doe.gov/report/protein/Bvulgaris_EL10_1_0/EL10Ac2g03455.1	EL10Ac2g03455.1	B.vulgaris EL10_1.0	1.89e-34	31	315	+/+	seq.submitted 2021-10-26T22:10:00.029Z UTC	8	314	32	302	135.191	98	156	52	523	491
	phytozome-next.jgi.doe.gov/report/protein/Bvulgaris_EL10_1_0/EL10As9g23947.1	EL10As9g23947.1	B.vulgaris EL10_1.0	1.32e-33	36	216	+/+	seq.submitted 2021-10-26T22:10:00.029Z UTC	95	297	17	223	131.724	78	115	22	523	415
	phytozome-next.jgi.doe.gov/report/protein/Bvulgaris_EL10_1_0/EL10Ac7g17061.1	EL10Ac7g17061.1	B.vulgaris EL10_1.0	1.55e-33	32	305	+/+	seq.submitted 2021-10-26T22:10:00.029Z UTC	8	305	22	279	132.109	97	153	54	523	457
	phytozome-next.jgi.doe.gov/report/protein/Bvulgaris_EL10_1_0/EL10Ac8g18675.1	EL10Ac8g18675.1	B.vulgaris EL10_1.0	1.72e-33	35	235	+/+	seq.submitted 2021-10-26T22:10:00.029Z UTC	82	305	36	263	131.724	82	127	18	523	431
	phytozome-next.jgi.doe.gov/report/protein/Bvulgaris_EL10_1_0/EL10Ac1g00198.1	EL10Ac1g00198.1	B.vulgaris EL10_1.0	6.15e-33	32	314	+/+	seq.submitted 2021-10-26T22:10:00.029Z UTC	4	307	7	271	129.798	99	151	59	523	424
	phytozome-next.jgi.doe.gov/report/protein/Bvulgaris_EL10_1_0/EL10Ac7g17058.1	EL10Ac7g17058.1	B.vulgaris EL10_1.0	1.77e-32	37	239	+/+	seq.submitted 2021-10-26T22:10:00.029Z UTC	88	320	106	330	129.798	88	127	20	523	496
	phytozome-next.jgi.doe.gov/report/protein/Bvulgaris_EL10_1_0/EL10Ac5g11559.1	EL10Ac5g11559.1	B.vulgaris EL10_1.0	2.29e-32	34	219	+/+	seq.submitted 2021-10-26T22:10:00.029Z UTC	88	306	65	278	131.339	75	115	5	523	735
	phytozome-next.jgi.doe.gov/report/protein/Bvulgaris_EL10_1_0/EL10Ac2g03962.1	EL10Ac2g03962.1	B.vulgaris EL10_1.0	9.4e-32	36	214	+/+	seq.submitted 2021-10-26T22:10:00.029Z UTC	95	306	120	326	124.79	76	114	9	523	339
	phytozome-next.jgi.doe.gov/report/protein/Bvulgaris_EL10_1_0/EL10Ac9g22210.1	EL10Ac9g22210.1	B.vulgaris EL10_1.0	1.11e-31	37	227	+/+	seq.submitted 2021-10-26T22:10:00.029Z UTC	88	309	73	285	126.716	85	120	19	523	458
	phytozome-next.jgi.doe.gov/report/protein/Bvulgaris_EL10_1_0/EL10Ac9g21218.1	EL10Ac9g21218.1	B.vulgaris EL10_1.0	3.41e-31	31	296	+/+	seq.submitted 2021-10-26T22:10:00.029Z UTC	50	306	82	373	125.946	92	145	43	523	488
	phytozome-next.jgi.doe.gov/report/protein/Bvulgaris_EL10_1_0/EL10Ac3g06250.1	EL10Ac3g06250.1	B.vulgaris EL10_1.0	3.89e-31	31	301	+/+	seq.submitted 2021-10-26T22:10:00.029Z UTC	11	307	18	275	125.176	92	144	47	523	454
	phytozome-next.jgi.doe.gov/report/protein/Bvulgaris_EL10_1_0/EL10Ac6g14822.1	EL10Ac6g14822.1	B.vulgaris EL10_1.0	3.78e-30	35	218	+/+	seq.submitted 2021-10-26T22:10:00.029Z UTC	94	305	45	259	120.553	76	112	9	523	349
	phytozome-next.jgi.doe.gov/report/protein/Bvulgaris_EL10_1_0/EL10Ac1g00463.1	EL10Ac1g00463.1	B.vulgaris EL10_1.0	4.55e-30	33	277	+/+	seq.submitted 2021-10-26T22:10:00.029Z UTC	64	307	8	275	122.094	92	138	42	523	460
	phytozome-next.jgi.doe.gov/report/protein/Bvulgaris_EL10_1_0/EL10Ac8g20584.1	EL10Ac8g20584.1	B.vulgaris EL10_1.0	7.87e-30	34	233	+/+	seq.submitted 2021-10-26T22:10:00.029Z UTC	88	314	57	275	121.709	79	126	20	523	467
	phytozome-next.jgi.doe.gov/report/protein/Bvulgaris_EL10_1_0/EL10Ac6g15265.1	EL10Ac6g15265.1	B.vulgaris EL10_1.0	9.52e-30	36	197	+/+	seq.submitted 2021-10-26T22:10:00.029Z UTC	105	300	75	271	117.857	71	97	1	523	285
	phytozome-next.jgi.doe.gov/report/protein/Bvulgaris_EL10_1_0/EL10Ac8g20582.1	EL10Ac8g20582.1	B.vulgaris EL10_1.0	8.24e-29	35	225	+/+	seq.submitted 2021-10-26T22:10:00.029Z UTC	88	307	68	278	119.013	79	118	19	523	483
	phytozome-next.jgi.doe.gov/report/protein/Bvulgaris_EL10_1_0/EL10Ac5g10872.1	EL10Ac5g10872.1	B.vulgaris EL10_1.0	1.67e-28	32	208	+/+	seq.submitted 2021-10-26T22:10:00.029Z UTC	105	307	210	410	117.857	67	112	12	523	478
	phytozome-next.jgi.doe.gov/report/protein/Bvulgaris_EL10_1_0/EL10Ac2g04118.1	EL10Ac2g04118.1	B.vulgaris EL10_1.0	8.2e-28	28	309	+/+	seq.submitted 2021-10-26T22:10:00.029Z UTC	6	307	4	270	115.161	88	141	49	523	437
	phytozome-next.jgi.doe.gov/report/protein/Bvulgaris_EL10_1_0/EL10Ac8g18570.1	EL10Ac8g18570.1	B.vulgaris EL10_1.0	1.23e-27	36	184	+/+	seq.submitted 2021-10-26T22:10:00.029Z UTC	105	288	119	295	112.464	66	98	7	523	317
	phytozome-next.jgi.doe.gov/report/protein/Bvulgaris_EL10_1_0/EL10Ac7g15860.1	EL10Ac7g15860.1	B.vulgaris EL10_1.0	3.76e-27	29	314	+/+	seq.submitted 2021-10-26T22:10:00.029Z UTC	1	309	1	269	114.005	92	146	50	523	478
	phytozome-next.jgi.doe.gov/report/protein/Bvulgaris_EL10_1_0/EL10Ac1g00170.1	EL10Ac1g00170.1	B.vulgaris EL10_1.0	1.16e-26	34	209	+/+	seq.submitted 2021-10-26T22:10:00.029Z UTC	88	294	56	258	113.62	72	107	8	523	679
	phytozome-next.jgi.doe.gov/report/protein/Bvulgaris_EL10_1_0/EL10Ac3g05012.1	EL10Ac3g05012.1	B.vulgaris EL10_1.0	3.34e-26	28	219	+/+	seq.submitted 2021-10-26T22:10:00.029Z UTC	107	317	71	286	107.842	62	111	11	523	293
	phytozome-next.jgi.doe.gov/report/protein/Bvulgaris_EL10_1_0/EL10Ac2g04260.1	EL10Ac2g04260.1	B.vulgaris EL10_1.0	3.27e-25	29	248	+/+	seq.submitted 2021-10-26T22:10:00.029Z UTC	88	331	57	291	107.842	72	128	17	523	448
	phytozome-next.jgi.doe.gov/report/protein/Bvulgaris_EL10_1_0/EL10Ac7g17120.1	EL10Ac7g17120.1	B.vulgaris EL10_1.0	6.25e-25	30	274	+/+	seq.submitted 2021-10-26T22:10:00.029Z UTC	68	328	175	439	107.457	81	133	22	523	489
	phytozome-next.jgi.doe.gov/report/protein/Bvulgaris_EL10_1_0/EL10Ac7g15880.1	EL10Ac7g15880.1	B.vulgaris EL10_1.0	2.22e-24	30	309	+/+	seq.submitted 2021-10-26T22:10:00.029Z UTC	8	308	16	302	102.834	92	147	30	523	303
	phytozome-next.jgi.doe.gov/report/protein/Bvulgaris_EL10_1_0/EL10Ac8g18263.1	EL10Ac8g18263.1	B.vulgaris EL10_1.0	7.27e-24	29	241	+/+	seq.submitted 2021-10-26T22:10:00.029Z UTC	72	311	15	246	103.219	69	123	10	523	414
	phytozome-next.jgi.doe.gov/report/protein/Bvulgaris_EL10_1_0/EL10Ac6g13269.1	EL10Ac6g13269.1	B.vulgaris EL10_1.0	4.35e-23	37	172	+/+	seq.submitted 2021-10-26T22:10:00.029Z UTC	138	306	51	215	97.4413	63	93	10	523	228
	phytozome-next.jgi.doe.gov/report/protein/Bvulgaris_EL10_1_0/EL10Ac6g15606.1	EL10Ac6g15606.1	B.vulgaris EL10_1.0	6.18e-22	28	246	+/+	seq.submitted 2021-10-26T22:10:00.029Z UTC	77	307	37	266	95.5153	70	119	31	523	280
	phytozome-next.jgi.doe.gov/report/protein/Bvulgaris_EL10_1_0/EL10Ac9g22342.1	EL10Ac9g22342.1	B.vulgaris EL10_1.0	2.59e-21	32	220	+/+	seq.submitted 2021-10-26T22:10:00.029Z UTC	88	307	58	248	95.9005	71	100	29	523	427
	phytozome-next.jgi.doe.gov/report/protein/Bvulgaris_EL10_1_0/EL10Ac3g04994.1	EL10Ac3g04994.1	B.vulgaris EL10_1.0	5.6e-21	26	287	+/+	seq.submitted 2021-10-26T22:10:00.029Z UTC	69	308	140	422	95.9005	74	128	51	523	552
	phytozome-next.jgi.doe.gov/report/protein/Bvulgaris_EL10_1_0/EL10Ac3g05293.1	EL10Ac3g05293.1	B.vulgaris EL10_1.0	6.69e-21	27	299	+/+	seq.submitted 2021-10-26T22:10:00.029Z UTC	10	307	4	257	96.6709	81	134	46	523	1332
	phytozome-next.jgi.doe.gov/report/protein/Bvulgaris_EL10_1_0/EL10Ac3g05894.1	EL10Ac3g05894.1	B.vulgaris EL10_1.0	3.29e-20	30	228	+/+	seq.submitted 2021-10-26T22:10:00.029Z UTC	88	306	96	318	91.2781	69	113	14	523	323
	phytozome-next.jgi.doe.gov/report/protein/Bvulgaris_EL10_1_0/EL10Ac3g06539.1	EL10Ac3g06539.1	B.vulgaris EL10_1.0	4.11e-20	30	239	+/+	seq.submitted 2021-10-26T22:10:00.029Z UTC	69	300	23	251	93.9745	71	119	17	523	1356
	phytozome-next.jgi.doe.gov/report/protein/Bvulgaris_EL10_1_0/EL10Ac7g16253.1	EL10Ac7g16253.1	B.vulgaris EL10_1.0	4.62e-20	29	316	+/+	seq.submitted 2021-10-26T22:10:00.029Z UTC	8	306	395	672	93.2041	93	141	55	523	678
	phytozome-next.jgi.doe.gov/report/protein/Bvulgaris_EL10_1_0/EL10Ac8g19458.1	EL10Ac8g19458.1	B.vulgaris EL10_1.0	6.1e-20	29	265	+/+	seq.submitted 2021-10-26T22:10:00.029Z UTC	59	306	71	328	91.2781	77	125	24	523	372
	phytozome-next.jgi.doe.gov/report/protein/Bvulgaris_EL10_1_0/EL10Ac4g08978.1	EL10Ac4g08978.1	B.vulgaris EL10_1.0	1.03e-19	37	164	+/+	seq.submitted 2021-10-26T22:10:00.029Z UTC	147	305	79	239	89.7373	61	84	8	523	336
	phytozome-next.jgi.doe.gov/report/protein/Bvulgaris_EL10_1_0/EL10As5g23476.1	EL10As5g23476.1	B.vulgaris EL10_1.0	1.41e-19	27	265	+/+	seq.submitted 2021-10-26T22:10:00.029Z UTC	69	287	139	397	91.6633	72	125	52	523	560
	phytozome-next.jgi.doe.gov/report/protein/Bvulgaris_EL10_1_0/EL10Ac3g05819.1	EL10Ac3g05819.1	B.vulgaris EL10_1.0	1.45e-19	29	242	+/+	seq.submitted 2021-10-26T22:10:00.029Z UTC	93	297	679	916	92.0485	70	114	41	523	1043
	phytozome-next.jgi.doe.gov/report/protein/Bvulgaris_EL10_1_0/EL10Ac7g16406.1	EL10Ac7g16406.1	B.vulgaris EL10_1.0	1.51e-19	30	238	+/+	seq.submitted 2021-10-26T22:10:00.029Z UTC	79	309	168	393	90.5077	71	117	19	523	437
	phytozome-next.jgi.doe.gov/report/protein/Bvulgaris_EL10_1_0/EL10Ac4g09111.1	EL10Ac4g09111.1	B.vulgaris EL10_1.0	5.36e-19	30	232	+/+	seq.submitted 2021-10-26T22:10:00.029Z UTC	79	307	39	259	89.7373	69	113	14	523	609
	phytozome-next.jgi.doe.gov/report/protein/Bvulgaris_EL10_1_0/EL10Ac6g13259.1	EL10Ac6g13259.1	B.vulgaris EL10_1.0	1.08e-18	30	216	+/+	seq.submitted 2021-10-26T22:10:00.029Z UTC	105	313	224	432	88.1965	65	97	14	523	446
	phytozome-next.jgi.doe.gov/report/protein/Bvulgaris_EL10_1_0/EL10Ac2g02674.1	EL10Ac2g02674.1	B.vulgaris EL10_1.0	2.02e-18	27	237	+/+	seq.submitted 2021-10-26T22:10:00.029Z UTC	10	244	67	263	86.2705	64	111	42	523	354
	phytozome-next.jgi.doe.gov/report/protein/Bvulgaris_EL10_1_0/EL10Ac8g19161.1	EL10Ac8g19161.1	B.vulgaris EL10_1.0	3.49e-18	28	203	+/+	seq.submitted 2021-10-26T22:10:00.029Z UTC	106	306	125	317	85.5001	57	92	12	523	342
	phytozome-next.jgi.doe.gov/report/protein/Bvulgaris_EL10_1_0/EL10Ac5g10754.1	EL10Ac5g10754.1	B.vulgaris EL10_1.0	1.56e-17	25	250	+/+	seq.submitted 2021-10-26T22:10:00.029Z UTC	88	335	122	358	83.9593	62	111	15	523	374
	phytozome-next.jgi.doe.gov/report/protein/Bvulgaris_EL10_1_0/EL10Ac2g03819.1	EL10Ac2g03819.1	B.vulgaris EL10_1.0	1.9e-17	24	272	+/+	seq.submitted 2021-10-26T22:10:00.029Z UTC	69	288	46	313	84.3445	66	119	56	523	456
	phytozome-next.jgi.doe.gov/report/protein/Bvulgaris_EL10_1_0/EL10Ac9g21817.1	EL10Ac9g21817.1	B.vulgaris EL10_1.0	2.34e-17	34	164	+/+	seq.submitted 2021-10-26T22:10:00.029Z UTC	147	305	85	245	82.8037	56	79	8	523	331
	phytozome-next.jgi.doe.gov/report/protein/Bvulgaris_EL10_1_0/EL10Ac3g06324.1	EL10Ac3g06324.1	B.vulgaris EL10_1.0	2.95e-17	24	422	+/+	seq.submitted 2021-10-26T22:10:00.029Z UTC	10	376	23	405	84.3445	100	163	94	523	578
	phytozome-next.jgi.doe.gov/report/protein/Bvulgaris_EL10_1_0/EL10Ac8g18365.1	EL10Ac8g18365.1	B.vulgaris EL10_1.0	3.72e-17	28	228	+/+	seq.submitted 2021-10-26T22:10:00.029Z UTC	106	316	125	339	82.4185	63	104	30	523	355
	phytozome-next.jgi.doe.gov/report/protein/Bvulgaris_EL10_1_0/EL10Ac8g20388.1	EL10Ac8g20388.1	B.vulgaris EL10_1.0	5.22e-17	29	199	+/+	seq.submitted 2021-10-26T22:10:00.029Z UTC	105	301	244	437	83.1889	57	91	7	523	492
	phytozome-next.jgi.doe.gov/report/protein/Bvulgaris_EL10_1_0/EL10Ac5g10509.1	EL10Ac5g10509.1	B.vulgaris EL10_1.0	1.05e-16	28	219	+/+	seq.submitted 2021-10-26T22:10:00.029Z UTC	105	307	14	229	82.4185	61	110	19	523	578
	phytozome-next.jgi.doe.gov/report/protein/Bvulgaris_EL10_1_0/EL10Ac4g07710.1	EL10Ac4g07710.1	B.vulgaris EL10_1.0	1.25e-16	28	204	+/+	seq.submitted 2021-10-26T22:10:00.029Z UTC	107	306	160	359	82.4185	58	107	8	523	557
	phytozome-next.jgi.doe.gov/report/protein/Bvulgaris_EL10_1_0/EL10Ac4g07853.1	EL10Ac4g07853.1	B.vulgaris EL10_1.0	2.06e-16	30	233	+/+	seq.submitted 2021-10-26T22:10:00.029Z UTC	105	307	75	300	81.2629	69	104	37	523	466
	phytozome-next.jgi.doe.gov/report/protein/Bvulgaris_EL10_1_0/EL10Ac1g01163.1	EL10Ac1g01163.1	B.vulgaris EL10_1.0	2.15e-16	33	164	+/+	seq.submitted 2021-10-26T22:10:00.029Z UTC	147	305	65	225	79.337	54	82	8	523	302
	phytozome-next.jgi.doe.gov/report/protein/Bvulgaris_EL10_1_0/EL10Ac6g13630.1	EL10Ac6g13630.1	B.vulgaris EL10_1.0	2.5e-16	28	327	+/+	seq.submitted 2021-10-26T22:10:00.029Z UTC	1	303	55	336	80.1073	92	143	69	523	359
	phytozome-next.jgi.doe.gov/report/protein/Bvulgaris_EL10_1_0/EL10Ac3g06992.1	EL10Ac3g06992.1	B.vulgaris EL10_1.0	2.53e-16	28	210	+/+	seq.submitted 2021-10-26T22:10:00.029Z UTC	105	307	71	270	81.6481	59	103	17	523	628
	phytozome-next.jgi.doe.gov/report/protein/Bvulgaris_EL10_1_0/EL10Ac9g22395.1	EL10Ac9g22395.1	B.vulgaris EL10_1.0	3.68e-16	28	235	+/+	seq.submitted 2021-10-26T22:10:00.029Z UTC	105	306	93	323	79.7221	66	109	37	523	368
	phytozome-next.jgi.doe.gov/report/protein/Bvulgaris_EL10_1_0/EL10Ac3g06118.1	EL10Ac3g06118.1	B.vulgaris EL10_1.0	4.83e-16	28	236	+/+	seq.submitted 2021-10-26T22:10:00.029Z UTC	105	308	125	356	79.7221	66	108	36	523	403
	phytozome-next.jgi.doe.gov/report/protein/Bvulgaris_EL10_1_0/EL10Ac8g18269.1	EL10Ac8g18269.1	B.vulgaris EL10_1.0	5.86e-16	31	203	+/+	seq.submitted 2021-10-26T22:10:00.029Z UTC	105	300	904	1103	80.8777	63	102	10	523	1118
	phytozome-next.jgi.doe.gov/report/protein/Bvulgaris_EL10_1_0/EL10Ac5g11525.1	EL10Ac5g11525.1	B.vulgaris EL10_1.0	7.05e-16	26	371	+/+	seq.submitted 2021-10-26T22:10:00.029Z UTC	9	333	110	436	80.1073	98	153	90	523	609
	phytozome-next.jgi.doe.gov/report/protein/Bvulgaris_EL10_1_0/EL10Ac8g20155.1	EL10Ac8g20155.1	B.vulgaris EL10_1.0	1.01e-15	28	236	+/+	seq.submitted 2021-10-26T22:10:00.029Z UTC	102	304	58	284	77.7962	66	104	42	523	326
	phytozome-next.jgi.doe.gov/report/protein/Bvulgaris_EL10_1_0/EL10Ac1g00373.1	EL10Ac1g00373.1	B.vulgaris EL10_1.0	1.23e-15	29	235	+/+	seq.submitted 2021-10-26T22:10:00.029Z UTC	105	306	88	318	78.1814	68	110	37	523	367
	phytozome-next.jgi.doe.gov/report/protein/Bvulgaris_EL10_1_0/EL10Ac5g12878.1	EL10Ac5g12878.1	B.vulgaris EL10_1.0	1.42e-15	26	255	+/+	seq.submitted 2021-10-26T22:10:00.029Z UTC	60	299	100	338	78.1814	66	117	31	523	386
	phytozome-next.jgi.doe.gov/report/protein/Bvulgaris_EL10_1_0/EL10Ac6g15014.1	EL10Ac6g15014.1	B.vulgaris EL10_1.0	1.67e-15	28	207	+/+	seq.submitted 2021-10-26T22:10:00.029Z UTC	105	307	340	540	79.337	58	98	10	523	870
	phytozome-next.jgi.doe.gov/report/protein/Bvulgaris_EL10_1_0/EL10Ac4g08439.1	EL10Ac4g08439.1	B.vulgaris EL10_1.0	1.92e-15	25	360	+/+	seq.submitted 2021-10-26T22:10:00.029Z UTC	9	333	81	402	78.9518	91	152	73	523	664
	phytozome-next.jgi.doe.gov/report/protein/Bvulgaris_EL10_1_0/EL10Ac7g16312.1	EL10Ac7g16312.1	B.vulgaris EL10_1.0	2.19e-15	28	211	+/+	seq.submitted 2021-10-26T22:10:00.029Z UTC	105	307	47	246	78.9518	59	102	19	523	1103
	phytozome-next.jgi.doe.gov/report/protein/Bvulgaris_EL10_1_0/EL10Ac6g14278.1	EL10Ac6g14278.1	B.vulgaris EL10_1.0	2.85e-15	29	275	+/+	seq.submitted 2021-10-26T22:10:00.029Z UTC	91	320	39	303	76.6406	79	122	55	523	328
	phytozome-next.jgi.doe.gov/report/protein/Bvulgaris_EL10_1_0/EL10Ac9g22398.1	EL10Ac9g22398.1	B.vulgaris EL10_1.0	4.11e-15	27	251	+/+	seq.submitted 2021-10-26T22:10:00.029Z UTC	105	318	100	340	76.6406	67	113	47	523	377
	phytozome-next.jgi.doe.gov/report/protein/Bvulgaris_EL10_1_0/EL10Ac8g20398.1	EL10Ac8g20398.1	B.vulgaris EL10_1.0	4.18e-15	27	233	+/+	seq.submitted 2021-10-26T22:10:00.029Z UTC	102	305	447	674	77.7962	62	102	34	523	720
	phytozome-next.jgi.doe.gov/report/protein/Bvulgaris_EL10_1_0/EL10Ac8g20154.1	EL10Ac8g20154.1	B.vulgaris EL10_1.0	5.32e-15	28	236	+/+	seq.submitted 2021-10-26T22:10:00.029Z UTC	102	304	58	284	75.485	65	104	42	523	326
	phytozome-next.jgi.doe.gov/report/protein/Bvulgaris_EL10_1_0/EL10Ac8g20152.1	EL10Ac8g20152.1	B.vulgaris EL10_1.0	5.47e-15	28	238	+/+	seq.submitted 2021-10-26T22:10:00.029Z UTC	102	304	58	286	75.485	66	102	44	523	328
	phytozome-next.jgi.doe.gov/report/protein/Bvulgaris_EL10_1_0/EL10Ac8g20150.1	EL10Ac8g20150.1	B.vulgaris EL10_1.0	5.47e-15	28	238	+/+	seq.submitted 2021-10-26T22:10:00.029Z UTC	102	304	58	286	75.485	66	102	44	523	328
	phytozome-next.jgi.doe.gov/report/protein/Bvulgaris_EL10_1_0/EL10Ac7g17936.1	EL10Ac7g17936.1	B.vulgaris EL10_1.0	6.47e-15	28	246	+/+	seq.submitted 2021-10-26T22:10:00.029Z UTC	91	305	50	282	76.2554	70	111	44	523	435
	phytozome-next.jgi.doe.gov/report/protein/Bvulgaris_EL10_1_0/EL10Ac6g13341.1	EL10Ac6g13341.1	B.vulgaris EL10_1.0	7.35e-15	28	220	+/+	seq.submitted 2021-10-26T22:10:00.029Z UTC	91	301	341	542	76.6406	61	102	27	523	557
	phytozome-next.jgi.doe.gov/report/protein/Bvulgaris_EL10_1_0/EL10Ac2g03293.1	EL10Ac2g03293.1	B.vulgaris EL10_1.0	7.59e-15	29	233	+/+	seq.submitted 2021-10-26T22:10:00.029Z UTC	79	300	935	1153	77.411	67	112	25	523	1177

[truncated: 2 more sheets: S. lycopersicum, S. tuberosum]
