# Supplementary material for: Glycine max Homologs of DOESN'T MAKE INFECTIONS 1, 2, and 3 Function to Impair Heterodera glycines Parasitism While Also Regulating Mitogen Activated Protein Kinase Expression
Source: Front Plant Sci. 2022 May 4;13:842597. doi: 10.3389/fpls.2022.842597 (PMC9114929; doi:10.3389/fpls.2022.842597)
Supplement: Supplementary Table 7 — DMI gene expression in defense MAPK-overexpressing (MAPK-OE) root RNA as compared to the pRAP15-ccdB control root RNA. RNA-seq data whose differential expression is presented as an RTA that represents FC; obtained from Alshehri et al. (2019) (p < 0.001) (Wang and Wang, 2021). Please refer to Materials and Methods subsection: RNA-seq gene expression analyses of transgenic MAPK-OE and -RNAi root RNA, for details. [file Table_7.xlsx]

## Sheet: Sheet1
DMI1
MK-OE Sample	Gene name	Accession 1 (2010)	Accession 2 (2015)	Description	value1	value2	log2(Fold_change)	log2(Fold_change) normalized	p-value	q-value(Benjamini et al. 1995)	q-value(Storey et al. 2003)	Signature(p-value < 0.001)
MK2-OE	DMI1-1	Glyma12g28860	Glyma.12G167300	PTHR31563:SF1 - ION CHANNEL POLLUX-RELATED	983	850	0.209729	0.529773	4.11e-15	1.22e-14	1.63e-15	TRUE
	DMI1-2	Glyma16g00500	Glyma.16G003300	PTHR31563:SF1 - ION CHANNEL POLLUX-RELATED	not expressed	not expressed	n/a	n/a	n/a	n/a	n/a	n/a
	DMI1-3	Glyma19g45310	Glyma.19G263500	PF06241 - Castor and Pollux	1151	2045	-0.829213	-0.509168	0	0	0	TRUE
MK3-1-OE	DMI1-1	Glyma12g28860	Glyma.12G167300	PTHR31563:SF1 - ION CHANNEL POLLUX-RELATED	983	254	1.95236	2.31716	0	0	0	TRUE
	DMI1-2	Glyma16g00500	Glyma.16G003300	PTHR31563:SF1 - ION CHANNEL POLLUX-RELATED	not expressed	not expressed	n/a	n/a	n/a	n/a	n/a	n/a
	DMI1-3	Glyma19g45310	Glyma.19G263500	PF06241 - Castor and Pollux	not expressed	not expressed	n/a	n/a	n/a	n/a	n/a	n/a
MK3-2-OE	DMI1-1	Glyma12g28860	Glyma.12G167300	PTHR31563:SF1 - ION CHANNEL POLLUX-RELATED	not expressed	not expressed	n/a	n/a	n/a	n/a	n/a	n/a
	DMI1-2	Glyma16g00500	Glyma.16G003300	PTHR31563:SF1 - ION CHANNEL POLLUX-RELATED	not expressed	not expressed	n/a	n/a	n/a	n/a	n/a	n/a
	DMI1-3	Glyma19g45310	Glyma.19G263500	PF06241 - Castor and Pollux	not expressed	not expressed	n/a	n/a	n/a	n/a	n/a	n/a
MK4-1-OE	DMI1-1	Glyma12g28860	Glyma.12G167300	PTHR31563:SF1 - ION CHANNEL POLLUX-RELATED	not expressed	not expressed	n/a	n/a	n/a	n/a	n/a	n/a
	DMI1-2	Glyma16g00500	Glyma.16G003300	PTHR31563:SF1 - ION CHANNEL POLLUX-RELATED	not expressed	not expressed	n/a	n/a	n/a	n/a	n/a	n/a
	DMI1-3	Glyma19g45310	Glyma.19G263500	PF06241 - Castor and Pollux	not expressed	not expressed	n/a	n/a	n/a	n/a	n/a	n/a
MK5-3-OE	DMI1-1	Glyma12g28860	Glyma.12G167300	PTHR31563:SF1 - ION CHANNEL POLLUX-RELATED	not expressed	not expressed	n/a	n/a	n/a	n/a	n/a	n/a
	DMI1-2	Glyma16g00500	Glyma.16G003300	PTHR31563:SF1 - ION CHANNEL POLLUX-RELATED	not expressed	not expressed	n/a	n/a	n/a	n/a	n/a	n/a
	DMI1-3	Glyma19g45310	Glyma.19G263500	PF06241 - Castor and Pollux	not expressed	not expressed	n/a	n/a	n/a	n/a	n/a	n/a
MK6-2-OE	DMI1-1	Glyma12g28860	Glyma.12G167300	PTHR31563:SF1 - ION CHANNEL POLLUX-RELATED	983	453	1.11768	1.15453	0	0	0	TRUE
	DMI1-2	Glyma16g00500	Glyma.16G003300	PTHR31563:SF1 - ION CHANNEL POLLUX-RELATED	not expressed	not expressed	n/a	n/a	n/a	n/a	n/a	n/a
	DMI1-3	Glyma19g45310	Glyma.19G263500	PF06241 - Castor and Pollux	not expressed	not expressed	n/a	n/a	n/a	n/a	n/a	n/a
MK13-1-OE	DMI1-1	Glyma12g28860	Glyma.12G167300	PTHR31563:SF1 - ION CHANNEL POLLUX-RELATED	983	370	1.40967	1.42839	0	0	0	TRUE
	DMI1-2	Glyma16g00500	Glyma.16G003300	PTHR31563:SF1 - ION CHANNEL POLLUX-RELATED	not expressed	not expressed	n/a	n/a	n/a	n/a	n/a	n/a
	DMI1-3	Glyma19g45310	Glyma.19G263500	PF06241 - Castor and Pollux	not expressed	not expressed	n/a	n/a	n/a	n/a	n/a	n/a
MK16-4-OE	DMI1-1	Glyma12g28860	Glyma.12G167300	PTHR31563:SF1 - ION CHANNEL POLLUX-RELATED	not expressed	not expressed	n/a	n/a	n/a	n/a	n/a	n/a
	DMI1-2	Glyma16g00500	Glyma.16G003300	PTHR31563:SF1 - ION CHANNEL POLLUX-RELATED	not expressed	not expressed	n/a	n/a	n/a	n/a	n/a	n/a
	DMI1-3	Glyma19g45310	Glyma.19G263500	PF06241 - Castor and Pollux	not expressed	not expressed	n/a	n/a	n/a	n/a	n/a	n/a
MK20-2-OE	DMI1-1	Glyma12g28860	Glyma.12G167300	PTHR31563:SF1 - ION CHANNEL POLLUX-RELATED	not expressed	not expressed	n/a	n/a	n/a	n/a	n/a	n/a
	DMI1-2	Glyma16g00500	Glyma.16G003300	PTHR31563:SF1 - ION CHANNEL POLLUX-RELATED	not expressed	not expressed	n/a	n/a	n/a	n/a	n/a	n/a
	DMI1-3	Glyma19g45310	Glyma.19G263500	PF06241 - Castor and Pollux	not expressed	not expressed	n/a	n/a	n/a	n/a	n/a	n/a
DMI2
Sample	Gene name	Accession 1 (2010)	Accession 2 (2015)	Description	value1	value2	log2(Fold_change)	log2(Fold_change) normalized	p-value	q-value(Benjamini et al. 1995)	q-value(Storey et al. 2003)	Signature(p-value < 0.001)
MK2-OE	DMI2-1	Glyma01g02451	Glyma.01G020100	Leucine-rich repeat protein kinase family protein	not expressed	not expressed	n/a	n/a	n/a	n/a	n/a	n/a
	DMI2-2	Glyma03g33480	Glyma.03G177600	Leucine-rich repeat protein kinase family protein	not expressed	not expressed	n/a	n/a	n/a	n/a	n/a	n/a
	DMI2-3	Glyma05g27650	Glyma.05G144400	Leucine-rich repeat protein kinase family protein	420	76	2.46632	2.78636	0	0	0	TRUE
	DMI2-4	Glyma08g10640	Glyma.08G100800	Leucine-rich repeat protein kinase family protein	459	215	1.09416	1.4142	0	0	0	TRUE
	DMI2-5	Glyma09g33510	Glyma.09G202300	Leucine-rich repeat protein kinase family protein	7723	7916	-0.0356102	0.284435	0	0	0	TRUE
	DMI2-6	Glyma10g05600	Glyma.10G048800	Leucine-rich repeat protein kinase family protein	not expressed	not expressed	n/a	n/a	n/a	n/a	n/a	n/a
	DMI2-7	Glyma11g37500	Glyma.11G246200	Leucine-rich repeat protein kinase family protein	286	212	0.431951	0.751996	6.88e-09	1.6e-08	2.15e-09	TRUE
	DMI2-8	Glyma13g19960	Glyma.13G136700	Leucine-rich repeat protein kinase family protein	32	101	-1.65821	-1.33817	9.98e-07	2.07e-06	2.78e-07	TRUE
	DMI2-9	Glyma13g42941	Glyma.13G352900	Leucine-rich repeat protein kinase family protein	13	18	-0.469485	-0.149441	0.775397	0.804801	0.108087	FALSE
	DMI2-10	Glyma15g02450.	Glyma.15G021400	Leucine-rich repeat protein kinase family protein	60	83	-0.468149	-0.148104	0.543616	0.587981	0.0789707	FALSE
	DMI2-11	Glyma18g01450	Glyma.18G011000	Leucine-rich repeat protein kinase family protein	347	239	0.537925	0.85797	8.46e-13	2.32e-12	3.11e-13	TRUE
	DMI2-12	Glyma19g36211	Glyma.19G178400	Leucine-rich repeat protein kinase family protein	not expressed	not expressed	n/a	n/a	n/a	n/a	n/a	n/a
MK3-1-OE	DMI2-1	Glyma01g02451	Glyma.01G020100	Leucine-rich repeat protein kinase family protein	not expressed	not expressed	n/a	n/a	n/a	n/a	n/a	n/a
	DMI2-2	Glyma03g33480	Glyma.03G177600	Leucine-rich repeat protein kinase family protein	not expressed	not expressed	n/a	n/a	n/a	n/a	n/a	n/a
	DMI2-3	Glyma05g27650	Glyma.05G144400	Leucine-rich repeat protein kinase family protein	381	158	1.26987	1.63466	0	0	0	TRUE
	DMI2-4	Glyma08g10640	Glyma.08G100800	Leucine-rich repeat protein kinase family protein	459	253	0.859357	1.22415	0	0	0	TRUE
	DMI2-5	Glyma09g33510	Glyma.09G202300	Leucine-rich repeat protein kinase family protein	not expressed	not expressed
	DMI2-6	Glyma10g05600	Glyma.10G048800	Leucine-rich repeat protein kinase family protein	231	131	0.818326	1.18312	1.54e-14	4.86e-14	7.44e-15	TRUE
	DMI2-7	Glyma11g37500	Glyma.11G246200	Leucine-rich repeat protein kinase family protein	not expressed	not expressed	n/a	n/a	n/a	n/a	n/a	n/a
	DMI2-8	Glyma13g19960	Glyma.13G136700	Leucine-rich repeat protein kinase family protein	not expressed	not expressed	n/a	n/a	n/a	n/a	n/a	n/a
	DMI2-9	Glyma13g42941	Glyma.13G352900	Leucine-rich repeat protein kinase family protein	15	79	-2.396890153	-2.032093339	8.74e-09	2.18e-08	3.34e-09	TRUE
	DMI2-10	Glyma15g02450.	Glyma.15G021400	Leucine-rich repeat protein kinase family protein	60	788	-3.71516	-3.35036	0	0	0	TRUE
	DMI2-11	Glyma18g01450	Glyma.18G011000	Leucine-rich repeat protein kinase family protein	272	139	0.968522	1.33332	0	0	0	TRUE
	DMI2-12	Glyma19g36211	Glyma.19G178400	Leucine-rich repeat protein kinase family protein	not expressed	not expressed	n/a	n/a	n/a	n/a	n/a	n/a
MK3-2-OE	DMI2-1	Glyma01g02451	Glyma.01G020100	Leucine-rich repeat protein kinase family protein	not expressed	not expressed	n/a	n/a	n/a	n/a	n/a	n/a
	DMI2-2	Glyma03g33480	Glyma.03G177600	Leucine-rich repeat protein kinase family protein	not expressed	not expressed	n/a	n/a	n/a	n/a	n/a	n/a
	DMI2-3	Glyma05g27650	Glyma.05G144400	Leucine-rich repeat protein kinase family protein	420	91	2.20645	2.1971	0	0	0	TRUE
	DMI2-4	Glyma08g10640	Glyma.08G100800	Leucine-rich repeat protein kinase family protein	not expressed	not expressed	n/a	n/a	n/a	n/a	n/a	n/a
	DMI2-5	Glyma09g33510	Glyma.09G202300	Leucine-rich repeat protein kinase family protein	not expressed	not expressed	n/a	n/a	n/a	n/a	n/a	n/a
	DMI2-6	Glyma10g05600	Glyma.10G048800	Leucine-rich repeat protein kinase family protein	not expressed	not expressed	n/a	n/a	n/a	n/a	n/a	n/a
	DMI2-7	Glyma11g37500	Glyma.11G246200	Leucine-rich repeat protein kinase family protein	not expressed	not expressed	n/a	n/a	n/a	n/a	n/a	n/a
	DMI2-8	Glyma13g19960	Glyma.13G136700	Leucine-rich repeat protein kinase family protein	not expressed	not expressed	n/a	n/a	n/a	n/a	n/a	n/a
	DMI2-9	Glyma13g42941	Glyma.13G352900	Leucine-rich repeat protein kinase family protein	13	28	-1.106915204	-1.11627049	0.0168206	0.0255998	0.00586894	FALSE
	DMI2-10	Glyma15g02450.	Glyma.15G021400	Leucine-rich repeat protein kinase family protein	60	23	1.38333	1.37397	4.05e-05	8.25e-05	1.89e-05	TRUE
	DMI2-11	Glyma18g01450	Glyma.18G011000	Leucine-rich repeat protein kinase family protein	272	96	1.5025	1.49315	0	0	0	TRUE
	DMI2-12	Glyma19g36211	Glyma.19G178400	Leucine-rich repeat protein kinase family protein	337	123	1.45409	1.44473	0	0	0	TRUE
MK4-1-OE	DMI2-1	Glyma01g02451	Glyma.01G020100	Leucine-rich repeat protein kinase family protein	not expressed	not expressed	n/a	n/a	n/a	n/a	n/a	n/a
	DMI2-2	Glyma03g33480	Glyma.03G177600	Leucine-rich repeat protein kinase family protein	not expressed	not expressed	n/a	n/a	n/a	n/a	n/a	n/a
	DMI2-3	Glyma05g27650	Glyma.05G144400	Leucine-rich repeat protein kinase family protein	420	57	2.88136	3.09552	0	0	0	TRUE
	DMI2-4	Glyma08g10640	Glyma.08G100800	Leucine-rich repeat protein kinase family protein	459	139	1.72341	1.93758	0	0	0	TRUE
	DMI2-5	Glyma09g33510	Glyma.09G202300	Leucine-rich repeat protein kinase family protein	not expressed	not expressed	n/a	n/a	n/a	n/a	n/a	n/a
	DMI2-6	Glyma10g05600	Glyma.10G048800	Leucine-rich repeat protein kinase family protein	not expressed	not expressed	n/a	n/a	n/a	n/a	n/a	n/a
	DMI2-7	Glyma11g37500	Glyma.11G246200	Leucine-rich repeat protein kinase family protein	not expressed	not expressed	n/a	n/a	n/a	n/a	n/a	n/a
	DMI2-8	Glyma13g19960	Glyma.13G136700	Leucine-rich repeat protein kinase family protein	not expressed	not expressed	n/a	n/a	n/a	n/a	n/a	n/a
	DMI2-9	Glyma13g42941	Glyma.13G352900	Leucine-rich repeat protein kinase family protein	13	19	-0.547487795	-0.333321949	0.518373	0.564949	0.0808883	FALSE
	DMI2-10	Glyma15g02450.	Glyma.15G021400	Leucine-rich repeat protein kinase family protein	60	155	-1.36923	-1.15507	3.27e-08	7.91e-08	1.13e-08	TRUE
	DMI2-11	Glyma18g01450	Glyma.18G011000	Leucine-rich repeat protein kinase family protein	347	130	1.41642	1.63059	0	0	0	TRUE
	DMI2-12	Glyma19g36211	Glyma.19G178400	Leucine-rich repeat protein kinase family protein	345	192	0.84549	1.05966	1.11e-16	3.83e-16	5.45e-17	TRUE
MK5-3-OE	DMI2-1	Glyma01g02451	Glyma.01G020100	Leucine-rich repeat protein kinase family protein	not expressed	not expressed	n/a	n/a	n/a	n/a	n/a	n/a
	DMI2-2	Glyma03g33480	Glyma.03G177600	Leucine-rich repeat protein kinase family protein	not expressed	not expressed	n/a	n/a	n/a	n/a	n/a	n/a
	DMI2-3	Glyma05g27650	Glyma.05G144400	Leucine-rich repeat protein kinase family protein	381	132	1.52925	1.70092	0	0	0	TRUE
	DMI2-4	Glyma08g10640	Glyma.08G100800	Leucine-rich repeat protein kinase family protein	not expressed	not expressed	n/a	n/a	n/a	n/a	n/a	n/a
	DMI2-5	Glyma09g33510	Glyma.09G202300	Leucine-rich repeat protein kinase family protein	not expressed	not expressed	n/a	n/a	n/a	n/a	n/a	n/a
	DMI2-6	Glyma10g05600	Glyma.10G048800	Leucine-rich repeat protein kinase family protein	not expressed	not expressed	n/a	n/a	n/a	n/a	n/a	n/a
	DMI2-7	Glyma11g37500	Glyma.11G246200	Leucine-rich repeat protein kinase family protein	not expressed	not expressed	n/a	n/a	n/a	n/a	n/a	n/a
	DMI2-8	Glyma13g19960	Glyma.13G136700	Leucine-rich repeat protein kinase family protein	not expressed	not expressed	n/a	n/a	n/a	n/a	n/a	n/a
	DMI2-9	Glyma13g42941	Glyma.13G352900	Leucine-rich repeat protein kinase family protein	13	35	-1.428843299	-1.257178965	0.00462143	0.0069297	0.000966432	FALSE
	DMI2-10	Glyma15g02450.	Glyma.15G021400	Leucine-rich repeat protein kinase family protein	60	451	-2.91009	-2.73843	0	0	0	TRUE
	DMI2-11	Glyma18g01450	Glyma.18G011000	Leucine-rich repeat protein kinase family protein	not expressed	not expressed	n/a	n/a	n/a	n/a	n/a	n/a
	DMI2-12	Glyma19g36211	Glyma.19G178400	Leucine-rich repeat protein kinase family protein	not expressed	not expressed	n/a	n/a	n/a	n/a	n/a	n/a
MK6-2-OE	DMI2-1	Glyma01g02451	Glyma.01G020100	Leucine-rich repeat protein kinase family protein	not expressed	not expressed	n/a	n/a	n/a	n/a	n/a	n/a
	DMI2-2	Glyma03g33480	Glyma.03G177600	Leucine-rich repeat protein kinase family protein	not expressed	not expressed	n/a	n/a	n/a	n/a	n/a	n/a
	DMI2-3	Glyma05g27650	Glyma.05G144400	Leucine-rich repeat protein kinase family protein	not expressed	not expressed	n/a	n/a	n/a	n/a	n/a	n/a
	DMI2-4	Glyma08g10640	Glyma.08G100800	Leucine-rich repeat protein kinase family protein	not expressed	not expressed	n/a	n/a	n/a	n/a	n/a	n/a
	DMI2-5	Glyma09g33510	Glyma.09G202300	Leucine-rich repeat protein kinase family protein	not expressed	not expressed	n/a	n/a	n/a	n/a	n/a	n/a
	DMI2-6	Glyma10g05600	Glyma.10G048800	Leucine-rich repeat protein kinase family protein	not expressed	not expressed	n/a	n/a	n/a	n/a	n/a	n/a
	DMI2-7	Glyma11g37500	Glyma.11G246200	Leucine-rich repeat protein kinase family protein	not expressed	not expressed	n/a	n/a	n/a	n/a	n/a	n/a
	DMI2-8	Glyma13g19960	Glyma.13G136700	Leucine-rich repeat protein kinase family protein	not expressed	not expressed	n/a	n/a	n/a	n/a	n/a	n/a
	DMI2-9	Glyma13g42941	Glyma.13G352900	Leucine-rich repeat protein kinase family protein	13	17	-0.387023123	-0.350177643	0.508254	0.55474	0.11568	FALSE
	DMI2-10	Glyma15g02450.	Glyma.15G021400	Leucine-rich repeat protein kinase family protein	60	12	2.32193	2.35877	1.81e-09	4.47e-09	9.32e-10	TRUE
	DMI2-11	Glyma18g01450	Glyma.18G011000	Leucine-rich repeat protein kinase family protein	not expressed	not expressed	n/a	n/a	n/a	n/a	n/a	n/a
	DMI2-12	Glyma19g36211	Glyma.19G178400	Leucine-rich repeat protein kinase family protein	not expressed	not expressed	n/a	n/a	n/a	n/a	n/a	n/a
MK13-1-OE	DMI2-1	Glyma01g02451	Glyma.01G020100	Leucine-rich repeat protein kinase family protein	not expressed	not expressed	n/a	n/a	n/a	n/a	n/a	n/a
	DMI2-2	Glyma03g33480	Glyma.03G177600	Leucine-rich repeat protein kinase family protein	not expressed	not expressed	n/a	n/a	n/a	n/a	n/a	n/a
	DMI2-3	Glyma05g27650	Glyma.05G144400	Leucine-rich repeat protein kinase family protein	381	190	1.00379	1.02252	2.22e-16	8.44e-16	2.23e-16	TRUE
	DMI2-4	Glyma08g10640	Glyma.08G100800	Leucine-rich repeat protein kinase family protein	not expressed	not expressed	n/a	n/a	n/a	n/a	n/a	n/a
	DMI2-5	Glyma09g33510	Glyma.09G202300	Leucine-rich repeat protein kinase family protein	not expressed	not expressed	n/a	n/a	n/a	n/a	n/a	n/a
	DMI2-6	Glyma10g05600	Glyma.10G048800	Leucine-rich repeat protein kinase family protein	not expressed	not expressed	n/a	n/a	n/a	n/a	n/a	n/a
	DMI2-7	Glyma11g37500	Glyma.11G246200	Leucine-rich repeat protein kinase family protein	not expressed	not expressed	n/a	n/a	n/a	n/a	n/a	n/a
	DMI2-8	Glyma13g19960	Glyma.13G136700	Leucine-rich repeat protein kinase family protein	not expressed	not expressed	n/a	n/a	n/a	n/a	n/a	n/a
	DMI2-9	Glyma13g42941	Glyma.13G352900	Leucine-rich repeat protein kinase family protein	15	48	-1.678071905	-1.659346672	2.52E-05	5.48E-05	1.45E-05	TRUE
	DMI2-10	Glyma15g02450.	Glyma.15G021400	Leucine-rich repeat protein kinase family protein	60	596	-3.31228	-3.29355	0	0	0	TRUE
	DMI2-11	Glyma18g01450	Glyma.18G011000	Leucine-rich repeat protein kinase family protein	not expressed	not expressed	n/a	n/a	n/a	n/a	n/a	n/a
	DMI2-12	Glyma19g36211	Glyma.19G178400	Leucine-rich repeat protein kinase family protein	not expressed	not expressed	n/a	n/a	n/a	n/a	n/a	n/a
MK16-4-OE	DMI2-1	Glyma01g02451	Glyma.01G020100	Leucine-rich repeat protein kinase family protein	not expressed	not expressed	n/a	n/a	n/a	n/a	n/a	n/a
	DMI2-2	Glyma03g33480	Glyma.03G177600	Leucine-rich repeat protein kinase family protein	not expressed	not expressed	n/a	n/a	n/a	n/a	n/a	n/a
	DMI2-3	Glyma05g27650	Glyma.05G144400	Leucine-rich repeat protein kinase family protein	not expressed	not expressed	n/a	n/a	n/a	n/a	n/a	n/a
	DMI2-4	Glyma08g10640	Glyma.08G100800	Leucine-rich repeat protein kinase family protein	not expressed	not expressed	n/a	n/a	n/a	n/a	n/a	n/a
	DMI2-5	Glyma09g33510	Glyma.09G202300	Leucine-rich repeat protein kinase family protein	not expressed	not expressed	n/a	n/a	n/a	n/a	n/a	n/a
	DMI2-6	Glyma10g05600	Glyma.10G048800	Leucine-rich repeat protein kinase family protein	not expressed	not expressed	n/a	n/a	n/a	n/a	n/a	n/a
	DMI2-7	Glyma11g37500	Glyma.11G246200	Leucine-rich repeat protein kinase family protein	286	143	1	1.1583	5.55e-16	2.49e-15	5.14e-16	TRUE
	DMI2-8	Glyma13g19960	Glyma.13G136700	Leucine-rich repeat protein kinase family protein	not expressed	not expressed	n/a	n/a	n/a	n/a	n/a	n/a
	DMI2-9	Glyma13g42941	Glyma.13G352900	Leucine-rich repeat protein kinase family protein	15	248	-4.047305715	-3.889001481	0	0	0	TRUE
	DMI2-10	Glyma15g02450.	Glyma.15G021400	Leucine-rich repeat protein kinase family protein	60	309	-2.36457	-2.20627	0	0	0	TRUE
	DMI2-11	Glyma18g01450	Glyma.18G011000	Leucine-rich repeat protein kinase family protein	not expressed	not expressed	n/a	n/a	n/a	n/a	n/a	n/a
	DMI2-12	Glyma19g36211	Glyma.19G178400	Leucine-rich repeat protein kinase family protein	not expressed	not expressed	n/a	n/a	n/a	n/a	n/a	n/a
MK20-2-OE	DMI2-1	Glyma01g02451	Glyma.01G020100	Leucine-rich repeat protein kinase family protein	not expressed	not expressed	n/a	n/a	n/a	n/a	n/a	n/a
	DMI2-2	Glyma03g33480	Glyma.03G177600	Leucine-rich repeat protein kinase family protein	not expressed	not expressed	n/a	n/a	n/a	n/a	n/a	n/a
	DMI2-3	Glyma05g27650	Glyma.05G144400	Leucine-rich repeat protein kinase family protein	420	127	1.72556	1.88407	0	0	0	TRUE
	DMI2-4	Glyma08g10640	Glyma.08G100800	Leucine-rich repeat protein kinase family protein	not expressed	not expressed	n/a	n/a	n/a	n/a	n/a	n/a
	DMI2-5	Glyma09g33510	Glyma.09G202300	Leucine-rich repeat protein kinase family protein	not expressed	not expressed	n/a	n/a	n/a	n/a	n/a	n/a
	DMI2-6	Glyma10g05600	Glyma.10G048800	Leucine-rich repeat protein kinase family protein	not expressed	not expressed	n/a	n/a	n/a	n/a	n/a	n/a
	DMI2-7	Glyma11g37500	Glyma.11G246200	Leucine-rich repeat protein kinase family protein	272	125	1.12168	1.28019	0	0	0	TRUE
	DMI2-8	Glyma13g19960	Glyma.13G136700	Leucine-rich repeat protein kinase family protein	not expressed	not expressed	n/a	n/a	n/a	n/a	n/a	n/a
	DMI2-9	Glyma13g42941	Glyma.13G352900	Leucine-rich repeat protein kinase family protein	not expressed	not expressed	n/a	n/a	n/a	n/a	n/a	n/a
	DMI2-10	Glyma15g02450.	Glyma.15G021400	Leucine-rich repeat protein kinase family protein	not expressed	not expressed	n/a	n/a	n/a	n/a	n/a	n/a
	DMI2-11	Glyma18g01450	Glyma.18G011000	Leucine-rich repeat protein kinase family protein	272	132	1.04307	1.20158	4.44e-16	1.5e-15	2.39e-16	TRUE
	DMI2-12	Glyma19g36211	Glyma.19G178400	Leucine-rich repeat protein kinase family protein	not expressed	not expressed	n/a	n/a	n/a	n/a	n/a	n/a
DMI3
Sample	Gene name	Accession 1 (2010)	Accession 2 (2015)	Description	value1	value2	log2(Fold_change)	log2(Fold_change) normalized	p-value	q-value(Benjamini et al. 1995)	q-value(Storey et al. 2003)	Signature(p-value < 0.001)
MK2-OE	DMI3-1	Glyma08g24361	Glyma.08G227200	calmodulin-domain protein kinase cdpk isoform 2	1707	1880	-0.13927	0.180775	0.000181861	0.000323364	4.34e-05	TRUE
	DMI3-2	Glyma15g35070	Glyma.15G222300	calmodulin-domain protein kinase cdpk isoform 2	154412	2844	5.76272	6.08276	0	0	0	TRUE
MK3-1-OE	DMI3-1	Glyma08g24361	Glyma.08G227200	calmodulin-domain protein kinase cdpk isoform 2	not expressed	not expressed	n/a	n/a	n/a	n/a	n/a	n/a
	DMI3-2	Glyma15g35070	Glyma.15G222300	calmodulin-domain protein kinase cdpk isoform 2	154412	45379	1.76669	2.13148	0	0	0	TRUE
MK3-2-OE	DMI3-1	Glyma08g24361	Glyma.08G227200	calmodulin-domain protein kinase cdpk isoform 2	not expressed	not expressed	n/a	n/a	n/a	n/a	n/a	n/a
	DMI3-2	Glyma15g35070	Glyma.15G222300	calmodulin-domain protein kinase cdpk isoform 2	not expressed	not expressed	n/a	n/a	n/a	n/a	n/a	n/a
MK4-1-OE	DMI3-1	Glyma08g24361	Glyma.08G227200	calmodulin-domain protein kinase cdpk isoform 2	1707	761	1.16549	1.37966	0	0	0	TRUE
	DMI3-2	Glyma15g35070	Glyma.15G222300	calmodulin-domain protein kinase cdpk isoform 2	not expressed	not expressed	n/a	n/a	n/a	n/a	n/a	n/a
MK5-3-OE	DMI3-1	Glyma08g24361	Glyma.08G227200	calmodulin-domain protein kinase cdpk isoform 2	not expressed	not expressed	n/a	n/a	n/a	n/a	n/a	n/a
	DMI3-2	Glyma15g35070	Glyma.15G222300	calmodulin-domain protein kinase cdpk isoform 2	154412	57308	1.42998	1.60164	0	0	0	TRUE
MK6-2-OE	DMI3-1	Glyma08g24361	Glyma.08G227200	calmodulin-domain protein kinase cdpk isoform 2	not expressed	not expressed	n/a	n/a	n/a	n/a	n/a	n/a
	DMI3-2	Glyma15g35070	Glyma.15G222300	calmodulin-domain protein kinase cdpk isoform 2	not expressed	not expressed	n/a	n/a	n/a	n/a	n/a	n/a
MK13-1-OE	DMI3-1	Glyma08g24361	Glyma.08G227200	calmodulin-domain protein kinase cdpk isoform 2	not expressed	not expressed	n/a	n/a	n/a	n/a	n/a	n/a
	DMI3-2	Glyma15g35070	Glyma.15G222300	calmodulin-domain protein kinase cdpk isoform 2	not expressed	not expressed	n/a	n/a	n/a	n/a	n/a	n/a
MK16-4-OE	DMI3-1	Glyma08g24361	Glyma.08G227200	calmodulin-domain protein kinase cdpk isoform 2	not expressed	not expressed	n/a	n/a	n/a	n/a	n/a	n/a
	DMI3-2	Glyma15g35070	Glyma.15G222300	calmodulin-domain protein kinase cdpk isoform 2	not expressed	not expressed	n/a	n/a	n/a	n/a	n/a	n/a
MK20-2-OE	DMI3-1	Glyma08g24361	Glyma.08G227200	calmodulin-domain protein kinase cdpk isoform 2	not expressed	not expressed	n/a	n/a	n/a	n/a	n/a	n/a
	DMI3-2	Glyma15g35070	Glyma.15G222300	calmodulin-domain protein kinase cdpk isoform 2	154412	72343	1.09386	1.25237	0	0	0	TRUE
