# Supplementary material for: Glycine max Homologs of DOESN'T MAKE INFECTIONS 1, 2, and 3 Function to Impair Heterodera glycines Parasitism While Also Regulating Mitogen Activated Protein Kinase Expression
Source: Front Plant Sci. 2022 May 4;13:842597. doi: 10.3389/fpls.2022.842597 (PMC9114929; doi:10.3389/fpls.2022.842597)
Supplement: Supplementary Table 8 — DMI gene expression in defense MAPK-RNA interference (MAPK-RNAi) root RNA as compared to the pRAP17-ccdB control root RNA. RNA-seq data whose differential expression was calculated as an RTA has been presented as FC; obtained from Alshehri et al. (2019) (p < 0.001) (Wang and Wang, 2021). Please refer to Materials and Methods subsection: RNA-seq gene expression analyses of transgenic MAPK-OE and -RNAi root RNA, for details. [file Table_8.xlsx]

## Sheet: MK RNAi
DMI1															DMI2-1	DMI3-1
MK-RNAi Sample	Gene name	Accession 1 (2010)	Accession 2 (2015)	Description	value1	value2	log2(Fold_change)	log2(Fold_change) normalized	p-value	q-value(Benjamini et al. 1995)	q-value(Storey et al. 2003)	Signature(p-value < 0.001)			DMI2-2	DMI3-2
MK2-RNAi	DMI1-1	Glyma12g28860	Glyma.12G167300	PTHR31563:SF1 - ION CHANNEL POLLUX-RELATED	345	716	-1.05336	-0.792398	0	0	0	TRUE			DMI2-3	DMI3-1
	DMI1-2	Glyma16g00500	Glyma.16G003300	PTHR31563:SF1 - ION CHANNEL POLLUX-RELATED	not expressed	not expressed	n/a	n/a	n/a	n/a	n/a	n/a			DMI2-4	DMI3-2
	DMI1-3	Glyma19g45310	Glyma.19G263500	PF06241 - Castor and Pollux	965	1760	-0.866975	-0.606009	0	0	0	TRUE			DMI2-5	DMI3-1
MK3-1-RNAi	DMI1-1	Glyma12g28860	Glyma.12G167300	PTHR31563:SF1 - ION CHANNEL POLLUX-RELATED	not expressed	not expressed	n/a	n/a	n/a	n/a	n/a	n/a			DMI2-6	DMI3-2
	DMI1-2	Glyma16g00500	Glyma.16G003300	PTHR31563:SF1 - ION CHANNEL POLLUX-RELATED	not expressed	not expressed	n/a	n/a	n/a	n/a	n/a	n/a			DMI2-7	DMI3-1
	DMI1-3	Glyma19g45310	Glyma.19G263500	PF06241 - Castor and Pollux	965	1470	-0.607215	-0.258663	1.35e-05	4.6e-05	1.26e-05	TRUE			DMI2-8	DMI3-2
MK3-2-RNAi	DMI1-1	Glyma12g28860	Glyma.12G167300	PTHR31563:SF1 - ION CHANNEL POLLUX-RELATED	not expressed	not expressed	n/a	n/a	n/a	n/a	n/a	n/a			DMI2-9	DMI3-1
	DMI1-2	Glyma16g00500	Glyma.16G003300	PTHR31563:SF1 - ION CHANNEL POLLUX-RELATED	not expressed	not expressed	n/a	n/a	n/a	n/a	n/a	n/a			DMI2-10	DMI3-2
	DMI1-3	Glyma19g45310	Glyma.19G263500	PF06241 - Castor and Pollux	965	880	0.133025	0.33078	8.56e-07	1.84e-06	2.77e-07	TRUE			DMI2-11	DMI3-1
MK4-1-RNAi	DMI1-1	Glyma12g28860	Glyma.12G167300	PTHR31563:SF1 - ION CHANNEL POLLUX-RELATED	345	1210	-1.81034	-1.52183	0	0	0	TRUE			DMI2-12	DMI3-2
	DMI1-2	Glyma16g00500	Glyma.16G003300	PTHR31563:SF1 - ION CHANNEL POLLUX-RELATED	250	1051	-2.07176	-1.78325	0	0	0	TRUE			DMI2-1	DMI3-1
	DMI1-3	Glyma19g45310	Glyma.19G263500	PF06241 - Castor and Pollux	965	1845	-0.93502	-0.646506	0	0	0	TRUE			DMI2-2	DMI3-2
MK5-3-RNAi	DMI1-1	Glyma12g28860	Glyma.12G167300	PTHR31563:SF1 - ION CHANNEL POLLUX-RELATED	345	846	-1.29406	-1.47165	0	0	0	TRUE			DMI2-3	DMI3-1
	DMI1-2	Glyma16g00500	Glyma.16G003300	PTHR31563:SF1 - ION CHANNEL POLLUX-RELATED	250	397	-0.667211	-0.844799	1.78e-13	5.1e-13	8.35e-14	TRUE			DMI2-4	DMI3-2
	DMI1-3	Glyma19g45310	Glyma.19G263500	PF06241 - Castor and Pollux	965	623	0.631297	0.453708	6.56e-10	1.64e-09	2.68e-10	TRUE			DMI2-5	DMI3-1
MK6-2-RNAi	DMI1-1	Glyma12g28860	Glyma.12G167300	PTHR31563:SF1 - ION CHANNEL POLLUX-RELATED	345	720	-1.0614	-0.535167	7.65e-09	2.4e-08	4.27e-09	TRUE			DMI2-6	DMI3-2
	DMI1-2	Glyma16g00500	Glyma.16G003300	PTHR31563:SF1 - ION CHANNEL POLLUX-RELATED	not expressed	not expressed	n/a	n/a	n/a	n/a	n/a	n/a			DMI2-7
	DMI1-3	Glyma19g45310	Glyma.19G263500	PF06241 - Castor and Pollux	not expressed	not expressed	n/a	n/a	n/a	n/a	n/a	n/a			DMI2-8
MK13-1-RNAi	DMI1-1	Glyma12g28860	Glyma.12G167300	PTHR31563:SF1 - ION CHANNEL POLLUX-RELATED	345	803	-1.2188	-0.483766	1.06e-07	2.36e-07	3.56e-08	TRUE			DMI2-9
	DMI1-2	Glyma16g00500	Glyma.16G003300	PTHR31563:SF1 - ION CHANNEL POLLUX-RELATED	250	581	-1.21661	-0.481572	6.68e-06	1.35e-05	2.03e-06	TRUE			DMI2-10
	DMI1-3	Glyma19g45310	Glyma.19G263500	PF06241 - Castor and Pollux	965	810	0.252607	0.987645	0	0	0	TRUE			DMI2-11
MK16-4-RNAi	DMI1-1	Glyma12g28860	Glyma.12G167300	PTHR31563:SF1 - ION CHANNEL POLLUX-RELATED	345	988	-1.51791	-1.3375	0	0	0	TRUE			DMI2-12
	DMI1-2	Glyma16g00500	Glyma.16G003300	PTHR31563:SF1 - ION CHANNEL POLLUX-RELATED	250	434	-0.795767	-0.61535	4.85e-08	1.1e-07	1.69e-08	TRUE			DMI2-1
	DMI1-3	Glyma19g45310	Glyma.19G263500	PF06241 - Castor and Pollux	not expressed	not expressed	n/a	n/a	n/a	n/a	n/a	n/a			DMI2-2
MK20-2-RNAi	DMI1-1	Glyma12g28860	Glyma.12G167300	PTHR31563:SF1 - ION CHANNEL POLLUX-RELATED	345	866	-1.32777	-1.20547	0	0	0	TRUE			DMI2-3
	DMI1-2	Glyma16g00500	Glyma.16G003300	PTHR31563:SF1 - ION CHANNEL POLLUX-RELATED	186	553	-1.57198	-1.44968	0	0	0	TRUE			DMI2-4
	DMI1-3	Glyma19g45310	Glyma.19G263500	PF06241 - Castor and Pollux	965	718	0.426545	0.548846	7.99e-15	2.44e-14	4.13e-15	TRUE	27		DMI2-5
DMI2													108		DMI2-6
													18		DMI2-7
Sample	Gene name	Accession 1 (2010)	Accession 2 (2015)										153		DMI2-8
MK2-RNAi	DMI2-1	Glyma01g02451	Glyma.01G020100	Leucine-rich repeat protein kinase family protein	3441	10970	-1.67266	-1.4117	0	0	0	TRUE			DMI2-9
	DMI2-2	Glyma03g33480	Glyma.03G177600	Leucine-rich repeat protein kinase family protein	487	1563	-1.68232	-1.42136	0	0	0	TRUE			DMI2-10
	DMI2-3	Glyma05g27650	Glyma.05G144400	Leucine-rich repeat protein kinase family protein	41	293	-2.8372	-2.57624	0	0	0	TRUE			DMI2-11
	DMI2-4	Glyma08g10640	Glyma.08G100800	Leucine-rich repeat protein kinase family protein	97	462	-2.25184	-1.99087	0	0	0	TRUE			DMI2-12
	DMI2-5	Glyma09g33510	Glyma.09G202300	Leucine-rich repeat protein kinase family protein	4016	10298	-1.35853	-1.09757	0	0	0	TRUE			DMI2-1
	DMI2-6	Glyma10g05600	Glyma.10G048800	Leucine-rich repeat protein kinase family protein	not expressed	not expressed	n/a	n/a	n/a	n/a	n/a	n/a			DMI2-2
	DMI2-7	Glyma11g37500	Glyma.11G246200	Leucine-rich repeat protein kinase family protein	93	476	-2.35566	-2.09469	0	0	0	TRUE			DMI2-3
	DMI2-8	Glyma13g19960	Glyma.13G136700	Leucine-rich repeat protein kinase family protein	not expressed	not expressed	n/a	n/a	n/a	n/a	n/a	n/a			DMI2-4
	DMI2-9	Glyma13g42941	Glyma.13G352900	Leucine-rich repeat transmembrane protein kinase protein	not expressed	not expressed	n/a	n/a	n/a	n/a	n/a	n/a			DMI2-5
	DMI2-10	Glyma15g02450	Glyma.15G021400	Leucine-rich repeat transmembrane protein kinase protein	not expressed	not expressed	n/a	n/a	n/a	n/a	n/a	n/a			DMI2-6
	DMI2-11	Glyma18g01450	Glyma.18G011000	Leucine-rich repeat protein kinase family protein	78	320	-2.03653	-1.77556	0	0	0	TRUE			DMI2-7
	DMI2-12	Glyma19g36211	Glyma.19G178400	Leucine-rich repeat protein kinase family protein	148	321	-1.11698	-0.856011	7.51e-10	2.46e-09	4.27e-10	TRUE			DMI2-8
MK3-1-RNAi	DMI2-1	Glyma01g02451	Glyma.01G020100	Leucine-rich repeat protein kinase family protein	3441	6462	-0.909153	-0.560601	0	0	0	TRUE			DMI2-9
	DMI2-2	Glyma03g33480	Glyma.03G177600	Leucine-rich repeat protein kinase family protein	not expressed	not expressed	n/a	n/a	n/a	n/a	n/a	n/a			DMI2-10
	DMI2-3	Glyma05g27650	Glyma.05G144400	Leucine-rich repeat protein kinase family protein	41	132	-1.68684	-1.33829	2.72e-08	1.21e-07	3.3e-08	TRUE			DMI2-11
	DMI2-4	Glyma08g10640	Glyma.08G100800	Leucine-rich repeat protein kinase family protein	97	298	-1.61926	-1.2707	9.99e-16	7.01e-15	1.91e-15	TRUE			DMI2-12
	DMI2-5	Glyma09g33510	Glyma.09G202300	Leucine-rich repeat protein kinase family protein	4016	8013	-0.996583	-0.648031	0	0	0	TRUE			DMI2-1
	DMI2-6	Glyma10g05600	Glyma.10G048800	Leucine-rich repeat protein kinase family protein	143	272	-0.927592	-0.579039	7.64e-05	0.000235729	6.43e-05	TRUE			DMI2-2
	DMI2-7	Glyma11g37500	Glyma.11G246200	Leucine-rich repeat protein kinase family protein	not expressed	not expressed	n/a	n/a	n/a	n/a	n/a	n/a			DMI2-3
	DMI2-8	Glyma13g19960	Glyma.13G136700	Leucine-rich repeat protein kinase family protein	not expressed	not expressed	n/a	n/a	n/a	n/a	n/a	n/a			DMI2-4
	DMI2-9	Glyma13g42941	Glyma.13G352900	Leucine-rich repeat transmembrane protein kinase protein	20	113	-2.49825	-2.1497	8.21e-13	4.97e-12	1.36e-12	TRUE			DMI2-5
	DMI2-10	Glyma15g02450	Glyma.15G021400	Leucine-rich repeat transmembrane protein kinase protein	180	511	-1.50533	-1.15677	0	0	0	TRUE			DMI2-6
	DMI2-11	Glyma18g01450	Glyma.18G011000	Leucine-rich repeat protein kinase family protein	80	196	-1.29278	-0.944229	2.93e-07	1.19e-06	3.25e-07	TRUE			DMI2-7
	DMI2-12	Glyma19g36211	Glyma.19G178400	Leucine-rich repeat protein kinase family protein	120	238	-0.987927	-0.639375	5.31e-05	0.000167629	4.57e-05	TRUE			DMI2-8
MK3-2-RNAi	DMI2-1	Glyma01g02451	Glyma.01G020100	Leucine-rich repeat protein kinase family protein	3441	8382	-1.28447	-1.08671	0	0	0	TRUE			DMI2-9
	DMI2-2	Glyma03g33480	Glyma.03G177600	Leucine-rich repeat protein kinase family protein	not expressed	not expressed	n/a	n/a	n/a	n/a	n/a	n/a			DMI2-10
	DMI2-3	Glyma05g27650	Glyma.05G144400	Leucine-rich repeat protein kinase family protein	41	373	-3.18548	-2.98772	0	0	0	TRUE			DMI2-11
	DMI2-4	Glyma08g10640	Glyma.08G100800	Leucine-rich repeat protein kinase family protein	82	201	-1.2935	-1.09574	1.42e-09	3.53e-09	5.33e-10	TRUE			DMI2-12
	DMI2-5	Glyma09g33510	Glyma.09G202300	Leucine-rich repeat protein kinase family protein	4016	9916	-1.304	-1.10624	0	0	0	TRUE			DMI2-1
	DMI2-6	Glyma10g05600	Glyma.10G048800	Leucine-rich repeat protein kinase family protein	not expressed	not expressed	n/a	n/a	n/a	n/a	n/a	n/a			DMI2-2
	DMI2-7	Glyma11g37500	Glyma.11G246200	Leucine-rich repeat protein kinase family protein	100	228	-1.18903	-0.991279	2.83e-09	6.96e-09	1.05e-09	TRUE			DMI2-3
	DMI2-8	Glyma13g19960	Glyma.13G136700	Leucine-rich repeat protein kinase family protein	not expressed	not expressed	n/a	n/a	n/a	n/a	n/a	n/a			DMI2-4
	DMI2-9	Glyma13g42941	Glyma.13G352900	Leucine-rich repeat transmembrane protein kinase protein	30	258	-3.10434	-2.90658	0	0	0	TRUE			DMI2-5
	DMI2-10	Glyma15g02450	Glyma.15G021400	Leucine-rich repeat transmembrane protein kinase protein	180	2798	-3.95833	-3.76057	0	0	0	TRUE			DMI2-6
	DMI2-11	Glyma18g01450	Glyma.18G011000	Leucine-rich repeat protein kinase family protein	80	182	-1.18587	-0.988112	1.2e-07	2.71e-07	4.09e-08	TRUE			DMI2-7
	DMI2-12	Glyma19g36211	Glyma.19G178400	Leucine-rich repeat protein kinase family protein	not expressed	not expressed	n/a	n/a	n/a	n/a	n/a	n/a			DMI2-8
MK4-1-RNAi	DMI2-1	Glyma01g02451	Glyma.01G020100	Leucine-rich repeat protein kinase family protein	3441	11006	-1.67739	-1.38888	0	0	0	TRUE			DMI2-9
	DMI2-2	Glyma03g33480	Glyma.03G177600	Leucine-rich repeat protein kinase family protein	487	1077	-1.14502	-0.856511	0	0	0	TRUE			DMI2-10
	DMI2-3	Glyma05g27650	Glyma.05G144400	Leucine-rich repeat protein kinase family protein	41	864	-4.39734	-8.21764	0	0	0	TRUE			DMI2-11
	DMI2-4	Glyma08g10640	Glyma.08G100800	Leucine-rich repeat protein kinase family protein	97	898	-3.21066	-5.84429	0	0	0	TRUE			DMI2-12
	DMI2-5	Glyma09g33510	Glyma.09G202300	Leucine-rich repeat protein kinase family protein	4016	13144	-1.71057	-1.42206	0	0	0	TRUE			DMI2-1
	DMI2-6	Glyma10g05600	Glyma.10G048800	Leucine-rich repeat protein kinase family protein	143	394	-1.46218	-1.17367	0	0	0	TRUE			DMI2-2
	DMI2-7	Glyma11g37500	Glyma.11G246200	Leucine-rich repeat protein kinase family protein	100	341	-1.76977	-1.48126	0	0	0	TRUE			DMI2-3
	DMI2-8	Glyma13g19960	Glyma.13G136700	Leucine-rich repeat protein kinase family protein	34	209	-2.6199	-2.33138	0	0	0	TRUE			DMI2-4
	DMI2-9	Glyma13g42941	Glyma.13G352900	Leucine-rich repeat transmembrane protein kinase protein	20	213	-3.41278	-3.12427	0	0	0	TRUE			DMI2-5
	DMI2-10	Glyma15g02450	Glyma.15G021400	Leucine-rich repeat transmembrane protein kinase protein	180	4077	-4.50144	-4.21293	0	0	0	TRUE			DMI2-6
	DMI2-11	Glyma18g01450	Glyma.18G011000	Leucine-rich repeat protein kinase family protein	80	512	-2.67807	-4.77912	0	0	0	TRUE			DMI2-7
	DMI2-12	Glyma19g36211	Glyma.19G178400	Leucine-rich repeat protein kinase family protein	120	518	-2.10992	-1.8214	0	0	0	TRUE			DMI2-8
MK5-3-RNAi	DMI2-1	Glyma01g02451	Glyma.01G020100	Leucine-rich repeat protein kinase family protein	3441	4070	-0.242201	-0.419789	0	0	0	TRUE			DMI2-9
	DMI2-2	Glyma03g33480	Glyma.03G177600	Leucine-rich repeat protein kinase family protein	487	1169	-1.26328	-1.44087	0	0	0	TRUE			DMI2-10
	DMI2-3	Glyma05g27650	Glyma.05G144400	Leucine-rich repeat protein kinase family protein	33	191	-2.53303	-5.42125	0	0	0	TRUE			DMI2-11
	DMI2-4	Glyma08g10640	Glyma.08G100800	Leucine-rich repeat protein kinase family protein	82	235	-1.51896	-1.69655	0	0	0	TRUE			DMI2-12
	DMI2-5	Glyma09g33510	Glyma.09G202300	Leucine-rich repeat protein kinase family protein	4016	4033	-0.00609414	-0.183682	1.13e-08	2.66e-08	4.36e-09	TRUE			DMI2-1
	DMI2-6	Glyma10g05600	Glyma.10G048800	Leucine-rich repeat protein kinase family protein	143	244	-0.770866	-0.948454	1.9e-10	4.86e-10	7.96e-11	TRUE			DMI2-2
	DMI2-7	Glyma11g37500	Glyma.11G246200	Leucine-rich repeat protein kinase family protein	53	117	-1.14244	-1.32003	8.23e-09	1.95e-08	3.19e-09	TRUE			DMI2-3
	DMI2-8	Glyma13g19960	Glyma.13G136700	Leucine-rich repeat protein kinase family protein	37	289	-2.96547	-3.14306	0	0	0	TRUE			DMI2-4
	DMI2-9	Glyma13g42941	Glyma.13G352900	Leucine-rich repeat transmembrane protein kinase protein	20	52	-1.37851	-1.5561	1.35e-05	2.65e-05	4.34e-06	TRUE			DMI2-5
	DMI2-10	Glyma15g02450	Glyma.15G021400	Leucine-rich repeat transmembrane protein kinase protein	180	80	1.16993	0.992337	1.13e-07	2.52e-07	4.13e-08	TRUE			DMI2-6
	DMI2-11	Glyma18g01450	Glyma.18G011000	Leucine-rich repeat protein kinase family protein	80	458	-2.51728	-2.69486	0	0	0	TRUE			DMI2-7
	DMI2-12	Glyma19g36211	Glyma.19G178400	Leucine-rich repeat protein kinase family protein	120	509	-2.08463	-2.26222	0	0	0	TRUE			DMI2-8
MK6-2-RNAi	DMI2-1	Glyma01g02451	Glyma.01G020100	Leucine-rich repeat protein kinase family protein	3441	4198	-0.286874	0.239359	6.43e-13	2.56e-12	4.55e-13	TRUE			DMI2-9
	DMI2-2	Glyma03g33480	Glyma.03G177600	Leucine-rich repeat protein kinase family protein	487	533	-0.130214	0.39602	1.28e-05	3.13e-05	5.55e-06	TRUE			DMI2-10
	DMI2-3	Glyma05g27650	Glyma.05G144400	Leucine-rich repeat protein kinase family protein	41	379	-3.2085	-2.68227	0	0	0	TRUE			DMI2-11
	DMI2-4	Glyma08g10640	Glyma.08G100800	Leucine-rich repeat protein kinase family protein	82	232	-1.50043	-0.974195	3.63e-08	1.09e-07	1.93e-08	TRUE			DMI2-12
	DMI2-5	Glyma09g33510	Glyma.09G202300	Leucine-rich repeat protein kinase family protein	4016	4890	-0.284075	0.242158	4e-15	1.76e-14	3.12e-15	TRUE			DMI2-1
	DMI2-6	Glyma10g05600	Glyma.10G048800	Leucine-rich repeat protein kinase family protein	not expressed	not expressed	n/a	n/a	n/a	n/a	n/a	n/a			DMI2-2
	DMI2-7	Glyma11g37500	Glyma.11G246200	Leucine-rich repeat protein kinase family protein	100	215	-1.10434	-0.578103	0.000717559	0.00144484	0.000256623	TRUE			DMI2-3
	DMI2-8	Glyma13g19960	Glyma.13G136700	Leucine-rich repeat protein kinase family protein	34	177	-2.38014	-1.85391	5.77e-15	2.52e-14	4.48e-15	TRUE			DMI2-4
	DMI2-9	Glyma13g42941	Glyma.13G352900	Leucine-rich repeat transmembrane protein kinase protein	not expressed	not expressed	n/a	n/a	n/a	n/a	n/a	n/a			DMI2-5
	DMI2-10	Glyma15g02450	Glyma.15G021400	Leucine-rich repeat transmembrane protein kinase protein	180	87	1.04891	1.57514	0	0	0	TRUE			DMI2-6
	DMI2-11	Glyma18g01450	Glyma.18G011000	Leucine-rich repeat protein kinase family protein	80	205	-1.35755	-0.831318	5.76e-06	1.45e-05	2.57e-06	TRUE			DMI2-7
	DMI2-12	Glyma19g36211	Glyma.19G178400	Leucine-rich repeat protein kinase family protein	not expressed	not expressed	n/a	n/a	n/a	n/a	n/a	n/a			DMI2-8
MK13-1-RNAi	DMI2-1	Glyma01g02451	Glyma.01G020100	Leucine-rich repeat protein kinase family protein	not expressed	not expressed	n/a	n/a	n/a	n/a	n/a	n/a			DMI2-9
	DMI2-2	Glyma03g33480	Glyma.03G177600	Leucine-rich repeat protein kinase family protein	487	994	-1.02932	-0.294286	0.000192738	0.000351514	5.3e-05	TRUE			DMI2-10
	DMI2-3	Glyma05g27650	Glyma.05G144400	Leucine-rich repeat protein kinase family protein	41	158	-1.94623	-1.21119	2.51e-07	5.5e-07	8.28e-08	TRUE			DMI2-11
	DMI2-4	Glyma08g10640	Glyma.08G100800	Leucine-rich repeat protein kinase family protein	not expressed	not expressed	n/a	n/a	n/a	n/a	n/a	n/a			DMI2-12
	DMI2-5	Glyma09g33510	Glyma.09G202300	Leucine-rich repeat protein kinase family protein	4016	5884	-0.551038	0.184	5.5e-10	1.37e-09	2.06e-10	TRUE
	DMI2-6	Glyma10g05600	Glyma.10G048800	Leucine-rich repeat protein kinase family protein	not expressed	not expressed	n/a	n/a	n/a	n/a	n/a	n/a
	DMI2-7	Glyma11g37500	Glyma.11G246200	Leucine-rich repeat protein kinase family protein	not expressed	not expressed	n/a	n/a	n/a	n/a	n/a	n/a
	DMI2-8	Glyma13g19960	Glyma.13G136700	Leucine-rich repeat protein kinase family protein	37	272	-2.87801	-2.14297	0	0	0	TRUE
	DMI2-9	Glyma13g42941	Glyma.13G352900	Leucine-rich repeat transmembrane protein kinase protein	30	130	-2.11548	-1.38044	2.37e-07	5.2e-07	7.83e-08	TRUE
	DMI2-10	Glyma15g02450	Glyma.15G021400	Leucine-rich repeat transmembrane protein kinase protein	180	180	0	0.735038	1.53e-06	3.21e-06	4.83e-07	TRUE
	DMI2-11	Glyma18g01450	Glyma.18G011000	Leucine-rich repeat protein kinase family protein	78	263	-1.75352	-1.01848	6.7e-09	1.59e-08	2.39e-09	TRUE
	DMI2-12	Glyma19g36211	Glyma.19G178400	Leucine-rich repeat protein kinase family protein	120	419	-1.80392	-1.06888	2.75e-14	8.02e-14	1.21e-14	TRUE
MK16-4-RNAi	DMI2-1	Glyma01g02451	Glyma.01G020100	Leucine-rich repeat protein kinase family protein	3441	7842	-1.18839	-1.00798	0	0	0	TRUE
	DMI2-2	Glyma03g33480	Glyma.03G177600	Leucine-rich repeat protein kinase family protein	487	843	-0.791611	-0.611194	4.06e-14	1.19e-13	1.82e-14	TRUE
	DMI2-3	Glyma05g27650	Glyma.05G144400	Leucine-rich repeat protein kinase family protein	33	338	-3.35649	-3.17607	0	0	0	TRUE
	DMI2-4	Glyma08g10640	Glyma.08G100800	Leucine-rich repeat protein kinase family protein	82	268	-1.70854	-1.52812	0	0	0	TRUE
	DMI2-5	Glyma09g33510	Glyma.09G202300	Leucine-rich repeat protein kinase family protein	4016	9285	-1.20914	-1.02873	0	0	0	TRUE
	DMI2-6	Glyma10g05600	Glyma.10G048800	Leucine-rich repeat protein kinase family protein	143	329	-1.20207	-1.02166	2.1e-13	6.03e-13	9.2e-14	TRUE
	DMI2-7	Glyma11g37500	Glyma.11G246200	Leucine-rich repeat protein kinase family protein	53	137	-1.37011	-1.18969	8.49e-08	1.91e-07	2.91e-08	TRUE
	DMI2-8	Glyma13g19960	Glyma.13G136700	Leucine-rich repeat protein kinase family protein	37	138	-1.89907	-1.71865	1.45e-12	4.04e-12	6.17e-13	TRUE
	DMI2-9	Glyma13g42941	Glyma.13G352900	Leucine-rich repeat transmembrane protein kinase protein	30	261	-3.12102	-2.9406	0	0	0	TRUE
	DMI2-10	Glyma15g02450	Glyma.15G021400	Leucine-rich repeat transmembrane protein kinase protein	180	3975	-4.46489	-4.28447	0	0	0	TRUE
	DMI2-11	Glyma18g01450	Glyma.18G011000	Leucine-rich repeat protein kinase family protein	78	222	-1.50901	-1.3286	1.08e-13	3.12e-13	4.77e-14	TRUE
	DMI2-12	Glyma19g36211	Glyma.19G178400	Leucine-rich repeat protein kinase family protein	120	385	-1.68182	-1.50141	0	0	0	TRUE
MK20-2-RNAi	DMI2-1	Glyma01g02451	Glyma.01G020100	Leucine-rich repeat protein kinase family protein	3441	4332	-0.332205	-0.209904	1.7e-10	4.42e-10	7.47e-11	TRUE
	DMI2-2	Glyma03g33480	Glyma.03G177600	Leucine-rich repeat protein kinase family protein	487	1799	-1.8852	-1.7629	0	0	0	TRUE
	DMI2-3	Glyma05g27650	Glyma.05G144400	Leucine-rich repeat protein kinase family protein	41	252	-2.61973	-4.99485	0	0	0	TRUE
	DMI2-4	Glyma08g10640	Glyma.08G100800	Leucine-rich repeat protein kinase family protein	97	256	-1.40009	-1.27779	4.66e-15	1.44e-14	2.43e-15	TRUE
	DMI2-5	Glyma09g33510	Glyma.09G202300	Leucine-rich repeat protein kinase family protein	4016	3863	0.0560376	0.178339	4.12e-08	9.56e-08	1.62e-08	TRUE
	DMI2-6	Glyma10g05600	Glyma.10G048800	Leucine-rich repeat protein kinase family protein	143	451	-1.65711	-1.53481	0	0	0	TRUE
	DMI2-7	Glyma11g37500	Glyma.11G246200	Leucine-rich repeat protein kinase family protein	100	198	-0.9855	-0.863199	5.55e-07	1.21e-06	2.04e-07	TRUE
	DMI2-8	Glyma13g19960	Glyma.13G136700	Leucine-rich repeat protein kinase family protein	37	224	-2.5979	-2.4756	0	0	0	TRUE
	DMI2-9	Glyma13g42941	Glyma.13G352900	Leucine-rich repeat transmembrane protein kinase protein	not expressed	not expressed	n/a	n/a	n/a	n/a	n/a	n/a
	DMI2-10	Glyma15g02450	Glyma.15G021400	Leucine-rich repeat transmembrane protein kinase protein	not expressed	not expressed	n/a	n/a	n/a	n/a	n/a	n/a
	DMI2-11	Glyma18g01450	Glyma.18G011000	Leucine-rich repeat protein kinase family protein	80	544	-2.76553	-2.64323	0	0	0	TRUE
	DMI2-12	Glyma19g36211	Glyma.19G178400	Leucine-rich repeat protein kinase family protein	148	598	-2.01455	-1.89225	0	0	0	TRUE
DMI3
Sample	Gene name	Accession 1 (2010)	Accession 2 (2015)
MK2-RNAi	DMI3-1	Glyma08g24361	Glyma.08G227200	calmodulin-domain protein kinase cdpk isoform 2	828	3028	-1.87066	-1.6097	0	0	0	TRUE
	DMI3-2	Glyma15g35070	Glyma.15G222300	calmodulin-domain protein kinase cdpk isoform 2	241837	69875	1.79119	2.05215	0	0	0	TRUE
MK3-1-RNAi	DMI3-1	Glyma08g24361	Glyma.08G227200	calmodulin-domain protein kinase cdpk isoform 2	828	1615	-0.963831	-0.615279	0	0	0	TRUE
	DMI3-2	Glyma15g35070	Glyma.15G222300	calmodulin-domain protein kinase cdpk isoform 2	241837	116241	1.05692	1.40547	0	0	0	TRUE
MK3-2-RNAi	DMI3-1	Glyma08g24361	Glyma.08G227200	calmodulin-domain protein kinase cdpk isoform 2	828	2039	-1.30016	-1.1024	0	0	0	TRUE
	DMI3-2	Glyma15g35070	Glyma.15G222300	calmodulin-domain protein kinase cdpk isoform 2	241837	51317	2.23653	2.43428	0	0	0	TRUE
MK4-1-RNAi	DMI3-1	Glyma08g24361	Glyma.08G227200	calmodulin-domain protein kinase cdpk isoform 2	828	4515	-2.44702	-2.15851	0	0	0	TRUE
	DMI3-2	Glyma15g35070	Glyma.15G222300	calmodulin-domain protein kinase cdpk isoform 2	241837	27648	3.12879	3.4173	0	0	0	TRUE
MK5-3-RNAi	DMI3-1	Glyma08g24361	Glyma.08G227200	calmodulin-domain protein kinase cdpk isoform 2	828	1358	-0.713781	-0.891369	0	0	0	TRUE
	DMI3-2	Glyma15g35070	Glyma.15G222300	calmodulin-domain protein kinase cdpk isoform 2	241837	28587	3.0806	2.90302	0	0	0	TRUE
MK6-2-RNAi	DMI3-1	Glyma08g24361	Glyma.08G227200	calmodulin-domain protein kinase cdpk isoform 2	not expressed	not expressed	n/a	n/a	n/a	n/a	n/a	n/a
	DMI3-2	Glyma15g35070	Glyma.15G222300	calmodulin-domain protein kinase cdpk isoform 2	241837	173626	0.478052	1.00429	0	0	0	TRUE
MK13-1-RNAi	DMI3-1	Glyma08g24361	Glyma.08G227200	calmodulin-domain protein kinase cdpk isoform 2	not expressed	not expressed	n/a	n/a	n/a	n/a	n/a	n/a
	DMI3-2	Glyma15g35070	Glyma.15G222300	calmodulin-domain protein kinase cdpk isoform 2	241837	26657	3.18145	3.91649	0	0	0	TRUE
MK16-4-RNAi	DMI3-1	Glyma08g24361	Glyma.08G227200	calmodulin-domain protein kinase cdpk isoform 2	828	2374	-1.51962	-1.3392	0	0	0	TRUE
	DMI3-2	Glyma15g35070	Glyma.15G222300	calmodulin-domain protein kinase cdpk isoform 2	241837	32537	2.89388	3.0743	0	0	0	TRUE
MK20-2-RNAi	DMI3-1	Glyma08g24361	Glyma.08G227200	calmodulin-domain protein kinase cdpk isoform 2	828	1325	-0.67829	-0.555988	0	0	0	TRUE
	DMI3-2	Glyma15g35070	Glyma.15G222300	calmodulin-domain protein kinase cdpk isoform 2	241837	60575	1.99724	2.11954	0	0	0	TRUE
